# Supplementary material for: Whole organism transcriptome analysis of zebrafish models of Bardet-Biedl Syndrome and Alström Syndrome provides mechanistic insight into shared and divergent phenotypes
Source: PubMed Central journal article supplement (PMC4855444; doi:10.1186/s12864-016-2679-1), 2016-05-03
Supplement: 12864_2016_2679_MOESM2_ESM.pdf [file 12864_2016_2679_MOESM2_ESM.pdf]

**Supplementary Table 1. Differentially expressed genes in Alstrom model**

| <b>Feature.ID</b>  | <b>gene_symbol</b> | <b>FC</b>   | <b>LFC(Alms/Control)</b> | <b>p.Value</b> | <b>FDR</b> |
|--------------------|--------------------|-------------|--------------------------|----------------|------------|
| ENSDARG00000094048 | si:dkey-224b4.5    | 115.7397159 | 6.854740198              | 2.45E-58       | 2.92E-56   |
| ENSDARG00000090014 | CAPN2 (3 of 4)     | 102.0821394 | 6.67358666               | 1.92E-224      | 2.09E-221  |
| ENSDARG00000061496 | si:dkeyp-98a7.1    | 42.64106232 | 5.414171475              | 2.87E-20       | 5.60E-19   |
| ENSDARG00000091965 | si:dkey-231p15.1   | 37.9795292  | 5.247150117              | 5.57E-27       | 1.61E-25   |
| ENSDARG00000053512 | crybb2             | 19.4984511  | 4.28528762               | 9.10E-09       | 6.90E-08   |
| ENSDARG00000094508 | si:dkey-21o19.8    | 13.4799287  | 3.75274096               | 9.12E-28       | 2.78E-26   |
| ENSDARG00000052288 | CR788231.1         | 10.57042369 | 3.4019613                | 5.75E-22       | 1.25E-20   |
| ENSDARG00000088533 | BX537263.8         | 10.17675814 | 3.347206152              | 8.92E-18       | 1.48E-16   |
| ENSDARG00000009443 | zgc:92137          | 9.260056803 | 3.211021043              | 3.55E-21       | 7.32E-20   |
| ENSDARG00000094584 | si:ch211-92l17.1   | 8.813295251 | 3.139681537              | 1.43E-14       | 1.87E-13   |
| ENSDARG00000092662 | dnaaf3             | 8.483340861 | 3.084632531              | 7.51E-09       | 5.76E-08   |
| ENSDARG00000091085 | lepa               | 8.142237928 | 3.02542538               | 3.26E-07       | 2.04E-06   |
| ENSDARG00000069481 | ghrh               | 8.065151873 | 3.011701701              | 4.58E-21       | 9.37E-20   |
| ENSDARG00000051775 |                    | 7.859414822 | 2.9744219                | 1.00E-06       | 5.85E-06   |
| ENSDARG00000093639 | si:dkey-90a24.1    | 7.621478155 | 2.93007083               | 2.10E-32       | 7.91E-31   |
| ENSDARG00000079403 | si:dkey-204l11.1   | 7.084454832 | 2.824656838              | 1.54E-35       | 6.92E-34   |
| ENSDARG00000091735 | si:ch211-244h4.1   | 6.81006154  | 2.767667835              | 9.64E-16       | 1.37E-14   |
| ENSDARG00000073775 | VDAC3 (3 of 4)     | 6.278046115 | 2.650315626              | 1.94E-08       | 1.42E-07   |
| ENSDARG00000097054 | si:ch73-65n21.2    | 6.204826685 | 2.633390913              | 5.60E-10       | 4.83E-09   |
| ENSDARG00000046091 | si:ch211-283g2.1   | 5.844420694 | 2.54706003               | 6.52E-12       | 6.78E-11   |
| ENSDARG00000097929 | si:dkey-117j14.6   | 5.625532493 | 2.491989663              | 1.11E-40       | 6.25E-39   |
| ENSDARG00000088775 | NLRP6 (56 of 145)  | 5.592500717 | 2.483493536              | 2.11E-16       | 3.15E-15   |
| ENSDARG00000036628 | cd74b              | 5.571518247 | 2.478070518              | 2.25E-10       | 2.01E-09   |
| ENSDARG00000095893 | si:dkey-85n7.7     | 5.534822265 | 2.46853699               | 2.09E-06       | 1.17E-05   |
| ENSDARG00000096563 | si:dkey-269i1.2    | 5.424981487 | 2.439618214              | 7.46E-07       | 4.44E-06   |
| ENSDARG00000071662 | si:rp71-36a1.3     | 5.360188857 | 2.422283832              | 2.80E-09       | 2.24E-08   |
| ENSDARG00000091765 | PLA2G4C (5 of 5)   | 5.324679667 | 2.412694735              | 4.55E-86       | 1.08E-83   |
| ENSDARG00000074306 | ctslb              | 5.216334268 | 2.383036322              | 8.82E-29       | 2.80E-27   |

|                     |                    |             |             |           |             |
|---------------------|--------------------|-------------|-------------|-----------|-------------|
| ENSDARG00000089750  | si:dkey-26g8.5     | 5.186226783 | 2.374685294 | 3.58E-24  | 8.88E-23    |
| ENSDARG00000002295  | si:dkey-21p1.3     | 5.131649904 | 2.359422749 | 2.78E-18  | 4.78E-17    |
| ENSDARG000000089039 |                    | 4.758108152 | 2.250388065 | 1.50E-05  | 7.43E-05    |
| ENSDARG00000013855  | slc12a3            | 4.732095383 | 2.242479154 | 3.14E-43  | 1.95E-41    |
| ENSDARG000000093898 | NLRP6 (116 of 145) | 4.63657902  | 2.213060743 | 7.28E-17  | 1.12E-15    |
| ENSDARG000000092002 | DHPS (2 of 2)      | 4.628170252 | 2.210441936 | 2.50E-09  | 2.01E-08    |
| ENSDARG000000079376 | zgc:174153         | 4.589422171 | 2.198312523 | 1.90E-47  | 1.46E-45    |
| ENSDARG000000094559 | zgc:174855         | 4.57194461  | 2.192807925 | 1.23E-124 | 5.47E-122   |
| ENSDARG000000077170 | CR394546.2         | 4.570611047 | 2.192387053 | 2.46E-05  | 0.000117984 |
| ENSDARG000000070212 | zgc:158463         | 4.455931644 | 2.155727101 | 4.63E-19  | 8.35E-18    |
| ENSDARG000000069223 | pcdh1g26           | 4.360337076 | 2.124439667 | 1.25E-46  | 9.32E-45    |
| ENSDARG000000097762 | si:dkey-33c14.2    | 4.2628507   | 2.091818528 | 4.21E-08  | 2.94E-07    |
| ENSDARG000000091566 | CR361561.4         | 4.247681314 | 2.086675531 | 1.27E-05  | 6.35E-05    |
| ENSDARG000000040118 | zgc:113232         | 4.102266919 | 2.036421366 | 0         | 0           |
| ENSDARG000000091768 | CR932360.4         | 4.093591913 | 2.033367288 | 5.80E-05  | 0.000259735 |
| ENSDARG000000095252 | si:dkey-40h20.1    | 4.008668856 | 2.003123246 | 5.01E-15  | 6.78E-14    |
| ENSDARG000000091351 | cnp                | 3.954182475 | 1.983379449 | 3.93E-182 | 2.72E-179   |
| ENSDARG000000090918 | si:dkey-269i1.4    | 3.822894952 | 1.934665558 | 7.68E-48  | 6.02E-46    |
| ENSDARG000000074897 | hes2.1             | 3.808313518 | 1.929152253 | 3.89E-50  | 3.37E-48    |
| ENSDARG000000075527 | si:dkey-269i1.3    | 3.801909363 | 1.926724139 | 8.84E-25  | 2.28E-23    |
| ENSDARG000000095072 | si:dkey-26g8.4     | 3.741717485 | 1.903700633 | 8.47E-24  | 2.05E-22    |
| ENSDARG000000039806 | ntlb               | 3.675718771 | 1.878026391 | 1.83E-10  | 1.66E-09    |
| ENSDARG000000086654 | CT027762.3         | 3.663904433 | 1.873381874 | 6.00E-11  | 5.68E-10    |
| ENSDARG000000088111 | CU929417.2         | 3.663809208 | 1.873344377 | 4.62E-19  | 8.32E-18    |
| ENSDARG000000078557 | CU896645.1         | 3.659185263 | 1.871522461 | 8.19E-17  | 1.25E-15    |
| ENSDARG000000026039 | cyp1a              | 3.638569642 | 1.863371424 | 9.76E-194 | 7.70E-191   |
| ENSDARG000000078237 | ZCCHC3             | 3.560243436 | 1.831975891 | 3.36E-05  | 0.000157359 |
| ENSDARG000000085168 | AL935186.3         | 3.50263277  | 1.808439738 | 4.25E-43  | 2.61E-41    |
| ENSDARG000000086605 | si:dkey-8o9.5      | 3.492499821 | 1.804260042 | 9.39E-05  | 0.000405205 |
| ENSDARG000000090070 | CABZ01060490.2     | 3.472730962 | 1.796070647 | 2.34E-09  | 1.89E-08    |

|                    |                    |             |             |             |             |
|--------------------|--------------------|-------------|-------------|-------------|-------------|
| ENSDARG00000057504 |                    | 3.454658864 | 1.788543256 | 1.72E-76    | 3.39E-74    |
| ENSDARG00000074745 | CABZ01044297.1     | 3.452275778 | 1.787547716 | 0           | 0           |
| ENSDARG00000091770 | si:ch211-113a14.14 | 3.448535163 | 1.785983677 | 2.83E-06    | 1.56E-05    |
| ENSDARG00000089397 | wu:fe11b02         | 3.430491358 | 1.778415232 | 7.97E-05    | 0.000348311 |
| ENSDARG00000090354 | MLLT4 (2 of 2)     | 3.416154398 | 1.772373181 | 7.97E-05    | 0.000348326 |
| ENSDARG00000002293 | si:ch211-197g15.9  | 3.397699598 | 1.764558305 | 1.88E-10    | 1.70E-09    |
| ENSDARG00000096603 | bmb                | 3.344338695 | 1.741720963 | 2.78E-57    | 3.14E-55    |
| ENSDARG00000044329 | opa1               | 3.311692364 | 1.727568661 | 8.09E-29    | 2.57E-27    |
| ENSDARG00000094744 | zgc:171759         | 3.299696063 | 1.722333143 | 3.12E-06    | 1.70E-05    |
| ENSDARG00000091205 | si:ch211-113a14.19 | 3.281954844 | 1.714555389 | 0.000185435 | 0.00075896  |
| ENSDARG00000069936 | si:dkey-281i8.1    | 3.268164489 | 1.708480597 | 7.44E-51    | 6.66E-49    |
| ENSDARG00000031483 | col9a1             | 3.225651465 | 1.689590562 | 0           | 0           |
| ENSDARG00000074069 | zgc:171452         | 3.181672484 | 1.669785335 | 2.91E-10    | 2.58E-09    |
| ENSDARG00000058891 | nedd9              | 3.175846135 | 1.667141018 | 1.32E-27    | 3.95E-26    |
| ENSDARG00000023656 | he1a               | 3.168761773 | 1.663919202 | 1.77E-239   | 2.10E-236   |
| ENSDARG00000078962 | DUOXA1             | 3.166206757 | 1.662755468 | 5.09E-10    | 4.40E-09    |
| ENSDARG00000095529 | gusb               | 3.1623727   | 1.661007406 | 2.65E-24    | 6.67E-23    |
| ENSDARG00000094439 | tmem176l.3a        | 3.147271454 | 1.654101617 | 2.22E-18    | 3.84E-17    |
| ENSDARG00000089021 | si:dkey-7f16.3     | 3.14590962  | 1.653477224 | 4.04E-05    | 0.000186349 |
| ENSDARG00000089806 | si:dkey-239j18.3   | 3.132909263 | 1.647502986 | 1.10E-192   | 8.42E-190   |
| ENSDARG00000068941 | HIST2H3C           | 3.123542014 | 1.643182935 | 1.59E-06    | 9.06E-06    |
| ENSDARG00000078299 | COLGALT2 (2 of 2)  | 3.105058891 | 1.634620631 | 2.99E-20    | 5.82E-19    |
| ENSDARG00000061564 | nlrc3              | 3.098803144 | 1.631711108 | 1.60E-06    | 9.09E-06    |
| ENSDARG00000088623 | CR388079.2         | 3.089758672 | 1.62749416  | 5.02E-06    | 2.67E-05    |
| ENSDARG00000058815 | ihhb               | 3.08214762  | 1.623935962 | 1.05E-08    | 7.88E-08    |
| ENSDARG00000070265 |                    | 3.072481758 | 1.619404445 | 0.000769325 | 0.002779953 |
| ENSDARG00000095744 | si:dkey-269i1.4    | 3.066257173 | 1.616478704 | 7.40E-11    | 6.93E-10    |
| ENSDARG00000088845 | CABZ01085177.1     | 3.064053613 | 1.615441541 | 2.37E-06    | 1.32E-05    |
| ENSDARG00000061480 |                    | 3.034092611 | 1.601265122 | 7.47E-06    | 3.87E-05    |
| ENSDARG00000033999 | cyp26a1            | 3.005847591 | 1.58777186  | 8.48E-219   | 8.30E-216   |

|                    |                    |             |             |             |             |
|--------------------|--------------------|-------------|-------------|-------------|-------------|
| ENSDARG00000071368 | si:dkey-86k10.3    | 2.978998544 | 1.574827418 | 9.21E-06    | 4.71E-05    |
| ENSDARG00000078674 | hspb9              | 2.960703657 | 1.565940095 | 4.50E-114   | 1.85E-111   |
| ENSDARG00000089456 | men1               | 2.952328765 | 1.561853386 | 5.60E-41    | 3.18E-39    |
| ENSDARG00000095866 | fabp1b.2           | 2.948314232 | 1.559890295 | 0.000525529 | 0.001966075 |
| ENSDARG00000087004 | si:ch211-122l24.4  | 2.942425482 | 1.557005879 | 1.13E-08    | 8.47E-08    |
| ENSDARG00000007344 | tcap               | 2.931734115 | 1.551754268 | 1.62E-96    | 4.95E-94    |
| ENSDARG00000089064 | CR848728.2         | 2.926279303 | 1.549067476 | 7.22E-08    | 4.90E-07    |
| ENSDARG00000098037 | si:ch73-65n21.1    | 2.923768854 | 1.54782926  | 0.000241291 | 0.000964893 |
| ENSDARG00000090572 | si:busm1-180g5.7   | 2.91684047  | 1.544406483 | 0.000433442 | 0.001652716 |
| ENSDARG00000092241 | si:dkey-240n22.7   | 2.910877775 | 1.541454263 | 7.38E-23    | 1.70E-21    |
| ENSDARG00000096322 | si:ch73-379f7.4    | 2.894535607 | 1.533331904 | 5.16E-05    | 0.000233102 |
| ENSDARG00000075538 | zgc:163061         | 2.882502488 | 1.527321853 | 1.66E-11    | 1.66E-10    |
| ENSDARG00000055527 | cmn                | 2.876914815 | 1.524522504 | 0           | 0           |
| ENSDARG00000089836 | MRPS12 (2 of 2)    | 2.855994914 | 1.51399341  | 2.22E-57    | 2.53E-55    |
| ENSDARG00000094311 | SUSD1 (2 of 2)     | 2.847925014 | 1.509911161 | 1.03E-10    | 9.50E-10    |
| ENSDARG00000019742 | tlr4ba             | 2.841824491 | 1.506817458 | 2.08E-06    | 1.16E-05    |
| ENSDARG00000087934 | CABZ01080435.1     | 2.814514936 | 1.492886304 | 7.94E-17    | 1.22E-15    |
| ENSDARG00000001937 | CABZ01043017.1     | 2.807146108 | 1.489104156 | 6.54E-14    | 8.07E-13    |
| ENSDARG00000086515 | rad21a             | 2.803006523 | 1.486975101 | 3.87E-301   | 5.78E-298   |
| ENSDARG00000086709 | si:ch211-113a14.14 | 2.800403752 | 1.485634845 | 0.001150789 | 0.00399902  |
| ENSDARG00000089031 | larsa              | 2.792370379 | 1.481490313 | 0.000937434 | 0.003323938 |
| ENSDARG00000077218 | SLC22A17 (1 of 2)  | 2.79047269  | 1.480509527 | 3.26E-09    | 2.59E-08    |
| ENSDARG00000032640 | PDXK (1 of 3)      | 2.78812731  | 1.479296439 | 2.26E-35    | 1.01E-33    |
| ENSDARG00000084432 | 5S_rRNA            | 2.770151828 | 1.469965051 | 0.002073212 | 0.006800654 |
| ENSDARG00000088726 |                    | 2.76865943  | 1.4691876   | 8.84E-08    | 5.95E-07    |
| ENSDARG00000087315 | CT956064.2         | 2.764236461 | 1.466881033 | 0.000938943 | 0.003328871 |
| ENSDARG00000086076 | HIST1H4D           | 2.747230182 | 1.457977794 | 0.000766257 | 0.002770981 |
| ENSDARG00000088321 |                    | 2.745602981 | 1.457123024 | 5.58E-09    | 4.34E-08    |
| ENSDARG00000097785 | hist2h3c           | 2.744255413 | 1.456414762 | 0.000766165 | 0.002770981 |
| ENSDARG00000091905 | si:dkey-108k21.21  | 2.742861021 | 1.455681524 | 1.64E-05    | 8.09E-05    |

|                    |                    |             |             |             |             |
|--------------------|--------------------|-------------|-------------|-------------|-------------|
| ENSDARG00000097752 | si:rp71-77 1.2     | 2.715561172 | 1.441250363 | 0.000133011 | 0.000559896 |
| ENSDARG00000054321 | ngs                | 2.715231889 | 1.441075414 | 1.16E-279   | 1.57E-276   |
| ENSDARG00000075330 | phox2ba            | 2.683641228 | 1.424191813 | 0.000627558 | 0.002308528 |
| ENSDARG00000074491 | zgc:171759         | 2.683134476 | 1.423919363 | 1.52E-09    | 1.25E-08    |
| ENSDARG00000009905 | ntla               | 2.671684061 | 1.417749413 | 2.70E-54    | 2.78E-52    |
| ENSDARG00000097560 | zgc:162999         | 2.654948754 | 1.408684015 | 0.000157039 | 0.00065119  |
| ENSDARG00000045071 | chad               | 2.653768314 | 1.408042423 | 2.20E-140   | 1.12E-137   |
| ENSDARG00000078334 | zgc:174938         | 2.639944826 | 1.400507778 | 1.92E-17    | 3.09E-16    |
| ENSDARG00000092665 | si:ch1073-382c16.2 | 2.622608134 | 1.391002259 | 9.18E-63    | 1.25E-60    |
| ENSDARG00000079384 | CCDC134 (2 of 2)   | 2.62207015  | 1.390706284 | 1.24E-09    | 1.03E-08    |
| ENSDARG00000055160 | chadla             | 2.61091853  | 1.384557441 | 3.26E-44    | 2.16E-42    |
| ENSDARG00000091587 | CABZ01076758.1     | 2.602855114 | 1.380095007 | 4.36E-09    | 3.44E-08    |
| ENSDARG00000079002 | dnai1              | 2.599085652 | 1.378004178 | 0.001306169 | 0.004474332 |
| ENSDARG00000088906 | CABZ01059404.1     | 2.582066741 | 1.368526292 | 2.46E-07    | 1.57E-06    |
| ENSDARG00000038805 | pigp               | 2.543048375 | 1.346558906 | 8.55E-26    | 2.33E-24    |
| ENSDARG00000007329 | tbx16              | 2.531366619 | 1.339916469 | 0.000141701 | 0.00059322  |
| ENSDARG00000039547 | zgc:171759         | 2.526730009 | 1.337271515 | 0.004123698 | 0.012608751 |
| ENSDARG00000053799 | BX855590.1         | 2.525360579 | 1.336489395 | 3.18E-06    | 1.74E-05    |
| ENSDARG00000090531 | ttc25              | 2.51763985  | 1.33207192  | 6.67E-05    | 0.000295885 |
| ENSDARG00000008948 | PLA2G3 (1 of 2)    | 2.513217076 | 1.329535287 | 5.45E-05    | 0.000245114 |
| ENSDARG00000085949 | AL935186.4         | 2.500505577 | 1.322219823 | 4.37E-50    | 3.77E-48    |
| ENSDARG00000091491 | BX511078.2         | 2.498224822 | 1.320903315 | 0.000374386 | 0.001444361 |
| ENSDARG00000087157 | cant1b             | 2.487453377 | 1.314669485 | 1.01E-14    | 1.35E-13    |
| ENSDARG00000092215 | BX901907.1         | 2.47089471  | 1.305033536 | 3.61E-16    | 5.31E-15    |
| ENSDARG00000091707 | CABZ01059421.1     | 2.470631168 | 1.304879652 | 3.46E-06    | 1.88E-05    |
| ENSDARG00000046140 | zgc:112038         | 2.470485934 | 1.304794842 | 0.000163289 | 0.000674936 |
| ENSDARG00000093721 | si:dkey-238o14.8   | 2.470258559 | 1.304662055 | 0.000806314 | 0.002899583 |
| ENSDARG00000090745 | NLRP6 (81 of 145)  | 2.46838561  | 1.303567789 | 0.000807586 | 0.002903789 |
| ENSDARG00000010591 | foxn4              | 2.463052172 | 1.300447187 | 2.23E-221   | 2.35E-218   |
| ENSDARG00000087917 | BX649341.1         | 2.446175663 | 1.290528009 | 0.000653718 | 0.002396994 |

|                    |                    |             |             |             |             |
|--------------------|--------------------|-------------|-------------|-------------|-------------|
| ENSDARG00000091245 | dnajc7             | 2.444758291 | 1.289691836 | 3.05E-101   | 1.02E-98    |
| ENSDARG00000092148 | GPBAR1 (2 of 2)    | 2.440224862 | 1.287014095 | 0.000348773 | 0.001354064 |
| ENSDARG00000092910 | si:dkey-264f17.4   | 2.431601301 | 1.281906696 | 0.005892884 | 0.017269132 |
| ENSDARG00000004763 | HLA2 (1 of 4)      | 2.42158144  | 1.275949523 | 4.94E-11    | 4.70E-10    |
| ENSDARG00000088053 | PCDHGC5 (16 of 31) | 2.421051791 | 1.275633942 | 4.78E-05    | 0.000217361 |
| ENSDARG00000045634 | lmod2a             | 2.418722032 | 1.274244979 | 0.001141179 | 0.003968539 |
| ENSDARG00000086239 | CR847893.1         | 2.417126652 | 1.273293069 | 0.004729149 | 0.014224028 |
| ENSDARG00000097488 | UNC80 (2 of 2)     | 2.411165455 | 1.269730652 | 3.90E-07    | 2.42E-06    |
| ENSDARG00000085592 | 5S_rRNA            | 2.398143031 | 1.261917707 | 6.66E-05    | 0.00029547  |
| ENSDARG00000018765 | pknox1.1           | 2.394475598 | 1.259709733 | 2.64E-43    | 1.65E-41    |
| ENSDARG00000090889 | BX005069.4         | 2.393512263 | 1.259129198 | 0.002464879 | 0.007961212 |
| ENSDARG00000088951 | AL935186.6         | 2.384143373 | 1.253470996 | 0           | 0           |
| ENSDARG00000086374 | isg15              | 2.382846263 | 1.252685875 | 0.000261556 | 0.001039341 |
| ENSDARG00000097036 | si:dkey-86k10.5    | 2.377974824 | 1.249733441 | 0.001603525 | 0.005400386 |
| ENSDARG00000056210 | si:ch211-199o1.2   | 2.374957492 | 1.247901692 | 1.61E-26    | 4.51E-25    |
| ENSDARG00000015512 | aqp8b              | 2.373979445 | 1.247307443 | 1.50E-17    | 2.43E-16    |
| ENSDARG00000045011 | TAPBP (1 of 2)     | 2.369902983 | 1.244828001 | 0.000212402 | 0.000857952 |
| ENSDARG00000088303 | NLRP6 (49 of 145)  | 2.363994974 | 1.241226968 | 2.45E-07    | 1.56E-06    |
| ENSDARG00000008333 | znfl2a             | 2.346171072 | 1.230308212 | 1.49E-14    | 1.95E-13    |
| ENSDARG00000089644 | ints12             | 2.345092973 | 1.229645121 | 4.59E-13    | 5.28E-12    |
| ENSDARG00000086785 |                    | 2.332070568 | 1.221611445 | 3.32E-05    | 0.00015557  |
| ENSDARG00000078878 | METTL21C (2 of 2)  | 2.324317721 | 1.21680729  | 8.43E-11    | 7.85E-10    |
| ENSDARG00000077017 | AL935044.2         | 2.315721035 | 1.211461468 | 1.61E-08    | 1.18E-07    |
| ENSDARG00000096489 | si:dkey-227h16.2   | 2.315419057 | 1.211273324 | 1.39E-91    | 3.69E-89    |
| ENSDARG00000019122 | he1b               | 2.310907227 | 1.208459343 | 3.15E-80    | 6.78E-78    |
| ENSDARG00000057010 | si:dkey-154b15.1   | 2.301346667 | 1.202478323 | 1.78E-11    | 1.76E-10    |
| ENSDARG00000088277 | susd5              | 2.29200845  | 1.196612363 | 1.79E-13    | 2.14E-12    |
| ENSDARG00000089812 | CABZ01017733.1     | 2.278418454 | 1.188032737 | 0.000177948 | 0.000730742 |
| ENSDARG00000058738 | SLC26A6 (3 of 4)   | 2.264262917 | 1.179041488 | 3.30E-07    | 2.06E-06    |
| ENSDARG00000068168 | hes2.2             | 2.260672996 | 1.176752323 | 2.01E-68    | 3.20E-66    |

|                    |                   |             |             |             |             |
|--------------------|-------------------|-------------|-------------|-------------|-------------|
| ENSDARG00000076237 | CU302319.2        | 2.259122339 | 1.175762399 | 0.000458198 | 0.001735916 |
| ENSDARG00000091667 | si:dkey-234i14.3  | 2.257018182 | 1.174418041 | 4.68E-05    | 0.000213167 |
| ENSDARG00000090977 | ifit5             | 2.255104065 | 1.173194011 | 0.000458089 | 0.001735738 |
| ENSDARG00000079486 | fam20a            | 2.25161973  | 1.170963195 | 5.23E-19    | 9.40E-18    |
| ENSDARG00000088436 | CT956064.3        | 2.251451353 | 1.170855306 | 4.66E-207   | 4.01E-204   |
| ENSDARG00000076461 | pcdh1g18          | 2.241821243 | 1.164671246 | 0.005378736 | 0.015909757 |
| ENSDARG00000060211 | ankef1b           | 2.234182272 | 1.159746891 | 0.001820209 | 0.006053349 |
| ENSDARG00000089263 | CU915826.1        | 2.224023581 | 1.153172085 | 0.000510121 | 0.001914741 |
| ENSDARG00000001767 | slc29a2           | 2.219345607 | 1.150134349 | 1.47E-105   | 5.08E-103   |
| ENSDARG00000086957 | si:dkeyp-118a3.2  | 2.218837153 | 1.149803787 | 4.16E-25    | 1.08E-23    |
| ENSDARG00000005959 | echdc1            | 2.21516341  | 1.147413129 | 1.25E-05    | 6.24E-05    |
| ENSDARG00000068589 | CABZ01079764.1    | 2.214396274 | 1.14691342  | 4.83E-155   | 2.80E-152   |
| ENSDARG00000095163 | ZBED1 (10 of 10)  | 2.208316324 | 1.142946842 | 0.000179901 | 0.000738226 |
| ENSDARG00000014594 | anxa1b            | 2.206818939 | 1.141968267 | 2.02E-109   | 7.55E-107   |
| ENSDARG00000089875 | si:ch211-226o13.2 | 2.206079498 | 1.14148478  | 1.07E-22    | 2.44E-21    |
| ENSDARG00000074191 | zgc:172253        | 2.205435953 | 1.141063865 | 1.25E-05    | 6.25E-05    |
| ENSDARG00000090297 | ldlrad2           | 2.194184926 | 1.133685121 | 2.15E-16    | 3.21E-15    |
| ENSDARG00000085067 | AL935186.2        | 2.192620194 | 1.13265593  | 1.10E-197   | 8.90E-195   |
| ENSDARG00000078579 | zgc:175280        | 2.192319081 | 1.13245779  | 4.52E-12    | 4.79E-11    |
| ENSDARG00000076521 | MMP21             | 2.189522644 | 1.13061637  | 0.002496241 | 0.008048767 |
| ENSDARG00000077570 | CDH16             | 2.184333066 | 1.127192854 | 0.005952365 | 0.017424909 |
| ENSDARG00000004328 | CABZ01041200.1    | 2.18288472  | 1.126235942 | 3.44E-05    | 0.000160802 |
| ENSDARG00000090557 | MFAP4 (6 of 14)   | 2.179009849 | 1.123672717 | 1.29E-17    | 2.11E-16    |
| ENSDARG00000010332 | zgc:56231         | 2.178732229 | 1.123488897 | 0.00021916  | 0.000883148 |
| ENSDARG00000043993 | KCNIP2 (1 of 2)   | 2.177694308 | 1.122801451 | 8.72E-05    | 0.000379123 |
| ENSDARG00000092583 | si:dkey-16p19.5   | 2.170366052 | 1.117938387 | 1.87E-05    | 9.12E-05    |
| ENSDARG00000090113 | fabp11a           | 2.162257099 | 1.112538074 | 1.48E-83    | 3.45E-81    |
| ENSDARG00000070788 | DUPD1 (7 of 12)   | 2.152739318 | 1.10617363  | 0.000410444 | 0.001571569 |
| ENSDARG00000092933 | cbx8a             | 2.147132143 | 1.102410983 | 3.18E-09    | 2.53E-08    |
| ENSDARG00000091988 | si:dkey-164n2.1   | 2.146221886 | 1.101799236 | 7.02E-05    | 0.000309408 |

|                    |                    |             |             |             |             |
|--------------------|--------------------|-------------|-------------|-------------|-------------|
| ENSDARG00000091063 | FANCM (3 of 3)     | 2.146209791 | 1.101791106 | 0.000196    | 0.000798518 |
| ENSDARG00000076554 | cdkn1a             | 2.141027352 | 1.098303226 | 2.08E-34    | 8.86E-33    |
| ENSDARG00000091219 | CABZ01078767.1     | 2.140222742 | 1.097760952 | 0.000410972 | 0.001573167 |
| ENSDARG00000079957 | CABZ01066734.1     | 2.139502181 | 1.097275149 | 0.006534681 | 0.018922708 |
| ENSDARG00000069252 | bon                | 2.133867382 | 1.093470517 | 0.000241712 | 0.000966303 |
| ENSDARG00000043518 | si:dkey-239i20.2   | 2.131995965 | 1.092204708 | 8.27E-06    | 4.25E-05    |
| ENSDARG00000086751 | zgc:112234         | 2.131932899 | 1.092162031 | 0.002228226 | 0.007266312 |
| ENSDARG00000070242 | ENDOD1 (5 of 13)   | 2.125192501 | 1.087593527 | 0.000215288 | 0.000868497 |
| ENSDARG00000091348 | rtn3               | 2.123789391 | 1.086640706 | 6.68E-72    | 1.16E-69    |
| ENSDARG00000054649 | rac1l              | 2.122218176 | 1.085572981 | 8.08E-06    | 4.16E-05    |
| ENSDARG00000097148 | si:ch73-21b16.1    | 2.120806078 | 1.08461271  | 0.012663306 | 0.034063238 |
| ENSDARG00000074260 | si:ch211-113a14.19 | 2.119227128 | 1.083538216 | 0.012672198 | 0.034080696 |
| ENSDARG00000042145 | lhx8b              | 2.11741069  | 1.08230112  | 0.006554436 | 0.01897604  |
| ENSDARG00000096310 | TAF1C              | 2.11623741  | 1.081501485 | 4.31E-35    | 1.90E-33    |
| ENSDARG00000092569 | si:dkey-73n10.7p   | 2.113890008 | 1.079900311 | 3.04E-05    | 0.00014338  |
| ENSDARG00000016227 | CU571323.1         | 2.112650872 | 1.079054373 | 0.000493166 | 0.001855025 |
| ENSDARG00000096063 | si:dkey-191j3.1    | 2.108053762 | 1.075911661 | 0.012681991 | 0.034092208 |
| ENSDARG00000073747 | si:dkey-1j5.4      | 2.103201351 | 1.072586974 | 2.32E-18    | 3.99E-17    |
| ENSDARG00000022020 | FOCAD              | 2.101668006 | 1.071534789 | 3.55E-65    | 5.15E-63    |
| ENSDARG00000068453 | NLRP6 (4 of 145)   | 2.098309686 | 1.069227618 | 0.000846971 | 0.003031581 |
| ENSDARG00000012609 | hpx                | 2.09688592  | 1.068248374 | 0.000537292 | 0.002006379 |
| ENSDARG00000095377 | si:ch211-28e16.4   | 2.092226732 | 1.065039203 | 0.000191594 | 0.000782475 |
| ENSDARG00000056374 | noxo1b             | 2.090838938 | 1.064081932 | 7.26E-06    | 3.77E-05    |
| ENSDARG00000095528 | si:dkey-121n8.5    | 2.089072299 | 1.062862423 | 1.30E-07    | 8.58E-07    |
| ENSDARG00000070770 | her4.3             | 2.089052907 | 1.06284903  | 7.04E-56    | 7.57E-54    |
| ENSDARG00000079603 | si:ch211-256e16.6  | 2.088683981 | 1.062594228 | 0.000235337 | 0.000943077 |
| ENSDARG00000091744 | BX296557.7         | 2.082814991 | 1.058534695 | 7.81E-203   | 6.52E-200   |
| ENSDARG00000078262 | PCDHGC4 (8 of 9)   | 2.079458711 | 1.056208039 | 2.24E-50    | 1.96E-48    |
| ENSDARG00000096128 | si:dkey-233e3.5    | 2.078815862 | 1.055761972 | 0.000538682 | 0.002011043 |
| ENSDARG00000014402 | smc1b              | 2.078599392 | 1.055611734 | 2.15E-05    | 0.000103865 |



|                    |                    |             |              |             |             |
|--------------------|--------------------|-------------|--------------|-------------|-------------|
| ENSDARG00000041141 | cryba1a            | 2.073883244 | 1.052334675  | 2.87E-07    | 1.81E-06    |
| ENSDARG00000078432 | ZACN (1 of 2)      | 2.071122057 | 1.050412578  | 6.30E-07    | 3.79E-06    |
| ENSDARG00000090248 | BX649497.1         | 2.069928988 | 1.049581275  | 0.000315249 | 0.00123404  |
| ENSDARG00000089831 | NLRP6 (70 of 145)  | 2.062384957 | 1.044313646  | 2.64E-11    | 2.57E-10    |
| ENSDARG00000020978 | dhrs13a.2          | 2.052317348 | 1.037253831  | 5.17E-77    | 1.04E-74    |
| ENSDARG00000075366 | si:ch211-113a14.10 | 2.05046136  | 1.035948557  | 0.017253652 | 0.044789434 |
| ENSDARG00000097721 | si:dkey-234i14.21  | 2.046623227 | 1.033245534  | 0.004076869 | 0.01248864  |
| ENSDARG00000097716 | si:dkey-86k10.8    | 2.046479744 | 1.033144387  | 0.002886814 | 0.009155232 |
| ENSDARG00000008022 | kif18a             | 2.046137275 | 1.032902938  | 1.53E-72    | 2.69E-70    |
| ENSDARG00000070945 | zgc:163083         | 2.044860653 | 1.032002534  | 0.017256735 | 0.04479334  |
| ENSDARG00000088717 | C6H2orf40 (2 of 2) | 2.044390886 | 1.031671065  | 3.42E-29    | 1.11E-27    |
| ENSDARG00000077716 | CMYA5 (2 of 2)     | 2.043813627 | 1.031263645  | 3.93E-16    | 5.78E-15    |
| ENSDARG00000089863 | CCDC57             | 2.043643705 | 1.031143695  | 1.98E-32    | 7.45E-31    |
| ENSDARG00000086561 | tk1                | 2.043219423 | 1.030844144  | 4.53E-59    | 5.54E-57    |
| ENSDARG00000090419 | CABZ01078499.2     | 2.041204557 | 1.029420768  | 0.003569173 | 0.011064592 |
| ENSDARG00000089709 | GFRAL              | 2.035952467 | 1.02570388   | 0.000200557 | 0.00081486  |
| ENSDARG00000034423 | sncga              | 2.035707475 | 1.025530266  | 1.40E-113   | 5.66E-111   |
| ENSDARG00000046098 | ebp                | 2.034529927 | 1.024695502  | 1.24E-19    | 2.33E-18    |
| ENSDARG00000090491 | Metazoa_SRP        | 2.03294572  | 1.023571696  | 0.009681859 | 0.026800477 |
| ENSDARG00000044671 | wfikkn1            | 2.025417821 | 1.018219551  | 0.012027923 | 0.032505054 |
| ENSDARG00000088392 | si:dkey-238o14.9   | 2.021187946 | 1.015203481  | 0.002212001 | 0.007219206 |
| ENSDARG00000077129 | notch1a            | 2.021027529 | 1.015088973  | 7.81E-79    | 1.64E-76    |
| ENSDARG00000077862 | si:dkey-169i5.4    | 2.011609337 | 1.008350155  | 0.000491159 | 0.001848457 |
| ENSDARG00000090493 | BX005380.2         | 2.011156286 | 1.008025197  | 0.007299506 | 0.020873381 |
| ENSDARG00000035560 | capga              | 2.006670576 | 1.004803797  | 0.012975019 | 0.034786337 |
| ENSDARG00000086668 | si:dkey-7j22.4     | 2.002636595 | 1.001900649  | 0.000205733 | 0.000833385 |
| ENSDARG00000089347 |                    | 2.001667954 | 1.001202673  | 3.17E-43    | 1.96E-41    |
| ENSDARG00000087258 | ypel2b             | 0.499650676 | -1.001008289 | 0.002473764 | 0.007983549 |
| ENSDARG00000075985 | FP243385.1         | 0.499509736 | -1.001415296 | 0.01500211  | 0.039563308 |
| ENSDARG00000038185 | gh1                | 0.499458696 | -1.001562718 | 5.69E-10    | 4.90E-09    |

|                    |                   |             |              |             |             |
|--------------------|-------------------|-------------|--------------|-------------|-------------|
| ENSDARG00000060051 | slc47a2           | 0.499117504 | -1.002548596 | 6.98E-06    | 3.63E-05    |
| ENSDARG00000071735 | prlh2             | 0.498423108 | -1.004557139 | 0.000386532 | 0.001488848 |
| ENSDARG00000015134 | CAMKK1 (1 of 2)   | 0.498366452 | -1.004721139 | 0.000446774 | 0.001698305 |
| ENSDARG00000074839 | impq1b            | 0.497847685 | -1.006223674 | 1.17E-13    | 1.41E-12    |
| ENSDARG00000097039 | si:dkey-199l17.8  | 0.497266601 | -1.00790856  | 8.96E-06    | 4.59E-05    |
| ENSDARG00000054055 | ostn              | 0.496778595 | -1.009325081 | 0.001234617 | 0.004254386 |
| ENSDARG00000091614 | CR848032.2        | 0.496727655 | -1.009473026 | 6.57E-05    | 0.000291856 |
| ENSDARG00000092534 | si:ch211-62a1.3   | 0.496174547 | -1.011080366 | 3.59E-05    | 0.00016732  |
| ENSDARG00000062606 | si:dkey-26i13.8   | 0.495861805 | -1.011989993 | 4.94E-06    | 2.63E-05    |
| ENSDARG00000054184 | btr06             | 0.495796072 | -1.012181252 | 0.003461195 | 0.010761591 |
| ENSDARG00000044632 | myo7ab            | 0.495568476 | -1.012843676 | 1.75E-24    | 4.44E-23    |
| ENSDARG00000087801 |                   | 0.495459446 | -1.013161119 | 0.013030977 | 0.034919868 |
| ENSDARG00000077128 | galnt13           | 0.495373438 | -1.013411582 | 3.19E-25    | 8.35E-24    |
| ENSDARG00000088300 | VSTM2A (2 of 2)   | 0.494934544 | -1.014690355 | 0.009963569 | 0.027478231 |
| ENSDARG00000036433 | ERP27             | 0.493667133 | -1.018389496 | 4.16E-05    | 0.000191425 |
| ENSDARG00000098044 | si:ch211-136a13.3 | 0.493128083 | -1.019965681 | 3.42E-08    | 2.42E-07    |
| ENSDARG00000039626 | nrgna             | 0.49297229  | -1.020421541 | 5.19E-21    | 1.06E-19    |
| ENSDARG00000091459 |                   | 0.492632173 | -1.021417244 | 0.000137584 | 0.000577689 |
| ENSDARG00000092920 | si:ch211-106h4.12 | 0.492538738 | -1.021690899 | 1.39E-06    | 7.98E-06    |
| ENSDARG00000097157 | si:ch211-207n23.2 | 0.491708359 | -1.024125214 | 1.16E-18    | 2.04E-17    |
| ENSDARG00000034667 | CABZ01090041.1    | 0.491620184 | -1.024383947 | 2.85E-06    | 1.57E-05    |
| ENSDARG00000090126 |                   | 0.490552167 | -1.027521528 | 4.91E-05    | 0.000222887 |
| ENSDARG00000094702 | si:dkey-61n16.5   | 0.490463102 | -1.02778349  | 3.15E-07    | 1.98E-06    |
| ENSDARG00000010244 | rpl22l1           | 0.4897806   | -1.029792464 | 4.06E-208   | 3.60E-205   |
| ENSDARG00000002644 | rgs5a             | 0.489698047 | -1.030035653 | 1.98E-57    | 2.26E-55    |
| ENSDARG00000052700 | si:dkey-162b23.4  | 0.489508487 | -1.030594222 | 2.77E-96    | 8.35E-94    |
| ENSDARG00000095045 | ZC3H7B (3 of 3)   | 0.489183769 | -1.031551557 | 0.008903419 | 0.0248637   |
| ENSDARG00000037359 | CDR2 (2 of 2)     | 0.488930298 | -1.032299285 | 0.000389018 | 0.001497409 |
| ENSDARG00000005332 | lipi              | 0.488914843 | -1.032344889 | 0.000958593 | 0.003392607 |
| ENSDARG00000087295 | ZFYVE9 (3 of 3)   | 0.488914843 | -1.032344889 | 0.000958593 | 0.003392607 |

|                    |                   |             |              |             |             |
|--------------------|-------------------|-------------|--------------|-------------|-------------|
| ENSDARG00000090560 | mfap5             | 0.488633641 | -1.033174904 | 0.000597833 | 0.002208916 |
| ENSDARG00000080804 | 5S_rRNA           | 0.488584811 | -1.03331908  | 0.002396231 | 0.007761569 |
| ENSDARG00000097576 | VAMP1 (2 of 2)    | 0.488446545 | -1.033727412 | 1.38E-11    | 1.39E-10    |
| ENSDARG00000063475 | abcg1             | 0.488140181 | -1.034632585 | 5.43E-11    | 5.16E-10    |
| ENSDARG00000037588 | bhlhe23           | 0.488128397 | -1.034667411 | 1.96E-58    | 2.34E-56    |
| ENSDARG00000074666 | CA4 (4 of 5)      | 0.487057246 | -1.037836745 | 0.000335251 | 0.001305319 |
| ENSDARG00000062902 | TULP2             | 0.486684502 | -1.03894126  | 3.37E-22    | 7.40E-21    |
| ENSDARG00000092142 | si:ch211-136a13.2 | 0.486629594 | -1.039104036 | 7.47E-06    | 3.87E-05    |
| ENSDARG00000044276 | spp1              | 0.486603063 | -1.039182693 | 3.11E-05    | 0.000146555 |
| ENSDARG00000056084 | igsf21b           | 0.486479819 | -1.039548136 | 1.18E-24    | 3.03E-23    |
| ENSDARG00000027153 | gabrr3a           | 0.486416776 | -1.039735109 | 5.47E-09    | 4.26E-08    |
| ENSDARG00000092694 | si:ch211-106j21.2 | 0.486243117 | -1.040250268 | 0.011199807 | 0.030508189 |
| ENSDARG00000069117 | kcnh5b            | 0.486013396 | -1.040932015 | 1.28E-06    | 7.39E-06    |
| ENSDARG00000009311 | pvalb6            | 0.485966875 | -1.041070116 | 3.86E-32    | 1.43E-30    |
| ENSDARG00000040781 | zgc:113317        | 0.485531054 | -1.042364523 | 4.62E-32    | 1.71E-30    |
| ENSDARG00000097855 | si:ch211-3o3.9    | 0.485360679 | -1.042870861 | 1.20E-34    | 5.18E-33    |
| ENSDARG00000009466 | rgs9bp            | 0.484947414 | -1.04409978  | 3.02E-06    | 1.65E-05    |
| ENSDARG00000087224 | si:ch73-380n15.2  | 0.484618937 | -1.045077315 | 0.018565678 | 0.047715339 |
| ENSDARG00000091573 | CU693477.1        | 0.484522322 | -1.045364963 | 0.002398411 | 0.007766856 |
| ENSDARG00000058462 | zgc:158846        | 0.482939483 | -1.050085678 | 9.73E-39    | 5.01E-37    |
| ENSDARG00000057887 | nts               | 0.482627399 | -1.051018275 | 0.004349593 | 0.013205567 |
| ENSDARG00000041073 | si:dkey-12e7.4    | 0.481377091 | -1.05476061  | 1.66E-09    | 1.36E-08    |
| ENSDARG00000057498 | habp2             | 0.481175867 | -1.055363808 | 9.51E-23    | 2.18E-21    |
| ENSDARG00000042526 | sebox             | 0.480650317 | -1.056940409 | 0.000289056 | 0.001138576 |
| ENSDARG00000075513 | ccdc136b          | 0.480430147 | -1.057601412 | 5.64E-11    | 5.35E-10    |
| ENSDARG00000056248 | wu:fb15e04        | 0.480004675 | -1.058879637 | 1.77E-276   | 2.29E-273   |
| ENSDARG00000075067 | AIPL1             | 0.479994009 | -1.058911697 | 9.64E-08    | 6.45E-07    |
| ENSDARG00000020084 | tg                | 0.479806604 | -1.05947508  | 3.88E-28    | 1.19E-26    |
| ENSDARG00000041883 | MPP7 (2 of 2)     | 0.47972691  | -1.059714727 | 0.004871282 | 0.014591798 |
| ENSDARG00000071364 | si:ch73-329n5.1   | 0.479712389 | -1.059758397 | 2.15E-07    | 1.38E-06    |

|                    |                   |             |              |             |             |
|--------------------|-------------------|-------------|--------------|-------------|-------------|
| ENSDARG00000052289 | CYGB (2 of 3)     | 0.479370223 | -1.0607878   | 3.65E-05    | 0.000169654 |
| ENSDARG00000069186 | cyp27a1.2         | 0.4791135   | -1.061560629 | 8.76E-06    | 4.49E-05    |
| ENSDARG00000090686 | SLC35F2 (2 of 2)  | 0.477876833 | -1.065289265 | 0.003343598 | 0.010429087 |
| ENSDARG00000039535 | dapp1             | 0.477739595 | -1.065703642 | 6.09E-07    | 3.67E-06    |
| ENSDARG00000040732 | elavl2            | 0.477419647 | -1.066670156 | 0.015849374 | 0.041558303 |
| ENSDARG00000095822 | si:dkey-176g4.5   | 0.477166559 | -1.067435157 | 0.000113285 | 0.000482395 |
| ENSDARG00000097544 | si:rp71-1h20.9    | 0.476613005 | -1.069109777 | 0.000125545 | 0.000530071 |
| ENSDARG00000062467 | zgc:162946        | 0.476297086 | -1.070066374 | 1.29E-06    | 7.42E-06    |
| ENSDARG00000079986 | si:ch211-250k18.8 | 0.475287107 | -1.07312883  | 0.004170243 | 0.012726392 |
| ENSDARG00000040928 | CABZ01059391.1    | 0.474791148 | -1.074635056 | 0.012616444 | 0.03396293  |
| ENSDARG00000076848 | LGALS3BP (3 of 3) | 0.474746675 | -1.0747702   | 3.65E-14    | 4.63E-13    |
| ENSDARG00000056909 |                   | 0.474633444 | -1.075114336 | 7.89E-05    | 0.000344842 |
| ENSDARG00000019063 | FAT1 (2 of 2)     | 0.474051225 | -1.076885133 | 1.42E-55    | 1.51E-53    |
| ENSDARG00000051892 | KCNG4 (1 of 2)    | 0.47241979  | -1.081858693 | 0.000336896 | 0.001311181 |
| ENSDARG00000084681 | 5S_rRNA           | 0.472351388 | -1.082067597 | 0.004655028 | 0.014033808 |
| ENSDARG00000089181 | ADAD1             | 0.472207423 | -1.082507373 | 0.009564715 | 0.026524097 |
| ENSDARG00000074075 | antxr1b           | 0.471785949 | -1.083795643 | 5.49E-05    | 0.000247049 |
| ENSDARG00000006341 | tas1r3            | 0.471197963 | -1.085594792 | 0.014155451 | 0.037581921 |
| ENSDARG00000059399 | CR318593.1        | 0.47102992  | -1.086109393 | 0.005203313 | 0.015466629 |
| ENSDARG00000075159 | mfi2              | 0.470844221 | -1.086678273 | 4.81E-20    | 9.25E-19    |
| ENSDARG00000094908 | lingo4a           | 0.469772728 | -1.089965132 | 0.000875415 | 0.003125506 |
| ENSDARG00000092276 |                   | 0.469728379 | -1.090101338 | 1.58E-12    | 1.74E-11    |
| ENSDARG00000058103 | glra4b            | 0.469311954 | -1.091380888 | 2.25E-08    | 1.63E-07    |
| ENSDARG00000088061 | si:dkeyp-72e1.9   | 0.468143462 | -1.094977386 | 1.43E-20    | 2.84E-19    |
| ENSDARG00000010680 | gngt2a            | 0.467272758 | -1.097663165 | 5.37E-24    | 1.32E-22    |
| ENSDARG00000067815 | LINGO3 (2 of 2)   | 0.466609195 | -1.099713358 | 3.81E-06    | 2.05E-05    |
| ENSDARG00000032801 | grk5              | 0.466436632 | -1.100246999 | 1.49E-19    | 2.77E-18    |
| ENSDARG00000089101 | plrdgb            | 0.465816534 | -1.102166248 | 3.46E-06    | 1.88E-05    |
| ENSDARG00000095512 | rca2.2            | 0.465522053 | -1.10307858  | 0.002301883 | 0.007485868 |
| ENSDARG00000074570 | FP016199.1        | 0.464627117 | -1.105854738 | 2.21E-07    | 1.42E-06    |

|                    |                   |             |              |             |             |
|--------------------|-------------------|-------------|--------------|-------------|-------------|
| ENSDARG00000014233 | sept8b            | 0.46433251  | -1.1067698   | 2.00E-17    | 3.21E-16    |
| ENSDARG00000022739 | rxfp3.2a          | 0.463694885 | -1.108752281 | 0.000233764 | 0.00093717  |
| ENSDARG00000090366 | zgc:171626        | 0.462735713 | -1.111739648 | 0.002413195 | 0.007809386 |
| ENSDARG00000057029 | htr2a             | 0.462369319 | -1.112882426 | 8.84E-07    | 5.21E-06    |
| ENSDARG00000093753 | si:ch211-133l5.5  | 0.461640413 | -1.11515857  | 6.71E-10    | 5.74E-09    |
| ENSDARG00000011929 | plp1b             | 0.460791814 | -1.117813008 | 1.29E-09    | 1.07E-08    |
| ENSDARG00000088912 | si:ch211-117l17.6 | 0.460080287 | -1.120042451 | 3.26E-07    | 2.04E-06    |
| ENSDARG00000069758 | RBM44             | 0.459306824 | -1.122469878 | 0.000145969 | 0.000609383 |
| ENSDARG00000093224 | si:ch211-157h7.1  | 0.458985485 | -1.123479565 | 0.000197215 | 0.000802748 |
| ENSDARG00000078970 | il7r              | 0.45874141  | -1.124246951 | 0.006485913 | 0.01879491  |
| ENSDARG00000070078 | abcb11b           | 0.458379509 | -1.125385544 | 6.20E-07    | 3.73E-06    |
| ENSDARG00000029112 | gem               | 0.458207345 | -1.125927511 | 5.98E-14    | 7.40E-13    |
| ENSDARG00000021369 | mc3r              | 0.457686923 | -1.127567024 | 0.007238547 | 0.020724118 |
| ENSDARG00000043847 | tmem244           | 0.457311066 | -1.128752264 | 2.29E-09    | 1.85E-08    |
| ENSDARG00000087407 | si:ch73-304f21.1  | 0.457280863 | -1.128847549 | 5.91E-11    | 5.61E-10    |
| ENSDARG00000078411 | hspb15            | 0.457132438 | -1.129315899 | 1.85E-12    | 2.03E-11    |
| ENSDARG00000087873 | si:ch211-170n20.3 | 0.455987857 | -1.132932688 | 1.15E-57    | 1.33E-55    |
| ENSDARG00000041086 | CABZ01071177.1    | 0.455883201 | -1.133263848 | 0.001646459 | 0.005532508 |
| ENSDARG00000021573 | slc16a7           | 0.455607522 | -1.134136529 | 0.000149698 | 0.000623117 |
| ENSDARG00000080531 | SNORD31           | 0.453897004 | -1.139563128 | 0.004404174 | 0.013355563 |
| ENSDARG00000054543 | samsn1a           | 0.453483689 | -1.140877434 | 9.39E-54    | 9.45E-52    |
| ENSDARG00000078276 | COLGALT1 (3 of 3) | 0.453428008 | -1.141054586 | 2.51E-80    | 5.43E-78    |
| ENSDARG00000070960 | si:ch211-288g17.4 | 0.452966576 | -1.142523495 | 0.005441785 | 0.016064442 |
| ENSDARG00000075929 |                   | 0.452558114 | -1.143825032 | 0.00331201  | 0.010337376 |
| ENSDARG00000087359 | c3b               | 0.45246547  | -1.144120398 | 0.001242756 | 0.004278795 |
| ENSDARG00000074601 | cbln2a            | 0.451838574 | -1.146120655 | 4.05E-05    | 0.000186537 |
| ENSDARG00000004358 | gnb3a             | 0.450798179 | -1.149446408 | 8.30E-189   | 6.04E-186   |
| ENSDARG00000095217 | MYH13 (10 of 11)  | 0.450730022 | -1.149664547 | 4.00E-34    | 1.67E-32    |
| ENSDARG00000090729 | and4              | 0.45036407  | -1.150836361 | 1.99E-67    | 3.02E-65    |
| ENSDARG00000076824 | CCKBR (2 of 2)    | 0.450332126 | -1.150938693 | 0.002025843 | 0.00666221  |

|                    |                    |             |              |             |             |
|--------------------|--------------------|-------------|--------------|-------------|-------------|
| ENSDARG00000016213 | BX088711.1         | 0.450148852 | -1.151525955 | 4.22E-08    | 2.94E-07    |
| ENSDARG00000055053 | CR558302.3         | 0.449698791 | -1.15296909  | 2.40E-15    | 3.33E-14    |
| ENSDARG00000023151 | ucp1               | 0.449666735 | -1.153071934 | 2.78E-177   | 1.80E-174   |
| ENSDARG00000091607 | ARHGEF28 (2 of 2)  | 0.449572449 | -1.153374467 | 5.32E-05    | 0.000239747 |
| ENSDARG00000019949 | serpinh1b          | 0.449413456 | -1.153884772 | 0           | 0           |
| ENSDARG00000092419 | vtg7               | 0.448588513 | -1.156535417 | 4.48E-09    | 3.52E-08    |
| ENSDARG00000062712 | si:dkey-236e20.7   | 0.447946887 | -1.158600411 | 1.91E-06    | 1.08E-05    |
| ENSDARG00000030750 | gabrr3b            | 0.446464039 | -1.163384118 | 1.32E-08    | 9.79E-08    |
| ENSDARG00000005966 | slc4a5             | 0.44644021  | -1.16346112  | 4.54E-12    | 4.80E-11    |
| ENSDARG00000041414 | bmf2               | 0.445159686 | -1.167605149 | 2.29E-17    | 3.67E-16    |
| ENSDARG00000092792 | zgc:92658          | 0.445112759 | -1.167757239 | 2.60E-09    | 2.10E-08    |
| ENSDARG00000039964 | fgfbp2a            | 0.444568748 | -1.169521562 | 8.71E-20    | 1.65E-18    |
| ENSDARG00000037646 | rgs11              | 0.444480581 | -1.169807705 | 2.46E-21    | 5.13E-20    |
| ENSDARG00000088737 | BX005423.3         | 0.44447275  | -1.169833123 | 0.006051287 | 0.017681668 |
| ENSDARG00000032553 | egl3               | 0.443106289 | -1.174275292 | 2.35E-43    | 1.48E-41    |
| ENSDARG00000041382 | si:dkey-283b15.2   | 0.443062658 | -1.174417356 | 1.23E-48    | 9.96E-47    |
| ENSDARG00000086603 | FUT9 (15 of 16)    | 0.442974341 | -1.174704962 | 0.002248834 | 0.007329303 |
| ENSDARG00000087963 | BX927130.1         | 0.442490818 | -1.176280575 | 5.41E-09    | 4.21E-08    |
| ENSDARG00000094095 | si:ch211-149k23.10 | 0.442215212 | -1.177179441 | 0.00225157  | 0.007336536 |
| ENSDARG00000095831 | si:ch211-175f12.2  | 0.441673233 | -1.178948693 | 9.25E-09    | 7.01E-08    |
| ENSDARG00000079302 | and2               | 0.441143208 | -1.180681023 | 0           | 0           |
| ENSDARG00000092574 | si:ch211-198d23.1  | 0.440442532 | -1.182974303 | 0.000244657 | 0.000976428 |
| ENSDARG00000079703 | si:dkey-18p12.4    | 0.440209697 | -1.183737171 | 3.23E-08    | 2.29E-07    |
| ENSDARG00000094147 | si:rp71-7l19.6     | 0.4400703   | -1.184194085 | 0.007461317 | 0.021288906 |
| ENSDARG00000058410 | acbd5b             | 0.440064355 | -1.184213577 | 5.94E-05    | 0.00026577  |
| ENSDARG00000027799 | ucmaa              | 0.439909775 | -1.184720437 | 0.004521254 | 0.013679915 |
| ENSDARG00000014805 | fhl5               | 0.439762717 | -1.185202796 | 4.87E-07    | 2.98E-06    |
| ENSDARG00000068961 | APEX2 (2 of 2)     | 0.438803963 | -1.18835154  | 0.001686607 | 0.005654696 |
| ENSDARG00000027495 | elovl4b            | 0.438219531 | -1.190274311 | 2.74E-110   | 1.07E-107   |
| ENSDARG00000084796 | 5S_rRNA            | 0.43814802  | -1.190509756 | 0.000296055 | 0.001163881 |

|                    |                    |             |              |             |             |
|--------------------|--------------------|-------------|--------------|-------------|-------------|
| ENSDARG00000071657 | si:dkey-19a16.4    | 0.436922792 | -1.194549729 | 7.82E-05    | 0.000342218 |
| ENSDARG00000092823 | si:dkeyp-67a8.4    | 0.435856021 | -1.198076457 | 0.00168821  | 0.0056594   |
| ENSDARG00000012504 | rlbp1a             | 0.434696881 | -1.201918352 | 8.99E-89    | 2.26E-86    |
| ENSDARG00000086969 | CR774179.1         | 0.434418312 | -1.202843178 | 7.72E-07    | 4.59E-06    |
| ENSDARG00000074772 | ccl-c11b           | 0.434349154 | -1.203072866 | 3.74E-15    | 5.10E-14    |
| ENSDARG00000076706 | CABZ01038708.1     | 0.433963276 | -1.204355136 | 0.004534715 | 0.013717717 |
| ENSDARG00000090676 |                    | 0.433803489 | -1.20488644  | 0.007485725 | 0.021343528 |
| ENSDARG00000017314 | CELA1 (1 of 7)     | 0.433299328 | -1.206564095 | 1.33E-06    | 7.64E-06    |
| ENSDARG00000012126 | zgc:109965         | 0.431676504 | -1.211977525 | 2.24E-50    | 1.96E-48    |
| ENSDARG00000087905 | SLC39A8 (2 of 2)   | 0.430725398 | -1.215159699 | 0.004540439 | 0.013732106 |
| ENSDARG00000052582 | si:ch211-131e11.14 | 0.430463562 | -1.216036975 | 0.00125926  | 0.004330889 |
| ENSDARG00000037507 | kctd12b            | 0.430070707 | -1.217354224 | 1.75E-10    | 1.59E-09    |
| ENSDARG00000095002 | TNNC2 (2 of 2)     | 0.42966348  | -1.218720936 | 5.56E-17    | 8.63E-16    |
| ENSDARG00000026855 | cacna2d4a          | 0.429176447 | -1.220357192 | 2.04E-18    | 3.53E-17    |
| ENSDARG00000078647 | samsn1b            | 0.427475103 | -1.226087697 | 0.005012517 | 0.014974768 |
| ENSDARG00000002576 | cabp5a             | 0.426473993 | -1.229470328 | 0.002057255 | 0.006756899 |
| ENSDARG00000087551 | BX323793.2         | 0.425797245 | -1.231761481 | 3.33E-09    | 2.65E-08    |
| ENSDARG00000086640 |                    | 0.425744431 | -1.231940437 | 0.000222478 | 0.00089572  |
| ENSDARG00000075837 | si:dkey-1d7.3      | 0.425686114 | -1.232138066 | 1.62E-21    | 3.40E-20    |
| ENSDARG00000045442 | cpb1               | 0.425096678 | -1.234137111 | 1.34E-21    | 2.84E-20    |
| ENSDARG00000088491 | CABZ01103847.1     | 0.424774458 | -1.235231076 | 2.32E-05    | 0.000111633 |
| ENSDARG00000056411 | adipoqb            | 0.424021    | -1.237792377 | 0.001388236 | 0.004730902 |
| ENSDARG00000088432 | si:dkey-162h11.3   | 0.423934686 | -1.238086085 | 1.79E-17    | 2.90E-16    |
| ENSDARG00000089319 | CU464087.2         | 0.423103057 | -1.240918984 | 0.000243462 | 0.000972476 |
| ENSDARG00000056910 | NFASC (1 of 2)     | 0.422875317 | -1.241695741 | 6.15E-21    | 1.25E-19    |
| ENSDARG00000090526 | PLEKHS1 (3 of 4)   | 0.422797028 | -1.241962859 | 1.13E-31    | 4.07E-30    |
| ENSDARG00000029898 | CNGA1 (2 of 2)     | 0.422341454 | -1.243518237 | 3.27E-06    | 1.78E-05    |
| ENSDARG00000076900 | PROZ (2 of 2)      | 0.422055983 | -1.244493718 | 0.000243627 | 0.000972999 |
| ENSDARG00000088075 | GRAMD3             | 0.421510188 | -1.246360593 | 6.66E-09    | 5.14E-08    |
| ENSDARG00000076852 | CABZ01113374.2     | 0.421085319 | -1.247815516 | 3.06E-15    | 4.20E-14    |

|                    |                  |             |              |             |             |
|--------------------|------------------|-------------|--------------|-------------|-------------|
| ENSDARG00000055463 | Irit3a           | 0.420859595 | -1.248589087 | 3.86E-06    | 2.08E-05    |
| ENSDARG00000076820 | xkr8.2           | 0.420385095 | -1.250216577 | 1.54E-13    | 1.85E-12    |
| ENSDARG00000036186 | mbpa             | 0.420117159 | -1.251136385 | 1.39E-27    | 4.15E-26    |
| ENSDARG00000093518 | si:ch73-186j5.4  | 0.419936967 | -1.251755302 | 1.89E-07    | 1.22E-06    |
| ENSDARG00000028343 | zgc:101560       | 0.419653114 | -1.252730809 | 2.67E-06    | 1.47E-05    |
| ENSDARG00000026990 | klhl6            | 0.419407131 | -1.253576703 | 4.44E-05    | 0.000203206 |
| ENSDARG00000092151 | si:dkey-40i22.5  | 0.418301674 | -1.257384323 | 0.000244456 | 0.000975762 |
| ENSDARG00000091739 | GPC6 (3 of 3)    | 0.416956397 | -1.262031573 | 7.71E-05    | 0.000337862 |
| ENSDARG00000052016 | cabp2a           | 0.416751954 | -1.26273913  | 1.54E-07    | 1.00E-06    |
| ENSDARG00000091428 |                  | 0.416659962 | -1.263057619 | 2.43E-09    | 1.96E-08    |
| ENSDARG00000079347 | zgc:194659       | 0.415564449 | -1.266855857 | 6.23E-17    | 9.63E-16    |
| ENSDARG00000071709 | CT971495.1       | 0.415234344 | -1.26800232  | 6.78E-12    | 7.05E-11    |
| ENSDARG00000090130 | LRIF1 (2 of 2)   | 0.413911191 | -1.27260684  | 3.37E-21    | 6.96E-20    |
| ENSDARG00000071319 | narf             | 0.413728267 | -1.273244565 | 3.81E-43    | 2.35E-41    |
| ENSDARG00000095595 | si:ch73-272h24.1 | 0.413695162 | -1.273360009 | 3.25E-07    | 2.03E-06    |
| ENSDARG00000051981 | STX3 (2 of 2)    | 0.412820213 | -1.276414482 | 1.68E-51    | 1.54E-49    |
| ENSDARG00000078241 | MAP7 (2 of 2)    | 0.412597807 | -1.277191943 | 1.27E-06    | 7.32E-06    |
| ENSDARG00000062906 | kcnv2b           | 0.411891784 | -1.279662745 | 9.15E-11    | 8.50E-10    |
| ENSDARG00000021065 | camk2b2          | 0.41080244  | -1.283483343 | 8.07E-09    | 6.16E-08    |
| ENSDARG00000094533 | si:dkey-246e1.3  | 0.410530557 | -1.284438486 | 9.16E-05    | 0.000396108 |
| ENSDARG00000087810 | CABZ01088935.1   | 0.409644644 | -1.287555144 | 0.000146301 | 0.000610499 |
| ENSDARG00000023181 | pcp4l1           | 0.409042494 | -1.289677369 | 6.43E-40    | 3.50E-38    |
| ENSDARG00000074683 | CABZ01048960.1   | 0.408452451 | -1.291759955 | 2.53E-06    | 1.40E-05    |
| ENSDARG00000079190 | sycp2l           | 0.407597705 | -1.294782167 | 0.004497278 | 0.013613176 |
| ENSDARG00000094132 | igf1             | 0.407563327 | -1.294903852 | 5.24E-14    | 6.51E-13    |
| ENSDARG00000075270 | si:ch211-233g6.8 | 0.407265277 | -1.295959278 | 2.15E-104   | 7.25E-102   |
| ENSDARG00000004445 | GRM5 (1 of 2)    | 0.406309245 | -1.299349905 | 1.04E-13    | 1.26E-12    |
| ENSDARG00000053746 | OSBPL1A (2 of 2) | 0.4059925   | -1.300475018 | 2.01E-12    | 2.19E-11    |
| ENSDARG00000026248 | slc1a7b          | 0.405877219 | -1.300884729 | 2.54E-06    | 1.40E-05    |
| ENSDARG00000057262 |                  | 0.405437952 | -1.302446951 | 1.12E-12    | 1.25E-11    |



|                     |                  |             |              |             |             |
|---------------------|------------------|-------------|--------------|-------------|-------------|
| ENSDARG00000086615  | si:dkey-196n19.1 | 0.404745106 | -1.304914458 | 0.000831737 | 0.002984571 |
| ENSDARG00000024032  | coch             | 0.403758739 | -1.308434607 | 5.31E-12    | 5.57E-11    |
| ENSDARG00000070511  | CR933820.2       | 0.403427262 | -1.309619516 | 3.24E-22    | 7.14E-21    |
| ENSDARG00000002898  | DGKA (1 of 2)    | 0.40293059  | -1.311396757 | 1.44E-10    | 1.32E-09    |
| ENSDARG000000042993 | try              | 0.402833521 | -1.311744355 | 8.80E-27    | 2.51E-25    |
| ENSDARG00000073820  | zgc:174917       | 0.401367325 | -1.317004921 | 7.84E-15    | 1.05E-13    |
| ENSDARG00000094766  | CCBL2 (4 of 4)   | 0.40128635  | -1.317296012 | 6.80E-05    | 0.000301249 |
| ENSDARG00000052057  | PCOLCE (1 of 2)  | 0.401263126 | -1.317379508 | 4.47E-39    | 2.35E-37    |
| ENSDARG00000014039  | TDRD15           | 0.401112658 | -1.317920599 | 1.51E-09    | 1.24E-08    |
| ENSDARG00000043003  | pcyt2            | 0.401090427 | -1.31800056  | 3.84E-225   | 4.36E-222   |
| ENSDARG00000037390  | gsg1l            | 0.400993347 | -1.318349794 | 1.30E-06    | 7.46E-06    |
| ENSDARG00000091024  | pparab           | 0.400826487 | -1.318950249 | 0.000172764 | 0.000710583 |
| ENSDARG00000042722  | blnk             | 0.400470329 | -1.320232739 | 0.000561018 | 0.002088111 |
| ENSDARG00000057678  | sfrp1b           | 0.400062118 | -1.321704069 | 7.74E-30    | 2.59E-28    |
| ENSDARG00000069827  | crygm2d11        | 0.399712406 | -1.322965744 | 8.36E-159   | 4.94E-156   |
| ENSDARG00000086669  | edn3b            | 0.397328967 | -1.331594119 | 0.004939412 | 0.014779705 |
| ENSDARG00000091492  | LOXL2 (3 of 3)   | 0.397208361 | -1.332032103 | 7.56E-52    | 7.08E-50    |
| ENSDARG00000060350  | APOD (3 of 3)    | 0.395825119 | -1.337064925 | 1.10E-31    | 3.98E-30    |
| ENSDARG00000086564  | AL935184.1       | 0.395802404 | -1.337147719 | 9.87E-17    | 1.50E-15    |
| ENSDARG00000007024  | uox              | 0.395777869 | -1.337237154 | 3.69E-29    | 1.19E-27    |
| ENSDARG00000010958  | glmnb            | 0.395649819 | -1.337703997 | 4.09E-31    | 1.44E-29    |
| ENSDARG00000027852  | plekhf1          | 0.395563468 | -1.3380189   | 2.23E-45    | 1.56E-43    |
| ENSDARG00000071076  | ldhbb            | 0.394322836 | -1.342550831 | 1.66E-26    | 4.63E-25    |
| ENSDARG00000059416  | EGFLAM           | 0.394153127 | -1.343171873 | 1.72E-19    | 3.18E-18    |
| ENSDARG00000032838  | si:dkey-206f10.1 | 0.393504806 | -1.345546839 | 5.10E-20    | 9.79E-19    |
| ENSDARG00000030215  | matn1            | 0.39220258  | -1.350329067 | 0           | 0           |
| ENSDARG00000091137  | CABZ01079258.1   | 0.391614254 | -1.352494817 | 5.84E-05    | 0.000261449 |
| ENSDARG00000077708  | snx8b            | 0.391140301 | -1.354241904 | 6.30E-05    | 0.000280433 |
| ENSDARG00000070724  | chrna4b          | 0.390893358 | -1.355153023 | 0.00018838  | 0.000769903 |
| ENSDARG00000016480  | slc17a7          | 0.390298978 | -1.357348411 | 1.46E-20    | 2.89E-19    |

|                    |                   |             |              |             |             |
|--------------------|-------------------|-------------|--------------|-------------|-------------|
| ENSDARG00000044973 |                   | 0.390018015 | -1.358387332 | 0.000446022 | 0.001696352 |
| ENSDARG00000026017 | xpnpep2           | 0.389451732 | -1.360483561 | 7.92E-11    | 7.39E-10    |
| ENSDARG00000069017 | elnb              | 0.389404433 | -1.360658786 | 2.43E-73    | 4.40E-71    |
| ENSDARG00000097930 | si:ch211-161c3.6  | 0.389369667 | -1.360787596 | 1.17E-44    | 7.93E-43    |
| ENSDARG00000093608 | si:dkey-25o1.6    | 0.389307532 | -1.361017839 | 8.76E-12    | 8.99E-11    |
| ENSDARG00000078617 | CABZ01048958.1    | 0.389152457 | -1.361592627 | 1.09E-07    | 7.25E-07    |
| ENSDARG00000087431 | zgc:173962        | 0.388823196 | -1.362813806 | 2.55E-06    | 1.41E-05    |
| ENSDARG00000062077 | acsbg1            | 0.388718487 | -1.363202373 | 2.47E-07    | 1.57E-06    |
| ENSDARG00000074696 | zgc:194621        | 0.388157255 | -1.365286842 | 5.63E-07    | 3.41E-06    |
| ENSDARG00000070011 | ASTL (9 of 9)     | 0.38753709  | -1.367593701 | 4.12E-07    | 2.55E-06    |
| ENSDARG00000079443 |                   | 0.384750823 | -1.378003682 | 4.19E-10    | 3.65E-09    |
| ENSDARG00000093936 | si:dkeyp-1h4.6    | 0.384323571 | -1.379606633 | 3.55E-24    | 8.82E-23    |
| ENSDARG00000088839 | BX248120.1        | 0.38357143  | -1.382432828 | 9.36E-07    | 5.49E-06    |
| ENSDARG00000074887 | CT583723.1        | 0.383230823 | -1.383714495 | 8.79E-07    | 5.19E-06    |
| ENSDARG00000094331 | si:dkey-189n19.3  | 0.383021112 | -1.384504181 | 6.70E-06    | 3.49E-05    |
| ENSDARG00000053068 | cyp8b1            | 0.381454605 | -1.390416715 | 4.52E-18    | 7.62E-17    |
| ENSDARG00000078912 | si:ch73-24k9.2    | 0.38067334  | -1.393374559 | 1.35E-05    | 6.74E-05    |
| ENSDARG00000076055 | RPGRIP1           | 0.378408999 | -1.401981699 | 9.08E-52    | 8.48E-50    |
| ENSDARG00000077187 | impg1a            | 0.378323236 | -1.402308709 | 1.22E-11    | 1.24E-10    |
| ENSDARG00000040274 | SCAMP5 (2 of 2)   | 0.378143046 | -1.402996006 | 1.77E-32    | 6.68E-31    |
| ENSDARG00000095328 | si:ch211-191i18.4 | 0.377557701 | -1.40523095  | 0.001729146 | 0.005781777 |
| ENSDARG00000003326 | cacng5a           | 0.377025589 | -1.407265651 | 6.47E-07    | 3.89E-06    |
| ENSDARG00000089111 |                   | 0.375932959 | -1.411452689 | 0.001862717 | 0.00617656  |
| ENSDARG00000090320 | MSLN (2 of 2)     | 0.375143932 | -1.414483872 | 3.20E-46    | 2.33E-44    |
| ENSDARG00000034007 | prom1b            | 0.374449353 | -1.417157497 | 4.29E-152   | 2.44E-149   |
| ENSDARG00000056771 | cfhl1             | 0.37395149  | -1.419076962 | 4.05E-14    | 5.10E-13    |
| ENSDARG00000058023 | si:dkey-11o15.4   | 0.373834027 | -1.419530202 | 5.28E-08    | 3.65E-07    |
| ENSDARG00000076371 | SHROOM2 (1 of 2)  | 0.373677798 | -1.420133248 | 9.60E-69    | 1.54E-66    |
| ENSDARG00000070858 | si:busm1-105l16.2 | 0.373133864 | -1.422234798 | 1.13E-05    | 5.67E-05    |
| ENSDARG00000093893 | CCBL2 (3 of 4)    | 0.372706833 | -1.423886827 | 0.001244361 | 0.004283801 |

|                    |                  |                   |              |             |             |
|--------------------|------------------|-------------------|--------------|-------------|-------------|
| ENSDARG00000040004 | PKHD1L1 (1 of 2) | 0.371770951       | -1.427514049 | 0.000521939 | 0.001954192 |
| ENSDARG00000057209 | lppr5a           | 0.371583737       | -1.428240735 | 5.42E-13    | 6.19E-12    |
| ENSDARG00000070602 | CU457778.1       | 0.37115838        | -1.429893152 | 1.66E-05    | 8.15E-05    |
| ENSDARG00000059824 | soat2            | 0.370608391       | -1.432032551 | 1.49E-59    | 1.84E-57    |
| ENSDARG00000007788 | atp2b1b          | 0.370528566       | -1.432343322 | 2.89E-147   | 1.52E-144   |
| ENSDARG00000070492 | fgf21            | 0.370457253       | -1.432621016 | 0.000834028 | 0.002991104 |
| ENSDARG00000089208 | CABZ01055343.4   | 0.369403091       | -1.436732155 | 4.20E-19    | 7.59E-18    |
| ENSDARG00000034940 | slc1a7a          | 0.369176753       | -1.437616383 | 7.63E-15    | 1.02E-13    |
| ENSDARG00000011886 | pdca             | 0.368787672       | -1.439137667 | 1.37E-17    | 2.24E-16    |
| ENSDARG00000086260 | CABZ01052573.1   | 0.368657733       | -1.439646075 | 3.47E-19    | 6.31E-18    |
| ENSDARG00000057338 | gstp2            | 0.367296282       | -1.444983802 | 3.69E-19    | 6.69E-18    |
| ENSDARG00000036159 | trhrb            | 0.367032525       | -1.446020179 | 0.000893086 | 0.003181793 |
| ENSDARG00000037337 | cnrip1b          | 0.3668986         | -1.446546696 | 9.33E-42    | 5.46E-40    |
| ENSDARG00000079078 | hbaa1            | 0.366401573       | -1.448502397 | 0.001248901 | 0.004297868 |
| ENSDARG00000039444 | FAIM2            | 0.365920221       | -1.450398955 | 5.24E-35    | 2.30E-33    |
| ENSDARG00000068551 | zgc:153394       | 0.365251913       | -1.453036264 | 1.92E-11    | 1.90E-10    |
| ENSDARG00000044684 | rbp4l            | 0.365120735       | -1.453554493 | 0.000893462 | 0.003182733 |
| ENSDARG00000070116 | nit1             | 0.363261475       | -1.460919725 | 0.000402937 | 0.001545955 |
| ENSDARG00000004721 | mpp5b            | 0.363063061       | -1.46170794  | 2.97E-07    | 1.87E-06    |
| ENSDARG00000054667 | adra2db          | 0.362873211       | -1.462462542 | 1.77E-05    | 8.64E-05    |
| ENSDARG00000071450 | tdrd5            | 0.36196448        | -1.466079965 | 9.14E-06    | 4.67E-05    |
| ENSDARG00000037487 |                  | 1-Mar 0.360647167 | -1.471340005 | 5.82E-10    | 5.01E-09    |
| ENSDARG00000015404 | arl3l2           | 0.360579787       | -1.471609569 | 9.36E-18    | 1.55E-16    |
| ENSDARG00000038363 | drd4a            | 0.359613864       | -1.475479454 | 9.66E-08    | 6.47E-07    |
| ENSDARG00000096207 | SRR (2 of 2)     | 0.358416531       | -1.480290915 | 1.77E-09    | 1.45E-08    |
| ENSDARG00000090562 | tmprss3a         | 0.357847277       | -1.482584094 | 0.001338946 | 0.004576666 |
| ENSDARG00000031013 | C1QL1 (2 of 2)   | 0.357541447       | -1.483817602 | 0.001338391 | 0.00457532  |
| ENSDARG00000058803 | grk1a            | 0.355462894       | -1.492229126 | 1.51E-20    | 2.99E-19    |
| ENSDARG00000086756 | RGS9BP           | 0.354470075       | -1.496264256 | 3.01E-27    | 8.86E-26    |
| ENSDARG00000093342 | si:ch211-13f8.1  | 0.353633414       | -1.499673499 | 8.57E-12    | 8.81E-11    |

|                    |                    |             |              |             |             |
|--------------------|--------------------|-------------|--------------|-------------|-------------|
| ENSDARG00000002585 |                    | 0.351237725 | -1.509480287 | 4.88E-13    | 5.61E-12    |
| ENSDARG00000078132 | si:dkey-7e14.7     | 0.350070687 | -1.514281833 | 3.67E-19    | 6.66E-18    |
| ENSDARG00000088638 | si:dkey-188p4.1    | 0.349531327 | -1.51650633  | 6.37E-05    | 0.000283302 |
| ENSDARG00000007382 | ubtd1a             | 0.349434903 | -1.516904378 | 2.32E-25    | 6.13E-24    |
| ENSDARG00000061945 | cngb3              | 0.348519586 | -1.520688362 | 0.000139167 | 0.000583645 |
| ENSDARG00000037159 | opr1b              | 0.347551181 | -1.524702647 | 1.47E-09    | 1.21E-08    |
| ENSDARG00000077479 | MSH5               | 0.347480422 | -1.524996398 | 1.42E-05    | 7.06E-05    |
| ENSDARG00000074011 | FAM196A (1 of 3)   | 0.345855126 | -1.531760257 | 0.001514603 | 0.005127682 |
| ENSDARG00000074821 | NLRP6 (12 of 145)  | 0.344742785 | -1.536407736 | 0.000679242 | 0.002483204 |
| ENSDARG00000019772 | C2                 | 0.344060166 | -1.539267224 | 1.18E-07    | 7.80E-07    |
| ENSDARG00000078272 | CABP7 (2 of 2)     | 0.340214093 | -1.55548519  | 2.05E-08    | 1.49E-07    |
| ENSDARG00000014745 | epd                | 0.340139914 | -1.555799785 | 1.25E-46    | 9.29E-45    |
| ENSDARG00000021336 | pax4               | 0.339100852 | -1.560213684 | 1.23E-07    | 8.14E-07    |
| ENSDARG00000079227 | plekhs1            | 0.336384137 | -1.571818421 | 3.25E-05    | 0.000152376 |
| ENSDARG00000087857 | si:ch211-180a12.2  | 0.334958431 | -1.577946029 | 3.48E-29    | 1.13E-27    |
| ENSDARG00000062661 | abca4b             | 0.333760199 | -1.583116171 | 1.17E-87    | 2.84E-85    |
| ENSDARG00000058841 | ugt2b6             | 0.333545757 | -1.584043404 | 2.76E-24    | 6.93E-23    |
| ENSDARG00000062228 | adipoqa            | 0.333275302 | -1.585213687 | 7.58E-06    | 3.92E-05    |
| ENSDARG00000094708 | sftpba             | 0.332978375 | -1.586499611 | 5.01E-09    | 3.92E-08    |
| ENSDARG00000089063 | lactbl1a           | 0.332897752 | -1.586848965 | 2.10E-27    | 6.22E-26    |
| ENSDARG00000018263 | pdia2              | 0.332701573 | -1.58769941  | 4.10E-32    | 1.52E-30    |
| ENSDARG00000031534 | TRIM35 (8 of 43)   | 0.33232002  | -1.589354889 | 3.67E-06    | 1.98E-05    |
| ENSDARG00000077542 | si:dkeyp-75b4.8    | 0.332317808 | -1.589364489 | 0.001070353 | 0.003744256 |
| ENSDARG00000090391 | ugt2b3             | 0.332150176 | -1.590092416 | 3.06E-24    | 7.67E-23    |
| ENSDARG00000030980 | csrp1b             | 0.330612274 | -1.596787807 | 2.47E-09    | 1.99E-08    |
| ENSDARG00000056603 | mcf2b              | 0.33021567  | -1.598519514 | 1.56E-08    | 1.15E-07    |
| ENSDARG00000089587 | CR450785.2         | 0.329403065 | -1.602074118 | 5.36E-06    | 2.84E-05    |
| ENSDARG00000097079 | C6H3orf18 (2 of 2) | 0.328803966 | -1.604700393 | 1.74E-15    | 2.42E-14    |
| ENSDARG00000091504 | CABZ01117756.1     | 0.328791858 | -1.604753521 | 0.000502009 | 0.001886287 |
| ENSDARG00000043466 | kcnk3              | 0.328204531 | -1.607332937 | 0.000338889 | 0.001318396 |

|                    |                   |             |              |             |             |
|--------------------|-------------------|-------------|--------------|-------------|-------------|
| ENSDARG00000095553 | lenep             | 0.32748472  | -1.610500501 | 6.67E-08    | 4.54E-07    |
| ENSDARG00000076717 | prpf4             | 0.327059116 | -1.612376666 | 6.16E-16    | 8.92E-15    |
| ENSDARG00000040177 | rgs16             | 0.326927572 | -1.612957042 | 6.64E-21    | 1.34E-19    |
| ENSDARG00000089439 | TMEM132A          | 0.326743568 | -1.613769257 | 2.57E-15    | 3.55E-14    |
| ENSDARG00000075295 | tulp1a            | 0.325970475 | -1.617186798 | 5.68E-71    | 9.60E-69    |
| ENSDARG00000070467 | lactbl1b          | 0.324817833 | -1.622297256 | 4.45E-16    | 6.50E-15    |
| ENSDARG00000001993 | myhb              | 0.324471877 | -1.623834653 | 0           | 0           |
| ENSDARG00000052575 | arl13a            | 0.323596489 | -1.627732142 | 1.89E-50    | 1.66E-48    |
| ENSDARG00000096398 | si:ch211-276a17.5 | 0.323499177 | -1.628166052 | 1.86E-15    | 2.60E-14    |
| ENSDARG00000078832 | si:dkey-73p2.4    | 0.323412002 | -1.628554876 | 3.71E-09    | 2.94E-08    |
| ENSDARG00000038894 | tmx3              | 0.321619979 | -1.636571063 | 1.26E-59    | 1.56E-57    |
| ENSDARG00000034107 | actl6b            | 0.320358069 | -1.642242764 | 3.07E-12    | 3.30E-11    |
| ENSDARG00000094557 | nupr1             | 0.319772228 | -1.644883213 | 3.52E-107   | 1.27E-104   |
| ENSDARG00000036304 | CABZ01055343.1    | 0.319395151 | -1.646585687 | 2.09E-07    | 1.34E-06    |
| ENSDARG00000088475 | pcdh1gb9          | 0.319120819 | -1.647825362 | 1.15E-08    | 8.61E-08    |
| ENSDARG00000067798 | ppapdc1a          | 0.318668396 | -1.649872148 | 1.73E-05    | 8.50E-05    |
| ENSDARG00000059173 | gdf2              | 0.31863299  | -1.65003245  | 0.000165708 | 0.000683939 |
| ENSDARG00000057790 | ankrd6a           | 0.316982474 | -1.657525018 | 1.66E-16    | 2.50E-15    |
| ENSDARG00000089972 | CR735107.1        | 0.315061085 | -1.666296525 | 4.65E-14    | 5.82E-13    |
| ENSDARG00000073948 | prok1             | 0.314224576 | -1.670132075 | 1.88E-06    | 1.06E-05    |
| ENSDARG00000056876 | si:dkey-43b14.9   | 0.314217484 | -1.670164638 | 3.72E-05    | 0.000172781 |
| ENSDARG00000052779 | zgc:153932        | 0.313730131 | -1.672404    | 1.36E-09    | 1.12E-08    |
| ENSDARG00000055313 | slc12a10.1        | 0.312289379 | -1.679044592 | 0.000777305 | 0.00280593  |
| ENSDARG00000036140 |                   | 0.312022989 | -1.68027577  | 1.06E-59    | 1.32E-57    |
| ENSDARG00000094118 | si:dkey-21o22.2   | 0.311996538 | -1.680398076 | 9.25E-07    | 5.44E-06    |
| ENSDARG00000061920 | NPAS4 (2 of 3)    | 0.311950342 | -1.680611702 | 0.000523834 | 0.001960252 |
| ENSDARG00000053845 | cbln14            | 0.311330226 | -1.683482446 | 2.75E-06    | 1.51E-05    |
| ENSDARG00000093467 | MYH13 (9 of 11)   | 0.30998747  | -1.689718194 | 3.50E-151   | 1.95E-148   |
| ENSDARG00000078461 | pde6c             | 0.309677017 | -1.691163779 | 4.93E-41    | 2.81E-39    |
| ENSDARG00000077945 | HEPACAM (2 of 2)  | 0.308355106 | -1.69733536  | 0.000363536 | 0.001407723 |

|                    |                   |             |              |             |             |
|--------------------|-------------------|-------------|--------------|-------------|-------------|
| ENSDARG00000076698 | si:dkey-83h2.2    | 0.308130818 | -1.698385112 | 1.78E-05    | 8.71E-05    |
| ENSDARG00000028846 | arl3l1            | 0.308004734 | -1.698975568 | 1.66E-51    | 1.52E-49    |
| ENSDARG00000045164 | nptx2b            | 0.306866375 | -1.704317523 | 0.000251144 | 0.000999926 |
| ENSDARG00000060017 | CLEC3A            | 0.30668198  | -1.705184696 | 2.60E-20    | 5.10E-19    |
| ENSDARG00000018478 | agxtb             | 0.305953856 | -1.708614013 | 1.73E-79    | 3.67E-77    |
| ENSDARG00000091028 | si:ch211-210m1.2  | 0.304791205 | -1.714106823 | 1.51E-07    | 9.83E-07    |
| ENSDARG00000042293 | ca4b              | 0.303458636 | -1.720428215 | 9.68E-10    | 8.14E-09    |
| ENSDARG00000090744 | CABZ01089777.1    | 0.302665085 | -1.724205838 | 1.94E-06    | 1.09E-05    |
| ENSDARG00000068483 | neto1             | 0.302426227 | -1.725344837 | 5.90E-06    | 3.10E-05    |
| ENSDARG00000034930 | cx52.6            | 0.301944805 | -1.727643243 | 3.54E-08    | 2.50E-07    |
| ENSDARG00000056144 | TMEM150B          | 0.300538869 | -1.734376505 | 5.56E-05    | 0.000249679 |
| ENSDARG00000011635 | SCX (1 of 2)      | 0.300484061 | -1.734639628 | 2.32E-10    | 2.07E-09    |
| ENSDARG00000027381 | CCDC171           | 0.300004574 | -1.736943599 | 8.05E-05    | 0.000351359 |
| ENSDARG00000011640 | syt5b             | 0.298165681 | -1.745813882 | 1.22E-292   | 1.73E-289   |
| ENSDARG00000056805 | PLCH2 (1 of 2)    | 0.298123689 | -1.746017079 | 6.39E-23    | 1.49E-21    |
| ENSDARG00000015752 | zap70             | 0.297549007 | -1.748800794 | 2.83E-06    | 1.56E-05    |
| ENSDARG00000007080 | rhcgl1            | 0.29506131  | -1.760913334 | 1.94E-138   | 9.48E-136   |
| ENSDARG00000057661 | aldoca            | 0.290368886 | -1.784041223 | 2.47E-08    | 1.77E-07    |
| ENSDARG00000010933 | CACNA1F (1 of 2)  | 0.289767473 | -1.787032436 | 1.52E-75    | 2.96E-73    |
| ENSDARG00000093471 | si:ch211-224m9.4  | 0.288952995 | -1.791093271 | 2.26E-12    | 2.46E-11    |
| ENSDARG00000003317 | si:dkeyp-35f12.3  | 0.288852979 | -1.79159272  | 1.80E-24    | 4.55E-23    |
| ENSDARG00000002771 | SLC4A5 (1 of 2)   | 0.287527899 | -1.798226148 | 3.64E-20    | 7.08E-19    |
| ENSDARG00000094844 | si:ch211-260b17.2 | 0.286843479 | -1.801664372 | 1.35E-06    | 7.75E-06    |
| ENSDARG00000019179 | lrit1a            | 0.286163498 | -1.805088434 | 1.11E-10    | 1.02E-09    |
| ENSDARG00000052223 | rcvrna            | 0.285366026 | -1.809114509 | 5.78E-99    | 1.87E-96    |
| ENSDARG00000075425 | CR376723.1        | 0.283663487 | -1.817747637 | 0.000375511 | 0.001448364 |
| ENSDARG00000034201 | ppa1a             | 0.28334508  | -1.819367945 | 1.81E-05    | 8.82E-05    |
| ENSDARG00000012125 | cnga1             | 0.282816171 | -1.822063481 | 1.80E-11    | 1.78E-10    |
| ENSDARG00000075986 | RIC3 (1 of 2)     | 0.282452618 | -1.823919223 | 8.87E-14    | 1.08E-12    |
| ENSDARG00000013134 | CABZ01071407.1    | 0.281585015 | -1.828357534 | 2.96E-19    | 5.41E-18    |

|                    |                   |             |              |             |             |
|--------------------|-------------------|-------------|--------------|-------------|-------------|
| ENSDARG00000010296 | KCNH6             | 0.280377664 | -1.834556673 | 0.000118686 | 0.000503405 |
| ENSDARG00000052896 | Irit1b            | 0.280012587 | -1.836436416 | 3.05E-35    | 1.35E-33    |
| ENSDARG00000096324 | si:ch211-155d24.7 | 0.278788266 | -1.842758255 | 1.76E-13    | 2.10E-12    |
| ENSDARG00000070972 | si:ch211-81a5.8   | 0.276856339 | -1.85279054  | 1.06E-16    | 1.61E-15    |
| ENSDARG00000035798 | gngt1             | 0.27673761  | -1.853409367 | 9.80E-46    | 6.97E-44    |
| ENSDARG00000063293 | neto2b            | 0.276136718 | -1.856545356 | 3.90E-09    | 3.08E-08    |
| ENSDARG00000074519 | si:dkey-224j12.3  | 0.276040986 | -1.857045603 | 3.06E-07    | 1.92E-06    |
| ENSDARG00000087082 | CNGB3 (2 of 2)    | 0.275973503 | -1.857398337 | 1.68E-24    | 4.27E-23    |
| ENSDARG00000037805 | lgals3bpa         | 0.275052368 | -1.862221769 | 3.78E-05    | 0.000175246 |
| ENSDARG00000068474 | si:dkey-94e7.2    | 0.274847306 | -1.863297756 | 1.91E-23    | 4.54E-22    |
| ENSDARG00000076872 | MPP4 (3 of 3)     | 0.271351101 | -1.881767334 | 1.05E-26    | 2.98E-25    |
| ENSDARG00000004643 | cdhr1a            | 0.271340703 | -1.881822617 | 1.30E-40    | 7.21E-39    |
| ENSDARG00000021345 | prph2l            | 0.269091411 | -1.893831754 | 9.56E-34    | 3.88E-32    |
| ENSDARG00000068088 | tcnl              | 0.268023081 | -1.899570848 | 2.19E-34    | 9.29E-33    |
| ENSDARG00000078622 | scpp5             | 0.267898798 | -1.900239989 | 1.85E-09    | 1.51E-08    |
| ENSDARG00000069615 | ckmt2a            | 0.267037928 | -1.904883431 | 4.19E-220   | 4.25E-217   |
| ENSDARG00000009637 |                   | 0.266065208 | -1.910148228 | 3.69E-90    | 9.43E-88    |
| ENSDARG00000091068 | CABZ01063789.1    | 0.265942997 | -1.910811047 | 8.61E-10    | 7.27E-09    |
| ENSDARG00000070726 | cnga3a            | 0.264882527 | -1.916575417 | 6.91E-46    | 4.95E-44    |
| ENSDARG00000078210 | tulp1b            | 0.264414413 | -1.919127277 | 4.25E-54    | 4.32E-52    |
| ENSDARG00000053207 | MYH13 (5 of 11)   | 0.263755439 | -1.922727248 | 6.20E-178   | 4.09E-175   |
| ENSDARG00000011113 | chrna10a          | 0.263417706 | -1.924575773 | 5.11E-09    | 3.99E-08    |
| ENSDARG00000070931 | si:ch211-232m10.6 | 0.261924112 | -1.932779221 | 5.12E-09    | 4.00E-08    |
| ENSDARG00000082099 | dre-mir-137-3     | 0.261637846 | -1.934356854 | 2.63E-06    | 1.45E-05    |
| ENSDARG00000076448 | serpinf2a         | 0.260821477 | -1.938865424 | 1.24E-14    | 1.63E-13    |
| ENSDARG00000038770 | zgc:103625        | 0.260091807 | -1.942907142 | 3.31E-44    | 2.18E-42    |
| ENSDARG00000034628 | slc1a8a           | 0.258762324 | -1.950300521 | 5.45E-51    | 4.90E-49    |
| ENSDARG00000011671 | pde6b             | 0.257235833 | -1.958836473 | 1.58E-26    | 4.43E-25    |
| ENSDARG00000010555 | pdha1b            | 0.257169778 | -1.959206983 | 1.00E-08    | 7.57E-08    |
| ENSDARG00000092243 | si:ch211-163b2.2  | 0.255352934 | -1.969435457 | 1.49E-11    | 1.49E-10    |

|                    |                      |             |              |             |             |
|--------------------|----------------------|-------------|--------------|-------------|-------------|
| ENSDARG00000044475 | ompa                 | 0.255274248 | -1.969880087 | 1.85E-23    | 4.40E-22    |
| ENSDARG00000075058 | gabra6a              | 0.254306998 | -1.975356933 | 4.08E-07    | 2.53E-06    |
| ENSDARG00000044199 | gnat1                | 0.254135497 | -1.976330196 | 1.33E-92    | 3.67E-90    |
| ENSDARG00000091228 | C12H17orf62 (2 of 2) | 0.252983849 | -1.982882812 | 6.99E-27    | 2.01E-25    |
| ENSDARG00000086360 | RP1 (2 of 2)         | 0.251866561 | -1.9892685   | 6.96E-50    | 5.99E-48    |
| ENSDARG00000021055 | isl1l                | 0.248671244 | -2.007688407 | 0.000112724 | 0.000480414 |
| ENSDARG00000091745 | CABZ01055591.1       | 0.247264457 | -2.015873223 | 2.59E-07    | 1.65E-06    |
| ENSDARG00000043953 | BX119910.1           | 0.245279979 | -2.027498617 | 6.21E-17    | 9.60E-16    |
| ENSDARG00000012610 | saga                 | 0.244496154 | -2.032116326 | 7.00E-107   | 2.48E-104   |
| ENSDARG00000093549 | sepp1a               | 0.243817027 | -2.036129217 | 0           | 0           |
| ENSDARG00000061481 |                      | 0.243724762 | -2.036675259 | 6.94E-129   | 3.18E-126   |
| ENSDARG00000041735 | tmem237a             | 0.243003102 | -2.040953366 | 1.95E-23    | 4.64E-22    |
| ENSDARG00000041205 | slc6a1l              | 0.241886948 | -2.047595169 | 8.40E-08    | 5.66E-07    |
| ENSDARG00000063519 | PLEKHB1 (1 of 2)     | 0.240332255 | -2.056897808 | 2.34E-06    | 1.30E-05    |
| ENSDARG00000076043 | si:dkeyp-73d8.9      | 0.239379244 | -2.062630033 | 6.59E-13    | 7.49E-12    |
| ENSDARG00000054797 | RDH13 (3 of 3)       | 0.238680981 | -2.066844485 | 2.84E-70    | 4.74E-68    |
| ENSDARG00000029321 |                      | 0.238157889 | -2.070009756 | 1.81E-08    | 1.33E-07    |
| ENSDARG00000079544 | si:ch1073-464p5.5    | 0.237444064 | -2.074340407 | 5.83E-20    | 1.12E-18    |
| ENSDARG00000013393 | guca1b               | 0.237133179 | -2.076230563 | 7.54E-05    | 0.000330866 |
| ENSDARG00000090428 | ctrb1                | 0.236354857 | -2.080973581 | 1.13E-23    | 2.74E-22    |
| ENSDARG00000088025 |                      | 0.235849997 | -2.08405851  | 7.43E-06    | 3.85E-05    |
| ENSDARG00000013051 | C5H11orf53 (1 of 2)  | 0.235289306 | -2.087492344 | 5.00E-05    | 0.000226462 |
| ENSDARG00000096756 | si:ch211-196c10.13   | 0.234170357 | -2.094369636 | 1.37E-28    | 4.30E-27    |
| ENSDARG00000079569 | CR385022.1           | 0.232803517 | -2.102815243 | 2.11E-16    | 3.15E-15    |
| ENSDARG00000045811 |                      | 0.226512627 | -2.142336619 | 9.76E-18    | 1.61E-16    |
| ENSDARG00000018530 | mapkapk2b            | 0.225475948 | -2.148954552 | 1.48E-21    | 3.12E-20    |
| ENSDARG00000093153 | si:ch73-268e11.2     | 0.22314615  | -2.163939182 | 1.44E-05    | 7.11E-05    |
| ENSDARG00000014095 | CT027835.1           | 0.222581815 | -2.167592366 | 4.62E-05    | 0.00021078  |
| ENSDARG00000041162 | GRM1 (2 of 2)        | 0.221544776 | -2.174329788 | 7.84E-10    | 6.65E-09    |
| ENSDARG00000079413 | PPEF2                | 0.221042294 | -2.177605655 | 5.53E-11    | 5.25E-10    |



|                     |                    |             |              |           |           |
|---------------------|--------------------|-------------|--------------|-----------|-----------|
| ENSDARG00000070652  | si:ch211-134a4.1   | 0.220710133 | -2.179775232 | 8.10E-15  | 1.08E-13  |
| ENSDARG00000091797  | ugt2b5             | 0.214389    | -2.221697212 | 2.82E-09  | 2.26E-08  |
| ENSDARG00000007086  | aqp10a             | 0.211279205 | -2.24277732  | 1.27E-06  | 7.32E-06  |
| ENSDARG000000052620 |                    | 0.211043721 | -2.244386192 | 6.17E-07  | 3.72E-06  |
| ENSDARG000000095802 | C20H2orf71         | 0.210443615 | -2.248494354 | 1.40E-44  | 9.44E-43  |
| ENSDARG00000070666  | rho1               | 0.208788738 | -2.259884201 | 2.85E-09  | 2.28E-08  |
| ENSDARG000000059978 | cplx4a             | 0.208686138 | -2.260593321 | 3.89E-58  | 4.60E-56  |
| ENSDARG000000089270 | FP102168.1         | 0.205698519 | -2.281396689 | 1.29E-05  | 6.43E-05  |
| ENSDARG000000019752 | rom1a              | 0.204993454 | -2.286350254 | 7.16E-44  | 4.62E-42  |
| ENSDARG000000097311 | si:dkey-201i2.1    | 0.202331262 | -2.305208845 | 1.12E-07  | 7.42E-07  |
| ENSDARG000000095820 | si:dkey-6n3.3      | 0.20202986  | -2.307359556 | 4.90E-17  | 7.65E-16  |
| ENSDARG000000019902 | rcv1               | 0.198591601 | -2.33212349  | 0         | 0         |
| ENSDARG000000026926 | rom1b              | 0.196409644 | -2.348062328 | 1.68E-46  | 1.24E-44  |
| ENSDARG000000073742 | si:ch73-103b2.3    | 0.196283947 | -2.348985904 | 4.58E-27  | 1.33E-25  |
| ENSDARG000000020814 | faimb              | 0.19561382  | -2.353919799 | 7.04E-27  | 2.02E-25  |
| ENSDARG000000009386 | MPP4 (1 of 3)      | 0.191917735 | -2.381440062 | 2.29E-24  | 5.77E-23  |
| ENSDARG000000037656 | si:ch1073-417l11.1 | 0.191819659 | -2.382177509 | 4.64E-39  | 2.43E-37  |
| ENSDARG000000035163 | tmem136b           | 0.191763453 | -2.382600303 | 3.05E-08  | 2.17E-07  |
| ENSDARG000000077687 | rp1                | 0.191366804 | -2.385587508 | 1.08E-15  | 1.53E-14  |
| ENSDARG000000060792 | si:dkey-97i18.6    | 0.18918023  | -2.402166763 | 7.15E-07  | 4.27E-06  |
| ENSDARG000000002193 | rho                | 0.18794384  | -2.411626461 | 0         | 0         |
| ENSDARG000000061149 | nrn1lb             | 0.186664246 | -2.42148248  | 6.78E-24  | 1.66E-22  |
| ENSDARG000000071592 | aqp8a.2            | 0.185228626 | -2.432621016 | 6.09E-08  | 4.16E-07  |
| ENSDARG000000070439 | pde6h              | 0.185045675 | -2.434046682 | 1.37E-31  | 4.93E-30  |
| ENSDARG000000088637 | CR391924.1         | 0.182627479 | -2.453024238 | 2.10E-27  | 6.22E-26  |
| ENSDARG000000053480 | aqp9b              | 0.180795597 | -2.467568549 | 1.37E-27  | 4.10E-26  |
| ENSDARG000000031588 | si:dkey-239b22.1   | 0.180182218 | -2.472471454 | 7.53E-164 | 4.65E-161 |
| ENSDARG000000076015 | PLBD1 (2 of 2)     | 0.17458816  | -2.517972372 | 5.90E-07  | 3.57E-06  |
| ENSDARG000000061101 | snx19a             | 0.171853268 | -2.540750807 | 3.10E-55  | 3.25E-53  |
| ENSDARG000000057792 | cx52.7             | 0.170227474 | -2.554464195 | 1.85E-06  | 1.04E-05  |

|                    |                  |             |              |           |           |
|--------------------|------------------|-------------|--------------|-----------|-----------|
| ENSDARG00000092968 |                  | 0.166086165 | -2.589996197 | 2.00E-08  | 1.46E-07  |
| ENSDARG00000027236 | rs1a             | 0.161806313 | -2.627660202 | 0         | 0         |
| ENSDARG00000096216 | si:ch211-162i8.7 | 0.159916796 | -2.644606662 | 2.96E-07  | 1.86E-06  |
| ENSDARG00000043820 | nme2a            | 0.15705179  | -2.670687708 | 1.86E-49  | 1.56E-47  |
| ENSDARG00000027424 | slc25a3a         | 0.15220496  | -2.715912718 | 1.07E-56  | 1.18E-54  |
| ENSDARG00000052664 | MSLN (1 of 2)    | 0.149532878 | -2.741465364 | 1.27E-29  | 4.19E-28  |
| ENSDARG00000090805 | CR385054.2       | 0.149190334 | -2.744774029 | 1.03E-44  | 6.96E-43  |
| ENSDARG00000030626 | Irit2            | 0.146606634 | -2.769977706 | 5.96E-15  | 8.02E-14  |
| ENSDARG00000079274 | zgc:66382        | 0.141310073 | -2.823063789 | 1.23E-10  | 1.13E-09  |
| ENSDARG00000023886 | cacna2d4b        | 0.140475807 | -2.831606407 | 5.52E-55  | 5.74E-53  |
| ENSDARG00000045592 | tnni2a.1         | 0.1404398   | -2.831976251 | 1.75E-88  | 4.37E-86  |
| ENSDARG00000035791 | si:busm1-71b9.3  | 0.140244657 | -2.833982282 | 9.18E-10  | 7.74E-09  |
| ENSDARG00000097539 | si:ch211-39f2.3  | 0.136932761 | -2.868460443 | 1.92E-35  | 8.60E-34  |
| ENSDARG00000017490 | cel.1            | 0.129854005 | -2.945037589 | 2.20E-22  | 4.89E-21  |
| ENSDARG00000014840 | prph2b           | 0.129312301 | -2.951068573 | 8.11E-43  | 4.92E-41  |
| ENSDARG00000038742 | RBP1             | 0.126944187 | -2.977733766 | 1.02E-09  | 8.54E-09  |
| ENSDARG00000074119 |                  | 0.126504059 | -2.982744419 | 1.47E-13  | 1.77E-12  |
| ENSDARG00000011184 | grk1b            | 0.126080978 | -2.987577467 | 1.17E-19  | 2.20E-18  |
| ENSDARG00000005776 | guk1b            | 0.124617387 | -3.004422727 | 8.26E-116 | 3.45E-113 |
| ENSDARG00000057427 | sv2ba            | 0.124432681 | -3.006562645 | 4.26E-265 | 5.26E-262 |
| ENSDARG00000019492 | shbg             | 0.121065824 | -3.046136433 | 1.24E-11  | 1.26E-10  |
| ENSDARG00000091135 | RD3L             | 0.120882392 | -3.048323984 | 1.24E-11  | 1.25E-10  |
| ENSDARG00000089582 | si:dkey-265e15.2 | 0.114492218 | -3.126678549 | 6.36E-17  | 9.82E-16  |
| ENSDARG00000076565 | GPR151           | 0.111764171 | -3.161470332 | 9.06E-18  | 1.50E-16  |
| ENSDARG00000088751 | IMPG2            | 0.110215219 | -3.181604646 | 2.66E-07  | 1.69E-06  |
| ENSDARG00000042529 | gnat2            | 0.108705613 | -3.20150166  | 3.51E-216 | 3.32E-213 |
| ENSDARG00000056511 | arr3a            | 0.10529059  | -3.247551595 | 0         | 0         |
| ENSDARG00000020602 | grk7a            | 0.104351586 | -3.260475565 | 2.65E-82  | 5.91E-80  |
| ENSDARG00000019782 |                  | 0.099069131 | -3.335420589 | 1.79E-35  | 8.02E-34  |
| ENSDARG00000017634 | pdcb             | 0.09540884  | -3.389733239 | 2.60E-97  | 8.20E-95  |

|                    |                    |             |              |                       |           |
|--------------------|--------------------|-------------|--------------|-----------------------|-----------|
| ENSDARG00000096659 | NLRP6 (145 of 145) | 0.089728571 | -3.47828875  | 1.47E-28              | 4.62E-27  |
| ENSDARG00000052138 | slc1a2a            | 0.086344438 | -3.53375295  | 1.12E-11              | 1.14E-10  |
| ENSDARG00000044280 | opn1mw2            | 0.084646248 | -3.562410069 | 1.51E-35              | 6.83E-34  |
| ENSDARG00000087311 | zgc:171951         | 0.077833589 | -3.6834633   | 2.02E-25              | 5.36E-24  |
| ENSDARG00000037925 | rgs9a              | 0.076644275 | -3.705678153 | 3.55E-37              | 1.71E-35  |
| ENSDARG00000044861 | opn1lw2            | 0.076499111 | -3.708413206 | 0                     | 0         |
| ENSDARG00000002696 | gnb3b              | 0.073950558 | -3.75729516  | 2.85E-181             | 1.93E-178 |
| ENSDARG00000087583 | si:ch211-226h8.13  | 0.067271833 | -3.893853622 | 8.23E-10              | 6.96E-09  |
| ENSDARG00000089997 | gngt2b             | 0.06086204  | -4.038313502 | 0                     | 0         |
| ENSDARG00000038018 | prph2a             | 0.057215238 | -4.127456761 | 2.91E-75              | 5.61E-73  |
| ENSDARG00000017274 | opn1sw2            | 0.05352218  | -4.223719298 | 8.93180033685773e-312 | 0.00E+00  |
| ENSDARG00000045677 | opn1sw1            | 0.043409758 | -4.525836818 | 0                     | 0         |
