# Supplementary material for: Whole organism transcriptome analysis of zebrafish models of Bardet-Biedl Syndrome and Alström Syndrome provides mechanistic insight into shared and divergent phenotypes
Source: PubMed Central journal article supplement (PMC4855444; doi:10.1186/s12864-016-2679-1), 2016-05-03
Supplement: 12864_2016_2679_MOESM3_ESM.pdf [file 12864_2016_2679_MOESM3_ESM.pdf]

**Supplementary Table 2. Differentially expressed genes in BBS model**

| Feature.ID         | gene_symbol      | FC          | LFC(BBS/Control) | p.Value               | FDR                   |
|--------------------|------------------|-------------|------------------|-----------------------|-----------------------|
| ENSDARG00000074210 |                  | 117.0063206 | 6.870442655      | 3.52E-21              | 3.23E-20              |
| ENSDARG00000094559 | zgc:174855       | 98.16697308 | 6.617165826      | 0                     | 0                     |
| ENSDARG00000094508 | si:dkey-21o19.8  | 97.58691773 | 6.608615851      | 9.26E-202             | 4.18E-199             |
| ENSDARG00000090014 | CAPN2 (3 of 4)   | 88.17824696 | 6.46235089       | 1.73E-149             | 4.39E-147             |
| ENSDARG00000096563 | si:dkey-269i1.2  | 81.65940024 | 6.351547066      | 2.84E-138             | 6.12E-136             |
| ENSDARG00000095072 | si:dkey-26g8.4   | 74.62013284 | 6.221493023      | 0                     | 0                     |
| ENSDARG00000075527 | si:dkey-269i1.3  | 69.50396377 | 6.119023351      | 0                     | 0                     |
| ENSDARG00000079376 | zgc:174153       | 69.00902386 | 6.108713121      | 0                     | 0                     |
| ENSDARG00000091085 | lepa             | 67.79511512 | 6.083109421      | 1.17E-61              | 4.81E-60              |
| ENSDARG00000089750 | si:dkey-26g8.5   | 67.70008425 | 6.081085724      | 0                     | 0                     |
| ENSDARG00000097527 | si:ch73-56d11.3  | 59.86932657 | 5.903745137      | 5.63E-11              | 2.77E-10              |
| ENSDARG00000078738 | NAMPT (3 of 6)   | 51.04286411 | 5.673637378      | 3.64E-09              | 1.56E-08              |
| ENSDARG00000094584 | si:ch211-92l17.1 | 50.74383281 | 5.665160589      | 1.17E-90              | 9.67E-89              |
| ENSDARG00000074306 | ctslb            | 44.75563078 | 5.483997297      | 0                     | 0                     |
| ENSDARG00000093639 | si:dkey-90a24.1  | 44.58463426 | 5.478474677      | 3.43E-220             | 1.74E-217             |
| ENSDARG00000090918 | si:dkey-269i1.4  | 41.63876156 | 5.379855255      | 0                     | 0                     |
| ENSDARG00000078557 | CU896645.1       | 39.91871365 | 5.318993327      | 6.53648849447969e-321 | 6.19070677092478e-318 |
| ENSDARG00000097929 | si:dkey-117j14.6 | 37.51722262 | 5.229481125      | 0                     | 0                     |
| ENSDARG00000069382 | mxtx1            | 34.77412892 | 5.119942471      | 5.91E-17              | 4.30E-16              |
| ENSDARG00000095893 | si:dkey-85n7.7   | 33.76408144 | 5.077417404      | 1.31E-44              | 3.27E-43              |
| ENSDARG00000095744 | si:dkey-269i1.4  | 31.94302531 | 4.997429051      | 2.74E-236             | 1.56E-233             |
| ENSDARG00000069481 | ghrh             | 31.37070492 | 4.971346043      | 1.85E-88              | 1.46E-86              |
| ENSDARG00000088938 | BX548011.4       | 29.96726547 | 4.905315538      | 2.00E-09              | 8.72E-09              |
| ENSDARG00000079403 | si:dkey-204l11.1 | 27.82437634 | 4.798277446      | 1.94E-161             | 5.75E-159             |
| ENSDARG00000095252 | si:dkey-40h20.1  | 26.22467764 | 4.712853134      | 3.03E-158             | 8.77E-156             |
| ENSDARG00000045548 | lepb             | 24.07431241 | 4.589422689      | 2.05E-18              | 1.61E-17              |
| ENSDARG00000093738 | pth1a            | 22.8344365  | 4.513139283      | 7.92E-24              | 8.28E-23              |
| ENSDARG00000023656 | he1a             | 21.72308964 | 4.441157405      | 0                     | 0                     |

|                    |                   |             |             |           |           |
|--------------------|-------------------|-------------|-------------|-----------|-----------|
| ENSDARG00000020738 | zgc:153921        | 21.38451925 | 4.418494869 | 5.07E-07  | 1.81E-06  |
| ENSDARG00000095866 | fabp1b.2          | 21.13748453 | 4.401731794 | 2.65E-48  | 7.39E-47  |
| ENSDARG00000092126 | vtg5              | 19.60943399 | 4.293475989 | 5.41E-09  | 2.29E-08  |
| ENSDARG00000019122 | he1b              | 19.43703581 | 4.280736317 | 0         | 0         |
| ENSDARG00000095254 | si:dkey-239j18.2  | 18.39267025 | 4.201059041 | 4.86E-16  | 3.33E-15  |
| ENSDARG00000037859 | il11a             | 18.24879001 | 4.189728904 | 1.58E-18  | 1.25E-17  |
| ENSDARG00000096603 | bmb               | 17.78288417 | 4.152417426 | 0         | 0         |
| ENSDARG00000070212 | zgc:158463        | 17.75931821 | 4.150504292 | 9.64E-104 | 1.09E-101 |
| ENSDARG00000056551 | si:dkey-24c2.6    | 17.56329864 | 4.134491924 | 5.11E-08  | 1.99E-07  |
| ENSDARG00000094983 | si:ch211-122 24.5 | 17.45923949 | 4.125918813 | 3.09E-10  | 1.44E-09  |
| ENSDARG00000051775 |                   | 17.3340326  | 4.115535418 | 8.05E-12  | 4.20E-11  |
| ENSDARG00000053563 | si:ch73-56d11.4   | 15.13345327 | 3.919669326 | 1.78E-14  | 1.11E-13  |
| ENSDARG00000084533 | BX296557.1        | 14.45472517 | 3.853469274 | 1.92E-16  | 1.35E-15  |
| ENSDARG00000091345 | Metazoa_SRP       | 14.41360539 | 3.849359349 | 1.46E-09  | 6.49E-09  |
| ENSDARG00000037262 | CDKN2B            | 14.22595748 | 3.830453851 | 6.12E-21  | 5.55E-20  |
| ENSDARG00000086233 |                   | 13.8956172  | 3.79655801  | 1.13E-07  | 4.28E-07  |
| ENSDARG00000040194 | BX545917.1        | 13.66411145 | 3.772319743 | 4.26E-42  | 9.51E-41  |
| ENSDARG00000091047 | CABZ01045617.2    | 13.50177453 | 3.755077127 | 7.37E-53  | 2.39E-51  |
| ENSDARG00000095489 | BX296549.5        | 13.06507519 | 3.707643522 | 3.48E-12  | 1.86E-11  |
| ENSDARG00000092419 | vtg7              | 12.62977914 | 3.658757506 | 1.62E-270 | 1.28E-267 |
| ENSDARG00000085168 | AL935186.3        | 12.46754716 | 3.640105755 | 1.48E-216 | 7.23E-214 |
| ENSDARG00000076930 |                   | 12.29974379 | 3.620556359 | 1.88E-06  | 6.36E-06  |
| ENSDARG00000007344 | tcap              | 11.9924949  | 3.584059921 | 0         | 0         |
| ENSDARG00000070289 | zgc:171759        | 11.93975814 | 3.577701707 | 1.07E-07  | 4.06E-07  |
| ENSDARG00000074937 |                   | 11.86102557 | 3.568156854 | 1.53E-07  | 5.74E-07  |
| ENSDARG00000092233 | vtg1              | 11.71448218 | 3.550221279 | 1.35E-70  | 7.02E-69  |
| ENSDARG00000090873 | si:ch211-122 24.4 | 11.67378564 | 3.545200578 | 1.33E-20  | 1.18E-19  |
| ENSDARG00000088485 | CU651569.4        | 11.38790173 | 3.509430043 | 3.43E-07  | 1.25E-06  |
| ENSDARG00000087472 | HIST2H4B (2 of 2) | 11.27608908 | 3.495194876 | 1.41E-10  | 6.73E-10  |
| ENSDARG00000088726 |                   | 11.17601717 | 3.482334238 | 1.74E-57  | 6.47E-56  |

|                    |                    |             |             |           |           |
|--------------------|--------------------|-------------|-------------|-----------|-----------|
| ENSDARG00000094931 |                    | 11.17573366 | 3.482297638 | 5.13E-07  | 1.83E-06  |
| ENSDARG00000087934 | CABZ01080435.1     | 11.14323467 | 3.478096175 | 7.68E-131 | 1.45E-128 |
| ENSDARG00000089806 | si:dkey-239j18.3   | 11.01187094 | 3.460987701 | 0         | 0         |
| ENSDARG00000069685 |                    | 10.59124832 | 3.404800736 | 1.09E-05  | 3.40E-05  |
| ENSDARG00000091205 | si:ch211-113a14.19 | 10.50902466 | 3.393556874 | 1.35E-16  | 9.63E-16  |
| ENSDARG00000085949 | AL935186.4         | 10.44667621 | 3.384972092 | 0         | 0         |
| ENSDARG00000070297 | zgc:112234         | 10.26648499 | 3.359870415 | 2.67E-06  | 8.89E-06  |
| ENSDARG00000014024 | ms4a17a.4          | 10.11887208 | 3.338976581 | 4.40E-30  | 6.04E-29  |
| ENSDARG00000039547 | zgc:171759         | 10.08691182 | 3.334412646 | 3.53E-18  | 2.74E-17  |
| ENSDARG00000055424 | CR392362.1         | 9.984917982 | 3.319750577 | 1.70E-05  | 5.20E-05  |
| ENSDARG00000039730 | zgc:112160         | 9.863852366 | 3.302151207 | 1.63E-19  | 1.37E-18  |
| ENSDARG00000088951 | AL935186.6         | 9.820525361 | 3.295800205 | 3.77E-18  | 2.92E-17  |
| ENSDARG00000076554 | cdkn1a             | 9.753151205 | 3.285868423 | 0         | 0         |
| ENSDARG00000089617 | RNaseP_nuc         | 9.577866199 | 3.259704282 | 8.02E-20  | 6.86E-19  |
| ENSDARG00000094610 | wu:fe11b02         | 9.473892914 | 3.243957365 | 1.23E-07  | 4.64E-07  |
| ENSDARG00000070280 |                    | 9.42932501  | 3.2371545   | 5.43E-07  | 1.94E-06  |
| ENSDARG00000089719 | si:dkey-108k21.11  | 9.24891371  | 3.20928393  | 1.29E-05  | 4.01E-05  |
| ENSDARG00000074631 | HIST4H4 (1 of 2)   | 9.029873817 | 3.174705828 | 1.94E-05  | 5.92E-05  |
| ENSDARG00000013855 | slc12a3            | 8.99417641  | 3.168991181 | 1.87E-89  | 1.50E-87  |
| ENSDARG00000089044 |                    | 8.941141756 | 3.160459071 | 7.59E-09  | 3.17E-08  |
| ENSDARG00000078674 | hspb9              | 8.922488169 | 3.157446083 | 0         | 0         |
| ENSDARG00000093195 | si:dkey-261m9.6    | 8.872887795 | 3.149403725 | 6.81E-08  | 2.61E-07  |
| ENSDARG00000014277 | vox                | 8.831846021 | 3.14271502  | 8.29E-66  | 3.81E-64  |
| ENSDARG00000051734 |                    | 8.805469155 | 3.138399873 | 2.82E-05  | 8.45E-05  |
| ENSDARG00000078724 | wu:fe11b02         | 8.79611035  | 3.136865703 | 8.07E-09  | 3.37E-08  |
| ENSDARG00000094744 | zgc:171759         | 8.65076885  | 3.11282836  | 4.79E-19  | 3.92E-18  |
| ENSDARG00000093071 |                    | 8.582962229 | 3.10147565  | 3.36E-10  | 1.56E-09  |
| ENSDARG00000011701 | ctsl1              | 8.322397394 | 3.056999179 | 3.98E-53  | 1.30E-51  |
| ENSDARG00000089437 |                    | 8.318647707 | 3.056349021 | 1.07E-05  | 3.33E-05  |
| ENSDARG00000086374 | isg15              | 8.25042127  | 3.044467786 | 8.14E-26  | 9.30E-25  |

|                    |                  |             |             |           |             |
|--------------------|------------------|-------------|-------------|-----------|-------------|
| ENSDARG00000033355 | PLA2G4C (1 of 5) | 8.092526394 | 3.016590166 | 5.61E-09  | 2.37E-08    |
| ENSDARG00000087670 |                  | 8.076242335 | 3.013684201 | 8.85E-05  | 0.000251415 |
| ENSDARG00000088381 | Metazoa_SRP      | 8.07082651  | 3.012716423 | 1.19E-10  | 5.72E-10    |
| ENSDARG00000089382 | zgc:158463       | 7.971348847 | 2.994823866 | 5.47E-54  | 1.84E-52    |
| ENSDARG00000085067 | AL935186.2       | 7.944751039 | 2.990002011 | 3.01E-168 | 9.62E-166   |
| ENSDARG00000071583 | gtf3ab           | 7.938048097 | 2.988784304 | 2.08E-06  | 6.99E-06    |
| ENSDARG00000039173 | ctslb            | 7.859473729 | 2.974432713 | 5.73E-48  | 1.58E-46    |
| ENSDARG00000001721 | oc90             | 7.848226994 | 2.972366769 | 8.77E-156 | 2.44E-153   |
| ENSDARG00000092662 | dnaaf3           | 7.710798687 | 2.946880303 | 1.77E-05  | 5.41E-05    |
| ENSDARG00000034203 | zgc:171759       | 7.700210931 | 2.944897966 | 1.47E-06  | 5.02E-06    |
| ENSDARG00000078962 | DUOXA1           | 7.675827749 | 2.940322337 | 3.10E-32  | 4.64E-31    |
| ENSDARG00000086552 |                  | 7.602187346 | 2.926414579 | 3.43E-05  | 0.000101841 |
| ENSDARG00000007602 | si:dkey-79f11.4  | 7.592719784 | 2.924616765 | 2.62E-08  | 1.05E-07    |
| ENSDARG00000074012 | FP325123.1       | 7.591684523 | 2.924420042 | 8.57E-06  | 2.71E-05    |
| ENSDARG00000012395 | mmp13a           | 7.528215758 | 2.912307976 | 1.46E-113 | 2.04E-111   |
| ENSDARG00000007276 | ela3l            | 7.483211423 | 2.903657536 | 2.52E-12  | 1.36E-11    |
| ENSDARG00000088533 | BX537263.8       | 7.467953828 | 2.900713008 | 1.82E-07  | 6.78E-07    |
| ENSDARG00000081218 | 5_8S_rRNA        | 7.453465715 | 2.897911406 | 8.02E-240 | 5.07E-237   |
| ENSDARG00000082257 | dre-mir-219-1    | 7.397853235 | 2.887106679 | 1.69E-06  | 5.75E-06    |
| ENSDARG00000086555 |                  | 7.277926831 | 2.863527547 | 6.50E-10  | 2.95E-09    |
| ENSDARG00000002295 | si:dkey-21p1.3   | 7.256590485 | 2.859291856 | 3.89E-22  | 3.73E-21    |
| ENSDARG00000090426 | CU457819.3       | 7.238963375 | 2.855783117 | 5.03E-08  | 1.96E-07    |
| ENSDARG00000093052 | c6               | 7.203271991 | 2.848652381 | 1.19E-41  | 2.62E-40    |
| ENSDARG00000090297 | ldlrad2          | 7.096344733 | 2.827076096 | 1.01E-121 | 1.66E-119   |
| ENSDARG00000002204 | hspb11           | 7.096165266 | 2.82703961  | 4.86E-220 | 2.42E-217   |
| ENSDARG00000015355 | fosl1a           | 7.026929674 | 2.81289446  | 2.09E-112 | 2.85E-110   |
| ENSDARG00000095761 | si:dkey-58b18.8  | 6.977975451 | 2.802808522 | 1.46E-05  | 4.51E-05    |
| ENSDARG00000063223 | arl14            | 6.960852954 | 2.799264099 | 2.24E-103 | 2.51E-101   |
| ENSDARG00000053774 | alpi.2           | 6.938630046 | 2.794650847 | 4.53E-15  | 2.93E-14    |
| ENSDARG00000092395 | CABZ01086354.1   | 6.814123161 | 2.768528024 | 2.99E-07  | 1.09E-06    |

|                    |                    |             |             |             |             |
|--------------------|--------------------|-------------|-------------|-------------|-------------|
| ENSDARG00000043328 | fip1l1a            | 6.803633918 | 2.766305516 | 8.20E-18    | 6.25E-17    |
| ENSDARG00000025428 | socs3a             | 6.765016434 | 2.758093439 | 1.43E-270   | 1.16E-267   |
| ENSDARG00000052288 | CR788231.1         | 6.679738559 | 2.739791638 | 3.28E-08    | 1.30E-07    |
| ENSDARG00000088963 | Metazoa_SRP        | 6.611088346 | 2.724887794 | 2.45E-06    | 8.17E-06    |
| ENSDARG00000097785 | hist2h3c           | 6.60661348  | 2.723910942 | 2.59E-10    | 1.21E-09    |
| ENSDARG00000074260 | si:ch211-113a14.19 | 6.59604467  | 2.721601169 | 3.82E-12    | 2.03E-11    |
| ENSDARG00000080156 | SNORD30            | 6.561133102 | 2.713944989 | 4.21E-05    | 0.000123856 |
| ENSDARG00000085497 | RNaseP_nuc         | 6.494986392 | 2.699326503 | 9.97E-06    | 3.13E-05    |
| ENSDARG00000020332 | nkx2.9             | 6.492957043 | 2.698875665 | 1.98E-38    | 3.81E-37    |
| ENSDARG00000090182 |                    | 6.488649333 | 2.6979182   | 0.000110717 | 0.000310421 |
| ENSDARG00000097752 | si:rp71-77l1.2     | 6.428862481 | 2.68456349  | 1.53E-13    | 8.93E-13    |
| ENSDARG00000089039 |                    | 6.376151745 | 2.672685964 | 1.44E-05    | 4.45E-05    |
| ENSDARG00000031683 | fos                | 6.368814276 | 2.671024801 | 1.13E-237   | 6.97E-235   |
| ENSDARG00000068941 | HIST2H3C           | 6.268326659 | 2.648080364 | 5.47E-14    | 3.29E-13    |
| ENSDARG00000087425 | SNORA62            | 6.240489582 | 2.641659216 | 8.32E-06    | 2.63E-05    |
| ENSDARG00000009443 | zgc:92137          | 6.173307516 | 2.626043659 | 3.31E-08    | 1.31E-07    |
| ENSDARG00000089397 | wu:fe11b02         | 6.173169605 | 2.626011429 | 6.12E-08    | 2.36E-07    |
| ENSDARG00000075263 | ankrd1a            | 6.044497531 | 2.595622416 | 3.97E-131   | 7.57E-129   |
| ENSDARG00000092858 | si:ch1073-126c3.2  | 6.035180451 | 2.593396908 | 5.94E-06    | 1.91E-05    |
| ENSDARG00000068874 | PTCHD3 (2 of 3)    | 6.005133816 | 2.586196395 | 1.66E-05    | 5.11E-05    |
| ENSDARG00000087451 |                    | 5.974955841 | 2.578928051 | 0.000316934 | 0.000836511 |
| ENSDARG00000090893 | HIST1H4A           | 5.96870672  | 2.577418367 | 4.88E-07    | 1.75E-06    |
| ENSDARG00000093546 | ms4a17a.2          | 5.956033624 | 2.574351898 | 4.28E-16    | 2.94E-15    |
| ENSDARG00000086546 |                    | 5.951028353 | 2.573138991 | 1.40E-06    | 4.78E-06    |
| ENSDARG00000095340 |                    | 5.933239221 | 2.568819952 | 0.000324288 | 0.000854652 |
| ENSDARG00000033662 | scd                | 5.933013565 | 2.568765081 | 5.98E-23    | 6.01E-22    |
| ENSDARG00000094057 | cyp2j20            | 5.897318834 | 2.560059195 | 3.55E-08    | 1.40E-07    |
| ENSDARG00000091667 | si:dkey-234i14.3   | 5.847697762 | 2.547868748 | 1.26E-21    | 1.18E-20    |
| ENSDARG00000090079 | Metazoa_SRP        | 5.823990594 | 2.542008026 | 2.13E-05    | 6.47E-05    |
| ENSDARG00000035422 | cyr61l1            | 5.804843941 | 2.537257282 | 2.14E-106   | 2.55E-104   |

|                    |                   |             |             |             |             |
|--------------------|-------------------|-------------|-------------|-------------|-------------|
| ENSDARG00000097258 | hist2h3c          | 5.802166774 | 2.536591764 | 0.000163455 | 0.000447854 |
| ENSDARG00000095424 | si:ch211-133n4.7  | 5.801047166 | 2.536313349 | 0.00024646  | 0.000658207 |
| ENSDARG00000090186 | rps27.2           | 5.800881845 | 2.536272234 | 3.36E-254   | 2.27E-251   |
| ENSDARG00000032637 | si:dkey-261m9.12  | 5.764850895 | 2.527283294 | 0.000167428 | 0.000457814 |
| ENSDARG00000077239 |                   | 5.732893765 | 2.519263545 | 1.22E-05    | 3.79E-05    |
| ENSDARG00000097103 | HIST1H4L          | 5.692309955 | 2.509014221 | 8.44E-05    | 0.000240397 |
| ENSDARG00000040118 | zgc:113232        | 5.674563025 | 2.504509301 | 5.83E-195   | 2.47E-192   |
| ENSDARG00000083337 | RNase_MRP         | 5.577279251 | 2.479561508 | 7.23E-31    | 1.02E-29    |
| ENSDARG00000093910 | FP015791.1        | 5.568686904 | 2.47733718  | 7.08E-57    | 2.58E-55    |
| ENSDARG00000088291 |                   | 5.543790301 | 2.470872687 | 4.35E-05    | 0.000127765 |
| ENSDARG00000087564 | NEK11             | 5.508401385 | 2.461633689 | 1.21E-14    | 7.65E-14    |
| ENSDARG00000075508 | si:dkey-108k21.10 | 5.455741054 | 2.447775171 | 8.66E-08    | 3.30E-07    |
| ENSDARG00000039806 | ntlb              | 5.426862611 | 2.440118385 | 5.46E-14    | 3.29E-13    |
| ENSDARG00000053417 | HTR3C             | 5.402343106 | 2.433585269 | 9.96E-18    | 7.55E-17    |
| ENSDARG00000095161 | si:rp71-10g3.1    | 5.399215266 | 2.432749738 | 6.38E-06    | 2.04E-05    |
| ENSDARG00000088259 | wu:fe11b02        | 5.382539191 | 2.428286919 | 1.09E-05    | 3.39E-05    |
| ENSDARG00000056210 | si:ch211-199o1.2  | 5.37844081  | 2.427188001 | 2.35E-101   | 2.53E-99    |
| ENSDARG00000076129 | CABZ01086354.1    | 5.375216567 | 2.426322882 | 5.44E-06    | 1.75E-05    |
| ENSDARG00000017164 | vent              | 5.374820816 | 2.426216659 | 1.28E-05    | 3.97E-05    |
| ENSDARG00000077587 | si:dkey-261m9.16  | 5.343146628 | 2.417689608 | 3.62E-09    | 1.55E-08    |
| ENSDARG00000070265 |                   | 5.339483959 | 2.416700318 | 5.46E-06    | 1.76E-05    |
| ENSDARG00000019763 | acp5a             | 5.306229639 | 2.407687113 | 1.84E-204   | 8.45E-202   |
| ENSDARG00000091446 |                   | 5.264683104 | 2.396346694 | 2.10E-05    | 6.37E-05    |
| ENSDARG00000088479 | Metazoa_SRP       | 5.264267232 | 2.396232727 | 0.000636186 | 0.001612483 |
| ENSDARG00000088889 | si:dkey-108k21.14 | 5.233773835 | 2.387851583 | 3.86E-07    | 1.39E-06    |
| ENSDARG00000093477 | CYP46A1 (5 of 5)  | 5.216131766 | 2.382980314 | 2.47E-05    | 7.44E-05    |
| ENSDARG00000080823 | SNORA73           | 5.213126918 | 2.382148984 | 0.000242635 | 0.00064903  |
| ENSDARG00000042816 | mmp9              | 5.211000319 | 2.381560343 | 2.63E-169   | 8.58E-167   |
| ENSDARG00000088154 | CABZ01072971.1    | 5.210609788 | 2.381452218 | 2.16E-13    | 1.25E-12    |
| ENSDARG00000090909 | CU651569.6        | 5.194996349 | 2.377122735 | 1.09E-05    | 3.40E-05    |

|                    |                    |             |             |             |             |
|--------------------|--------------------|-------------|-------------|-------------|-------------|
| ENSDARG00000088371 | junbb              | 5.190902545 | 2.375985403 | 1.87E-224   | 9.83E-222   |
| ENSDARG00000086709 | si:ch211-113a14.14 | 5.184900458 | 2.374316292 | 1.90E-06    | 6.42E-06    |
| ENSDARG00000031483 | col9a1             | 5.175817908 | 2.371786862 | 1.31E-64    | 5.85E-63    |
| ENSDARG00000096310 | TAF1C              | 5.152016507 | 2.365137216 | 4.29E-152   | 1.11E-149   |
| ENSDARG00000087095 | Metazoa_SRP        | 5.151435863 | 2.364974612 | 2.98E-05    | 8.90E-05    |
| ENSDARG00000090491 | Metazoa_SRP        | 5.151213018 | 2.364912201 | 1.59E-09    | 7.01E-09    |
| ENSDARG00000057113 | c6                 | 5.142484007 | 2.362465402 | 7.82E-228   | 4.19E-225   |
| ENSDARG00000077327 | si:dkey-21o19.6    | 5.131747299 | 2.35945013  | 8.22E-107   | 9.93E-105   |
| ENSDARG00000054321 | ngs                | 5.108930209 | 2.353021228 | 3.04E-190   | 1.25E-187   |
| ENSDARG00000096992 | zgc:153405         | 5.078115304 | 2.344293153 | 1.52E-05    | 4.68E-05    |
| ENSDARG00000038025 | cbx7a              | 5.074758823 | 2.34333926  | 3.36E-112   | 4.55E-110   |
| ENSDARG00000086076 | HIST1H4D           | 5.071893782 | 2.342524532 | 4.94E-07    | 1.77E-06    |
| ENSDARG00000091313 | HIST4H4 (2 of 2)   | 5.044114506 | 2.334601026 | 0.000338094 | 0.000889386 |
| ENSDARG00000033231 | mcm6l              | 5.0137727   | 2.325896593 | 2.98E-07    | 1.09E-06    |
| ENSDARG00000061547 | zgc:153409         | 5.001831886 | 2.322456569 | 2.12E-05    | 6.44E-05    |
| ENSDARG00000058815 | ihhb               | 4.987424444 | 2.318294986 | 1.72E-14    | 1.07E-13    |
| ENSDARG00000092743 | zgc:171759         | 4.985788709 | 2.317821745 | 3.88E-06    | 1.27E-05    |
| ENSDARG00000013856 | amy2a              | 4.980812983 | 2.316381242 | 4.95E-05    | 0.00014458  |
| ENSDARG00000095533 | si:ch211-198c19.3  | 4.955065256 | 2.308904057 | 7.55E-29    | 9.81E-28    |
| ENSDARG00000040442 | prtgb              | 4.947341809 | 2.306653578 | 3.32E-79    | 2.16E-77    |
| ENSDARG00000086666 | HIST1H4K           | 4.93740933  | 2.303754255 | 0.000116836 | 0.000326418 |
| ENSDARG00000051770 |                    | 4.890861221 | 2.290088529 | 7.96E-05    | 0.000227374 |
| ENSDARG00000091770 | si:ch211-113a14.14 | 4.852798991 | 2.278817103 | 3.33E-07    | 1.21E-06    |
| ENSDARG00000079783 | isg20              | 4.851741238 | 2.278502608 | 1.63E-212   | 7.85E-210   |
| ENSDARG00000087853 | Metazoa_SRP        | 4.839622599 | 2.274894549 | 4.16E-51    | 1.27E-49    |
| ENSDARG00000076667 | ccng1              | 4.837464428 | 2.274251053 | 6.60E-06    | 2.11E-05    |
| ENSDARG00000075366 | si:ch211-113a14.10 | 4.827531741 | 2.271285745 | 2.14E-07    | 7.94E-07    |
| ENSDARG00000090123 | Metazoa_SRP        | 4.818453011 | 2.268570036 | 0.000109907 | 0.000308383 |
| ENSDARG00000087506 | BX548011.3         | 4.797159552 | 2.262180424 | 2.03E-05    | 6.18E-05    |
| ENSDARG00000016918 | ace2               | 4.789564838 | 2.259894584 | 1.29E-07    | 4.85E-07    |

|                    |                    |             |             |             |             |
|--------------------|--------------------|-------------|-------------|-------------|-------------|
| ENSDARG00000089031 | larsa              | 4.760223295 | 2.25102925  | 1.70E-06    | 5.76E-06    |
| ENSDARG00000090149 | HIST1H4I           | 4.744410229 | 2.246228759 | 1.38E-05    | 4.29E-05    |
| ENSDARG00000087774 | Metazoa_SRP        | 4.742740814 | 2.245721029 | 2.75E-30    | 3.81E-29    |
| ENSDARG00000087004 | si:ch211-122l24.4  | 4.714751448 | 2.237181717 | 1.79E-14    | 1.11E-13    |
| ENSDARG00000096596 | si:ch211-113a14.14 | 4.702101309 | 2.233305623 | 6.53E-10    | 2.96E-09    |
| ENSDARG00000035559 | tp53               | 4.691486115 | 2.230044996 | 6.27E-108   | 7.81E-106   |
| ENSDARG00000007377 | odc1               | 4.69121684  | 2.229962187 | 4.47E-142   | 1.00E-139   |
| ENSDARG00000091744 | BX296557.7         | 4.652814632 | 2.218103711 | 5.71E-105   | 6.54E-103   |
| ENSDARG00000059369 |                    | 4.639280416 | 2.213901051 | 5.53E-06    | 1.78E-05    |
| ENSDARG00000089064 | CR848728.2         | 4.591280501 | 2.198896575 | 2.02E-12    | 1.10E-11    |
| ENSDARG00000092002 | DHPS (2 of 2)      | 4.579931446 | 2.195326004 | 2.88E-06    | 9.56E-06    |
| ENSDARG00000036359 | minal              | 4.575651833 | 2.19397728  | 1.03E-176   | 3.52E-174   |
| ENSDARG00000090531 | ttc25              | 4.534910142 | 2.181073965 | 6.11E-10    | 2.78E-09    |
| ENSDARG00000031051 | il4r               | 4.514349043 | 2.17451797  | 1.24E-79    | 8.21E-78    |
| ENSDARG00000086248 | kcnj1a.3           | 4.511881617 | 2.173729215 | 1.40E-18    | 1.11E-17    |
| ENSDARG00000014358 | optc               | 4.485441114 | 2.165249872 | 4.30E-62    | 1.79E-60    |
| ENSDARG00000090590 | Metazoa_SRP        | 4.480367591 | 2.163617103 | 6.10E-06    | 1.96E-05    |
| ENSDARG00000070945 | zgc:163083         | 4.449037255 | 2.153493179 | 6.82E-07    | 2.41E-06    |
| ENSDARG00000046012 | slc47a1            | 4.449021126 | 2.153487949 | 2.19E-112   | 2.98E-110   |
| ENSDARG00000059545 | foxj1a             | 4.41229357  | 2.141528783 | 1.77E-141   | 3.93E-139   |
| ENSDARG00000077960 | si:ch211-186e20.7  | 4.39244343  | 2.135023706 | 2.21E-05    | 6.70E-05    |
| ENSDARG00000092780 | si:ch1073-170o4.1  | 4.387066883 | 2.133256701 | 0.000661287 | 0.001672226 |
| ENSDARG00000068589 | CABZ01079764.1     | 4.378106302 | 2.130306984 | 3.00E-177   | 1.04E-174   |
| ENSDARG00000088158 | Metazoa_SRP        | 4.33670398  | 2.116598969 | 0.000781892 | 0.001957866 |
| ENSDARG00000060211 | ankef1b            | 4.330502121 | 2.114534315 | 2.01E-08    | 8.10E-08    |
| ENSDARG00000091234 | CU019646.2         | 4.327116819 | 2.11340607  | 9.75E-49    | 2.76E-47    |
| ENSDARG00000074253 | olig3              | 4.322282316 | 2.111793307 | 1.56E-148   | 3.86E-146   |
| ENSDARG00000009905 | ntlA               | 4.286285677 | 2.099728007 | 3.02E-97    | 3.02E-95    |
| ENSDARG00000091768 | CR932360.4         | 4.262742206 | 2.091781809 | 0.000911769 | 0.00226092  |
| ENSDARG00000056795 | serpine1           | 4.246684095 | 2.086336793 | 1.34E-108   | 1.68E-106   |



|                    |                    |             |             |             |             |
|--------------------|--------------------|-------------|-------------|-------------|-------------|
| ENSDARG00000087235 |                    | 4.237193927 | 2.083109159 | 1.35E-06    | 4.64E-06    |
| ENSDARG00000091783 | si:dkeyp-71f10.5   | 4.204426586 | 2.071909054 | 1.15E-49    | 3.35E-48    |
| ENSDARG00000088775 | NLRP6 (56 of 145)  | 4.201891934 | 2.071039059 | 4.16E-07    | 1.50E-06    |
| ENSDARG00000057504 |                    | 4.19091678  | 2.067265874 | 5.34E-78    | 3.36E-76    |
| ENSDARG00000055527 | cmn                | 4.188300046 | 2.066364799 | 2.06E-140   | 4.50E-138   |
| ENSDARG00000075045 | cxcl-c1c           | 4.171133422 | 2.06043946  | 2.44E-37    | 4.48E-36    |
| ENSDARG00000067759 | exd1               | 4.159104683 | 2.056272998 | 4.37E-06    | 1.42E-05    |
| ENSDARG00000087543 |                    | 4.147087301 | 2.052098418 | 2.92E-05    | 8.74E-05    |
| ENSDARG00000074185 | pcsk9              | 4.137040205 | 2.048598978 | 0.000149591 | 0.000412054 |
| ENSDARG00000074745 | CABZ01044297.1     | 4.135269309 | 2.047981288 | 2.93E-130   | 5.37E-128   |
| ENSDARG00000074491 | zgc:171759         | 4.130343517 | 2.046261774 | 1.88E-15    | 1.24E-14    |
| ENSDARG00000091224 | DUSP13 (2 of 3)    | 4.128245841 | 2.045528887 | 0.000436068 | 0.001130165 |
| ENSDARG00000077739 | col5a3a            | 4.116210707 | 2.041316835 | 5.44E-14    | 3.28E-13    |
| ENSDARG00000076106 | ftr43              | 4.094965898 | 2.033851438 | 0.00165469  | 0.003961801 |
| ENSDARG00000088111 | CU929417.2         | 4.094657447 | 2.033742763 | 9.53E-17    | 6.86E-16    |
| ENSDARG00000009612 | chia.3             | 4.074943731 | 2.026780138 | 0.001686411 | 0.004032655 |
| ENSDARG00000093156 | si:ch73-21g5.7     | 4.071028963 | 2.025393485 | 4.59E-173   | 1.52E-170   |
| ENSDARG00000018566 | flnca              | 4.07052276  | 2.025214086 | 7.03E-158   | 2.02E-155   |
| ENSDARG00000092660 | cyp27c1            | 4.0645666   | 2.023101528 | 2.16E-74    | 1.24E-72    |
| ENSDARG00000089086 | MUSTN1             | 4.062979933 | 2.022538239 | 4.15E-82    | 2.89E-80    |
| ENSDARG00000087504 | CABZ01045618.2     | 4.046277707 | 2.016595339 | 6.30E-16    | 4.28E-15    |
| ENSDARG00000092665 | si:ch1073-382c16.2 | 4.042482551 | 2.015241546 | 2.78E-102   | 3.03E-100   |
| ENSDARG00000087854 | ano9a              | 4.011715066 | 2.004219142 | 5.04E-08    | 1.96E-07    |
| ENSDARG00000037804 | phlda3             | 3.956578782 | 1.984253484 | 1.79E-125   | 3.05E-123   |
| ENSDARG00000087264 | Metazoa_SRP        | 3.955335854 | 1.983800201 | 1.17E-07    | 4.42E-07    |
| ENSDARG00000078299 | COLGALT2 (2 of 2)  | 3.949952357 | 1.981835252 | 7.38E-24    | 7.73E-23    |
| ENSDARG00000059805 | slc25a38a          | 3.943270942 | 1.979392841 | 5.98E-41    | 1.27E-39    |
| ENSDARG00000071707 | heatr1             | 3.943191301 | 1.979363703 | 7.37E-164   | 2.25E-161   |
| ENSDARG00000089793 | Metazoa_SRP        | 3.941717362 | 1.978824333 | 2.45E-05    | 7.38E-05    |
| ENSDARG00000074378 | junba              | 3.922687944 | 1.971842571 | 1.71E-122   | 2.83E-120   |

|                    |                    |             |             |             |             |
|--------------------|--------------------|-------------|-------------|-------------|-------------|
| ENSDARG00000019741 | si:ch211-152f23.5  | 3.917847987 | 1.970061422 | 8.17E-50    | 2.40E-48    |
| ENSDARG00000010434 | clu                | 3.900097866 | 1.963510326 | 1.82E-165   | 5.74E-163   |
| ENSDARG00000069265 | matn3b             | 3.882020682 | 1.956807804 | 1.84E-123   | 3.07E-121   |
| ENSDARG00000087337 | BX537263.2         | 3.874448734 | 1.953991055 | 0.001229479 | 0.002995214 |
| ENSDARG00000086164 | Metazoa_SRP        | 3.871124864 | 1.952752843 | 2.15E-07    | 7.98E-07    |
| ENSDARG00000068680 | ctrl               | 3.858290841 | 1.947961899 | 2.65E-07    | 9.75E-07    |
| ENSDARG00000076241 | txlnbb             | 3.845486706 | 1.943166205 | 4.02E-126   | 6.89E-124   |
| ENSDARG00000018342 | ggt1b              | 3.844859801 | 1.942930993 | 4.95E-23    | 4.99E-22    |
| ENSDARG00000042982 | cyp2p8             | 3.829936169 | 1.937320348 | 1.21E-10    | 5.83E-10    |
| ENSDARG00000069726 | glis3              | 3.82475331  | 1.935366699 | 2.11E-18    | 1.66E-17    |
| ENSDARG00000083784 | SNORD22            | 3.816541518 | 1.932265886 | 1.67E-11    | 8.54E-11    |
| ENSDARG00000078294 | si:ch211-113a14.14 | 3.801342464 | 1.926509004 | 3.99E-08    | 1.57E-07    |
| ENSDARG00000075220 | si:ch211-113a14.19 | 3.792683733 | 1.923219072 | 4.59E-07    | 1.65E-06    |
| ENSDARG00000006409 | mapk12b            | 3.789267045 | 1.921918816 | 2.44E-40    | 5.09E-39    |
| ENSDARG00000055294 | atoh1a             | 3.778949655 | 1.917985298 | 1.68E-30    | 2.34E-29    |
| ENSDARG00000096496 | si:dkey-261e22.5   | 3.778540913 | 1.917829244 | 5.64E-09    | 2.38E-08    |
| ENSDARG00000090342 | CCDC37 (2 of 2)    | 3.776182544 | 1.916928508 | 0.001427179 | 0.003446702 |
| ENSDARG00000091265 | wu:fe11b02         | 3.767584918 | 1.913640029 | 7.11E-06    | 2.27E-05    |
| ENSDARG00000091685 | Metazoa_SRP        | 3.76341126  | 1.912040953 | 8.01E-07    | 2.81E-06    |
| ENSDARG00000027515 | rrp1               | 3.739162501 | 1.902715171 | 3.73E-153   | 1.00E-150   |
| ENSDARG00000091735 | si:ch211-244h4.1   | 3.738407644 | 1.902423892 | 0.000300486 | 0.00079487  |
| ENSDARG00000081931 | SNORA16            | 3.738037775 | 1.902281148 | 6.72E-07    | 2.38E-06    |
| ENSDARG00000075330 | phox2ba            | 3.730095926 | 1.899212732 | 0.000106205 | 0.000298567 |
| ENSDARG00000079002 | dnai1              | 3.727915865 | 1.8983693   | 0.000104962 | 0.000295219 |
| ENSDARG00000039957 | rspo1              | 3.700928898 | 1.887887419 | 1.02E-43    | 2.46E-42    |
| ENSDARG00000074897 | hes2.1             | 3.691037011 | 1.884026204 | 2.62E-34    | 4.26E-33    |
| ENSDARG00000094362 | si:dkey-162b3.5    | 3.66402926  | 1.873431024 | 1.50E-05    | 4.64E-05    |
| ENSDARG00000057648 | dnttip2            | 3.663680078 | 1.873293529 | 1.73E-144   | 4.05E-142   |
| ENSDARG00000088865 | BX537263.9         | 3.642811131 | 1.865052198 | 1.56E-35    | 2.68E-34    |
| ENSDARG00000055751 | fosb               | 3.642738514 | 1.865023438 | 1.55E-29    | 2.07E-28    |

|                    |                    |             |             |             |             |
|--------------------|--------------------|-------------|-------------|-------------|-------------|
| ENSDARG00000074904 | DBNDD2             | 3.622929658 | 1.857156795 | 2.38E-43    | 5.65E-42    |
| ENSDARG00000082753 | AC024175.17        | 3.61882211  | 1.855520191 | 1.09E-74    | 6.30E-73    |
| ENSDARG00000086751 | zgc:112234         | 3.613930611 | 1.853568806 | 4.49E-06    | 1.46E-05    |
| ENSDARG00000067831 | tbata              | 3.612698549 | 1.853076878 | 1.53E-24    | 1.65E-23    |
| ENSDARG00000074069 | zgc:171452         | 3.604425061 | 1.849769155 | 3.89E-09    | 1.66E-08    |
| ENSDARG00000079274 | zgc:66382          | 3.596189773 | 1.846469155 | 1.89E-15    | 1.25E-14    |
| ENSDARG00000063665 | mat2al             | 3.595812544 | 1.846317813 | 8.04E-117   | 1.21E-114   |
| ENSDARG00000075985 | FP243385.1         | 3.587428737 | 1.842950173 | 1.17E-10    | 5.61E-10    |
| ENSDARG00000043798 | ms4a17a.1          | 3.580671719 | 1.840230256 | 3.07E-05    | 9.18E-05    |
| ENSDARG00000097461 | si:dkey-31b16.15   | 3.569011135 | 1.835524402 | 0.000626364 | 0.001588864 |
| ENSDARG00000002259 | ca15c              | 3.549830882 | 1.827750295 | 3.46E-17    | 2.55E-16    |
| ENSDARG00000091525 | si:ch211-113a14.14 | 3.546422969 | 1.826364611 | 3.08E-11    | 1.54E-10    |
| ENSDARG00000042145 | lhx8b              | 3.539630936 | 1.823598944 | 2.74E-05    | 8.23E-05    |
| ENSDARG00000097592 |                    | 3.538688768 | 1.82321488  | 0.000254505 | 0.00067899  |
| ENSDARG00000031774 | pus7               | 3.529859189 | 1.819610634 | 6.38E-144   | 1.49E-141   |
| ENSDARG00000096905 | si:ch73-23l24.1    | 3.520889656 | 1.815940014 | 1.47E-143   | 3.36E-141   |
| ENSDARG00000088564 | CABZ01045617.1     | 3.516528779 | 1.814152024 | 2.10E-39    | 4.23E-38    |
| ENSDARG00000094292 |                    | 3.514577273 | 1.813351175 | 0.000198663 | 0.000537632 |
| ENSDARG00000015676 | nmd3               | 3.508217361 | 1.810738136 | 1.89E-143   | 4.30E-141   |
| ENSDARG00000044841 | notch1a            | 3.500159388 | 1.80742062  | 5.92E-98    | 6.02E-96    |
| ENSDARG00000058498 | slc9a3.1           | 3.494412716 | 1.805050011 | 1.85E-15    | 1.22E-14    |
| ENSDARG00000073720 | RNF180 (2 of 2)    | 3.488643116 | 1.802666019 | 1.74E-82    | 1.22E-80    |
| ENSDARG00000038131 | SRF (1 of 2)       | 3.48637982  | 1.801729751 | 3.30E-106   | 3.91E-104   |
| ENSDARG00000087053 | DDX47 (2 of 2)     | 3.484677857 | 1.801025292 | 1.83E-68    | 8.98E-67    |
| ENSDARG00000017835 | brf1a              | 3.480221136 | 1.799178979 | 4.12E-82    | 2.87E-80    |
| ENSDARG00000090352 | si:dkey-97i18.5    | 3.462629946 | 1.791868214 | 7.49E-97    | 7.44E-95    |
| ENSDARG00000078442 | AL954696.1         | 3.456483349 | 1.789304976 | 3.65E-106   | 4.28E-104   |
| ENSDARG00000008433 | unc45b             | 3.453888937 | 1.788221692 | 2.75E-111   | 3.66E-109   |
| ENSDARG00000081082 | SNORA16            | 3.444840779 | 1.784437303 | 0.000232786 | 0.000623975 |
| ENSDARG00000086605 | si:dkey-8o9.5      | 3.444006967 | 1.784088061 | 0.002379708 | 0.005562703 |

|                    |                   |             |             |             |             |
|--------------------|-------------------|-------------|-------------|-------------|-------------|
| ENSDARG00000077067 | ddx47             | 3.427013562 | 1.776951901 | 2.23E-86    | 1.70E-84    |
| ENSDARG00000083593 | SNORA54           | 3.419762098 | 1.773895965 | 0.000106773 | 0.000300013 |
| ENSDARG00000087359 | c3b               | 3.419074527 | 1.77360587  | 3.37E-12    | 1.80E-11    |
| ENSDARG00000086957 | si:dkeyp-118a3.2  | 3.418871639 | 1.773520258 | 1.59E-50    | 4.78E-49    |
| ENSDARG00000038147 | hbbe3             | 3.414361748 | 1.771615918 | 3.38E-138   | 7.21E-136   |
| ENSDARG00000086785 |                   | 3.414360006 | 1.771615182 | 5.30E-08    | 2.06E-07    |
| ENSDARG00000091005 | si:dkeyp-80d11.11 | 3.41430632  | 1.771592498 | 0.002101352 | 0.004955655 |
| ENSDARG00000091765 | PLA2G4C (5 of 5)  | 3.401567932 | 1.766199901 | 5.59E-27    | 6.73E-26    |
| ENSDARG00000076557 | bicc2             | 3.390826169 | 1.761636826 | 1.32E-13    | 7.74E-13    |
| ENSDARG00000087732 | Metazoa_SRP       | 3.385052155 | 1.759178062 | 1.38E-105   | 1.60E-103   |
| ENSDARG00000044488 | pak1ip1           | 3.383870928 | 1.758674541 | 9.39E-131   | 1.76E-128   |
| ENSDARG00000068850 | fhit              | 3.38293296  | 1.758274587 | 7.97E-12    | 4.16E-11    |
| ENSDARG00000036139 | lctla             | 3.377527307 | 1.755967434 | 5.82E-132   | 1.14E-129   |
| ENSDARG00000095925 | si:dkey-258f14.7  | 3.373816901 | 1.75438168  | 2.65E-08    | 1.06E-07    |
| ENSDARG00000093702 | si:dkey-126g1.9   | 3.367804383 | 1.751808343 | 1.00E-105   | 1.16E-103   |
| ENSDARG00000092833 | si:dkeyp-1h4.8    | 3.36602957  | 1.751047851 | 7.80E-11    | 3.80E-10    |
| ENSDARG00000062892 | foxe3             | 3.365219433 | 1.750700581 | 3.50E-15    | 2.28E-14    |
| ENSDARG00000095528 | si:dkey-121n8.5   | 3.364063354 | 1.750204876 | 1.79E-16    | 1.26E-15    |
| ENSDARG00000068934 | cyp1b1            | 3.363176116 | 1.749824329 | 5.45E-69    | 2.71E-67    |
| ENSDARG00000086654 | CT027762.3        | 3.362550215 | 1.749555813 | 1.82E-06    | 6.15E-06    |
| ENSDARG00000012215 | umps              | 3.362107155 | 1.749365706 | 2.32E-131   | 4.48E-129   |
| ENSDARG00000030700 | ctps1a            | 3.361286113 | 1.74901335  | 6.25E-117   | 9.50E-115   |
| ENSDARG00000069307 | pomcb             | 3.35501778  | 1.746320412 | 2.40E-06    | 8.02E-06    |
| ENSDARG00000057276 | iqca1             | 3.354162211 | 1.745952461 | 4.10E-23    | 4.16E-22    |
| ENSDARG00000086881 | IER2              | 3.353501349 | 1.745668182 | 4.80E-91    | 4.02E-89    |
| ENSDARG00000081050 | SNORA21           | 3.352669694 | 1.745310356 | 0.00045684  | 0.001180555 |
| ENSDARG00000007744 | tsr1              | 3.350587959 | 1.744414281 | 3.95E-125   | 6.68E-123   |
| ENSDARG00000096156 |                   | 3.348844255 | 1.743663282 | 0.000456563 | 0.001180054 |
| ENSDARG00000024511 | bxdc2             | 3.345891567 | 1.742390692 | 9.05E-134   | 1.86E-131   |
| ENSDARG00000097465 | TRMT61B           | 3.338710875 | 1.739291165 | 2.37E-60    | 9.46E-59    |

|                     |                 |             |             |             |             |
|---------------------|-----------------|-------------|-------------|-------------|-------------|
| ENSDARG00000017675  | cirh1a          | 3.336236584 | 1.738221599 | 1.33E-130   | 2.46E-128   |
| ENSDARG00000088881  | si:dkeyp-69b9.3 | 3.332759491 | 1.736717209 | 1.49E-132   | 2.97E-130   |
| ENSDARG00000001754  | noc2l           | 3.327816216 | 1.734575761 | 3.09E-130   | 5.63E-128   |
| ENSDARG000000051804 | BX664721.1      | 3.325496486 | 1.733569747 | 0.000872143 | 0.002168755 |
| ENSDARG00000004328  | CABZ01041200.1  | 3.323623658 | 1.732757032 | 4.05E-09    | 1.73E-08    |
| ENSDARG00000090581  | FP017279.3      | 3.321575197 | 1.731867576 | 3.07E-17    | 2.26E-16    |
| ENSDARG000000056029 | cyp26c1         | 3.319711691 | 1.731057952 | 1.23E-128   | 2.21E-126   |
| ENSDARG00000075991  | COL5A3          | 3.309555527 | 1.726637476 | 2.94E-07    | 1.08E-06    |
| ENSDARG00000045071  | chad            | 3.305054894 | 1.724674234 | 2.05E-118   | 3.19E-116   |
| ENSDARG00000079370  | utp18           | 3.299350746 | 1.722182156 | 1.81E-131   | 3.52E-129   |
| ENSDARG00000087694  | wu:fe11b02      | 3.294871597 | 1.720222244 | 0.000982411 | 0.002427028 |
| ENSDARG00000096716  | HMX1            | 3.292889722 | 1.719354197 | 5.95E-05    | 0.000172035 |
| ENSDARG00000078419  | filip1a         | 3.289593764 | 1.717909435 | 1.12E-15    | 7.52E-15    |
| ENSDARG000000052207 | c3c             | 3.285742566 | 1.716219451 | 7.69E-129   | 1.39E-126   |
| ENSDARG000000058549 | smyd1b          | 3.280815599 | 1.714054508 | 2.04E-126   | 3.51E-124   |
| ENSDARG000000091253 | CU469500.4      | 3.279608318 | 1.713523525 | 2.54E-130   | 4.69E-128   |
| ENSDARG00000007823  | atf3            | 3.27840247  | 1.712992976 | 1.08E-113   | 1.51E-111   |
| ENSDARG00000079105  | mhc2dab         | 3.277489202 | 1.712591027 | 0.002471879 | 0.005768665 |
| ENSDARG00000044853  | rrp7a           | 3.277301587 | 1.71250844  | 3.61E-83    | 2.58E-81    |
| ENSDARG00000096906  | si:dkey-7i4.24  | 3.276734219 | 1.712258658 | 0.001916964 | 0.004551039 |
| ENSDARG00000045372  | ngdn            | 3.274985751 | 1.711488629 | 1.88E-106   | 2.25E-104   |
| ENSDARG00000082634  | SNORD72         | 3.268893819 | 1.708802516 | 5.17E-05    | 0.000150659 |
| ENSDARG00000042839  | dph6            | 3.262349289 | 1.705911255 | 1.40E-78    | 8.97E-77    |
| ENSDARG00000019791  | prmt3           | 3.257443995 | 1.703740375 | 2.56E-100   | 2.70E-98    |
| ENSDARG00000088277  | susd5           | 3.251503755 | 1.70110709  | 2.42E-22    | 2.35E-21    |
| ENSDARG00000096322  | si:ch73-379f7.4 | 3.243071414 | 1.697360793 | 0.000315433 | 0.000832704 |
| ENSDARG00000089347  |                 | 3.240351504 | 1.696150321 | 3.34E-91    | 2.84E-89    |
| ENSDARG00000041895  | cad             | 3.239264168 | 1.695666127 | 1.23E-50    | 3.69E-49    |
| ENSDARG00000040479  | cga             | 3.23792408  | 1.695069159 | 1.57E-08    | 6.39E-08    |
| ENSDARG00000032584  | thnsl2          | 3.236927772 | 1.694625174 | 8.66E-11    | 4.20E-10    |

|                    |                    |             |             |             |             |
|--------------------|--------------------|-------------|-------------|-------------|-------------|
| ENSDARG00000058738 | SLC26A6 (3 of 4)   | 3.227832617 | 1.690565768 | 1.84E-11    | 9.38E-11    |
| ENSDARG00000043666 | abt1               | 3.227784851 | 1.690544418 | 1.85E-91    | 1.60E-89    |
| ENSDARG00000033443 | mdm2               | 3.223400626 | 1.688583507 | 1.12E-92    | 9.98E-91    |
| ENSDARG00000017354 | epha2a             | 3.222563241 | 1.688208671 | 7.31E-127   | 1.28E-124   |
| ENSDARG00000008852 | elp4               | 3.210665575 | 1.682872401 | 4.30E-72    | 2.31E-70    |
| ENSDARG00000043884 | nup43              | 3.204975865 | 1.680313493 | 2.58E-97    | 2.60E-95    |
| ENSDARG00000091156 | cyp2aa12           | 3.196473968 | 1.676481344 | 5.95E-07    | 2.11E-06    |
| ENSDARG00000056374 | noxo1b             | 3.190951003 | 1.673986456 | 7.61E-11    | 3.71E-10    |
| ENSDARG00000059390 | slc12a1            | 3.186158647 | 1.671818104 | 1.36E-18    | 1.08E-17    |
| ENSDARG00000088976 | BX537263.10        | 3.186076597 | 1.671780951 | 5.61E-09    | 2.37E-08    |
| ENSDARG00000029982 | TM6SF2 (2 of 2)    | 3.177023907 | 1.667675946 | 3.95E-91    | 3.34E-89    |
| ENSDARG00000007130 | mrto4              | 3.175975849 | 1.667199942 | 4.05E-114   | 5.70E-112   |
| ENSDARG00000089960 | si:ch1073-288h17.2 | 3.17209512  | 1.665436033 | 2.92E-09    | 1.26E-08    |
| ENSDARG00000017605 | rpp40              | 3.160743081 | 1.660263771 | 8.37E-53    | 2.71E-51    |
| ENSDARG00000040503 | CABZ01070258.1     | 3.159863217 | 1.659862109 | 3.59E-110   | 4.66E-108   |
| ENSDARG00000032768 | irf1b              | 3.156463319 | 1.658308986 | 1.33E-24    | 1.43E-23    |
| ENSDARG00000028323 | mybbp1a            | 3.155772518 | 1.657993213 | 1.57E-111   | 2.11E-109   |
| ENSDARG00000078081 | BX957353.1         | 3.154351125 | 1.657343262 | 2.73E-30    | 3.78E-29    |
| ENSDARG00000001937 | CABZ01043017.1     | 3.154010224 | 1.657187337 | 8.29E-13    | 4.61E-12    |
| ENSDARG00000091382 | HIST1H4E           | 3.149452825 | 1.655101202 | 0.007816723 | 0.016877921 |
| ENSDARG00000056130 | neurog1            | 3.148546341 | 1.654685902 | 1.36E-109   | 1.75E-107   |
| ENSDARG00000075953 | ddx24              | 3.144784686 | 1.652961244 | 2.98E-122   | 4.90E-120   |
| ENSDARG00000071652 | RRP8               | 3.143359564 | 1.652307309 | 5.12E-84    | 3.70E-82    |
| ENSDARG00000086515 | rad21a             | 3.140614824 | 1.651047017 | 1.21E-115   | 1.77E-113   |
| ENSDARG00000016789 |                    | 3.133719876 | 1.647876223 | 6.72E-14    | 4.03E-13    |
| ENSDARG00000086310 | C12H10orf107       | 3.133689188 | 1.647862095 | 1.91E-08    | 7.71E-08    |
| ENSDARG00000019547 | aaas               | 3.133095684 | 1.64758883  | 3.13E-113   | 4.34E-111   |
| ENSDARG00000094161 | si:ch73-265d7.2    | 3.131743436 | 1.646966027 | 1.97E-33    | 3.10E-32    |
| ENSDARG00000019659 | foxi1              | 3.12949181  | 1.645928401 | 1.22E-32    | 1.85E-31    |
| ENSDARG00000076766 | zgc:163061         | 3.126004219 | 1.644319725 | 5.83E-06    | 1.87E-05    |

|                    |                   |             |             |             |             |
|--------------------|-------------------|-------------|-------------|-------------|-------------|
| ENSDARG00000023526 | ggt1a             | 3.122576875 | 1.64273709  | 1.19E-09    | 5.29E-09    |
| ENSDARG00000094712 | si:dkeyp-20e4.9   | 3.112487934 | 1.638068245 | 0.000223604 | 0.00060118  |
| ENSDARG00000022410 | rrp12             | 3.109423378 | 1.636647067 | 2.39E-83    | 1.71E-81    |
| ENSDARG00000075693 | NUFIP1            | 3.109252851 | 1.636567944 | 1.73E-60    | 6.90E-59    |
| ENSDARG00000092285 | cenpv             | 3.108443704 | 1.636192451 | 5.52E-22    | 5.25E-21    |
| ENSDARG00000020298 | btg2              | 3.107128735 | 1.635582017 | 9.44E-95    | 8.97E-93    |
| ENSDARG00000054562 | her15.1           | 3.106773476 | 1.635417054 | 1.82E-119   | 2.89E-117   |
| ENSDARG00000090401 | CABZ01020840.1    | 3.104408105 | 1.634318227 | 1.02E-55    | 3.64E-54    |
| ENSDARG00000073901 | CABZ01046997.2    | 3.101357395 | 1.632899789 | 0.007125568 | 0.015502203 |
| ENSDARG00000010791 | dla               | 3.099414966 | 1.631995923 | 2.47E-75    | 1.45E-73    |
| ENSDARG00000033400 | atoh1b            | 3.095580953 | 1.630210188 | 1.06E-45    | 2.72E-44    |
| ENSDARG00000034423 | sncga             | 3.089850408 | 1.627536993 | 3.91E-118   | 5.97E-116   |
| ENSDARG00000012495 | mphosph10         | 3.088174196 | 1.626754133 | 3.14E-118   | 4.85E-116   |
| ENSDARG00000078643 | VTCN1             | 3.074417417 | 1.620313055 | 4.45E-06    | 1.45E-05    |
| ENSDARG00000071669 | smyd5             | 3.071513599 | 1.618949771 | 4.06E-86    | 3.05E-84    |
| ENSDARG00000091066 | zgc:112234        | 3.070135186 | 1.618302182 | 0.000396814 | 0.001034468 |
| ENSDARG00000078683 | RNF14 (3 of 5)    | 3.066352358 | 1.616523488 | 2.80E-63    | 1.20E-61    |
| ENSDARG00000088340 | spag1b            | 3.064651299 | 1.615722931 | 4.59E-05    | 0.0001345   |
| ENSDARG00000022232 | ppan              | 3.064112087 | 1.615469073 | 1.44E-116   | 2.16E-114   |
| ENSDARG00000058160 | tnfaip2b          | 3.062215058 | 1.614575606 | 1.27E-22    | 1.25E-21    |
| ENSDARG00000075482 | zgc:112234        | 3.059259487 | 1.613182482 | 4.39E-07    | 1.58E-06    |
| ENSDARG00000045254 | C24H7orf50        | 3.057704797 | 1.61244913  | 2.08E-59    | 8.16E-58    |
| ENSDARG00000002293 | si:ch211-197g15.9 | 3.055222628 | 1.61127751  | 7.42E-06    | 2.36E-05    |
| ENSDARG00000005772 | tsr2              | 3.054744119 | 1.611051538 | 1.68E-114   | 2.38E-112   |
| ENSDARG00000077559 |                   | 3.044756731 | 1.606326965 | 1.17E-115   | 1.72E-113   |
| ENSDARG00000020219 | dld               | 3.044369737 | 1.606143584 | 9.10E-99    | 9.37E-97    |
| ENSDARG00000008740 | esf1              | 3.041709547 | 1.604882397 | 1.15E-115   | 1.71E-113   |
| ENSDARG00000037158 | rcc1              | 3.040421324 | 1.604271258 | 2.56E-115   | 3.74E-113   |
| ENSDARG00000054560 | ZGC:136520        | 3.037153587 | 1.602719867 | 2.92E-74    | 1.67E-72    |
| ENSDARG00000055160 | chadla            | 3.02966913  | 1.599160246 | 2.28E-44    | 5.64E-43    |

|                    |                    |             |             |             |             |
|--------------------|--------------------|-------------|-------------|-------------|-------------|
| ENSDARG00000093381 | tgm2l              | 3.024911822 | 1.596893088 | 2.69E-60    | 1.07E-58    |
| ENSDARG00000077129 | notch1a            | 3.019619471 | 1.594366754 | 3.11E-109   | 3.96E-107   |
| ENSDARG00000015476 | iqch               | 3.01550508  | 1.592399666 | 2.68E-07    | 9.84E-07    |
| ENSDARG00000090203 | ORC2               | 3.001403677 | 1.585637369 | 7.91E-57    | 2.87E-55    |
| ENSDARG00000088420 |                    | 2.99601449  | 1.583044601 | 0.000517983 | 0.00132937  |
| ENSDARG00000088209 | Metazoa_SRP        | 2.995962659 | 1.583019642 | 0.000653853 | 0.00165405  |
| ENSDARG00000055365 | si:dkey-25e12.3    | 2.991485113 | 1.580861884 | 1.14E-13    | 6.72E-13    |
| ENSDARG00000086218 | nkd3               | 2.990431573 | 1.580353706 | 0.003331133 | 0.00763294  |
| ENSDARG00000091831 | ddx27              | 2.989410936 | 1.579861229 | 7.80E-112   | 1.05E-109   |
| ENSDARG00000091527 | CABZ01068153.1     | 2.988487009 | 1.579415272 | 2.35E-10    | 1.10E-09    |
| ENSDARG00000076815 | eif3s10            | 2.985476123 | 1.577961031 | 6.41E-09    | 2.70E-08    |
| ENSDARG00000079938 | zgc:173594         | 2.984553874 | 1.577515296 | 2.72E-58    | 1.03E-56    |
| ENSDARG00000053227 | hamp2              | 2.983039309 | 1.576782989 | 1.15E-18    | 9.17E-18    |
| ENSDARG00000045565 | noc4l              | 2.980566602 | 1.575586611 | 1.06E-95    | 1.03E-93    |
| ENSDARG00000097655 | si:dkey-30e9.6     | 2.976238033 | 1.573489914 | 8.23E-11    | 4.00E-10    |
| ENSDARG00000016484 | dkc1               | 2.974859292 | 1.572821432 | 5.06E-87    | 3.90E-85    |
| ENSDARG00000010478 | hsp90aa1.1         | 2.974429637 | 1.57261305  | 5.76E-42    | 1.28E-40    |
| ENSDARG00000073747 | si:dkey-1j5.4      | 2.972693896 | 1.571770914 | 1.50E-32    | 2.27E-31    |
| ENSDARG00000089060 | kcnj1a.5           | 2.972484934 | 1.571669498 | 8.54E-25    | 9.34E-24    |
| ENSDARG00000022020 | FOCAD              | 2.969472563 | 1.570206702 | 3.03E-90    | 2.48E-88    |
| ENSDARG00000052895 | htra3a             | 2.968285628 | 1.569629924 | 0.00038681  | 0.001009409 |
| ENSDARG00000051735 | si:ch211-113a14.18 | 2.967967624 | 1.569475354 | 0.009075857 | 0.019374329 |
| ENSDARG00000087775 | Metazoa_SRP        | 2.967522551 | 1.569258994 | 0.007869596 | 0.01698563  |
| ENSDARG00000077928 | ccdc173            | 2.966549628 | 1.568785918 | 8.20E-27    | 9.81E-26    |
| ENSDARG00000056744 | ela2               | 2.959524526 | 1.565365413 | 3.30E-18    | 2.57E-17    |
| ENSDARG00000059075 | nip7               | 2.958450903 | 1.564841953 | 3.31E-85    | 2.44E-83    |
| ENSDARG00000079497 | C5H8orf4 (2 of 2)  | 2.945495288 | 1.558510245 | 4.20E-109   | 5.33E-107   |
| ENSDARG00000033029 | pkd1b              | 2.944875776 | 1.558206778 | 1.69E-65    | 7.66E-64    |
| ENSDARG00000091471 | ECT2L              | 2.943648322 | 1.557605323 | 1.07E-23    | 1.11E-22    |
| ENSDARG00000079909 | zgc:171759         | 2.94288804  | 1.557232657 | 0.000532317 | 0.001362832 |



|                    |                   |             |             |             |             |
|--------------------|-------------------|-------------|-------------|-------------|-------------|
| ENSDARG00000087353 | CABZ01057633.1    | 2.941367487 | 1.556487042 | 3.99E-07    | 1.44E-06    |
| ENSDARG00000040730 | wdr75             | 2.940633044 | 1.556126764 | 2.06E-108   | 2.58E-106   |
| ENSDARG00000087779 | im:7148292        | 2.93963072  | 1.555634933 | 8.05E-106   | 9.37E-104   |
| ENSDARG00000041991 | rrp9              | 2.935584332 | 1.553647702 | 2.05E-100   | 2.18E-98    |
| ENSDARG00000025467 | aatf              | 2.930843273 | 1.551315822 | 7.21E-103   | 7.94E-101   |
| ENSDARG00000005001 | grem2             | 2.928877627 | 1.550347917 | 5.53E-51    | 1.68E-49    |
| ENSDARG00000087021 | CABZ01085878.1    | 2.928294692 | 1.550060748 | 2.18E-67    | 1.05E-65    |
| ENSDARG00000093423 | swsap1            | 2.927618414 | 1.549727525 | 4.74E-05    | 0.00013889  |
| ENSDARG00000026611 | socs3b            | 2.925058232 | 1.548465346 | 2.39E-106   | 2.85E-104   |
| ENSDARG00000077481 | si:dkey-76k16.6   | 2.924226159 | 1.548054893 | 3.77E-25    | 4.18E-24    |
| ENSDARG00000024561 | nolc1             | 2.920845572 | 1.546386084 | 1.10E-77    | 6.87E-76    |
| ENSDARG00000018902 | pes               | 2.919888513 | 1.545913285 | 6.38E-100   | 6.64E-98    |
| ENSDARG00000097269 | si:ch211-222n22.1 | 2.91869618  | 1.545324042 | 0.007267494 | 0.015775942 |
| ENSDARG00000056732 | her4.1            | 2.917428477 | 1.544697288 | 3.78E-63    | 1.62E-61    |
| ENSDARG00000088392 | si:dkey-238o14.9  | 2.917387555 | 1.544677051 | 3.10E-05    | 9.25E-05    |
| ENSDARG00000074160 | PAQR4 (1 of 2)    | 2.916253985 | 1.544116374 | 4.45E-05    | 0.000130624 |
| ENSDARG00000091749 | fsip1             | 2.916219515 | 1.544099321 | 4.51E-11    | 2.23E-10    |
| ENSDARG00000035696 | fam203a           | 2.908293184 | 1.540172714 | 1.41E-43    | 3.38E-42    |
| ENSDARG00000069245 | matn3a            | 2.907875134 | 1.53996532  | 4.67E-94    | 4.37E-92    |
| ENSDARG00000090635 | kcnj1a.4          | 2.906193797 | 1.539130911 | 5.33E-11    | 2.62E-10    |
| ENSDARG00000056043 | lama1             | 2.901300094 | 1.536699527 | 1.20E-95    | 1.16E-93    |
| ENSDARG00000068903 | sdad1             | 2.900696615 | 1.536399411 | 3.38E-106   | 3.98E-104   |
| ENSDARG00000078878 | METTL21C (2 of 2) | 2.898019455 | 1.53506728  | 2.97E-13    | 1.71E-12    |
| ENSDARG00000090337 | pprc1             | 2.897856474 | 1.534986143 | 1.42E-106   | 1.71E-104   |
| ENSDARG00000086848 | atad3b            | 2.896447676 | 1.534284603 | 2.42E-103   | 2.70E-101   |
| ENSDARG00000042186 | paplnb            | 2.895654618 | 1.533889534 | 0.001791501 | 0.004267789 |
| ENSDARG00000037002 | zgc:152968        | 2.894934689 | 1.533530801 | 0.007358252 | 0.015957108 |
| ENSDARG00000077911 | treh              | 2.891549508 | 1.531842803 | 0.006386219 | 0.014019289 |
| ENSDARG00000090375 | BX001033.2        | 2.890689651 | 1.531413727 | 2.72E-24    | 2.90E-23    |
| ENSDARG00000058372 | mcph1             | 2.889873188 | 1.531006187 | 6.78E-25    | 7.44E-24    |

|                     |                  |             |             |             |             |
|---------------------|------------------|-------------|-------------|-------------|-------------|
| ENSDARG00000009806  | smfn             | 2.888492994 | 1.530316995 | 1.35E-78    | 8.62E-77    |
| ENSDARG000000089570 | ccdc169          | 2.884951941 | 1.528547286 | 1.09E-05    | 3.40E-05    |
| ENSDARG000000059171 | stpg1            | 2.884582492 | 1.528362522 | 6.79E-05    | 0.000195419 |
| ENSDARG000000087437 | crygn1           | 2.882673526 | 1.527407455 | 1.02E-10    | 4.90E-10    |
| ENSDARG000000006434 | polr1e           | 2.87353207  | 1.522825151 | 3.85E-89    | 3.07E-87    |
| ENSDARG000000011931 | dph5             | 2.872222565 | 1.522167546 | 9.71E-89    | 7.69E-87    |
| ENSDARG000000093877 | MFAP4 (10 of 14) | 2.871559924 | 1.521834668 | 0.002290279 | 0.005368673 |
| ENSDARG000000062152 | chaf1a           | 2.870429976 | 1.521266862 | 2.02E-71    | 1.08E-69    |
| ENSDARG000000052344 | tbl3             | 2.870382156 | 1.521242827 | 1.39E-98    | 1.42E-96    |
| ENSDARG000000023952 | fam167ab         | 2.869775272 | 1.520937766 | 5.54E-47    | 1.48E-45    |
| ENSDARG000000027428 | rpp30            | 2.869662406 | 1.520881025 | 3.00E-41    | 6.46E-40    |
| ENSDARG000000028688 | exosc2           | 2.864311345 | 1.518188319 | 9.35E-94    | 8.65E-92    |
| ENSDARG000000038969 | zgc:113142       | 2.863283753 | 1.517670649 | 2.14E-10    | 1.01E-09    |
| ENSDARG000000019001 | ak7a             | 2.859874106 | 1.51595164  | 7.15E-43    | 1.67E-41    |
| ENSDARG000000023299 | nhp2l1b          | 2.859851539 | 1.515940256 | 5.12E-101   | 5.47E-99    |
| ENSDARG000000081270 | rn7sk            | 2.859816507 | 1.515922583 | 1.42E-53    | 4.71E-52    |
| ENSDARG000000014329 | npm1a            | 2.858832972 | 1.515426333 | 4.12E-49    | 1.18E-47    |
| ENSDARG000000024416 | twistnb          | 2.854205173 | 1.513089046 | 2.88E-70    | 1.49E-68    |
| ENSDARG000000076330 | dusp12           | 2.85247919  | 1.512216362 | 3.91E-31    | 5.61E-30    |
| ENSDARG000000038538 | ccdc37           | 2.851567816 | 1.511755343 | 1.13E-10    | 5.42E-10    |
| ENSDARG000000070477 | dnajc2           | 2.850908227 | 1.511421599 | 6.13E-103   | 6.80E-101   |
| ENSDARG000000091075 | HGH1 (2 of 2)    | 2.850178531 | 1.51105229  | 4.85E-34    | 7.80E-33    |
| ENSDARG000000032963 | her12            | 2.849133326 | 1.510523134 | 7.60E-91    | 6.31E-89    |
| ENSDARG000000038312 | rcl1             | 2.846348377 | 1.50911225  | 9.30E-86    | 6.90E-84    |
| ENSDARG000000004232 | dlb              | 2.842510474 | 1.507165665 | 6.15E-75    | 3.57E-73    |
| ENSDARG000000043960 | rpf2             | 2.842170065 | 1.506992882 | 1.13E-100   | 1.20E-98    |
| ENSDARG000000061081 | arpp21           | 2.838165454 | 1.504958695 | 1.28E-90    | 1.06E-88    |
| ENSDARG000000088436 | CT956064.3       | 2.837362533 | 1.504550497 | 1.69E-81    | 1.16E-79    |
| ENSDARG000000004082 | cx39.9           | 2.837169657 | 1.504452424 | 4.48E-91    | 3.77E-89    |
| ENSDARG000000005616 | bfb              | 2.836077018 | 1.503896712 | 6.27E-08    | 2.42E-07    |

|                    |                    |             |             |             |             |
|--------------------|--------------------|-------------|-------------|-------------|-------------|
| ENSDARG00000059269 | PRTG (2 of 2)      | 2.835463004 | 1.503584333 | 2.97E-13    | 1.71E-12    |
| ENSDARG00000021579 | orc5               | 2.83248785  | 1.502069768 | 2.87E-69    | 1.43E-67    |
| ENSDARG00000077571 | zgc:174862         | 2.831593563 | 1.501614201 | 5.76E-64    | 2.50E-62    |
| ENSDARG00000091068 | CABZ01063789.1     | 2.83107113  | 1.501347997 | 1.97E-13    | 1.14E-12    |
| ENSDARG00000035427 | surf6              | 2.8242934   | 1.49788997  | 3.44E-81    | 2.34E-79    |
| ENSDARG00000008805 | orc3               | 2.823763296 | 1.497619159 | 1.20E-89    | 9.65E-88    |
| ENSDARG00000022728 | rbm34              | 2.813379207 | 1.492304022 | 5.01E-92    | 4.42E-90    |
| ENSDARG00000095115 | zgc:171759         | 2.81098995  | 1.491078296 | 0.001138075 | 0.002785676 |
| ENSDARG00000077346 | CABZ01064799.1     | 2.807210423 | 1.48913721  | 0.008295466 | 0.017828976 |
| ENSDARG00000069563 |                    | 2.801270855 | 1.486081484 | 1.69E-10    | 8.02E-10    |
| ENSDARG00000035257 | akr1a1a            | 2.800211452 | 1.485535773 | 2.70E-58    | 1.03E-56    |
| ENSDARG00000063627 | bop1               | 2.795807462 | 1.48326501  | 6.77E-100   | 7.02E-98    |
| ENSDARG00000097883 | si:ch211-196c10.14 | 2.792865168 | 1.481745926 | 8.80E-17    | 6.34E-16    |
| ENSDARG00000058337 | nop58              | 2.79191505  | 1.481255045 | 2.72E-68    | 1.33E-66    |
| ENSDARG00000077264 | wdr43              | 2.789256832 | 1.479880782 | 4.68E-73    | 2.61E-71    |
| ENSDARG00000040284 | si:dkey-79d12.5    | 2.782828891 | 1.476552204 | 3.87E-48    | 1.07E-46    |
| ENSDARG00000017360 | col5a3a            | 2.782623441 | 1.476445689 | 9.74E-39    | 1.90E-37    |
| ENSDARG00000007918 | ttc27              | 2.776402949 | 1.473216967 | 5.19E-97    | 5.17E-95    |
| ENSDARG00000091931 | gpatch4            | 2.775620588 | 1.472810373 | 5.88E-56    | 2.12E-54    |
| ENSDARG00000000516 | ankar              | 2.773671301 | 1.471796828 | 8.33E-06    | 2.63E-05    |
| ENSDARG00000006863 | CCDC108            | 2.773358675 | 1.471634211 | 4.14E-17    | 3.04E-16    |
| ENSDARG00000097044 | si:dkey-14d8.24    | 2.771358903 | 1.470593558 | 1.11E-05    | 3.48E-05    |
| ENSDARG00000038668 | gbp1               | 2.770357439 | 1.470072129 | 4.58E-50    | 1.35E-48    |
| ENSDARG00000008174 | hoxb1a             | 2.769964238 | 1.46986735  | 3.48E-23    | 3.54E-22    |
| ENSDARG00000078214 | MYBBP1A (2 of 2)   | 2.765072292 | 1.4673172   | 4.77E-51    | 1.45E-49    |
| ENSDARG00000087315 | CT956064.2         | 2.764166071 | 1.466844295 | 0.008344416 | 0.017923337 |
| ENSDARG00000036076 | heatr3             | 2.762794305 | 1.466128155 | 8.32E-96    | 8.13E-94    |
| ENSDARG00000026218 | slc1a3a            | 2.756369127 | 1.462769104 | 8.07E-89    | 6.41E-87    |
| ENSDARG00000038027 | nol12              | 2.754159367 | 1.461612042 | 2.77E-63    | 1.19E-61    |
| ENSDARG00000090419 | CABZ01078499.2     | 2.752693842 | 1.46084416  | 0.000355386 | 0.000932133 |

|                    |                   |             |             |             |             |
|--------------------|-------------------|-------------|-------------|-------------|-------------|
| ENSDARG00000075654 | ccdc135           | 2.750127706 | 1.459498614 | 2.01E-28    | 2.55E-27    |
| ENSDARG00000092272 | si:dkey-248g17.3  | 2.749788836 | 1.459320834 | 3.69E-11    | 1.84E-10    |
| ENSDARG00000070127 | nfx1              | 2.749774415 | 1.459313268 | 1.23E-95    | 1.18E-93    |
| ENSDARG00000075157 | bicc2             | 2.749349041 | 1.459090075 | 1.40E-31    | 2.05E-30    |
| ENSDARG00000030893 | zgc:154142        | 2.748269364 | 1.458523413 | 0.000412786 | 0.00107384  |
| ENSDARG00000044676 | GADD45G (3 of 3)  | 2.744692383 | 1.456644465 | 6.35E-52    | 1.99E-50    |
| ENSDARG00000097984 | si:ch211-277b21.2 | 2.737606775 | 1.452915236 | 0.001370523 | 0.003319184 |
| ENSDARG00000053225 | gnl2              | 2.737560931 | 1.452891076 | 1.22E-96    | 1.20E-94    |
| ENSDARG00000041493 | ipo4              | 2.734768136 | 1.451418521 | 1.22E-96    | 1.20E-94    |
| ENSDARG00000079720 | HPDL              | 2.733009551 | 1.450490501 | 1.46E-43    | 3.49E-42    |
| ENSDARG00000037402 | lim2.3            | 2.732885601 | 1.45042507  | 6.23E-91    | 5.21E-89    |
| ENSDARG00000086810 | msh3              | 2.731741536 | 1.449820989 | 3.59E-19    | 2.96E-18    |
| ENSDARG00000091003 | il34              | 2.731515333 | 1.449701521 | 0.006957803 | 0.015168577 |
| ENSDARG00000016999 | lin28a            | 2.725983218 | 1.44677668  | 1.12E-37    | 2.08E-36    |
| ENSDARG00000010591 | foxn4             | 2.723425651 | 1.445422482 | 1.51E-93    | 1.37E-91    |
| ENSDARG00000061480 |                   | 2.718066222 | 1.442580606 | 0.002483446 | 0.005791853 |
| ENSDARG00000062612 | dhx37             | 2.716569075 | 1.441785731 | 8.05E-92    | 7.02E-90    |
| ENSDARG00000090840 |                   | 2.712996957 | 1.43988743  | 2.84E-06    | 9.42E-06    |
| ENSDARG00000030722 | xirp1             | 2.711367213 | 1.439020517 | 8.03E-95    | 7.66E-93    |
| ENSDARG00000045348 | NUP54             | 2.710055094 | 1.438322181 | 1.33E-93    | 1.22E-91    |
| ENSDARG00000056888 | DNAH8             | 2.709980929 | 1.438282699 | 1.79E-41    | 3.90E-40    |
| ENSDARG00000087309 | CABZ01045618.1    | 2.709738081 | 1.438153409 | 1.88E-14    | 1.17E-13    |
| ENSDARG00000041492 | si:ch211-196f5.2  | 2.709285119 | 1.437912228 | 4.70E-09    | 2.00E-08    |
| ENSDARG00000036070 | znrd1             | 2.709103812 | 1.437815678 | 2.03E-35    | 3.47E-34    |
| ENSDARG00000028976 | pus3              | 2.707176603 | 1.436789005 | 1.20E-36    | 2.15E-35    |
| ENSDARG00000057080 | dnajc21           | 2.703432822 | 1.434792507 | 6.60E-83    | 4.69E-81    |
| ENSDARG00000091983 | si:ch73-249k16.1  | 2.701400735 | 1.43370767  | 9.15E-20    | 7.79E-19    |
| ENSDARG00000076843 | BX649262.1        | 2.700925396 | 1.433453791 | 2.40E-07    | 8.86E-07    |
| ENSDARG00000016391 | calcoco1b         | 2.700425316 | 1.433186649 | 2.96E-05    | 8.86E-05    |
| ENSDARG00000029596 | trim55a           | 2.697495675 | 1.431620647 | 5.77E-86    | 4.31E-84    |

|                     |                 |             |             |             |             |
|---------------------|-----------------|-------------|-------------|-------------|-------------|
| ENSDARG00000008333  | znfl2a          | 2.694575689 | 1.430058112 | 6.72E-15    | 4.30E-14    |
| ENSDARG00000002487  | noc3l           | 2.694560176 | 1.430049806 | 3.34E-93    | 2.98E-91    |
| ENSDARG000000022560 | clcnk           | 2.690312454 | 1.427773737 | 9.92E-11    | 4.79E-10    |
| ENSDARG000000069675 | her8.2          | 2.689959122 | 1.427584249 | 6.91E-55    | 2.40E-53    |
| ENSDARG000000073876 |                 | 2.689643328 | 1.427414871 | 2.14E-11    | 1.09E-10    |
| ENSDARG000000092033 | si:dkey-239h2.3 | 2.689478323 | 1.427326361 | 3.72E-37    | 6.79E-36    |
| ENSDARG000000003564 | dohh            | 2.689099928 | 1.427123367 | 2.88E-68    | 1.41E-66    |
| ENSDARG000000039486 | bag3            | 2.688492059 | 1.42679721  | 3.87E-83    | 2.76E-81    |
| ENSDARG000000005574 | vsx2            | 2.686833545 | 1.425906946 | 8.03E-92    | 7.02E-90    |
| ENSDARG000000030789 | ddx18           | 2.686362659 | 1.425654082 | 2.86E-82    | 2.01E-80    |
| ENSDARG000000037178 | zic2b           | 2.681098286 | 1.422824108 | 1.33E-83    | 9.58E-82    |
| ENSDARG000000076761 | ftsj            | 2.680327618 | 1.422409353 | 3.35E-89    | 2.68E-87    |
| ENSDARG000000043323 | lnx1            | 2.678658266 | 1.421510539 | 7.30E-92    | 6.42E-90    |
| ENSDARG000000090904 | RNF219          | 2.677733601 | 1.421012439 | 9.94E-20    | 8.44E-19    |
| ENSDARG000000062262 | ednrab          | 2.677384209 | 1.420824183 | 2.58E-08    | 1.03E-07    |
| ENSDARG000000029722 | hmgb2a          | 2.676224415 | 1.420199098 | 0.004910356 | 0.01096236  |
| ENSDARG000000040557 | exosc5          | 2.673855563 | 1.418921536 | 4.09E-58    | 1.54E-56    |
| ENSDARG000000035253 | npr3            | 2.671296195 | 1.417539952 | 3.79E-90    | 3.09E-88    |
| ENSDARG000000089658 | si:dkey-26i24.1 | 2.667946698 | 1.415729844 | 0.005264764 | 0.011703    |
| ENSDARG000000045562 | pus1            | 2.665676462 | 1.414501689 | 6.40E-57    | 2.34E-55    |
| ENSDARG000000020133 | jdp2            | 2.66237112  | 1.412711689 | 3.16E-39    | 6.32E-38    |
| ENSDARG000000068657 | irgq2           | 2.661764169 | 1.412382755 | 1.09E-05    | 3.41E-05    |
| ENSDARG000000019742 | tlr4ba          | 2.655970035 | 1.40923887  | 0.000584432 | 0.001488079 |
| ENSDARG000000077567 | angel1          | 2.655454809 | 1.408958977 | 9.60E-10    | 4.31E-09    |
| ENSDARG000000078533 | poc1a           | 2.653393138 | 1.407838447 | 3.23E-20    | 2.82E-19    |
| ENSDARG000000037109 | pwp2h           | 2.652531342 | 1.407369798 | 2.23E-90    | 1.83E-88    |
| ENSDARG000000056617 | rpgra           | 2.64679812  | 1.40424816  | 6.85E-05    | 0.000196913 |
| ENSDARG000000069583 | CNDP1           | 2.645605518 | 1.40359796  | 2.72E-64    | 1.19E-62    |
| ENSDARG000000086647 | chrng           | 2.645258241 | 1.403408571 | 4.88E-43    | 1.15E-41    |
| ENSDARG000000063076 | atrip           | 2.644154418 | 1.402806432 | 6.58E-75    | 3.82E-73    |

|                    |                    |             |             |             |             |
|--------------------|--------------------|-------------|-------------|-------------|-------------|
| ENSDARG00000056729 | her4.2             | 2.641798598 | 1.401520485 | 2.86E-74    | 1.64E-72    |
| ENSDARG00000079462 | PTGES3L            | 2.64086612  | 1.401011165 | 1.09E-60    | 4.38E-59    |
| ENSDARG00000015921 | pwp1               | 2.636684504 | 1.398724954 | 2.25E-87    | 1.74E-85    |
| ENSDARG00000069977 | C11H12orf10        | 2.632895902 | 1.396650482 | 2.64E-84    | 1.92E-82    |
| ENSDARG00000086481 | mogat3a            | 2.632388155 | 1.396372236 | 1.80E-51    | 5.55E-50    |
| ENSDARG00000041617 | nme5               | 2.627502926 | 1.393692371 | 1.09E-13    | 6.45E-13    |
| ENSDARG00000077387 | tcte1              | 2.624784677 | 1.392199077 | 0.000283095 | 0.000750825 |
| ENSDARG00000096037 | si:ch211-214j24.14 | 2.621461484 | 1.390371349 | 1.28E-69    | 6.47E-68    |
| ENSDARG00000097058 | si:ch211-60j9.3    | 2.620845572 | 1.390032348 | 2.29E-08    | 9.20E-08    |
| ENSDARG00000038374 | ccdc137            | 2.620433464 | 1.389805478 | 1.62E-72    | 8.85E-71    |
| ENSDARG00000038664 | pole2              | 2.617897359 | 1.388408534 | 1.69E-54    | 5.81E-53    |
| ENSDARG00000020354 | lmx1a              | 2.617415662 | 1.388143052 | 0.000554776 | 0.00141663  |
| ENSDARG00000097762 | si:dkey-33c14.2    | 2.6169239   | 1.387871972 | 0.014938391 | 0.030714561 |
| ENSDARG00000094570 | si:ch211-226h7.2   | 2.616275019 | 1.387514203 | 1.49E-07    | 5.59E-07    |
| ENSDARG00000078347 | DCSTAMP            | 2.615886849 | 1.387300138 | 0.010325682 | 0.021842139 |
| ENSDARG00000043322 | gsx2               | 2.615329682 | 1.38699282  | 2.00E-42    | 4.57E-41    |
| ENSDARG00000053117 | cpeb1a             | 2.607340519 | 1.382579011 | 0.017207261 | 0.034959593 |
| ENSDARG00000045625 | thumpd1            | 2.606481213 | 1.382103461 | 3.06E-74    | 1.74E-72    |
| ENSDARG00000051762 | DNAJA4             | 2.606366272 | 1.38203984  | 9.13E-87    | 7.00E-85    |
| ENSDARG00000088132 | HEATR2 (2 of 2)    | 2.603618255 | 1.380517935 | 1.01E-19    | 8.60E-19    |
| ENSDARG00000042900 | gtpbp1l            | 2.602346483 | 1.379813059 | 3.68E-79    | 2.39E-77    |
| ENSDARG00000044325 | zgc:193690         | 2.601215758 | 1.379186069 | 2.29E-11    | 1.16E-10    |
| ENSDARG00000020642 | gtdc1              | 2.600868705 | 1.378993572 | 1.71E-38    | 3.30E-37    |
| ENSDARG00000077193 | nags               | 2.600793053 | 1.378951607 | 5.44E-10    | 2.49E-09    |
| ENSDARG00000043304 | nop2               | 2.597169025 | 1.376939909 | 6.69E-86    | 4.97E-84    |
| ENSDARG00000078579 | zgc:175280         | 2.59615478  | 1.376376398 | 1.34E-13    | 7.86E-13    |
| ENSDARG00000060127 | adamts3            | 2.594288879 | 1.375339135 | 1.67E-60    | 6.71E-59    |
| ENSDARG00000062502 | CU571162.1         | 2.59371893  | 1.375022149 | 4.36E-11    | 2.16E-10    |
| ENSDARG00000040478 | lrp2bp             | 2.59003877  | 1.372973694 | 2.92E-05    | 8.74E-05    |
| ENSDARG00000040623 | fosl2              | 2.589337589 | 1.372583071 | 3.62E-85    | 2.67E-83    |

|                    |                   |             |             |             |             |
|--------------------|-------------------|-------------|-------------|-------------|-------------|
| ENSDARG00000004806 | grwd1             | 2.589067069 | 1.372432338 | 1.38E-80    | 9.31E-79    |
| ENSDARG00000077760 | ascc1             | 2.588549912 | 1.372144136 | 3.51E-22    | 3.38E-21    |
| ENSDARG00000089922 | DSN1              | 2.585711488 | 1.370561309 | 6.38E-69    | 3.17E-67    |
| ENSDARG00000086850 | CABZ01089385.1    | 2.584701231 | 1.369997527 | 1.57E-15    | 1.04E-14    |
| ENSDARG00000037570 | polr1d            | 2.579614833 | 1.36715567  | 4.58E-50    | 1.35E-48    |
| ENSDARG00000068884 | FBXO16 (2 of 2)   | 2.577712619 | 1.366091431 | 0.013045921 | 0.027126533 |
| ENSDARG00000052610 | olig4             | 2.576734638 | 1.365543971 | 1.18E-50    | 3.54E-49    |
| ENSDARG00000007531 | zcchc9            | 2.576190855 | 1.365239478 | 4.61E-51    | 1.41E-49    |
| ENSDARG00000057105 | nle1              | 2.574369197 | 1.364218969 | 1.06E-65    | 4.85E-64    |
| ENSDARG00000094388 | celsr2            | 2.573937665 | 1.363977115 | 5.54E-24    | 5.83E-23    |
| ENSDARG00000088984 | azi1              | 2.569795272 | 1.361653429 | 4.59E-80    | 3.06E-78    |
| ENSDARG00000091905 | si:dkey-108k21.21 | 2.569678114 | 1.361587654 | 0.002827992 | 0.006549167 |
| ENSDARG00000078728 | zgc:173710        | 2.566832985 | 1.359989428 | 1.69E-07    | 6.31E-07    |
| ENSDARG00000009822 | her4.4            | 2.566249926 | 1.35966168  | 9.71E-57    | 3.52E-55    |
| ENSDARG00000034559 | srpx2             | 2.564989756 | 1.358953064 | 6.39E-09    | 2.69E-08    |
| ENSDARG00000052480 | pdcd11            | 2.562020874 | 1.35728223  | 4.57E-67    | 2.18E-65    |
| ENSDARG00000097914 | si:dkey-25e11.13  | 2.56155329  | 1.357018905 | 0.004405152 | 0.009909237 |
| ENSDARG00000036816 | pou2f2a           | 2.560300804 | 1.356313319 | 2.86E-72    | 1.55E-70    |
| ENSDARG00000013926 | slc16a9a          | 2.560033297 | 1.356162575 | 2.65E-27    | 3.23E-26    |
| ENSDARG00000044671 | wfikkn1           | 2.559563279 | 1.355897674 | 0.005097316 | 0.011350317 |
| ENSDARG00000005128 | rnaseh2b          | 2.558911221 | 1.355530095 | 3.66E-74    | 2.07E-72    |
| ENSDARG00000059386 | dtwd1             | 2.558383232 | 1.355232388 | 8.28E-34    | 1.32E-32    |
| ENSDARG00000075551 | si:ch211-274p24.3 | 2.554256636 | 1.352903485 | 1.72E-51    | 5.32E-50    |
| ENSDARG00000068288 | LAMC2             | 2.553988887 | 1.352752247 | 2.60E-27    | 3.17E-26    |
| ENSDARG00000021913 | ak9               | 2.551937235 | 1.351592847 | 2.98E-19    | 2.47E-18    |
| ENSDARG00000076927 | DUSP27            | 2.551413938 | 1.351296979 | 8.78E-85    | 6.43E-83    |
| ENSDARG00000035507 | ddx31             | 2.548888172 | 1.349868079 | 3.15E-48    | 8.75E-47    |
| ENSDARG00000001057 | bysl              | 2.548334388 | 1.349554598 | 1.35E-69    | 6.81E-68    |
| ENSDARG00000087815 | pop1              | 2.548129138 | 1.349438394 | 1.73E-37    | 3.19E-36    |
| ENSDARG00000075261 | timp2b            | 2.548061452 | 1.349400072 | 4.35E-80    | 2.91E-78    |

|                     |                   |             |             |             |             |
|---------------------|-------------------|-------------|-------------|-------------|-------------|
| ENSDARG00000090786  | ybey              | 2.547944871 | 1.349334063 | 1.82E-15    | 1.20E-14    |
| ENSDARG00000007217  | wdr55             | 2.547653832 | 1.349169262 | 2.75E-40    | 5.73E-39    |
| ENSDARG000000031795 | abcf1             | 2.544166794 | 1.347193256 | 3.55E-37    | 6.50E-36    |
| ENSDARG000000010978 | trmt1             | 2.541256715 | 1.345542122 | 1.66E-55    | 5.88E-54    |
| ENSDARG000000025017 | prdm8             | 2.540523445 | 1.345125778 | 5.29E-66    | 2.44E-64    |
| ENSDARG000000060634 | azi1              | 2.540141572 | 1.344908906 | 1.05E-42    | 2.42E-41    |
| ENSDARG000000006978 | zak               | 2.536027245 | 1.342570245 | 3.42E-19    | 2.83E-18    |
| ENSDARG000000089836 | MRPS12 (2 of 2)   | 2.53510059  | 1.342042993 | 3.00E-30    | 4.12E-29    |
| ENSDARG000000067701 | myoz3a            | 2.534125214 | 1.341487811 | 3.60E-46    | 9.36E-45    |
| ENSDARG000000054540 | imp4              | 2.53354548  | 1.341157727 | 4.85E-66    | 2.24E-64    |
| ENSDARG000000005619 | nek2              | 2.531070044 | 1.339747433 | 1.98E-41    | 4.30E-40    |
| ENSDARG000000011079 | wdr3              | 2.529681556 | 1.338955785 | 1.04E-75    | 6.22E-74    |
| ENSDARG000000086411 | SRSF10 (2 of 2)   | 2.527989616 | 1.337990537 | 1.66E-80    | 1.12E-78    |
| ENSDARG000000029172 | polr1a            | 2.527408944 | 1.337659117 | 8.68E-81    | 5.90E-79    |
| ENSDARG000000039400 | polr1c            | 2.525947978 | 1.336824927 | 1.61E-62    | 6.83E-61    |
| ENSDARG000000044002 | cyp2x7            | 2.524903377 | 1.33622818  | 1.92E-58    | 7.32E-57    |
| ENSDARG000000037946 | prl               | 2.524882004 | 1.336215968 | 3.05E-31    | 4.41E-30    |
| ENSDARG000000023002 | dtl               | 2.523758855 | 1.335574068 | 1.10E-51    | 3.42E-50    |
| ENSDARG000000021547 | vrk2              | 2.523104036 | 1.335199695 | 8.33E-25    | 9.12E-24    |
| ENSDARG000000035560 | capga             | 2.521170125 | 1.334093473 | 0.004493847 | 0.010096764 |
| ENSDARG000000020232 | eif6              | 2.52014532  | 1.333506927 | 3.21E-80    | 2.15E-78    |
| ENSDARG000000044400 | wdr78             | 2.51945455  | 1.333111431 | 3.91E-10    | 1.81E-09    |
| ENSDARG000000038205 | her2              | 2.517255464 | 1.331851636 | 5.89E-50    | 1.74E-48    |
| ENSDARG000000070546 | msh1              | 2.515570909 | 1.330885857 | 0.022091768 | 0.043870101 |
| ENSDARG000000094614 | si:dkeyp-69b9.2   | 2.515204575 | 1.330675747 | 3.67E-15    | 2.39E-14    |
| ENSDARG000000074116 |                   | 2.514950743 | 1.330530144 | 1.42E-08    | 5.82E-08    |
| ENSDARG000000096282 | notch1a           | 2.514559412 | 1.330305641 | 9.33E-25    | 1.02E-23    |
| ENSDARG000000052331 | BX322787.1        | 2.513488076 | 1.329690845 | 4.86E-44    | 1.19E-42    |
| ENSDARG000000007277 | myf5              | 2.512598648 | 1.32918024  | 5.71E-32    | 8.44E-31    |
| ENSDARG000000097721 | si:dkey-234i14.21 | 2.511814142 | 1.328729718 | 0.002007543 | 0.004753756 |



|                    |                  |             |             |             |             |
|--------------------|------------------|-------------|-------------|-------------|-------------|
| ENSDARG00000075714 | C5H11orf88       | 2.511694259 | 1.32866086  | 7.33E-07    | 2.58E-06    |
| ENSDARG00000091663 |                  | 2.510943983 | 1.328229844 | 4.13E-11    | 2.05E-10    |
| ENSDARG00000015599 | xrcc5            | 2.509967074 | 1.327668439 | 1.97E-81    | 1.35E-79    |
| ENSDARG00000056914 | EMG1             | 2.508608805 | 1.326887513 | 2.18E-53    | 7.20E-52    |
| ENSDARG00000037844 | kdm8             | 2.50841135  | 1.326773953 | 3.27E-23    | 3.34E-22    |
| ENSDARG00000020595 | gnl3l            | 2.50812067  | 1.32660676  | 1.33E-78    | 8.55E-77    |
| ENSDARG00000007955 | iars             | 2.503891879 | 1.324172266 | 1.46E-40    | 3.07E-39    |
| ENSDARG00000040569 | tgm1l4           | 2.501394454 | 1.322732579 | 3.43E-29    | 4.52E-28    |
| ENSDARG00000010347 | acer1            | 2.50080017  | 1.322389781 | 7.42E-36    | 1.29E-34    |
| ENSDARG00000016725 | GADD45G (1 of 3) | 2.498914914 | 1.32130178  | 3.88E-76    | 2.35E-74    |
| ENSDARG00000040666 | nifk             | 2.498244651 | 1.320914766 | 3.40E-80    | 2.28E-78    |
| ENSDARG00000075700 | ZSWIM2           | 2.49787724  | 1.320702577 | 0.000721909 | 0.001817115 |
| ENSDARG00000097507 | si:dkey-14d8.23  | 2.496057762 | 1.319651321 | 1.36E-09    | 6.03E-09    |
| ENSDARG00000042835 | tfdp2            | 2.49564016  | 1.319409931 | 6.13E-75    | 3.57E-73    |
| ENSDARG00000006642 | drg2             | 2.495369722 | 1.319253586 | 2.12E-79    | 1.40E-77    |
| ENSDARG00000062632 | duox             | 2.495252902 | 1.319186045 | 5.90E-68    | 2.87E-66    |
| ENSDARG00000035984 | mnx1             | 2.493960853 | 1.31843882  | 9.36E-25    | 1.02E-23    |
| ENSDARG00000038000 | crls1            | 2.493957615 | 1.318436947 | 1.07E-68    | 5.25E-67    |
| ENSDARG00000052734 | hmgcra           | 2.490789374 | 1.31660303  | 3.76E-42    | 8.42E-41    |
| ENSDARG00000078054 | SPDL1            | 2.490509954 | 1.316441177 | 5.97E-70    | 3.04E-68    |
| ENSDARG00000091221 | TTC34            | 2.487399908 | 1.314638473 | 5.33E-05    | 0.000155046 |
| ENSDARG00000024631 | NLRC5            | 2.486686279 | 1.314224508 | 0.000327308 | 0.000862051 |
| ENSDARG00000063451 | CCDC13           | 2.486316144 | 1.314009752 | 8.08E-07    | 2.83E-06    |
| ENSDARG00000070560 | nap1l4a          | 2.486093032 | 1.313880284 | 5.88E-62    | 2.44E-60    |
| ENSDARG00000006394 | mre11a           | 2.485446471 | 1.313505033 | 2.45E-47    | 6.64E-46    |
| ENSDARG00000087529 | ANKLE1           | 2.48525364  | 1.313393098 | 4.60E-80    | 3.06E-78    |
| ENSDARG00000097848 | si:ch73-111k20.3 | 2.48083989  | 1.310828628 | 3.06E-64    | 1.34E-62    |
| ENSDARG00000077403 | col8a1a          | 2.480661482 | 1.310724874 | 4.52E-78    | 2.85E-76    |
| ENSDARG00000086621 | CT583625.1       | 2.480349384 | 1.310543354 | 3.69E-05    | 0.000109173 |
| ENSDARG00000073978 | crabp2a          | 2.480245993 | 1.310483215 | 2.96E-46    | 7.71E-45    |

|                    |                   |             |             |             |             |
|--------------------|-------------------|-------------|-------------|-------------|-------------|
| ENSDARG00000037182 | SURF2             | 2.476836074 | 1.308498389 | 1.65E-53    | 5.46E-52    |
| ENSDARG00000054154 | bms1l             | 2.476585381 | 1.308352359 | 1.45E-70    | 7.52E-69    |
| ENSDARG00000003961 | parp3             | 2.475217023 | 1.307555024 | 1.37E-67    | 6.60E-66    |
| ENSDARG00000055723 | hsp70l            | 2.472351453 | 1.305883842 | 5.90E-18    | 4.52E-17    |
| ENSDARG00000010437 | fam46c            | 2.46920574  | 1.30404705  | 3.03E-70    | 1.56E-68    |
| ENSDARG00000088930 | Metazoa_SRP       | 2.467860976 | 1.303261124 | 0.014155828 | 0.029232469 |
| ENSDARG00000040245 | kpnb3             | 2.467728127 | 1.30318346  | 1.68E-24    | 1.81E-23    |
| ENSDARG00000039069 | slx4ip            | 2.467550225 | 1.30307945  | 5.53E-27    | 6.65E-26    |
| ENSDARG00000007077 | si:dkey-145p14.5  | 2.466822354 | 1.302653825 | 2.79E-75    | 1.63E-73    |
| ENSDARG00000052471 | taf1a             | 2.466679314 | 1.302570167 | 1.80E-45    | 4.60E-44    |
| ENSDARG00000070461 | C17H15orf41       | 2.46595687  | 1.302147567 | 2.70E-21    | 2.49E-20    |
| ENSDARG00000032505 | LYAR              | 2.465188988 | 1.301698251 | 1.54E-71    | 8.19E-70    |
| ENSDARG00000012044 | polr3gla          | 2.463394198 | 1.30064751  | 8.70E-34    | 1.39E-32    |
| ENSDARG00000093977 | si:ch211-220f16.1 | 2.461957743 | 1.299805999 | 0.023995386 | 0.04727695  |
| ENSDARG00000016818 | abcg2d            | 2.460068835 | 1.298698684 | 2.87E-31    | 4.15E-30    |
| ENSDARG00000042990 | cyp2p10           | 2.459528659 | 1.298381866 | 1.75E-20    | 1.55E-19    |
| ENSDARG00000074446 | zgc:173714        | 2.459451022 | 1.298336325 | 0.000995762 | 0.002458727 |
| ENSDARG00000021924 | hsp70.3           | 2.459224099 | 1.298203208 | 4.03E-63    | 1.72E-61    |
| ENSDARG00000074691 | mms22l            | 2.45910305  | 1.298132193 | 7.31E-64    | 3.17E-62    |
| ENSDARG00000016015 | ddx54             | 2.458929922 | 1.29803062  | 1.20E-77    | 7.49E-76    |
| ENSDARG00000090386 | cd3eap            | 2.458134613 | 1.297563923 | 5.31E-40    | 1.09E-38    |
| ENSDARG00000015076 | cx44.1            | 2.456764267 | 1.296759434 | 2.82E-45    | 7.18E-44    |
| ENSDARG00000005846 |                   | 2.45672722  | 1.296737678 | 0.004214538 | 0.009503029 |
| ENSDARG00000079946 | sqlea             | 2.456410595 | 1.296551731 | 3.96E-35    | 6.68E-34    |
| ENSDARG00000074796 | dbf4              | 2.454889419 | 1.29565804  | 2.28E-54    | 7.80E-53    |
| ENSDARG00000033945 | NOP14             | 2.454528689 | 1.29544603  | 6.85E-74    | 3.85E-72    |
| ENSDARG00000095715 | si:ch211-202e12.3 | 2.454206069 | 1.295256391 | 1.61E-69    | 8.05E-68    |
| ENSDARG00000055868 | RSL1D1            | 2.453500741 | 1.294841707 | 2.66E-77    | 1.64E-75    |
| ENSDARG00000053318 | Irrc6             | 2.453190348 | 1.29465918  | 1.41E-11    | 7.25E-11    |
| ENSDARG00000083325 | snoU85            | 2.452654284 | 1.294343892 | 0.008148492 | 0.0175383   |

|                    |                   |             |             |             |             |
|--------------------|-------------------|-------------|-------------|-------------|-------------|
| ENSDARG00000058631 | CABZ01030107.1    | 2.450208185 | 1.292904335 | 8.32E-11    | 4.04E-10    |
| ENSDARG00000059857 | blvra             | 2.450196273 | 1.292897321 | 4.57E-19    | 3.75E-18    |
| ENSDARG00000063285 | ube2t             | 2.449707624 | 1.292609572 | 1.41E-38    | 2.74E-37    |
| ENSDARG00000079257 | gemin5            | 2.449200107 | 1.292310651 | 1.45E-69    | 7.30E-68    |
| ENSDARG00000058480 | chtf18            | 2.448953341 | 1.292165287 | 1.26E-67    | 6.10E-66    |
| ENSDARG00000097890 | si:ch1073-100f3.2 | 2.448831416 | 1.292093458 | 3.70E-24    | 3.92E-23    |
| ENSDARG00000057863 | dnmt5             | 2.445420513 | 1.290082571 | 4.01E-52    | 1.27E-50    |
| ENSDARG00000088321 |                   | 2.445248866 | 1.289981303 | 5.81E-05    | 0.000168234 |
| ENSDARG00000058030 | hspa14            | 2.441935821 | 1.288025284 | 4.71E-77    | 2.90E-75    |
| ENSDARG00000019726 | celsr2            | 2.441072391 | 1.28751508  | 6.44E-76    | 3.87E-74    |
| ENSDARG00000078462 | CABZ01043311.1    | 2.439867777 | 1.286802966 | 2.55E-71    | 1.35E-69    |
| ENSDARG00000044405 | ttc4              | 2.43930986  | 1.286473032 | 2.12E-63    | 9.11E-62    |
| ENSDARG00000042874 | phlda2            | 2.439125056 | 1.286363728 | 1.26E-66    | 5.94E-65    |
| ENSDARG00000079957 | CABZ01066734.1    | 2.437318751 | 1.285294938 | 0.00812939  | 0.017498512 |
| ENSDARG00000062924 | CCDC176 (1 of 2)  | 2.435592132 | 1.284272557 | 0.002053022 | 0.004852147 |
| ENSDARG00000090651 | RFC4 (2 of 2)     | 2.434381226 | 1.283555113 | 1.55E-37    | 2.87E-36    |
| ENSDARG00000003941 | rrs1              | 2.432229391 | 1.2822793   | 4.76E-73    | 2.65E-71    |
| ENSDARG00000061865 | ddx10             | 2.432194604 | 1.282258666 | 1.18E-75    | 6.98E-74    |
| ENSDARG00000079605 | prmt5             | 2.430464489 | 1.281232056 | 7.38E-71    | 3.87E-69    |
| ENSDARG00000026039 | cyp1a             | 2.429638341 | 1.28074158  | 1.43E-49    | 4.18E-48    |
| ENSDARG00000016753 | ipo9              | 2.42938461  | 1.28059091  | 2.64E-70    | 1.37E-68    |
| ENSDARG00000097742 | si:ch73-204p21.5  | 2.428916546 | 1.280312922 | 0.020868557 | 0.041656479 |
| ENSDARG00000097609 | si:ch211-233f10.7 | 2.428177921 | 1.279874137 | 8.89E-07    | 3.10E-06    |
| ENSDARG00000058325 | casp8             | 2.427506928 | 1.279475413 | 4.98E-49    | 1.42E-47    |
| ENSDARG00000021242 | mvp               | 2.426234729 | 1.278719132 | 1.54E-69    | 7.76E-68    |
| ENSDARG00000061509 | BX927282.1        | 2.424276346 | 1.277554162 | 2.07E-09    | 9.02E-09    |
| ENSDARG00000016485 | CCDC39            | 2.422687635 | 1.276608405 | 8.63E-17    | 6.22E-16    |
| ENSDARG00000082242 | SNORA73           | 2.421235477 | 1.275743396 | 1.00E-06    | 3.48E-06    |
| ENSDARG00000009280 | smyd1a            | 2.420947804 | 1.275571975 | 1.29E-33    | 2.05E-32    |
| ENSDARG00000076526 | gar1              | 2.420738063 | 1.27544698  | 1.57E-69    | 7.84E-68    |

|                    |                  |             |             |             |             |
|--------------------|------------------|-------------|-------------|-------------|-------------|
| ENSDARG00000067838 | C20H14orf169     | 2.420321976 | 1.275198983 | 6.97E-72    | 3.74E-70    |
| ENSDARG00000003527 | mak16            | 2.419288526 | 1.274582837 | 1.72E-74    | 9.92E-73    |
| ENSDARG00000090379 | CEP112           | 2.418364169 | 1.274031509 | 0.00024413  | 0.000652613 |
| ENSDARG00000074656 | ctssb.1          | 2.417237111 | 1.273358997 | 1.34E-33    | 2.12E-32    |
| ENSDARG00000020494 | znf330           | 2.416320029 | 1.272811545 | 6.68E-73    | 3.70E-71    |
| ENSDARG00000074487 | CR762483.1       | 2.416048697 | 1.272649534 | 9.68E-14    | 5.74E-13    |
| ENSDARG00000091219 | CABZ01078767.1   | 2.415877389 | 1.272547237 | 0.000802197 | 0.002004862 |
| ENSDARG00000040925 | wnt10b           | 2.415700643 | 1.272441685 | 9.46E-17    | 6.82E-16    |
| ENSDARG00000016304 | tfdp1b           | 2.415064582 | 1.272061769 | 1.55E-72    | 8.49E-71    |
| ENSDARG00000091214 | si:dkey-122c11.4 | 2.414611167 | 1.271790885 | 4.78E-06    | 1.55E-05    |
| ENSDARG00000045683 | ccdc87           | 2.414455302 | 1.271697756 | 5.42E-05    | 0.000157551 |
| ENSDARG00000070657 | pa2g4b           | 2.413618418 | 1.271197611 | 1.96E-36    | 3.48E-35    |
| ENSDARG00000060298 | nin              | 2.412379661 | 1.270456977 | 1.32E-74    | 7.64E-73    |
| ENSDARG00000038386 | ascl1a           | 2.411508972 | 1.269936178 | 1.15E-73    | 6.46E-72    |
| ENSDARG00000038826 | jph1b            | 2.411305846 | 1.269814652 | 5.48E-43    | 1.29E-41    |
| ENSDARG00000021232 | nkx2.7           | 2.410993515 | 1.26962777  | 1.57E-13    | 9.18E-13    |
| ENSDARG00000031976 | nos2b            | 2.410932919 | 1.26959151  | 2.38E-26    | 2.79E-25    |
| ENSDARG00000007216 | abce1            | 2.410457062 | 1.269306731 | 1.74E-36    | 3.10E-35    |
| ENSDARG00000089405 | zgc:112234       | 2.40989706  | 1.268971522 | 4.74E-09    | 2.01E-08    |
| ENSDARG00000079122 | tmx2a            | 2.408729063 | 1.268272126 | 1.27E-34    | 2.09E-33    |
| ENSDARG00000092652 |                  | 2.408504134 | 1.2681374   | 1.94E-05    | 5.91E-05    |
| ENSDARG00000044512 | ca4c             | 2.408262767 | 1.267992814 | 4.65E-05    | 0.000136352 |
| ENSDARG00000030176 | ITGB1BP2         | 2.406911056 | 1.26718283  | 2.51E-70    | 1.30E-68    |
| ENSDARG00000054196 | CR352249.1       | 2.406513827 | 1.266944713 | 3.53E-06    | 1.16E-05    |
| ENSDARG00000095377 | si:ch211-28e16.4 | 2.405046451 | 1.266064759 | 0.000246346 | 0.000657965 |
| ENSDARG00000022399 | ntmt1            | 2.402880375 | 1.264764827 | 3.23E-74    | 1.83E-72    |
| ENSDARG00000087055 | BX842614.1       | 2.401837607 | 1.264138611 | 5.83E-70    | 2.97E-68    |
| ENSDARG00000036894 | AIMP1 (1 of 2)   | 2.401487817 | 1.26392849  | 1.26E-70    | 6.61E-69    |
| ENSDARG00000087418 | VPRBP (2 of 2)   | 2.400340916 | 1.263239324 | 5.18E-54    | 1.74E-52    |
| ENSDARG00000062147 | otc              | 2.399237282 | 1.262575846 | 2.31E-32    | 3.48E-31    |

|                    |                    |             |             |             |             |
|--------------------|--------------------|-------------|-------------|-------------|-------------|
| ENSDARG00000045552 | si:dkey-202b22.6   | 2.398992937 | 1.26242891  | 0.006188091 | 0.013616964 |
| ENSDARG00000094154 | hist2h3c           | 2.398986862 | 1.262425257 | 9.46E-13    | 5.24E-12    |
| ENSDARG00000090908 | CABZ01099881.1     | 2.397669725 | 1.261632944 | 0.01018435  | 0.021575301 |
| ENSDARG00000090371 | BX664721.5         | 2.397482452 | 1.261520256 | 4.52E-44    | 1.11E-42    |
| ENSDARG00000086662 | MYO18B (1 of 4)    | 2.39555459  | 1.26035969  | 3.30E-45    | 8.36E-44    |
| ENSDARG00000097189 | si:ch1073-235i16.2 | 2.395329123 | 1.260223899 | 6.11E-17    | 4.45E-16    |
| ENSDARG00000079907 | ptger4c            | 2.394176343 | 1.259529418 | 0.002576456 | 0.005995974 |
| ENSDARG00000039578 | pa2g4a             | 2.391587018 | 1.257968285 | 5.84E-31    | 8.30E-30    |
| ENSDARG00000088856 | CABZ01078654.1     | 2.391244696 | 1.257761769 | 0.010174635 | 0.021561149 |
| ENSDARG00000055554 | wnt1               | 2.390223639 | 1.257145609 | 8.49E-21    | 7.66E-20    |
| ENSDARG00000094210 | zgc:109934         | 2.389879354 | 1.25693779  | 2.33E-15    | 1.53E-14    |
| ENSDARG00000079031 |                    | 2.387791397 | 1.255676805 | 6.62E-23    | 6.64E-22    |
| ENSDARG00000020077 | nol10              | 2.386527673 | 1.254913065 | 8.01E-73    | 4.41E-71    |
| ENSDARG00000078068 | abcg4b             | 2.385689745 | 1.254406435 | 2.91E-11    | 1.46E-10    |
| ENSDARG00000089426 | nop10              | 2.385602104 | 1.254353435 | 5.16E-64    | 2.25E-62    |
| ENSDARG00000069292 | si:dkeyp-89c11.1   | 2.382435783 | 1.252437328 | 4.43E-32    | 6.59E-31    |
| ENSDARG00000046133 | b3galnt2           | 2.381614261 | 1.251939765 | 2.63E-34    | 4.26E-33    |
| ENSDARG00000089194 | TACO1 (2 of 2)     | 2.380270288 | 1.251125406 | 7.19E-37    | 1.30E-35    |
| ENSDARG00000003217 | urb2               | 2.37916026  | 1.250452455 | 7.69E-70    | 3.90E-68    |
| ENSDARG00000005419 | il1b               | 2.377895851 | 1.249685528 | 3.72E-05    | 0.000109978 |
| ENSDARG00000043877 | mmachc             | 2.377650669 | 1.249536766 | 3.64E-13    | 2.08E-12    |
| ENSDARG00000004774 | wdr36              | 2.377365358 | 1.249363637 | 6.98E-73    | 3.85E-71    |
| ENSDARG00000035852 |                    | 2.375740363 | 1.248377177 | 1.45E-10    | 6.92E-10    |
| ENSDARG00000023062 | cyr61              | 2.375546206 | 1.248259268 | 1.50E-72    | 8.21E-71    |
| ENSDARG00000095082 | BX571811.2         | 2.375175857 | 1.248034334 | 0.022620257 | 0.04482872  |
| ENSDARG00000029179 | foxd1              | 2.373915182 | 1.24726839  | 1.34E-70    | 6.97E-69    |
| ENSDARG00000056720 | utp3               | 2.372034453 | 1.246124964 | 1.90E-66    | 8.94E-65    |
| ENSDARG00000059908 | CCDC86             | 2.371011759 | 1.245502818 | 2.95E-68    | 1.44E-66    |
| ENSDARG00000097523 | si:ch73-364h19.1   | 2.369390682 | 1.2445161   | 6.74E-11    | 3.30E-10    |
| ENSDARG00000093412 | sertad2a           | 2.369254599 | 1.244433238 | 3.92E-33    | 6.10E-32    |

|                    |                  |             |             |             |             |
|--------------------|------------------|-------------|-------------|-------------|-------------|
| ENSDARG00000042520 | UTP14A           | 2.36883461  | 1.244177474 | 3.55E-72    | 1.91E-70    |
| ENSDARG00000041321 | wdr16            | 2.368562711 | 1.24401187  | 7.50E-13    | 4.19E-12    |
| ENSDARG00000027744 | gadd45ba         | 2.368155237 | 1.243763655 | 1.52E-71    | 8.11E-70    |
| ENSDARG00000057973 | dph1             | 2.367846831 | 1.24357576  | 9.68E-42    | 2.13E-40    |
| ENSDARG00000036292 | cdx4             | 2.367605874 | 1.243428941 | 0.00368158  | 0.008377762 |
| ENSDARG00000017696 | diexf            | 2.366642095 | 1.242841545 | 4.21E-71    | 2.21E-69    |
| ENSDARG00000059711 | nol6             | 2.364832169 | 1.2417378   | 2.35E-72    | 1.27E-70    |
| ENSDARG00000016161 | ccdc170          | 2.364703983 | 1.241659596 | 1.03E-06    | 3.58E-06    |
| ENSDARG00000045669 | si:dkey-39a18.1  | 2.363796112 | 1.241105602 | 3.24E-07    | 1.18E-06    |
| ENSDARG00000007709 | adamts8a         | 2.361946161 | 1.23997608  | 1.35E-25    | 1.53E-24    |
| ENSDARG00000054150 | cx23             | 2.361681416 | 1.239814363 | 3.49E-48    | 9.67E-47    |
| ENSDARG00000094627 | DYNLT1 (2 of 2)  | 2.361312591 | 1.239589038 | 0.000797478 | 0.001994257 |
| ENSDARG00000030494 | hfe2             | 2.360368753 | 1.239012265 | 5.42E-42    | 1.21E-40    |
| ENSDARG00000077310 | gpr144           | 2.359940712 | 1.238750616 | 2.58E-59    | 1.01E-57    |
| ENSDARG00000029187 | exosc3           | 2.359896736 | 1.238723732 | 3.05E-61    | 1.24E-59    |
| ENSDARG00000008480 | trmt61a          | 2.359324287 | 1.238373729 | 5.26E-52    | 1.66E-50    |
| ENSDARG00000042737 | slc52a3          | 2.356986361 | 1.23694341  | 1.40E-09    | 6.20E-09    |
| ENSDARG00000062042 | mthfsd           | 2.355501011 | 1.236033951 | 9.29E-07    | 3.23E-06    |
| ENSDARG00000063341 | C2H1orf123       | 2.355481538 | 1.236022025 | 1.13E-65    | 5.17E-64    |
| ENSDARG00000043336 | exosc7           | 2.355036134 | 1.235749196 | 5.70E-50    | 1.68E-48    |
| ENSDARG00000063333 | nup210           | 2.354440709 | 1.235384392 | 1.99E-54    | 6.83E-53    |
| ENSDARG00000067639 | prpf4            | 2.353909222 | 1.235058684 | 3.12E-55    | 1.10E-53    |
| ENSDARG00000018605 | tekt1            | 2.353884742 | 1.23504368  | 0.002059698 | 0.004865497 |
| ENSDARG00000030267 | gtf3aa           | 2.353239661 | 1.234648256 | 5.62E-43    | 1.32E-41    |
| ENSDARG00000093108 | si:ch211-69l10.2 | 2.352217249 | 1.234021313 | 3.55E-12    | 1.89E-11    |
| ENSDARG00000056007 | cyb5d1           | 2.351589907 | 1.233636491 | 9.07E-05    | 0.000257387 |
| ENSDARG00000058968 | haus1            | 2.350161953 | 1.232760178 | 2.55E-34    | 4.15E-33    |
| ENSDARG00000094426 | her4.2           | 2.349740574 | 1.232501483 | 3.60E-65    | 1.62E-63    |
| ENSDARG00000090484 | dnali1           | 2.349660798 | 1.232452501 | 4.39E-06    | 1.43E-05    |
| ENSDARG00000092586 | si:dkey-238o14.6 | 2.34945322  | 1.232325042 | 0.010383655 | 0.021959865 |

|                    |                   |             |             |             |             |
|--------------------|-------------------|-------------|-------------|-------------|-------------|
| ENSDARG00000026395 | rfx4              | 2.348233692 | 1.23157599  | 1.19E-67    | 5.75E-66    |
| ENSDARG00000062978 | ccdc151           | 2.347293178 | 1.230998046 | 1.40E-14    | 8.78E-14    |
| ENSDARG00000090377 | CABZ01003344.1    | 2.346266202 | 1.230366707 | 0.001143888 | 0.002797977 |
| ENSDARG00000016343 | zgc:92518         | 2.345864737 | 1.23011983  | 1.97E-50    | 5.90E-49    |
| ENSDARG00000092362 | hsp70.2           | 2.345491132 | 1.229890046 | 3.44E-38    | 6.54E-37    |
| ENSDARG00000062898 | cep128            | 2.345455463 | 1.229868106 | 3.74E-25    | 4.15E-24    |
| ENSDARG00000055253 | slc12a10.3        | 2.345060411 | 1.229625088 | 1.37E-05    | 4.25E-05    |
| ENSDARG00000014385 | chek1             | 2.34504522  | 1.229615743 | 5.41E-49    | 1.54E-47    |
| ENSDARG00000058782 | si:ch73-242m19.1  | 2.344785995 | 1.229456256 | 2.57E-07    | 9.47E-07    |
| ENSDARG00000007278 | ect2              | 2.342081971 | 1.22779157  | 2.74E-70    | 1.41E-68    |
| ENSDARG00000075517 | MPV17L            | 2.341274773 | 1.227294259 | 2.86E-08    | 1.14E-07    |
| ENSDARG00000090403 | cyp2aa8           | 2.34096274  | 1.227101972 | 3.36E-70    | 1.72E-68    |
| ENSDARG00000096489 | si:dkeyp-227h16.2 | 2.340713607 | 1.226948427 | 3.05E-54    | 1.03E-52    |
| ENSDARG00000011262 | traip             | 2.340178204 | 1.226618395 | 1.14E-39    | 2.30E-38    |
| ENSDARG00000088319 | CABZ01038329.1    | 2.339728522 | 1.226341144 | 1.38E-09    | 6.15E-09    |
| ENSDARG00000004937 | skp2              | 2.339114055 | 1.225962209 | 8.13E-60    | 3.21E-58    |
| ENSDARG00000077607 | dus2              | 2.338383845 | 1.225511767 | 3.74E-50    | 1.11E-48    |
| ENSDARG00000096020 | si:ch211-120c15.3 | 2.338139834 | 1.225361214 | 9.50E-07    | 3.30E-06    |
| ENSDARG00000094484 | si:dkeyp-4f2.5    | 2.337977838 | 1.225261255 | 0.003738566 | 0.00849927  |
| ENSDARG00000071083 | si:dkeyp-34c12.1  | 2.336432409 | 1.224307302 | 0.005055152 | 0.011265257 |
| ENSDARG00000088845 | CABZ01085177.1    | 2.335370186 | 1.223651253 | 0.009543927 | 0.020317045 |
| ENSDARG00000036811 | ifrd2             | 2.335310731 | 1.223614524 | 5.14E-63    | 2.19E-61    |
| ENSDARG00000059294 | marco             | 2.334545802 | 1.223141893 | 2.96E-20    | 2.59E-19    |
| ENSDARG00000056324 | zgc:123295        | 2.33384619  | 1.222709485 | 4.71E-09    | 2.00E-08    |
| ENSDARG00000051855 | gart              | 2.333654465 | 1.222590963 | 3.52E-53    | 1.16E-51    |
| ENSDARG00000075538 | zgc:163061        | 2.333559999 | 1.222532562 | 5.26E-05    | 0.000153032 |
| ENSDARG00000026767 | nol11             | 2.33353613  | 1.222517805 | 1.17E-69    | 5.92E-68    |
| ENSDARG00000039887 | c1qbp             | 2.333451658 | 1.22246558  | 4.23E-58    | 1.59E-56    |
| ENSDARG00000023532 | pinx1             | 2.333379241 | 1.222420806 | 2.57E-61    | 1.05E-59    |
| ENSDARG00000032465 | slc1a8b           | 2.33277767  | 1.222048815 | 0.018143358 | 0.036654382 |

|                     |                    |             |             |             |             |
|---------------------|--------------------|-------------|-------------|-------------|-------------|
| ENSDARG00000058719  | SMC6               | 2.33234861  | 1.221783441 | 1.21E-37    | 2.24E-36    |
| ENSDARG00000006219  | gnl3               | 2.331258242 | 1.221108826 | 3.29E-64    | 1.44E-62    |
| ENSDARG000000055683 | si:ch211-198e20.11 | 2.329606569 | 1.220086329 | 0.000159211 | 0.000437111 |
| ENSDARG000000053535 | lmo7b              | 2.328589744 | 1.219456485 | 1.55E-36    | 2.77E-35    |
| ENSDARG000000087917 | BX649341.1         | 2.327742469 | 1.218931454 | 0.012768071 | 0.026602567 |
| ENSDARG000000090210 |                    | 2.327245844 | 1.218623621 | 0.000452909 | 0.001171036 |
| ENSDARG000000069945 | p2ry12             | 2.326167186 | 1.21795479  | 0.000859853 | 0.002141005 |
| ENSDARG00000004727  | cmss1              | 2.324899675 | 1.217168462 | 2.24E-39    | 4.51E-38    |
| ENSDARG000000094097 | si:ch211-209a2.1   | 2.324162932 | 1.216711211 | 3.68E-38    | 6.97E-37    |
| ENSDARG000000087923 |                    | 2.32410411  | 1.216674697 | 9.83E-15    | 6.22E-14    |
| ENSDARG000000042659 | thyn1              | 2.323640751 | 1.216387037 | 1.40E-25    | 1.58E-24    |
| ENSDARG000000097072 | si:ch211-229g11.6  | 2.323553952 | 1.216333144 | 1.37E-34    | 2.25E-33    |
| ENSDARG000000020289 | pif1               | 2.323263431 | 1.216152748 | 2.31E-48    | 6.46E-47    |
| ENSDARG000000032885 | C11H1orf158        | 2.322878665 | 1.215913797 | 0.0001133   | 0.000317162 |
| ENSDARG000000020527 | nup62l             | 2.322825262 | 1.215880629 | 2.03E-63    | 8.75E-62    |
| ENSDARG000000037617 | ASCC1              | 2.322476623 | 1.215664075 | 4.77E-06    | 1.55E-05    |
| ENSDARG000000086426 | Metazoa_SRP        | 2.321279389 | 1.214920176 | 0.011223717 | 0.023616935 |
| ENSDARG000000053912 | fbl                | 2.320351578 | 1.214343418 | 1.25E-43    | 3.00E-42    |
| ENSDARG000000058053 | serping1           | 2.319455017 | 1.213785867 | 8.01E-35    | 1.33E-33    |
| ENSDARG000000069630 | tat                | 2.31912034  | 1.213577684 | 1.28E-19    | 1.08E-18    |
| ENSDARG000000070770 | her4.3             | 2.318911073 | 1.213447496 | 1.37E-46    | 3.61E-45    |
| ENSDARG000000044220 | kars               | 2.318464253 | 1.213169483 | 7.95E-26    | 9.09E-25    |
| ENSDARG000000021462 | daw1               | 2.318115568 | 1.212952492 | 9.48E-21    | 8.52E-20    |
| ENSDARG000000069435 | ccdc147            | 2.316644382 | 1.212036599 | 9.02E-11    | 4.37E-10    |
| ENSDARG000000087144 | FAM183B            | 2.316320297 | 1.211834761 | 0.000190266 | 0.000516138 |
| ENSDARG000000070061 | gfer               | 2.315414782 | 1.21127066  | 8.63E-45    | 2.17E-43    |
| ENSDARG000000033376 | chchd4             | 2.315374244 | 1.211245402 | 4.00E-59    | 1.56E-57    |
| ENSDARG000000003287 | wdr12              | 2.314171779 | 1.210495958 | 2.50E-62    | 1.05E-60    |
| ENSDARG000000087373 | dnah5              | 2.314008077 | 1.2103939   | 1.49E-23    | 1.54E-22    |
| ENSDARG000000067859 | scospondin         | 2.312896875 | 1.209700942 | 5.95E-26    | 6.86E-25    |



|                    |                |             |             |             |             |
|--------------------|----------------|-------------|-------------|-------------|-------------|
| ENSDARG00000077469 | polr1b         | 2.312136491 | 1.209226566 | 7.56E-59    | 2.92E-57    |
| ENSDARG00000043976 | etf1           | 2.308409213 | 1.206898994 | 2.10E-26    | 2.47E-25    |
| ENSDARG00000070598 | eno4           | 2.307272399 | 1.20618834  | 2.50E-11    | 1.26E-10    |
| ENSDARG00000054980 | ebna1bp2       | 2.306098808 | 1.205454329 | 9.09E-68    | 4.42E-66    |
| ENSDARG00000086922 | zgc:173702     | 2.305626387 | 1.205158752 | 0.007564821 | 0.016372582 |
| ENSDARG00000053136 | b2m            | 2.305384053 | 1.205007109 | 7.44E-13    | 4.15E-12    |
| ENSDARG00000073899 | tmem194a       | 2.304688505 | 1.204571773 | 2.03E-38    | 3.91E-37    |
| ENSDARG00000076518 | mettl1         | 2.304676811 | 1.204564453 | 3.83E-45    | 9.70E-44    |
| ENSDARG00000021339 | cpa5           | 2.304399812 | 1.204391045 | 8.30E-17    | 5.99E-16    |
| ENSDARG00000054530 | rars           | 2.30266121  | 1.203302164 | 4.77E-66    | 2.21E-64    |
| ENSDARG00000042525 | coe2           | 2.302070822 | 1.202932218 | 3.69E-66    | 1.72E-64    |
| ENSDARG00000077265 | WDR89          | 2.301845024 | 1.202790705 | 7.61E-31    | 1.08E-29    |
| ENSDARG00000087013 | cubn           | 2.301134662 | 1.202345412 | 3.62E-43    | 8.57E-42    |
| ENSDARG00000091506 | CABZ01073071.2 | 2.300165488 | 1.201737662 | 4.06E-11    | 2.02E-10    |
| ENSDARG00000069841 | CU596012.2     | 2.299737287 | 1.201469063 | 7.39E-22    | 6.99E-21    |
| ENSDARG00000058479 | zgc:110425     | 2.298639529 | 1.200780242 | 0.001061071 | 0.002610913 |
| ENSDARG00000020169 | fahd2a         | 2.298027112 | 1.200395819 | 1.26E-63    | 5.43E-62    |
| ENSDARG00000031047 | ptrh1          | 2.297696532 | 1.200188267 | 1.07E-34    | 1.76E-33    |
| ENSDARG00000087832 | bcl3           | 2.295167463 | 1.198599421 | 1.03E-08    | 4.27E-08    |
| ENSDARG00000091947 | znf106b        | 2.295125905 | 1.198573299 | 6.53E-19    | 5.30E-18    |
| ENSDARG00000095529 | gusb           | 2.293273809 | 1.197408618 | 2.16E-08    | 8.69E-08    |
| ENSDARG00000076395 | nme8           | 2.292616848 | 1.196995266 | 7.59E-09    | 3.17E-08    |
| ENSDARG00000075169 | bbs1           | 2.292233531 | 1.196754032 | 4.20E-37    | 7.64E-36    |
| ENSDARG00000021566 | OTOP1          | 2.291894899 | 1.196540887 | 3.91E-33    | 6.07E-32    |
| ENSDARG00000040070 | coil           | 2.291887685 | 1.196536346 | 1.40E-36    | 2.51E-35    |
| ENSDARG00000002720 | utp15          | 2.291216016 | 1.196113483 | 4.40E-61    | 1.79E-59    |
| ENSDARG00000011404 | fen1           | 2.288438726 | 1.194363663 | 7.91E-67    | 3.76E-65    |
| ENSDARG00000017983 | rtdr1          | 2.288114899 | 1.1941595   | 5.17E-05    | 0.00015085  |
| ENSDARG00000076896 | C2H10orf67     | 2.287935825 | 1.194046586 | 0.013770637 | 0.028517864 |
| ENSDARG00000042458 | rfc4           | 2.287741239 | 1.193923881 | 1.59E-55    | 5.63E-54    |

|                    |                      |             |             |          |             |
|--------------------|----------------------|-------------|-------------|----------|-------------|
| ENSDARG00000026454 | MIS12                | 2.285810832 | 1.192706015 | 6.02E-43 | 1.41E-41    |
| ENSDARG00000032263 | zgc:110224           | 2.284528551 | 1.191896473 | 6.08E-19 | 4.95E-18    |
| ENSDARG00000097163 | si:dkey-182i1.1      | 2.283602736 | 1.191311696 | 9.51E-05 | 0.000269133 |
| ENSDARG00000043640 | cenpn                | 2.283576695 | 1.191295244 | 2.09E-38 | 4.00E-37    |
| ENSDARG00000039412 | dmrta2               | 2.28277061  | 1.190785894 | 3.93E-38 | 7.43E-37    |
| ENSDARG00000057716 | acrc                 | 2.282228611 | 1.190443314 | 1.03E-41 | 2.26E-40    |
| ENSDARG00000054128 | im:7136021           | 2.281033582 | 1.189687686 | 6.51E-30 | 8.86E-29    |
| ENSDARG00000033579 | mtrf1                | 2.280248558 | 1.189191094 | 9.12E-15 | 5.78E-14    |
| ENSDARG00000057911 | ACTC1 (5 of 6)       | 2.277445855 | 1.187416755 | 1.03E-37 | 1.93E-36    |
| ENSDARG00000087213 | CABZ01053617.1       | 2.277334198 | 1.187346022 | 3.86E-05 | 0.000113969 |
| ENSDARG00000013478 | rrp15                | 2.275775302 | 1.18635812  | 1.55E-52 | 4.96E-51    |
| ENSDARG00000089705 | ABCF3                | 2.273058453 | 1.184634784 | 2.29E-54 | 7.84E-53    |
| ENSDARG00000077407 | C19H18orf21 (2 of 2) | 2.272890913 | 1.184528444 | 1.62E-16 | 1.15E-15    |
| ENSDARG00000097567 | si:dkey-208c12.2     | 2.272446103 | 1.184246078 | 9.21E-05 | 0.000261073 |
| ENSDARG00000040548 | eed                  | 2.271660675 | 1.183747351 | 3.43E-66 | 1.60E-64    |
| ENSDARG00000044010 | lox12a               | 2.271425646 | 1.183598081 | 1.48E-58 | 5.68E-57    |
| ENSDARG00000086021 | si:dkey-20l4.2       | 2.270865633 | 1.183242344 | 1.14E-05 | 3.55E-05    |
| ENSDARG00000012820 | nop56                | 2.270484413 | 1.183000133 | 9.76E-35 | 1.61E-33    |
| ENSDARG00000008022 | kif18a               | 2.270408639 | 1.182951984 | 7.31E-55 | 2.54E-53    |
| ENSDARG00000093019 | si:dkey-83k24.5      | 2.269306339 | 1.182251375 | 7.35E-08 | 2.82E-07    |
| ENSDARG00000079146 | smarcal1             | 2.268431743 | 1.18169525  | 8.94E-43 | 2.08E-41    |
| ENSDARG00000027907 | CR318603.2           | 2.267244913 | 1.180940242 | 3.20E-06 | 1.05E-05    |
| ENSDARG00000054259 | nat10                | 2.266373377 | 1.18038556  | 5.83E-65 | 2.61E-63    |
| ENSDARG00000007628 | dusp1                | 2.26527199  | 1.179684284 | 2.45E-50 | 7.31E-49    |
| ENSDARG00000079973 | pus10                | 2.263282625 | 1.178416751 | 3.57E-42 | 8.01E-41    |
| ENSDARG00000068021 | si:ch211-224b1.4     | 2.262966533 | 1.178215249 | 1.30E-07 | 4.91E-07    |
| ENSDARG00000062568 | MRPL2                | 2.262847764 | 1.178139529 | 7.25E-60 | 2.86E-58    |
| ENSDARG00000061515 | tmtops2a             | 2.26227514  | 1.177774402 | 2.35E-27 | 2.87E-26    |
| ENSDARG00000071500 | fam207a              | 2.261350405 | 1.17718456  | 1.15E-25 | 1.30E-24    |
| ENSDARG00000029859 | C8H1orf228           | 2.260844135 | 1.176861535 | 4.36E-06 | 1.42E-05    |

|                    |                  |             |             |             |             |
|--------------------|------------------|-------------|-------------|-------------|-------------|
| ENSDARG00000078148 | HEATR2 (1 of 2)  | 2.260533852 | 1.176663523 | 7.27E-15    | 4.64E-14    |
| ENSDARG00000054414 | spata17          | 2.260088275 | 1.176379123 | 0.002916213 | 0.006740287 |
| ENSDARG00000045776 | cnbpa            | 2.259570129 | 1.176048334 | 5.24E-37    | 9.50E-36    |
| ENSDARG00000070216 | FANCA            | 2.258767142 | 1.17553555  | 1.06E-37    | 1.98E-36    |
| ENSDARG00000077704 | FUT9 (13 of 16)  | 2.258723743 | 1.17550783  | 0.007046414 | 0.015344815 |
| ENSDARG00000042172 | c7a              | 2.256659269 | 1.174188604 | 9.77E-64    | 4.23E-62    |
| ENSDARG00000097425 | si:dkey-237p10.2 | 2.2556566   | 1.173547449 | 0.014639105 | 0.03015594  |
| ENSDARG00000020028 | cps1             | 2.255209529 | 1.173261479 | 3.97E-48    | 1.10E-46    |
| ENSDARG00000025314 | tcerg1a          | 2.254412501 | 1.172751516 | 9.46E-56    | 3.38E-54    |
| ENSDARG00000075795 | nol7             | 2.253997554 | 1.17248595  | 2.17E-62    | 9.13E-61    |
| ENSDARG00000017355 | rsph9            | 2.253719481 | 1.172307955 | 1.15E-08    | 4.75E-08    |
| ENSDARG00000060992 | rpud2            | 2.253537768 | 1.172191629 | 1.99E-33    | 3.13E-32    |
| ENSDARG00000091806 | CABZ01072244.1   | 2.251783633 | 1.17106821  | 1.72E-57    | 6.39E-56    |
| ENSDARG00000041295 | lim2.5           | 2.250793821 | 1.170433908 | 7.82E-48    | 2.15E-46    |
| ENSDARG00000016337 | lctlb            | 2.250719023 | 1.170385964 | 5.48E-47    | 1.47E-45    |
| ENSDARG00000088619 | REXO4            | 2.250530048 | 1.170264827 | 7.46E-47    | 1.99E-45    |
| ENSDARG00000052721 | PRIM2            | 2.248316991 | 1.168845456 | 3.68E-59    | 1.43E-57    |
| ENSDARG00000043209 | nsun5            | 2.247634074 | 1.168407177 | 3.84E-32    | 5.72E-31    |
| ENSDARG00000044754 | gnrh2            | 2.246525732 | 1.167695587 | 0.000676749 | 0.00170935  |
| ENSDARG00000020913 | ddx56            | 2.246321177 | 1.167564217 | 9.22E-62    | 3.80E-60    |
| ENSDARG00000045019 | aamp             | 2.245371121 | 1.166953917 | 7.44E-61    | 3.00E-59    |
| ENSDARG00000024681 | pane1            | 2.244198578 | 1.166200339 | 3.11E-27    | 3.78E-26    |
| ENSDARG00000018810 | ZCCHC4           | 2.24403142  | 1.166092876 | 6.94E-21    | 6.28E-20    |
| ENSDARG00000040890 | fdps             | 2.243888928 | 1.166001264 | 4.34E-60    | 1.73E-58    |
| ENSDARG00000011648 | snrpd1           | 2.243390847 | 1.165680991 | 3.30E-58    | 1.25E-56    |
| ENSDARG00000095564 | CABZ01118769.1   | 2.243141175 | 1.165520421 | 0.00456302  | 0.010238419 |
| ENSDARG00000092505 | si:dkeyp-80d11.1 | 2.241810772 | 1.164664507 | 0.02277639  | 0.045116117 |
| ENSDARG00000095738 | BX649331.2       | 2.241804818 | 1.164660676 | 0.023917345 | 0.047149347 |
| ENSDARG00000086337 | si:dkey-102g19.3 | 2.241409201 | 1.164406058 | 0.016997485 | 0.034580377 |
| ENSDARG00000027938 | rad18            | 2.241385403 | 1.164390739 | 2.86E-40    | 5.94E-39    |

|                    |                   |             |             |             |             |
|--------------------|-------------------|-------------|-------------|-------------|-------------|
| ENSDARG00000095801 | si:dkey-119g10.4  | 2.239694258 | 1.163301803 | 1.16E-05    | 3.61E-05    |
| ENSDARG00000042864 | rpl7l1            | 2.239577507 | 1.163226596 | 3.07E-62    | 1.28E-60    |
| ENSDARG00000097493 | si:dkey-148h10.5  | 2.239267658 | 1.163026983 | 2.91E-07    | 1.07E-06    |
| ENSDARG00000058389 | ccl-c5a           | 2.236838407 | 1.161461038 | 0.004155759 | 0.009382405 |
| ENSDARG00000093664 | si:dkey-115d18.2  | 2.23583278  | 1.160812292 | 4.32E-08    | 1.69E-07    |
| ENSDARG00000068374 | si:ch211-132b12.7 | 2.235156842 | 1.160376069 | 9.84E-05    | 0.000277855 |
| ENSDARG00000017314 | CELA1 (1 of 7)    | 2.234709237 | 1.160087131 | 3.24E-09    | 1.39E-08    |
| ENSDARG00000082894 | snoR38            | 2.23456676  | 1.159995147 | 0.011033417 | 0.023250945 |
| ENSDARG00000057770 | plp1a             | 2.234021508 | 1.159643075 | 1.29E-60    | 5.16E-59    |
| ENSDARG00000030262 | si:ch211-220i18.4 | 2.233792225 | 1.159495    | 1.33E-14    | 8.35E-14    |
| ENSDARG00000060115 | lrrn1             | 2.233665258 | 1.159412997 | 2.57E-28    | 3.25E-27    |
| ENSDARG00000062900 | RNF115 (2 of 2)   | 2.233307177 | 1.159181698 | 2.05E-25    | 2.30E-24    |
| ENSDARG00000077666 | evi5a             | 2.232878099 | 1.158904491 | 0.001289917 | 0.003132245 |
| ENSDARG00000037432 | haus7             | 2.232699689 | 1.158789214 | 2.67E-42    | 6.04E-41    |
| ENSDARG00000036152 | GAS2 (2 of 2)     | 2.230521993 | 1.157381373 | 1.73E-08    | 7.03E-08    |
| ENSDARG00000043518 | si:dkey-239i20.2  | 2.230205486 | 1.157176643 | 0.000127869 | 0.000355633 |
| ENSDARG00000014274 | rfc2              | 2.230064183 | 1.157085233 | 4.67E-57    | 1.71E-55    |
| ENSDARG00000093569 | bckdhbl           | 2.229981868 | 1.15703198  | 4.91E-54    | 1.65E-52    |
| ENSDARG00000016260 | fxr2              | 2.229269518 | 1.156571048 | 2.66E-40    | 5.55E-39    |
| ENSDARG00000051902 | prmt7             | 2.228979508 | 1.156383354 | 2.88E-55    | 1.01E-53    |
| ENSDARG00000023262 | mapk15            | 2.228805502 | 1.156270725 | 0.002315947 | 0.005423026 |
| ENSDARG00000021997 | C20H6orf165       | 2.228725261 | 1.156218784 | 4.74E-07    | 1.70E-06    |
| ENSDARG00000068755 | exosc8            | 2.227576701 | 1.155475108 | 2.07E-42    | 4.71E-41    |
| ENSDARG00000055739 | ribc1             | 2.22653498  | 1.154800278 | 7.00E-08    | 2.69E-07    |
| ENSDARG00000088160 | CEP295            | 2.226414246 | 1.154722045 | 1.27E-18    | 1.01E-17    |
| ENSDARG00000042725 | cebpb             | 2.225863025 | 1.154364815 | 1.45E-58    | 5.56E-57    |
| ENSDARG00000054224 | IPO11             | 2.225126586 | 1.153887413 | 4.85E-61    | 1.97E-59    |
| ENSDARG00000058212 | ndnl2             | 2.225094353 | 1.153866513 | 2.51E-39    | 5.03E-38    |
| ENSDARG00000054837 | zgc:136870        | 2.224833018 | 1.153697061 | 0.000562628 | 0.001435262 |
| ENSDARG00000029014 | orc4              | 2.224327073 | 1.153368943 | 2.09E-50    | 6.22E-49    |

|                    |                   |             |             |             |             |
|--------------------|-------------------|-------------|-------------|-------------|-------------|
| ENSDARG00000043157 | dnajb13           | 2.224157263 | 1.1532588   | 0.000382383 | 0.000998773 |
| ENSDARG00000026225 | whsc1             | 2.22364157  | 1.152924258 | 2.09E-51    | 6.43E-50    |
| ENSDARG00000095554 | si:ch211-223a21.6 | 2.223532806 | 1.15285369  | 0.004825798 | 0.010789692 |
| ENSDARG00000033726 | tshb              | 2.223160522 | 1.152612121 | 0.000401808 | 0.001046433 |
| ENSDARG00000037708 | exosc10           | 2.223106313 | 1.152576942 | 3.78E-62    | 1.58E-60    |
| ENSDARG00000022122 | cdkal1            | 2.221744384 | 1.151692841 | 4.13E-55    | 1.45E-53    |
| ENSDARG00000067517 | CCDC15            | 2.221036018 | 1.151232789 | 7.02E-13    | 3.92E-12    |
| ENSDARG00000055360 | LLPH              | 2.218468165 | 1.149563851 | 7.56E-59    | 2.92E-57    |
| ENSDARG00000051851 | ctu2              | 2.218345397 | 1.149484011 | 9.91E-31    | 1.39E-29    |
| ENSDARG00000090605 | FILIP1L (2 of 2)  | 2.218050075 | 1.149291937 | 1.47E-09    | 6.51E-09    |
| ENSDARG00000019765 | C1H7orf55         | 2.216093766 | 1.148018925 | 9.34E-49    | 2.64E-47    |
| ENSDARG00000016363 | her8a             | 2.215755079 | 1.14779842  | 3.28E-61    | 1.33E-59    |
| ENSDARG00000038847 | gins3             | 2.215685749 | 1.147753278 | 1.06E-28    | 1.37E-27    |
| ENSDARG00000040159 | wnt4b             | 2.215331833 | 1.147522815 | 1.83E-40    | 3.81E-39    |
| ENSDARG00000007971 | cks1b             | 2.21484113  | 1.147203218 | 1.41E-37    | 2.61E-36    |
| ENSDARG00000058419 | gcn1l1            | 2.214094109 | 1.146716545 | 1.01E-23    | 1.05E-22    |
| ENSDARG00000054446 | ccdc43            | 2.21367394  | 1.146442738 | 1.74E-56    | 6.31E-55    |
| ENSDARG00000077198 | chst12b           | 2.213488296 | 1.146321745 | 0.021928214 | 0.043584914 |
| ENSDARG00000026178 | ube3d             | 2.212690983 | 1.145801983 | 1.22E-20    | 1.09E-19    |
| ENSDARG00000005827 | eif2s1a           | 2.211921847 | 1.145300412 | 1.00E-57    | 3.74E-56    |
| ENSDARG00000068478 | gpx4a             | 2.211904593 | 1.145289158 | 7.89E-38    | 1.48E-36    |
| ENSDARG00000042182 | drc1              | 2.210137733 | 1.144136279 | 1.80E-14    | 1.12E-13    |
| ENSDARG00000087318 | zgc:174688        | 2.209926628 | 1.143998471 | 7.81E-23    | 7.80E-22    |
| ENSDARG00000042285 | atp8b3            | 2.208913803 | 1.143337123 | 8.47E-62    | 3.49E-60    |
| ENSDARG00000092204 | ms4a17a.5         | 2.208077304 | 1.142790681 | 2.12E-06    | 7.11E-06    |
| ENSDARG00000077461 | dhx32a            | 2.207998667 | 1.142739301 | 2.17E-25    | 2.43E-24    |
| ENSDARG00000061763 | spata5l1          | 2.20796189  | 1.142715271 | 8.68E-31    | 1.22E-29    |
| ENSDARG00000069916 | SGOL1             | 2.205983694 | 1.141422127 | 5.67E-61    | 2.30E-59    |
| ENSDARG00000032516 | rrp36             | 2.205807979 | 1.141307206 | 2.23E-42    | 5.05E-41    |
| ENSDARG00000074085 | si:ch1073-188e1.1 | 2.20546046  | 1.141079896 | 8.49E-14    | 5.06E-13    |

|                    |                  |             |             |             |             |
|--------------------|------------------|-------------|-------------|-------------|-------------|
| ENSDARG00000010572 | slc25a25a        | 2.205291035 | 1.140969063 | 9.32E-62    | 3.83E-60    |
| ENSDARG00000036136 | tipin            | 2.205277378 | 1.140960128 | 7.20E-30    | 9.77E-29    |
| ENSDARG00000044125 | txn              | 2.204832099 | 1.140668797 | 2.57E-59    | 1.01E-57    |
| ENSDARG00000033134 | ndufaf7          | 2.204557674 | 1.14048922  | 2.36E-42    | 5.34E-41    |
| ENSDARG00000070311 | rhbdl3           | 2.203972406 | 1.140106161 | 1.98E-33    | 3.12E-32    |
| ENSDARG00000037046 | rad51b           | 2.201605362 | 1.138555889 | 1.97E-08    | 7.97E-08    |
| ENSDARG00000091063 | FANCM (3 of 3)   | 2.200866521 | 1.138071651 | 0.001751075 | 0.004176037 |
| ENSDARG00000068175 | ing5b            | 2.200169021 | 1.137614358 | 7.35E-27    | 8.80E-26    |
| ENSDARG00000042344 | trmt6            | 2.200099181 | 1.137568562 | 4.24E-32    | 6.32E-31    |
| ENSDARG00000071288 | samhd1           | 2.199891763 | 1.137432543 | 2.08E-42    | 4.73E-41    |
| ENSDARG00000005738 | rpf1             | 2.19847034  | 1.136500069 | 1.74E-53    | 5.76E-52    |
| ENSDARG00000071684 | rx1              | 2.198276855 | 1.136373094 | 5.82E-54    | 1.95E-52    |
| ENSDARG00000035458 | atp2a1l          | 2.19793311  | 1.136147481 | 1.57E-12    | 8.58E-12    |
| ENSDARG00000067548 | fgf10b           | 2.197371356 | 1.135778706 | 0.024294432 | 0.047773389 |
| ENSDARG00000056650 | zgc:113276       | 2.196485617 | 1.135197052 | 1.11E-24    | 1.20E-23    |
| ENSDARG00000074565 | PUSL1            | 2.195794731 | 1.134743193 | 6.24E-08    | 2.40E-07    |
| ENSDARG00000038583 | abraa            | 2.193534695 | 1.133257526 | 1.82E-57    | 6.76E-56    |
| ENSDARG00000032005 | ccdc65           | 2.192987873 | 1.132897834 | 8.54E-11    | 4.14E-10    |
| ENSDARG00000033757 | ncaph2           | 2.192943416 | 1.132868587 | 2.03E-55    | 7.18E-54    |
| ENSDARG00000015512 | aqp8b            | 2.192688563 | 1.132700914 | 1.84E-10    | 8.69E-10    |
| ENSDARG00000002830 | trmt2a           | 2.192122739 | 1.132328579 | 2.01E-41    | 4.36E-40    |
| ENSDARG00000001777 | nup155           | 2.191953443 | 1.132217156 | 8.18E-53    | 2.65E-51    |
| ENSDARG00000035730 | utp6             | 2.191714158 | 1.132059655 | 2.98E-58    | 1.13E-56    |
| ENSDARG00000003216 | anxa2a           | 2.190717363 | 1.131403366 | 2.85E-38    | 5.43E-37    |
| ENSDARG00000091946 | si:ch211-139k8.2 | 2.19039354  | 1.131190097 | 1.32E-08    | 5.41E-08    |
| ENSDARG00000056464 | fitm1            | 2.190238027 | 1.131087665 | 1.17E-55    | 4.17E-54    |
| ENSDARG00000025820 | chek2            | 2.189823781 | 1.130814778 | 3.48E-22    | 3.35E-21    |
| ENSDARG00000093389 | CCHCR1 (2 of 2)  | 2.187930497 | 1.129566909 | 1.98E-09    | 8.67E-09    |
| ENSDARG00000029747 | mep1a.1          | 2.184447535 | 1.127268456 | 0.012322588 | 0.02575371  |
| ENSDARG00000040584 | n6amt2           | 2.184323248 | 1.12718637  | 5.03E-38    | 9.48E-37    |

|                    |                    |             |             |             |             |
|--------------------|--------------------|-------------|-------------|-------------|-------------|
| ENSDARG00000022615 | LAMA3 (1 of 2)     | 2.182484431 | 1.125971362 | 1.05E-49    | 3.07E-48    |
| ENSDARG00000029406 | h2afx              | 2.181748624 | 1.125484887 | 3.11E-49    | 8.95E-48    |
| ENSDARG00000040036 | tcf19l             | 2.180589206 | 1.124718011 | 2.48E-27    | 3.03E-26    |
| ENSDARG00000002917 | GLS2 (1 of 2)      | 2.18028547  | 1.124517043 | 0.00049871  | 0.001282224 |
| ENSDARG00000089320 | ccdc175            | 2.180186709 | 1.124451692 | 0.000322896 | 0.000851299 |
| ENSDARG00000019874 | hsph1              | 2.17984223  | 1.124223721 | 2.29E-15    | 1.51E-14    |
| ENSDARG00000061377 | efcab1             | 2.179090229 | 1.123725935 | 2.04E-06    | 6.85E-06    |
| ENSDARG00000059679 | zgc:158343         | 2.178605749 | 1.123405143 | 2.30E-10    | 1.08E-09    |
| ENSDARG00000011133 | ccne1              | 2.177877307 | 1.122922681 | 4.04E-30    | 5.55E-29    |
| ENSDARG00000039934 | hlcs               | 2.177664187 | 1.122781496 | 2.18E-51    | 6.71E-50    |
| ENSDARG00000087466 | DNAH9              | 2.176994918 | 1.12233804  | 5.88E-14    | 3.54E-13    |
| ENSDARG00000079155 | si:ch211-67f13.8   | 2.176591731 | 1.122070823 | 0.01913784  | 0.038474737 |
| ENSDARG00000094376 | NLRP6 (125 of 145) | 2.176571194 | 1.12205721  | 0.019092784 | 0.03839801  |
| ENSDARG00000039345 | drg1               | 2.175885832 | 1.121602861 | 1.19E-58    | 4.57E-57    |
| ENSDARG00000069681 | pcgf6              | 2.174023098 | 1.120367269 | 9.50E-28    | 1.18E-26    |
| ENSDARG00000012899 | ddx49              | 2.172972948 | 1.119670214 | 3.05E-42    | 6.88E-41    |
| ENSDARG00000063596 | wbscr22            | 2.171908365 | 1.118963236 | 2.96E-41    | 6.38E-40    |
| ENSDARG00000027658 | irf10              | 2.170858377 | 1.11826561  | 0.001953187 | 0.004632765 |
| ENSDARG00000002304 | gins2              | 2.169481639 | 1.117350376 | 1.23E-23    | 1.28E-22    |
| ENSDARG00000077179 | ccdc83             | 2.168685345 | 1.116820747 | 0.002621761 | 0.00609442  |
| ENSDARG00000088717 | C6H2orf40 (2 of 2) | 2.168370114 | 1.116611028 | 1.08E-24    | 1.18E-23    |
| ENSDARG00000000349 | C21H11orf70        | 2.168369789 | 1.116610812 | 0.000178188 | 0.000485228 |
| ENSDARG00000038788 | DNAI1 (1 of 2)     | 2.167847254 | 1.116263108 | 1.74E-13    | 1.01E-12    |
| ENSDARG00000088231 | CELSR2 (2 of 2)    | 2.166160407 | 1.115140081 | 3.34E-59    | 1.30E-57    |
| ENSDARG00000018958 | nrarpb             | 2.166041652 | 1.115060985 | 6.10E-59    | 2.36E-57    |
| ENSDARG00000077923 | zgc:174311         | 2.165048596 | 1.114399408 | 0.004472301 | 0.010050739 |
| ENSDARG00000018061 | neil1              | 2.165047503 | 1.11439868  | 9.59E-24    | 9.98E-23    |
| ENSDARG00000073866 | tdp1               | 2.164934543 | 1.114323405 | 7.96E-46    | 2.06E-44    |
| ENSDARG00000039232 | DUSP8 (2 of 2)     | 2.164785116 | 1.114223825 | 8.89E-39    | 1.74E-37    |
| ENSDARG00000063626 | ddx21              | 2.164764392 | 1.114210014 | 1.25E-37    | 2.32E-36    |

|                    |                   |             |             |             |             |
|--------------------|-------------------|-------------|-------------|-------------|-------------|
| ENSDARG00000040178 | havcr1            | 2.163605813 | 1.113437679 | 9.31E-18    | 7.07E-17    |
| ENSDARG00000044143 | nol8              | 2.162801556 | 1.1129013   | 1.06E-48    | 3.00E-47    |
| ENSDARG00000092854 | BX548173.1        | 2.160872772 | 1.111614132 | 0.004071921 | 0.009204829 |
| ENSDARG00000021938 | smad9             | 2.16070382  | 1.111501327 | 4.80E-45    | 1.21E-43    |
| ENSDARG00000035221 | zgc:110249        | 2.160583975 | 1.111421305 | 2.29E-06    | 7.66E-06    |
| ENSDARG00000096986 | si:dkey-14d8.22   | 2.159382911 | 1.110619091 | 0.000618329 | 0.001569464 |
| ENSDARG00000037190 | TRIM47 (16 of 86) | 2.15850882  | 1.110034988 | 1.07E-19    | 9.10E-19    |
| ENSDARG00000004736 | pacrg             | 2.157361143 | 1.109267704 | 0.000226654 | 0.000608574 |
| ENSDARG00000060507 | depdc1b           | 2.157236612 | 1.109184424 | 8.66E-40    | 1.77E-38    |
| ENSDARG00000073711 | mmrn2b            | 2.15692154  | 1.108973698 | 2.39E-54    | 8.14E-53    |
| ENSDARG00000053439 | sec24a            | 2.156716999 | 1.108836881 | 5.64E-33    | 8.71E-32    |
| ENSDARG00000040301 | lrrc20            | 2.156198873 | 1.108490248 | 5.52E-58    | 2.07E-56    |
| ENSDARG00000010316 | qars              | 2.156145468 | 1.108454515 | 2.01E-49    | 5.82E-48    |
| ENSDARG00000075737 | A2ML1 (6 of 12)   | 2.156021689 | 1.108371691 | 0.008409938 | 0.018057249 |
| ENSDARG00000053569 | sox3              | 2.153304362 | 1.106552254 | 2.91E-47    | 7.85E-46    |
| ENSDARG00000069823 | proca1            | 2.153233135 | 1.106504532 | 7.97E-31    | 1.13E-29    |
| ENSDARG00000060316 | cish              | 2.152007053 | 1.105682807 | 2.58E-23    | 2.65E-22    |
| ENSDARG00000076521 | MMP21             | 2.150876695 | 1.10492482  | 0.019247733 | 0.038684717 |
| ENSDARG00000091402 | eif2b1            | 2.150493036 | 1.10466746  | 3.07E-42    | 6.91E-41    |
| ENSDARG00000042727 | EXO5              | 2.14545093  | 1.101280904 | 2.41E-24    | 2.58E-23    |
| ENSDARG00000095879 | wdr46             | 2.144546627 | 1.100672683 | 8.53E-32    | 1.26E-30    |
| ENSDARG00000057529 | itpa              | 2.143967709 | 1.100283177 | 2.64E-25    | 2.94E-24    |
| ENSDARG00000034060 | elac2             | 2.143838049 | 1.100195925 | 1.46E-51    | 4.54E-50    |
| ENSDARG00000016212 | nup214            | 2.14363644  | 1.100060246 | 1.65E-50    | 4.95E-49    |
| ENSDARG00000010770 | sox19a            | 2.143623068 | 1.100051246 | 5.61E-51    | 1.70E-49    |
| ENSDARG00000055113 | pom121            | 2.143017951 | 1.099643935 | 3.93E-56    | 1.42E-54    |
| ENSDARG00000017820 | polr3d            | 2.141641333 | 1.098716888 | 7.05E-32    | 1.04E-30    |
| ENSDARG00000052550 | nkx2.2b           | 2.14150124  | 1.098622513 | 2.50E-16    | 1.74E-15    |
| ENSDARG00000091351 | cnp               | 2.141158185 | 1.098391383 | 1.39E-29    | 1.86E-28    |
| ENSDARG00000074622 |                   | 2.13989531  | 1.097540217 | 3.08E-17    | 2.28E-16    |



|                    |                   |             |             |             |             |
|--------------------|-------------------|-------------|-------------|-------------|-------------|
| ENSDARG00000012485 | aurka             | 2.139759488 | 1.097448645 | 2.19E-55    | 7.75E-54    |
| ENSDARG00000090714 | gaa               | 2.139708399 | 1.097414198 | 3.56E-13    | 2.04E-12    |
| ENSDARG00000093125 | RGPD3             | 2.137808751 | 1.096132795 | 1.50E-38    | 2.91E-37    |
| ENSDARG00000042533 | gstm              | 2.13712138  | 1.09566885  | 3.48E-54    | 1.18E-52    |
| ENSDARG00000008461 | anapc5            | 2.13682982  | 1.095472014 | 3.29E-41    | 7.08E-40    |
| ENSDARG00000086777 | CABZ01055170.1    | 2.136656425 | 1.095354941 | 8.01E-41    | 1.70E-39    |
| ENSDARG00000052617 | raver1            | 2.135752858 | 1.094744713 | 5.17E-55    | 1.80E-53    |
| ENSDARG00000017199 | elp2              | 2.135701984 | 1.094710347 | 2.04E-42    | 4.66E-41    |
| ENSDARG00000023950 | znhit3            | 2.134796162 | 1.094098322 | 2.67E-09    | 1.15E-08    |
| ENSDARG00000093713 | si:dkey-256i11.2  | 2.133311237 | 1.093094461 | 1.83E-05    | 5.60E-05    |
| ENSDARG00000098045 | si:dkey-172f14.2  | 2.132762846 | 1.092723553 | 8.69E-10    | 3.92E-09    |
| ENSDARG00000089858 | COBLL1 (2 of 2)   | 2.131851582 | 1.092107002 | 7.14E-15    | 4.56E-14    |
| ENSDARG00000097211 | si:ch211-248g18.6 | 2.131678886 | 1.091990128 | 3.46E-10    | 1.60E-09    |
| ENSDARG00000076237 | CU302319.2        | 2.130862671 | 1.091437618 | 0.013717491 | 0.028418161 |
| ENSDARG00000012929 | eif2d             | 2.130448497 | 1.091157175 | 1.55E-53    | 5.14E-52    |
| ENSDARG00000015070 | pola2             | 2.130262334 | 1.091031104 | 2.44E-54    | 8.31E-53    |
| ENSDARG00000095705 | CDPF1             | 2.130256117 | 1.091026894 | 1.60E-32    | 2.43E-31    |
| ENSDARG00000051756 | pdhx              | 2.129828581 | 1.09073732  | 7.09E-57    | 2.58E-55    |
| ENSDARG00000060304 | map7d1a           | 2.129529117 | 1.090534456 | 1.50E-51    | 4.65E-50    |
| ENSDARG00000031126 | notum1a           | 2.127842131 | 1.089391118 | 1.51E-40    | 3.16E-39    |
| ENSDARG00000076551 | setd8b            | 2.127758212 | 1.089334219 | 1.33E-51    | 4.12E-50    |
| ENSDARG00000055969 | rfc3              | 2.126108399 | 1.088215154 | 1.78E-52    | 5.70E-51    |
| ENSDARG00000025854 | ddx51             | 2.126029133 | 1.088161366 | 1.35E-42    | 3.09E-41    |
| ENSDARG00000067969 | SPATS2 (1 of 2)   | 2.125489333 | 1.087795019 | 1.31E-40    | 2.75E-39    |
| ENSDARG00000053301 | insm1b            | 2.124054955 | 1.086821093 | 5.71E-52    | 1.80E-50    |
| ENSDARG00000093283 | CABZ01051641.2    | 2.123969855 | 1.08676329  | 0.013196451 | 0.027404674 |
| ENSDARG00000004763 | HLA2 (1 of 4)     | 2.123773719 | 1.08663006  | 7.51E-06    | 2.39E-05    |
| ENSDARG00000058656 | desma             | 2.123706379 | 1.086584315 | 1.42E-16    | 1.01E-15    |
| ENSDARG00000063276 | msh3              | 2.123577401 | 1.086496694 | 1.71E-14    | 1.07E-13    |
| ENSDARG00000041490 | zgc:161979        | 2.12260184  | 1.085833774 | 2.49E-41    | 5.39E-40    |

|                    |                    |             |             |             |             |
|--------------------|--------------------|-------------|-------------|-------------|-------------|
| ENSDARG00000017454 | nup50              | 2.122001844 | 1.08542591  | 2.95E-45    | 7.49E-44    |
| ENSDARG00000080531 | SNORD31            | 2.121456997 | 1.085055435 | 0.001099947 | 0.002697695 |
| ENSDARG00000038957 | flvcr2a            | 2.120742464 | 1.084569435 | 1.23E-05    | 3.83E-05    |
| ENSDARG00000056640 | rpia               | 2.120713376 | 1.084549648 | 8.19E-55    | 2.84E-53    |
| ENSDARG00000056111 | lmod1              | 2.120546279 | 1.084435969 | 3.95E-21    | 3.62E-20    |
| ENSDARG00000070109 | ncapg              | 2.120540536 | 1.084432062 | 5.76E-42    | 1.28E-40    |
| ENSDARG00000043105 | qtrt1              | 2.120434987 | 1.08436025  | 4.72E-31    | 6.74E-30    |
| ENSDARG00000006003 | mycla              | 2.119377717 | 1.083640729 | 6.68E-56    | 2.40E-54    |
| ENSDARG00000090936 | ERICH2             | 2.118302883 | 1.082908886 | 9.62E-09    | 3.99E-08    |
| ENSDARG00000079345 | si:ch211-217k17.10 | 2.115182376 | 1.080782061 | 0.000329418 | 0.000867367 |
| ENSDARG00000016496 | cdk8               | 2.115167807 | 1.080772124 | 5.25E-54    | 1.76E-52    |
| ENSDARG00000094558 | si:dkeyp-53e4.1    | 2.113832947 | 1.079861368 | 0.000383068 | 0.001000378 |
| ENSDARG00000054318 | stk33              | 2.113201795 | 1.079430541 | 0.00019509  | 0.000528569 |
| ENSDARG00000027857 | cep97              | 2.112530585 | 1.078972229 | 5.65E-49    | 1.61E-47    |
| ENSDARG00000089630 | CABZ01087088.1     | 2.111199677 | 1.078063035 | 2.01E-21    | 1.87E-20    |
| ENSDARG00000097714 | si:ch1073-384e4.1  | 2.110880861 | 1.077845155 | 3.72E-06    | 1.22E-05    |
| ENSDARG00000018574 | sf3b4              | 2.109708777 | 1.077043864 | 6.57E-55    | 2.29E-53    |
| ENSDARG00000073788 | noa1               | 2.106383287 | 1.074767979 | 3.34E-26    | 3.90E-25    |
| ENSDARG00000006392 | exosc9             | 2.10458654  | 1.073536834 | 6.46E-40    | 1.32E-38    |
| ENSDARG00000086639 | siva1              | 2.104340423 | 1.073368111 | 1.44E-27    | 1.78E-26    |
| ENSDARG00000083400 | SNORA73            | 2.104310382 | 1.073347515 | 0.010084321 | 0.021382523 |
| ENSDARG00000044402 | nop16              | 2.104301702 | 1.073341564 | 1.15E-41    | 2.52E-40    |
| ENSDARG00000096997 | si:dkey-53i3.1     | 2.102983215 | 1.072437335 | 1.97E-12    | 1.07E-11    |
| ENSDARG00000040252 | atp1a1a.5          | 2.101268292 | 1.071260378 | 2.66E-22    | 2.58E-21    |
| ENSDARG00000004455 | p2rx5              | 2.100982353 | 1.071064044 | 1.48E-31    | 2.16E-30    |
| ENSDARG00000096777 | C12H16orf93        | 2.100885    | 1.070997193 | 0.014465723 | 0.029831222 |
| ENSDARG00000067608 | zswim7             | 2.100049521 | 1.070423348 | 7.16E-06    | 2.28E-05    |
| ENSDARG00000021265 | mybpc2b            | 2.099190969 | 1.069833418 | 2.08E-14    | 1.29E-13    |
| ENSDARG00000075593 | trim71             | 2.098084484 | 1.069072772 | 9.01E-46    | 2.32E-44    |
| ENSDARG00000035634 | rfc5               | 2.097595487 | 1.068736487 | 1.19E-52    | 3.85E-51    |

|                    |                  |             |             |             |             |
|--------------------|------------------|-------------|-------------|-------------|-------------|
| ENSDARG00000037378 | qdprb1           | 2.096106831 | 1.067712248 | 1.02E-32    | 1.57E-31    |
| ENSDARG00000096886 | HEPHL1 (3 of 3)  | 2.095745056 | 1.067463226 | 2.88E-14    | 1.77E-13    |
| ENSDARG00000071005 | ppp1r3ca         | 2.095481741 | 1.067281951 | 4.11E-26    | 4.77E-25    |
| ENSDARG00000033706 | adora2aa         | 2.094853396 | 1.066849284 | 4.94E-08    | 1.93E-07    |
| ENSDARG00000069388 | tmem88b          | 2.093713299 | 1.066063901 | 1.08E-37    | 2.02E-36    |
| ENSDARG00000023160 | snrnp40          | 2.092936254 | 1.065528371 | 6.40E-53    | 2.08E-51    |
| ENSDARG00000091383 | CABZ01072242.1   | 2.09271351  | 1.065374822 | 3.86E-41    | 8.27E-40    |
| ENSDARG00000086393 | dbx1a            | 2.09243717  | 1.065184303 | 3.80E-42    | 8.51E-41    |
| ENSDARG00000009743 | efhc1            | 2.091821241 | 1.064759569 | 1.02E-15    | 6.89E-15    |
| ENSDARG00000042370 | PTAFR            | 2.091357801 | 1.064439907 | 7.06E-05    | 0.000202814 |
| ENSDARG00000080337 | AC024175.4       | 2.090654878 | 1.063954924 | 5.38E-12    | 2.83E-11    |
| ENSDARG00000090070 | CABZ01060490.2   | 2.090108568 | 1.063577883 | 0.016077927 | 0.032860174 |
| ENSDARG00000023028 | cdv3             | 2.089988237 | 1.063494822 | 4.96E-34    | 7.97E-33    |
| ENSDARG00000078396 | wdr46            | 2.089351421 | 1.063055169 | 4.76E-33    | 7.37E-32    |
| ENSDARG00000016543 | rnmtl1a          | 2.088581498 | 1.062523439 | 1.56E-16    | 1.11E-15    |
| ENSDARG00000095698 | si:dkey-228a15.1 | 2.087806653 | 1.061988113 | 7.63E-05    | 0.000218233 |
| ENSDARG00000058891 | nedd9            | 2.08701222  | 1.061439048 | 3.46E-07    | 1.26E-06    |
| ENSDARG00000079748 | ABHD15           | 2.086874454 | 1.061343811 | 0.010846502 | 0.022874018 |
| ENSDARG00000008239 | mocs3            | 2.086856644 | 1.061331499 | 1.89E-17    | 1.41E-16    |
| ENSDARG00000075687 | anapc1           | 2.086740837 | 1.061251436 | 9.18E-54    | 3.06E-52    |
| ENSDARG00000053047 | eif2s2           | 2.086325819 | 1.060964479 | 7.98E-22    | 7.52E-21    |
| ENSDARG00000045695 | myca             | 2.085953053 | 1.060706689 | 7.23E-52    | 2.26E-50    |
| ENSDARG00000061850 | CR847986.1       | 2.085427959 | 1.060343476 | 1.56E-16    | 1.10E-15    |
| ENSDARG00000058488 | adora2ab         | 2.085328203 | 1.060274462 | 7.08E-05    | 0.000203276 |
| ENSDARG00000091350 | CABZ01073112.1   | 2.085001534 | 1.060048445 | 6.24E-37    | 1.13E-35    |
| ENSDARG00000069082 | rnmtl1b          | 2.084848682 | 1.059942677 | 6.44E-22    | 6.11E-21    |
| ENSDARG00000012222 | nup35            | 2.084270809 | 1.059542739 | 2.43E-49    | 7.03E-48    |
| ENSDARG00000090163 | MYO18B (3 of 4)  | 2.083719298 | 1.059160942 | 0.000313973 | 0.000829157 |
| ENSDARG00000070278 | mettl14          | 2.083330713 | 1.058891875 | 7.10E-39    | 1.40E-37    |
| ENSDARG00000044691 | ppp1r3b          | 2.083008412 | 1.058668666 | 2.37E-24    | 2.53E-23    |

|                    |                  |             |             |             |             |
|--------------------|------------------|-------------|-------------|-------------|-------------|
| ENSDARG00000038754 | plk3             | 2.082970776 | 1.058642599 | 4.02E-51    | 1.23E-49    |
| ENSDARG00000087107 | CFAP221          | 2.082928196 | 1.058613106 | 7.93E-05    | 0.000226398 |
| ENSDARG00000016815 | casc1            | 2.082495145 | 1.058313132 | 1.39E-06    | 4.75E-06    |
| ENSDARG00000089307 | pmaip1           | 2.082415056 | 1.058257648 | 8.50E-06    | 2.69E-05    |
| ENSDARG00000092938 | BX663505.2       | 2.081499816 | 1.057623431 | 0.002170758 | 0.005105775 |
| ENSDARG00000089998 | KIAA2012         | 2.081256697 | 1.057454914 | 2.16E-05    | 6.55E-05    |
| ENSDARG00000089988 | CCNA2            | 2.081078087 | 1.057331099 | 1.16E-48    | 3.25E-47    |
| ENSDARG00000010732 | xrcc4            | 2.080743217 | 1.057098934 | 1.14E-24    | 1.24E-23    |
| ENSDARG00000016122 | ptrhd1           | 2.080333101 | 1.05681455  | 3.18E-26    | 3.72E-25    |
| ENSDARG00000031098 | timm50           | 2.08007214  | 1.056633564 | 5.16E-49    | 1.47E-47    |
| ENSDARG00000056438 | her9             | 2.079927847 | 1.056533482 | 1.85E-49    | 5.38E-48    |
| ENSDARG00000090568 | MRPL52           | 2.079910295 | 1.056521307 | 2.44E-28    | 3.10E-27    |
| ENSDARG00000077703 | ehmt2            | 2.079580882 | 1.056292797 | 2.63E-53    | 8.67E-52    |
| ENSDARG00000071164 | alkbh1           | 2.079366631 | 1.056144155 | 7.89E-20    | 6.75E-19    |
| ENSDARG00000056059 | rangap1b         | 2.079159937 | 1.05600074  | 4.55E-53    | 1.49E-51    |
| ENSDARG00000089697 | nfe2l2b          | 2.078816828 | 1.055762643 | 3.36E-13    | 1.93E-12    |
| ENSDARG00000070228 | cdk6             | 2.078603785 | 1.055614784 | 3.38E-53    | 1.11E-51    |
| ENSDARG00000088805 | nes              | 2.077744258 | 1.055018089 | 5.95E-52    | 1.87E-50    |
| ENSDARG00000091669 | si:dkey-17e16.17 | 2.077706989 | 1.054992211 | 8.80E-44    | 2.13E-42    |
| ENSDARG00000097705 | dnah9            | 2.077139593 | 1.054598175 | 0.009430453 | 0.020092042 |
| ENSDARG00000010130 | smpd13b          | 2.077137706 | 1.054596865 | 1.29E-33    | 2.05E-32    |
| ENSDARG00000057062 | wu:fc13c02       | 2.077032897 | 1.054524066 | 4.92E-51    | 1.50E-49    |
| ENSDARG00000040727 | tfb1m            | 2.076848962 | 1.054396301 | 1.30E-13    | 7.62E-13    |
| ENSDARG00000006598 | sgk2b            | 2.076840213 | 1.054390223 | 2.09E-42    | 4.76E-41    |
| ENSDARG00000079457 | C12H17orf70      | 2.07627181  | 1.053995323 | 9.01E-21    | 8.12E-20    |
| ENSDARG00000089016 | mapkapk3         | 2.075976508 | 1.053790118 | 6.38E-36    | 1.11E-34    |
| ENSDARG00000068567 | shha             | 2.074686017 | 1.052893015 | 4.78E-52    | 1.51E-50    |
| ENSDARG00000034650 | fabp7b           | 2.074394966 | 1.05269061  | 2.90E-24    | 3.09E-23    |
| ENSDARG00000003519 | aprt             | 2.074244661 | 1.052586073 | 2.05E-33    | 3.22E-32    |
| ENSDARG00000017407 | ttl12            | 2.072996128 | 1.051717422 | 4.93E-19    | 4.03E-18    |

|                    |                  |             |             |             |             |
|--------------------|------------------|-------------|-------------|-------------|-------------|
| ENSDARG00000002710 | ncl              | 2.072526154 | 1.051390308 | 2.50E-08    | 1.00E-07    |
| ENSDARG00000078800 | slc26a10         | 2.072466729 | 1.051348941 | 1.03E-08    | 4.26E-08    |
| ENSDARG00000040350 | rpp38            | 2.07201978  | 1.051037775 | 6.43E-07    | 2.28E-06    |
| ENSDARG00000057321 | tut1             | 2.071613423 | 1.050754811 | 3.81E-37    | 6.94E-36    |
| ENSDARG00000036227 | npvf             | 2.071416719 | 1.050617818 | 4.99E-08    | 1.95E-07    |
| ENSDARG00000037640 | aurkb            | 2.070997386 | 1.050325732 | 1.22E-52    | 3.94E-51    |
| ENSDARG00000021120 | ndc1             | 2.070951505 | 1.050293771 | 1.31E-52    | 4.23E-51    |
| ENSDARG00000037229 | denr             | 2.070612472 | 1.050057569 | 1.77E-51    | 5.47E-50    |
| ENSDARG00000097485 | CFAP99           | 2.069865761 | 1.049537206 | 2.79E-17    | 2.07E-16    |
| ENSDARG00000062806 | ttlI9            | 2.069849604 | 1.049525945 | 0.000768975 | 0.001927218 |
| ENSDARG00000037910 | FILIP1L (1 of 2) | 2.069015362 | 1.048944357 | 6.14E-51    | 1.86E-49    |
| ENSDARG00000077800 | fancm            | 2.068623667 | 1.048671208 | 5.94E-18    | 4.55E-17    |
| ENSDARG00000068916 | PPP1R35          | 2.06859604  | 1.04865194  | 2.35E-10    | 1.11E-09    |
| ENSDARG00000012274 | eif4e1c          | 2.067970945 | 1.048215916 | 2.44E-48    | 6.82E-47    |
| ENSDARG00000029764 | mef2ca           | 2.067382693 | 1.04780547  | 3.00E-36    | 5.30E-35    |
| ENSDARG00000017425 | si:ch211-95g8.1  | 2.067187557 | 1.047669291 | 2.80E-20    | 2.45E-19    |
| ENSDARG00000086657 | si:dkey-29n10.3  | 2.065863131 | 1.046744675 | 0.013175438 | 0.02736904  |
| ENSDARG00000087502 |                  | 2.065701843 | 1.046632035 | 3.03E-09    | 1.31E-08    |
| ENSDARG00000088764 | lyplal1          | 2.06553809  | 1.046517665 | 2.89E-22    | 2.80E-21    |
| ENSDARG00000094518 | si:ch211-125e6.8 | 2.064914641 | 1.046082145 | 9.34E-27    | 1.12E-25    |
| ENSDARG00000055443 | zcchc7           | 2.063937402 | 1.045399215 | 7.60E-41    | 1.61E-39    |
| ENSDARG00000030108 | sec22ba          | 2.063467405 | 1.045070649 | 2.48E-44    | 6.13E-43    |
| ENSDARG00000093792 | BX469910.2       | 2.063459492 | 1.045065117 | 5.57E-05    | 0.000161707 |
| ENSDARG00000076996 | IPO13 (2 of 2)   | 2.063002093 | 1.044745285 | 7.08E-26    | 8.13E-25    |
| ENSDARG00000061231 | tinagl1          | 2.062061767 | 1.044087548 | 2.29E-52    | 7.30E-51    |
| ENSDARG00000015352 | lsg1             | 2.060809474 | 1.043211131 | 9.11E-52    | 2.84E-50    |
| ENSDARG00000086998 | zgc:64002        | 2.060668721 | 1.043112592 | 0.013191843 | 0.02739911  |
| ENSDARG00000086305 |                  | 2.0606511   | 1.043100255 | 8.81E-07    | 3.08E-06    |
| ENSDARG00000071208 | wnt4a            | 2.060472593 | 1.042975274 | 1.38E-27    | 1.71E-26    |
| ENSDARG00000095863 | zgc:161979       | 2.060119494 | 1.042728021 | 2.08E-17    | 1.55E-16    |

|                    |                    |             |             |             |             |
|--------------------|--------------------|-------------|-------------|-------------|-------------|
| ENSDARG00000090806 | GEMIN6             | 2.060055542 | 1.042683235 | 4.17E-17    | 3.06E-16    |
| ENSDARG00000078606 | C20H1orf131        | 2.059440444 | 1.042252406 | 4.50E-17    | 3.30E-16    |
| ENSDARG00000054155 | pcna               | 2.05936783  | 1.042201537 | 9.92E-17    | 7.13E-16    |
| ENSDARG00000069723 | zbbx               | 2.058946645 | 1.041906445 | 0.003369525 | 0.007713368 |
| ENSDARG00000058606 | SIK1               | 2.057864366 | 1.041147897 | 9.46E-42    | 2.09E-40    |
| ENSDARG00000076411 | ptrfa              | 2.057533781 | 1.040916117 | 5.54E-36    | 9.68E-35    |
| ENSDARG00000015611 | rasl11b            | 2.056984903 | 1.040531206 | 1.60E-30    | 2.23E-29    |
| ENSDARG00000068993 | TNFRSF14 (6 of 12) | 2.056621553 | 1.040276342 | 2.68E-31    | 3.87E-30    |
| ENSDARG00000030703 | otx1a              | 2.056452912 | 1.040158038 | 2.77E-30    | 3.83E-29    |
| ENSDARG00000034624 | nuf2               | 2.055704542 | 1.039632927 | 2.29E-48    | 6.40E-47    |
| ENSDARG00000088924 | CENPU (2 of 2)     | 2.054957991 | 1.039108902 | 1.30E-19    | 1.10E-18    |
| ENSDARG00000012674 | rpud4              | 2.054808485 | 1.039003936 | 1.05E-23    | 1.09E-22    |
| ENSDARG00000008454 | cpeb1b             | 2.054307163 | 1.038651912 | 0.000807335 | 0.002016776 |
| ENSDARG00000076010 | twist1b            | 2.05382801  | 1.038315374 | 8.89E-13    | 4.94E-12    |
| ENSDARG00000008105 | mettl2a            | 2.053043806 | 1.037764411 | 1.37E-43    | 3.29E-42    |
| ENSDARG00000087710 | SNORA3             | 2.052131496 | 1.037123179 | 0.002058514 | 0.004863104 |
| ENSDARG00000094896 | RBM33              | 2.051824907 | 1.036907624 | 0.003913748 | 0.008874099 |
| ENSDARG00000011326 | ankrd45            | 2.051072653 | 1.036378596 | 0.017635778 | 0.035738204 |
| ENSDARG00000020114 | slc20a1a           | 2.04983858  | 1.035510305 | 1.36E-37    | 2.52E-36    |
| ENSDARG00000022013 | lama2              | 2.049769517 | 1.035461697 | 9.45E-43    | 2.19E-41    |
| ENSDARG00000040668 | lrtomt             | 2.049633652 | 1.035366068 | 0.001246967 | 0.00303416  |
| ENSDARG00000075944 | nms                | 2.048435866 | 1.034522725 | 0.01762807  | 0.035727681 |
| ENSDARG00000089591 | WDR77              | 2.047510233 | 1.033870662 | 1.12E-42    | 2.58E-41    |
| ENSDARG00000044329 | opa1               | 2.047353034 | 1.033759894 | 1.35E-06    | 4.64E-06    |
| ENSDARG00000046045 | hoxc6b             | 2.046785102 | 1.033359638 | 1.85E-16    | 1.31E-15    |
| ENSDARG00000078280 | nkx3-1             | 2.045856582 | 1.032705013 | 0.001549548 | 0.00372513  |
| ENSDARG00000040725 | zgc:114130         | 2.045736655 | 1.032620441 | 1.02E-49    | 2.98E-48    |
| ENSDARG00000012234 | psme3              | 2.045401303 | 1.032383924 | 7.25E-51    | 2.20E-49    |
| ENSDARG00000010246 | prmt1              | 2.044824591 | 1.031977091 | 1.34E-24    | 1.45E-23    |
| ENSDARG00000015930 | rwdd1              | 2.044698059 | 1.031887816 | 1.32E-50    | 3.97E-49    |

|                    |                   |             |             |             |             |
|--------------------|-------------------|-------------|-------------|-------------|-------------|
| ENSDARG00000018847 | UTP20             | 2.044459918 | 1.031719779 | 2.84E-48    | 7.90E-47    |
| ENSDARG00000068168 | hes2.2            | 2.044097029 | 1.03146368  | 3.05E-32    | 4.57E-31    |
| ENSDARG00000007885 | fanc1             | 2.043972476 | 1.031375769 | 2.31E-06    | 7.75E-06    |
| ENSDARG00000029252 | ssb               | 2.043919162 | 1.031338138 | 5.98E-41    | 1.27E-39    |
| ENSDARG00000084628 | SNORA27           | 2.042778134 | 1.030532522 | 0.010335824 | 0.021861964 |
| ENSDARG00000022303 | hig1              | 2.041960665 | 1.029955075 | 2.05E-50    | 6.13E-49    |
| ENSDARG00000087954 | rac1b             | 2.040842141 | 1.029164594 | 0.000269996 | 0.00071796  |
| ENSDARG00000077900 | si:ch211-141o9.10 | 2.04038612  | 1.028842192 | 2.45E-07    | 9.03E-07    |
| ENSDARG00000075917 | CFAP74            | 2.04009088  | 1.028633422 | 2.50E-12    | 1.35E-11    |
| ENSDARG00000035750 | ccnd1             | 2.039822439 | 1.028443575 | 1.10E-16    | 7.85E-16    |
| ENSDARG00000087358 | si:dkeyp-109b10.4 | 2.03958079  | 1.028272655 | 9.31E-12    | 4.84E-11    |
| ENSDARG00000041904 | ankzf1            | 2.037465196 | 1.026775416 | 1.56E-43    | 3.73E-42    |
| ENSDARG00000091146 |                   | 2.037430323 | 1.026750722 | 0.0080731   | 0.01739184  |
| ENSDARG00000019503 | zgc:103759        | 2.036269586 | 1.025928576 | 0.004107711 | 0.009277614 |
| ENSDARG00000079672 | EFTUD1            | 2.035022776 | 1.025044941 | 1.24E-19    | 1.05E-18    |
| ENSDARG00000029445 | EIF1B             | 2.034414806 | 1.024613867 | 2.57E-38    | 4.91E-37    |
| ENSDARG00000088014 | si:ch211-223a21.4 | 2.034379938 | 1.02458914  | 0.008632985 | 0.018502603 |
| ENSDARG00000060256 | alkbh8            | 2.034112099 | 1.024399187 | 4.38E-20    | 3.80E-19    |
| ENSDARG00000030949 | srprb             | 2.033651045 | 1.024072148 | 4.50E-49    | 1.29E-47    |
| ENSDARG00000061548 | si:ch211-145o7.3  | 2.033461915 | 1.023937971 | 1.33E-12    | 7.30E-12    |
| ENSDARG00000032277 | rars2             | 2.033087262 | 1.023672138 | 4.72E-19    | 3.86E-18    |
| ENSDARG00000019156 | haus5             | 2.031945602 | 1.02286178  | 2.76E-33    | 4.32E-32    |
| ENSDARG00000059982 | poc5              | 2.031167148 | 1.022308966 | 2.89E-20    | 2.53E-19    |
| ENSDARG00000070868 | CFAP126           | 2.031107792 | 1.022266806 | 1.56E-09    | 6.89E-09    |
| ENSDARG00000089363 | CABZ01002718.1    | 2.030697625 | 1.021975435 | 0.020492014 | 0.04095664  |
| ENSDARG00000014976 | lims2             | 2.030443557 | 1.021794923 | 2.95E-49    | 8.51E-48    |
| ENSDARG00000016080 | nob1              | 2.029842688 | 1.021367924 | 6.74E-50    | 1.98E-48    |
| ENSDARG00000053021 | grsf1             | 2.029755121 | 1.021305684 | 2.27E-46    | 5.94E-45    |
| ENSDARG00000039863 | lifrb             | 2.029093469 | 1.020835323 | 4.77E-15    | 3.08E-14    |
| ENSDARG00000055252 | SNAP23 (2 of 2)   | 2.028594063 | 1.0204802   | 3.33E-14    | 2.03E-13    |

|                     |                  |             |             |             |             |
|---------------------|------------------|-------------|-------------|-------------|-------------|
| ENSDARG00000012113  | C19H1orf109      | 2.028374224 | 1.020323846 | 4.31E-12    | 2.29E-11    |
| ENSDARG00000001859  | dbx1b            | 2.027945737 | 1.02001905  | 5.20E-32    | 7.71E-31    |
| ENSDARG00000010078  | nup133           | 2.027735253 | 1.019869302 | 1.79E-46    | 4.70E-45    |
| ENSDARG000000089083 | itga7            | 2.027455019 | 1.019669907 | 3.32E-40    | 6.87E-39    |
| ENSDARG000000020442 | snx5             | 2.027110314 | 1.019424602 | 1.93E-45    | 4.93E-44    |
| ENSDARG000000057010 | si:dkey-154b15.1 | 2.026831071 | 1.019225851 | 5.37E-06    | 1.73E-05    |
| ENSDARG000000052134 | eri2             | 2.025356904 | 1.018176159 | 3.08E-16    | 2.13E-15    |
| ENSDARG000000029866 | slc6a14          | 2.02475574  | 1.017747876 | 0.000379319 | 0.000991226 |
| ENSDARG000000087320 | CABZ01017734.1   | 2.02361406  | 1.016934168 | 1.83E-08    | 7.40E-08    |
| ENSDARG00000015222  | cbll1            | 2.02183147  | 1.015662746 | 3.23E-34    | 5.23E-33    |
| ENSDARG00000018264  | trim101          | 2.020786546 | 1.014916939 | 1.33E-47    | 3.64E-46    |
| ENSDARG000000079066 | THBS1 (3 of 3)   | 2.019098182 | 1.013711066 | 7.59E-39    | 1.49E-37    |
| ENSDARG000000033172 | nr2f5            | 2.018703549 | 1.013429063 | 5.25E-43    | 1.23E-41    |
| ENSDARG000000094191 | nup37            | 2.01842489  | 1.013229902 | 1.39E-32    | 2.11E-31    |
| ENSDARG000000042530 | nup205           | 2.016929015 | 1.01216031  | 1.42E-35    | 2.45E-34    |
| ENSDARG000000008247 | vezf1a           | 2.015719765 | 1.011295082 | 2.34E-32    | 3.53E-31    |
| ENSDARG000000074974 | CEP192           | 2.015656566 | 1.011249849 | 1.35E-22    | 1.33E-21    |
| ENSDARG000000006174 | lrrc23           | 2.015122782 | 1.010867745 | 2.31E-05    | 6.97E-05    |
| ENSDARG000000086976 | USP30 (2 of 3)   | 2.015060957 | 1.010823482 | 0.016659695 | 0.033941769 |
| ENSDARG000000091728 | zgc:173587       | 2.014703975 | 1.010567876 | 1.17E-05    | 3.65E-05    |
| ENSDARG000000068855 | CCDC176 (2 of 2) | 2.013664421 | 1.009823277 | 3.47E-05    | 0.000103158 |
| ENSDARG000000046141 | C8H12orf43       | 2.013486229 | 1.009695605 | 3.98E-14    | 2.42E-13    |
| ENSDARG000000087285 | TMEM182 (2 of 2) | 2.013211155 | 1.009498496 | 2.50E-05    | 7.51E-05    |
| ENSDARG000000058467 | prpf40a          | 2.013183629 | 1.009478771 | 3.98E-34    | 6.42E-33    |
| ENSDARG000000037309 | pet112           | 2.013028015 | 1.00936725  | 1.78E-28    | 2.27E-27    |
| ENSDARG000000077728 | supv3l1          | 2.012987077 | 1.00933791  | 6.54E-42    | 1.45E-40    |
| ENSDARG000000009461 | hoxa9a           | 2.012699501 | 1.009131792 | 2.41E-18    | 1.89E-17    |
| ENSDARG000000038399 | polr3h           | 2.012206559 | 1.00877841  | 2.31E-41    | 5.00E-40    |
| ENSDARG000000044479 | eif2a            | 2.012032827 | 1.008653843 | 1.78E-48    | 5.00E-47    |
| ENSDARG000000069775 | FBXO40 (1 of 2)  | 2.011954212 | 1.008597472 | 1.53E-26    | 1.81E-25    |



|                    |                    |             |              |             |             |
|--------------------|--------------------|-------------|--------------|-------------|-------------|
| ENSDARG00000093898 | NLRP6 (116 of 145) | 2.011149492 | 1.008020324  | 0.018530199 | 0.037364172 |
| ENSDARG00000077698 | rsad1              | 2.009028777 | 1.006498229  | 2.98E-06    | 9.85E-06    |
| ENSDARG00000042345 | si:dkeyp-55f12.3   | 2.008636338 | 1.006216389  | 3.01E-20    | 2.63E-19    |
| ENSDARG00000016093 | qtrtd1             | 2.008098311 | 1.005829902  | 9.31E-20    | 7.92E-19    |
| ENSDARG00000089967 | si:ch211-59o9.10   | 2.008025656 | 1.005777703  | 5.89E-40    | 1.21E-38    |
| ENSDARG00000076913 | eme1               | 2.007890711 | 1.005680746  | 2.00E-30    | 2.78E-29    |
| ENSDARG00000060798 | mrpl22             | 2.007860769 | 1.005659232  | 7.19E-39    | 1.42E-37    |
| ENSDARG00000074007 | wdr4               | 2.007814277 | 1.005625826  | 3.04E-20    | 2.66E-19    |
| ENSDARG00000051984 | zgc:113389         | 2.007548127 | 1.005434574  | 1.33E-10    | 6.38E-10    |
| ENSDARG00000018797 | crygmxl1           | 2.007261272 | 1.005228415  | 2.10E-11    | 1.06E-10    |
| ENSDARG00000096049 | si:ch211-120c15.1  | 2.006506734 | 1.004685998  | 0.00385712  | 0.008754082 |
| ENSDARG00000039134 | MTR                | 2.006035904 | 1.004347428  | 9.38E-48    | 2.57E-46    |
| ENSDARG00000035665 | CT027569.1         | 2.005367036 | 1.003866313  | 0.006593086 | 0.014425486 |
| ENSDARG00000018891 | rnaseh2a           | 2.005295264 | 1.003814678  | 4.30E-44    | 1.06E-42    |
| ENSDARG00000094489 | si:dkey-58f10.6    | 2.005173177 | 1.003726841  | 0.012585113 | 0.02626374  |
| ENSDARG00000046098 | ebp                | 2.005156185 | 1.003714615  | 1.41E-13    | 8.28E-13    |
| ENSDARG00000093678 | si:dkey-102m7.3    | 2.004856069 | 1.003498668  | 5.46E-22    | 5.20E-21    |
| ENSDARG00000008490 | ltv1               | 2.004798295 | 1.003457092  | 1.65E-48    | 4.64E-47    |
| ENSDARG00000060394 |                    | 2.003444449 | 1.002482508  | 7.93E-28    | 9.89E-27    |
| ENSDARG00000069762 | ccdc11             | 2.003419128 | 1.002464274  | 1.52E-08    | 6.19E-08    |
| ENSDARG00000091754 | CHCHD5             | 2.002851686 | 1.002055591  | 8.53E-10    | 3.85E-09    |
| ENSDARG00000007065 | mrps18b            | 2.002622507 | 1.0018905    | 8.41E-44    | 2.04E-42    |
| ENSDARG00000045219 | dkk1b              | 2.002399937 | 1.00173015   | 6.14E-21    | 5.56E-20    |
| ENSDARG00000026281 | lyrm1              | 2.001132543 | 1.000816726  | 2.46E-08    | 9.87E-08    |
| ENSDARG00000078249 | unc13d             | 2.001062749 | 1.000766408  | 4.69E-05    | 0.000137324 |
| ENSDARG00000011683 | prtfdc1            | 2.000864034 | 1.000623134  | 5.74E-39    | 1.14E-37    |
| ENSDARG00000076221 | zgc:198419         | 2.000745738 | 1.000537836  | 7.36E-36    | 1.28E-34    |
| ENSDARG00000076904 | loxl5b             | 2.000507166 | 1.000365797  | 2.12E-08    | 8.54E-08    |
| ENSDARG00000061196 | emilin2a           | 2.00025622  | 1.000184812  | 4.19E-13    | 2.39E-12    |
| ENSDARG00000076068 | crtc1a             | 0.499917927 | -1.000236833 | 1.64E-12    | 8.97E-12    |

|                     |                    |             |              |             |             |
|---------------------|--------------------|-------------|--------------|-------------|-------------|
| ENSDARG00000004648  | kctd16a            | 0.499902569 | -1.000281154 | 3.44E-20    | 3.00E-19    |
| ENSDARG000000090614 | BX005294.4         | 0.499881784 | -1.00034114  | 1.53E-05    | 4.71E-05    |
| ENSDARG000000077231 | vwf                | 0.499881399 | -1.000342249 | 5.38E-06    | 1.73E-05    |
| ENSDARG000000095421 | si:dkey-106l3.6    | 0.499841663 | -1.000456935 | 2.83E-17    | 2.09E-16    |
| ENSDARG000000058154 | znf385c            | 0.499730795 | -1.000776971 | 1.84E-43    | 4.38E-42    |
| ENSDARG00000005786  | ppm1f              | 0.499669216 | -1.000954758 | 4.59E-06    | 1.49E-05    |
| ENSDARG000000085803 | 5S_rRNA            | 0.499624614 | -1.001083543 | 0.003481381 | 0.007954043 |
| ENSDARG000000053110 | pkib               | 0.49962151  | -1.001092506 | 1.17E-19    | 9.93E-19    |
| ENSDARG000000052769 | glrbb              | 0.499614331 | -1.001113235 | 2.16E-42    | 4.90E-41    |
| ENSDARG000000040332 | crfb2              | 0.499588692 | -1.001187271 | 9.07E-10    | 4.08E-09    |
| ENSDARG000000079024 | rps6kl1            | 0.499470393 | -1.001528932 | 7.60E-23    | 7.59E-22    |
| ENSDARG000000037794 | nptx2a             | 0.499458331 | -1.001563773 | 0.004314191 | 0.009714623 |
| ENSDARG000000080018 | kif16bb            | 0.499377843 | -1.001796284 | 3.33E-06    | 1.10E-05    |
| ENSDARG000000068580 | glis1a             | 0.499293275 | -1.002040621 | 0.000186879 | 0.000507531 |
| ENSDARG000000055585 | c1galt1a           | 0.499259953 | -1.002136907 | 2.78E-14    | 1.71E-13    |
| ENSDARG000000053663 | hmp19              | 0.499088671 | -1.002631938 | 2.65E-39    | 5.32E-38    |
| ENSDARG000000041797 | cx28.9             | 0.499034036 | -1.002789878 | 7.75E-06    | 2.46E-05    |
| ENSDARG000000042565 | MAP3K12            | 0.499029677 | -1.002802482 | 4.15E-23    | 4.20E-22    |
| ENSDARG000000097299 | flrt2              | 0.498940699 | -1.003059738 | 3.27E-10    | 1.52E-09    |
| ENSDARG000000024708 | SLC25A41 (2 of 2)  | 0.498849578 | -1.00332324  | 2.14E-06    | 7.18E-06    |
| ENSDARG000000074488 | crfb13             | 0.498833052 | -1.003371036 | 4.12E-15    | 2.68E-14    |
| ENSDARG000000075823 | ZNF608             | 0.498788132 | -1.003500955 | 1.18E-38    | 2.30E-37    |
| ENSDARG000000074546 | si:ch211-213a13.11 | 0.498458743 | -1.004453996 | 0.001178355 | 0.002878567 |
| ENSDARG000000031598 | calb1              | 0.49841729  | -1.004573978 | 3.44E-18    | 2.67E-17    |
| ENSDARG000000086101 | CABZ01071530.1     | 0.497891244 | -1.006097452 | 0.012644707 | 0.026372609 |
| ENSDARG000000076501 | asxl2              | 0.49781955  | -1.006305207 | 2.05E-25    | 2.29E-24    |
| ENSDARG000000090951 | C19H1orf216        | 0.497730312 | -1.006563845 | 1.09E-10    | 5.27E-10    |
| ENSDARG000000071648 | zgc:113298         | 0.497725756 | -1.006577049 | 1.19E-06    | 4.11E-06    |
| ENSDARG000000063357 | GPR45              | 0.497473274 | -1.007309073 | 0.000208598 | 0.00056275  |
| ENSDARG000000028053 | bmp1b              | 0.497468322 | -1.007323435 | 6.88E-12    | 3.60E-11    |

|                    |                    |             |              |             |             |
|--------------------|--------------------|-------------|--------------|-------------|-------------|
| ENSDARG00000040547 | b3gat1a            | 0.497436241 | -1.007416474 | 1.14E-13    | 6.71E-13    |
| ENSDARG00000045033 | bnip3              | 0.497353366 | -1.007656853 | 2.93E-41    | 6.32E-40    |
| ENSDARG00000040151 | esrrb              | 0.497337724 | -1.007702227 | 3.94E-14    | 2.40E-13    |
| ENSDARG00000094377 | samd10b            | 0.497219416 | -1.00804546  | 5.64E-08    | 2.18E-07    |
| ENSDARG00000096713 | si:ch211-170d12.2  | 0.497082412 | -1.008443037 | 2.53E-06    | 8.43E-06    |
| ENSDARG00000035994 | rims2b             | 0.496808562 | -1.009238057 | 4.95E-30    | 6.77E-29    |
| ENSDARG00000063704 | gpr1               | 0.496760065 | -1.009378896 | 9.91E-16    | 6.68E-15    |
| ENSDARG00000055999 | BRD8 (2 of 2)      | 0.496377056 | -1.010491663 | 1.82E-12    | 9.89E-12    |
| ENSDARG00000067760 |                    | 0.496375714 | -1.010495564 | 9.70E-30    | 1.31E-28    |
| ENSDARG00000062562 | egln2              | 0.496354927 | -1.01055598  | 3.26E-29    | 4.31E-28    |
| ENSDARG00000095301 | si:dkey-253a1.2    | 0.496338237 | -1.010604492 | 0.007877288 | 0.016998358 |
| ENSDARG00000062865 | MRAS               | 0.496261117 | -1.010828674 | 1.78E-19    | 1.49E-18    |
| ENSDARG00000007578 | lppr2a             | 0.495653892 | -1.012595035 | 2.57E-08    | 1.03E-07    |
| ENSDARG00000091317 | hunk               | 0.495489692 | -1.013073051 | 1.95E-36    | 3.47E-35    |
| ENSDARG00000088825 | CIT (1 of 2)       | 0.495385849 | -1.013375437 | 1.06E-05    | 3.31E-05    |
| ENSDARG00000041145 | paqr5a             | 0.495346227 | -1.013490831 | 4.45E-05    | 0.000130654 |
| ENSDARG00000078284 | phkb               | 0.495265314 | -1.013726509 | 1.89E-47    | 5.13E-46    |
| ENSDARG00000058039 | bhlhe22            | 0.49513769  | -1.014098324 | 5.90E-49    | 1.68E-47    |
| ENSDARG00000079908 | tmem151a           | 0.495134027 | -1.014108997 | 1.23E-18    | 9.83E-18    |
| ENSDARG00000020798 | necap1             | 0.495083985 | -1.014254812 | 1.23E-43    | 2.96E-42    |
| ENSDARG00000028541 | si:ch211-121a2.4   | 0.494631468 | -1.01557407  | 7.99E-05    | 0.000228209 |
| ENSDARG00000087121 | PCDHGC5 (10 of 31) | 0.494606682 | -1.015646364 | 6.68E-05    | 0.000192308 |
| ENSDARG00000078238 | NACC1              | 0.494579921 | -1.015724424 | 0.005952651 | 0.013131419 |
| ENSDARG00000015891 | ptprea             | 0.49448017  | -1.016015428 | 1.37E-32    | 2.09E-31    |
| ENSDARG00000095665 | si:ch211-191a16.2  | 0.494457792 | -1.016080719 | 5.24E-10    | 2.40E-09    |
| ENSDARG00000076591 | snap91             | 0.494407829 | -1.016226505 | 3.24E-49    | 9.34E-48    |
| ENSDARG00000086342 | zgc:101566         | 0.494369468 | -1.01633845  | 2.37E-43    | 5.62E-42    |
| ENSDARG00000086290 | znf804b            | 0.494265413 | -1.01664214  | 5.46E-14    | 3.29E-13    |
| ENSDARG00000031343 | rab6bb             | 0.494099891 | -1.017125357 | 3.29E-49    | 9.47E-48    |
| ENSDARG00000023082 | krt1-19d           | 0.494000152 | -1.01741661  | 4.56E-42    | 1.02E-40    |

|                    |                   |             |              |             |             |
|--------------------|-------------------|-------------|--------------|-------------|-------------|
| ENSDARG00000071657 | si:dkey-19a16.4   | 0.493967476 | -1.017512041 | 0.006589041 | 0.014418755 |
| ENSDARG00000045265 | si:ch211-138k19.2 | 0.493928471 | -1.017625964 | 3.43E-07    | 1.25E-06    |
| ENSDARG00000059699 | DNAJC16 (1 of 2)  | 0.493917879 | -1.017656901 | 1.27E-10    | 6.10E-10    |
| ENSDARG00000097528 | si:dkey-7j14.5    | 0.493906975 | -1.017688751 | 2.35E-39    | 4.72E-38    |
| ENSDARG00000089061 | CR853287.1        | 0.493858677 | -1.017829837 | 0.008712726 | 0.018663653 |
| ENSDARG00000094000 | si:dkey-153k10.6  | 0.493828599 | -1.017917706 | 3.97E-07    | 1.44E-06    |
| ENSDARG00000061532 | C25H15orf27       | 0.493722878 | -1.018226597 | 3.53E-23    | 3.59E-22    |
| ENSDARG00000044815 | SERINC4           | 0.493711811 | -1.018258935 | 6.96E-09    | 2.92E-08    |
| ENSDARG00000052447 | cryabb            | 0.493678837 | -1.018355293 | 0.01754161  | 0.035575286 |
| ENSDARG00000004415 | tcf7l2            | 0.493673962 | -1.018369541 | 1.31E-41    | 2.87E-40    |
| ENSDARG00000035649 | ext1c             | 0.493642468 | -1.018461581 | 2.69E-30    | 3.72E-29    |
| ENSDARG00000002600 | pcsk1             | 0.493479341 | -1.018938406 | 1.83E-17    | 1.37E-16    |
| ENSDARG00000086575 | CU929113.1        | 0.493281902 | -1.019515738 | 0.001481962 | 0.003570506 |
| ENSDARG00000015849 | zgc:56628         | 0.493259644 | -1.019580837 | 5.85E-05    | 0.000169493 |
| ENSDARG00000005943 | htra4             | 0.493195001 | -1.019769918 | 6.67E-07    | 2.36E-06    |
| ENSDARG00000028521 | c1ql3b            | 0.493009692 | -1.020312086 | 1.45E-09    | 6.42E-09    |
| ENSDARG00000003989 | crhr1             | 0.492993609 | -1.02035915  | 1.86E-11    | 9.45E-11    |
| ENSDARG00000059534 | JPH3 (2 of 2)     | 0.492913398 | -1.0205939   | 5.64E-44    | 1.38E-42    |
| ENSDARG00000088505 | fam217b           | 0.492876181 | -1.020702833 | 3.46E-35    | 5.85E-34    |
| ENSDARG00000061473 | tbkbp1            | 0.492753401 | -1.021062267 | 1.59E-18    | 1.26E-17    |
| ENSDARG00000075956 | FAXC (1 of 2)     | 0.492735187 | -1.021115594 | 6.13E-14    | 3.68E-13    |
| ENSDARG00000045886 | slc38a2           | 0.492486023 | -1.021845314 | 1.74E-41    | 3.80E-40    |
| ENSDARG00000042861 | ltk               | 0.492414366 | -1.022055243 | 3.71E-28    | 4.68E-27    |
| ENSDARG00000095833 | alk               | 0.492339593 | -1.022274332 | 6.70E-15    | 4.29E-14    |
| ENSDARG00000060124 | timmm17b          | 0.492225591 | -1.022608428 | 2.24E-05    | 6.77E-05    |
| ENSDARG00000058162 | pcyt1ba           | 0.492081715 | -1.023030185 | 1.33E-15    | 8.87E-15    |
| ENSDARG00000060532 | adam22            | 0.491991372 | -1.02329508  | 3.71E-49    | 1.07E-47    |
| ENSDARG00000002241 | KCNA2 (1 of 2)    | 0.491807093 | -1.023835554 | 0.00483112  | 0.010799041 |
| ENSDARG00000002607 |                   | 0.491786229 | -1.023896757 | 5.21E-37    | 9.46E-36    |
| ENSDARG00000032737 | gria3a            | 0.491353689 | -1.025166207 | 1.88E-41    | 4.09E-40    |

|                    |                   |             |              |             |             |
|--------------------|-------------------|-------------|--------------|-------------|-------------|
| ENSDARG00000079446 |                   | 0.491193192 | -1.02563753  | 6.32E-13    | 3.55E-12    |
| ENSDARG00000022251 | znf536            | 0.491125319 | -1.025836895 | 2.71E-49    | 7.84E-48    |
| ENSDARG00000013000 | ppfia2            | 0.491115679 | -1.025865213 | 7.02E-39    | 1.39E-37    |
| ENSDARG00000069385 | RGL4              | 0.491101711 | -1.025906245 | 2.58E-47    | 6.97E-46    |
| ENSDARG00000095522 | si:dkey-71b5.3    | 0.490911314 | -1.026465678 | 0.00576187  | 0.01273528  |
| ENSDARG00000092825 | EFCAB10           | 0.490876924 | -1.026566746 | 0.001955215 | 0.004636802 |
| ENSDARG00000086027 | si:ch211-168d23.3 | 0.49086685  | -1.026596355 | 3.94E-15    | 2.56E-14    |
| ENSDARG00000035158 | MCAM (2 of 3)     | 0.490824219 | -1.026721656 | 9.62E-31    | 1.35E-29    |
| ENSDARG00000090650 |                   | 0.490761491 | -1.026906047 | 1.96E-15    | 1.29E-14    |
| ENSDARG00000095022 | thsd7ba           | 0.490490909 | -1.027701698 | 1.04E-22    | 1.03E-21    |
| ENSDARG00000051730 | slc7a10b          | 0.490483898 | -1.027722319 | 2.48E-05    | 7.46E-05    |
| ENSDARG00000078874 |                   | 0.49047138  | -1.02775914  | 0.01009204  | 0.021397294 |
| ENSDARG00000071890 | pcdh2g7           | 0.490389697 | -1.027999426 | 0.016293414 | 0.033276651 |
| ENSDARG00000075393 | spock2            | 0.49037525  | -1.028041929 | 3.96E-42    | 8.85E-41    |
| ENSDARG00000070567 | cadpsb            | 0.490225656 | -1.028482106 | 9.87E-48    | 2.70E-46    |
| ENSDARG00000095608 | si:dkey-57k2.6    | 0.490210926 | -1.028525455 | 0.006190553 | 0.013621326 |
| ENSDARG00000060372 | PLXNA2 (1 of 3)   | 0.489973933 | -1.029223097 | 1.52E-49    | 4.41E-48    |
| ENSDARG00000077357 | LRR61             | 0.489881355 | -1.029495713 | 1.34E-08    | 5.52E-08    |
| ENSDARG00000016348 | DIP2B (2 of 2)    | 0.489846867 | -1.02959728  | 1.20E-38    | 2.35E-37    |
| ENSDARG00000069669 | adra2c            | 0.489833248 | -1.029637393 | 1.46E-07    | 5.48E-07    |
| ENSDARG0000006093  | cdk15             | 0.489716643 | -1.029980867 | 2.27E-07    | 8.40E-07    |
| ENSDARG00000095170 | lrrfip1b          | 0.489711923 | -1.029994774 | 1.19E-32    | 1.82E-31    |
| ENSDARG00000025162 | asic4a            | 0.489660483 | -1.030146324 | 1.14E-10    | 5.47E-10    |
| ENSDARG00000076299 | EMILIN3 (1 of 2)  | 0.48958613  | -1.030365408 | 5.70E-37    | 1.03E-35    |
| ENSDARG0000007678  | ttyh3b            | 0.48956734  | -1.030420779 | 5.29E-35    | 8.87E-34    |
| ENSDARG00000086650 | si:dkeyp-27e10.6  | 0.48955004  | -1.030471762 | 0.000732152 | 0.001841267 |
| ENSDARG00000076768 | REPS2             | 0.48939592  | -1.030926022 | 3.84E-47    | 1.03E-45    |
| ENSDARG00000073963 | C4H12orf56        | 0.489358658 | -1.031035872 | 7.73E-09    | 3.23E-08    |
| ENSDARG00000077872 | si:dkey-52d15.1   | 0.489297973 | -1.031214789 | 3.78E-41    | 8.11E-40    |
| ENSDARG00000035907 | fam49a            | 0.489167568 | -1.031599338 | 2.97E-46    | 7.73E-45    |

|                    |                   |             |              |             |             |
|--------------------|-------------------|-------------|--------------|-------------|-------------|
| ENSDARG00000000189 | sema6e            | 0.488972687 | -1.032174214 | 2.63E-46    | 6.85E-45    |
| ENSDARG00000076244 | uo:ion006         | 0.488847161 | -1.03254462  | 0.000162544 | 0.000445617 |
| ENSDARG00000089829 | CYTH3 (3 of 3)    | 0.488790353 | -1.032712282 | 5.74E-05    | 0.000166299 |
| ENSDARG00000097047 | zgc:56112         | 0.488789615 | -1.032714461 | 7.60E-05    | 0.000217456 |
| ENSDARG00000088567 | VPS72 (2 of 2)    | 0.488722272 | -1.032913241 | 6.16E-08    | 2.37E-07    |
| ENSDARG00000089605 | CABZ01079081.1    | 0.488653297 | -1.033116869 | 5.56E-05    | 0.00016142  |
| ENSDARG00000089795 | SERTAD4           | 0.488640891 | -1.033153498 | 1.25E-33    | 1.99E-32    |
| ENSDARG00000091306 | kcnn1a            | 0.488593978 | -1.033292012 | 9.16E-49    | 2.60E-47    |
| ENSDARG00000095152 | si:ch211-255i3.4  | 0.48843215  | -1.033769928 | 0.000131897 | 0.000366119 |
| ENSDARG00000074505 | mturn             | 0.488417962 | -1.033811838 | 0.000233339 | 0.000625342 |
| ENSDARG00000086331 | si:ch1073-351i9.1 | 0.488224176 | -1.034384357 | 0.013408045 | 0.027811562 |
| ENSDARG00000091269 | si:ch73-27e22.8   | 0.488155904 | -1.034586116 | 0.000532719 | 0.001363617 |
| ENSDARG00000087273 | IFT43             | 0.4881307   | -1.034660605 | 0.002595879 | 0.006038702 |
| ENSDARG00000012833 | foxn3             | 0.488095104 | -1.034765814 | 1.65E-29    | 2.20E-28    |
| ENSDARG00000053272 | RAP1GAP (1 of 3)  | 0.487905777 | -1.035325528 | 6.67E-17    | 4.84E-16    |
| ENSDARG00000007824 | CR847998.1        | 0.487884223 | -1.035389263 | 1.80E-50    | 5.38E-49    |
| ENSDARG00000081800 | CU929237.1        | 0.487794597 | -1.035654316 | 0.013690894 | 0.028367196 |
| ENSDARG00000078603 | myo1hb            | 0.487777183 | -1.035705821 | 0.00154619  | 0.003717371 |
| ENSDARG00000034504 | lmo1              | 0.487715092 | -1.035889477 | 2.14E-48    | 6.00E-47    |
| ENSDARG00000093774 | rbp2b             | 0.487557128 | -1.036356823 | 1.98E-40    | 4.12E-39    |
| ENSDARG00000079687 | rnf10             | 0.487550149 | -1.036377473 | 2.10E-22    | 2.05E-21    |
| ENSDARG00000060222 | scn1ba            | 0.487473693 | -1.03660373  | 7.81E-34    | 1.25E-32    |
| ENSDARG00000092968 |                   | 0.487451876 | -1.0366683   | 0.024186226 | 0.047594447 |
| ENSDARG00000069765 | SYNGAP1 (2 of 2)  | 0.487173785 | -1.037491592 | 2.13E-19    | 1.78E-18    |
| ENSDARG00000094526 | ksr2              | 0.48715114  | -1.037558653 | 2.80E-09    | 1.21E-08    |
| ENSDARG00000078250 | zgc:194398        | 0.487105095 | -1.03769502  | 4.53E-22    | 4.33E-21    |
| ENSDARG00000092260 | WBP1              | 0.48701526  | -1.037961116 | 2.20E-19    | 1.83E-18    |
| ENSDARG00000092997 | si:ch211-89o5.1   | 0.486825853 | -1.038522311 | 0.000176308 | 0.000480694 |
| ENSDARG00000061255 | dusp3a            | 0.48668553  | -1.038938215 | 6.18E-34    | 9.88E-33    |
| ENSDARG00000062884 | MAP3K2            | 0.486617028 | -1.03914129  | 1.38E-14    | 8.66E-14    |

|                    |                 |             |              |             |             |
|--------------------|-----------------|-------------|--------------|-------------|-------------|
| ENSDARG00000061636 | KCNJ9           | 0.486597119 | -1.039200317 | 5.55E-07    | 1.98E-06    |
| ENSDARG00000027512 | asic1b          | 0.486513211 | -1.039449114 | 1.50E-15    | 1.00E-14    |
| ENSDARG00000020901 | gabrp           | 0.486471198 | -1.039573704 | 2.89E-18    | 2.26E-17    |
| ENSDARG00000010023 | CU856539.1      | 0.486255175 | -1.040214492 | 2.62E-47    | 7.07E-46    |
| ENSDARG00000068516 | hapln1b         | 0.486183405 | -1.040427446 | 2.48E-51    | 7.61E-50    |
| ENSDARG00000092155 | apoc2           | 0.486067149 | -1.040772463 | 8.67E-21    | 7.82E-20    |
| ENSDARG00000090443 | CABZ01081904.1  | 0.486052011 | -1.040817393 | 5.71E-21    | 5.19E-20    |
| ENSDARG00000027852 | plekhf1         | 0.486044669 | -1.040839187 | 1.30E-21    | 1.22E-20    |
| ENSDARG00000070844 | gamt            | 0.485960044 | -1.041090397 | 8.36E-15    | 5.32E-14    |
| ENSDARG00000073824 | RASGRF1         | 0.485787932 | -1.041601445 | 1.81E-22    | 1.78E-21    |
| ENSDARG00000051879 | abcc8           | 0.485736218 | -1.041755033 | 2.43E-34    | 3.96E-33    |
| ENSDARG00000089549 | BAALC           | 0.48565702  | -1.04199028  | 8.31E-12    | 4.33E-11    |
| ENSDARG00000039435 | rgs17           | 0.485624445 | -1.04208705  | 5.31E-39    | 1.05E-37    |
| ENSDARG00000025747 | mapk10          | 0.485607765 | -1.042136604 | 4.09E-41    | 8.76E-40    |
| ENSDARG00000079068 | adam12          | 0.485519218 | -1.042399693 | 3.75E-12    | 2.00E-11    |
| ENSDARG00000042270 | arsa            | 0.485397909 | -1.042760201 | 1.56E-24    | 1.68E-23    |
| ENSDARG00000044894 | zgc:113307      | 0.485328556 | -1.042966347 | 2.38E-29    | 3.16E-28    |
| ENSDARG00000036308 | nod1            | 0.485155484 | -1.043480915 | 2.54E-05    | 7.64E-05    |
| ENSDARG00000086333 | CABZ01084952.1  | 0.485063783 | -1.043753629 | 0.000213031 | 0.000573783 |
| ENSDARG00000045556 | OTUD7A          | 0.48493419  | -1.044139122 | 1.13E-16    | 8.07E-16    |
| ENSDARG00000051915 | pde5ab          | 0.484759548 | -1.04465878  | 1.86E-10    | 8.82E-10    |
| ENSDARG00000074959 | pcdh2g3         | 0.484714688 | -1.044792295 | 0.008236174 | 0.017710922 |
| ENSDARG00000071823 | adarb2          | 0.484696757 | -1.044845664 | 1.47E-09    | 6.50E-09    |
| ENSDARG00000035791 | si:busm1-71b9.3 | 0.484691717 | -1.044860667 | 0.015822469 | 0.032382324 |
| ENSDARG00000026406 | anxa5a          | 0.484687211 | -1.044874078 | 6.82E-09    | 2.86E-08    |
| ENSDARG00000063159 | si:dkey-32e23.4 | 0.484645738 | -1.04499753  | 6.32E-26    | 7.28E-25    |
| ENSDARG00000079151 | CU459012.3      | 0.484507706 | -1.045408483 | 3.40E-17    | 2.50E-16    |
| ENSDARG00000055698 | pcnxl2          | 0.484466184 | -1.045532125 | 2.21E-47    | 5.98E-46    |
| ENSDARG00000009568 | CA10 (1 of 2)   | 0.484405297 | -1.045713455 | 1.60E-07    | 5.99E-07    |
| ENSDARG00000074145 | BX119910.4      | 0.484387693 | -1.045765884 | 0.004690764 | 0.010513425 |

|                     |                  |             |              |             |             |
|---------------------|------------------|-------------|--------------|-------------|-------------|
| ENSDARG00000014402  | smc1b            | 0.483920093 | -1.047159252 | 0.021619504 | 0.043025493 |
| ENSDARG00000007561  | cdh23            | 0.483695398 | -1.047829282 | 0.000205199 | 0.000554002 |
| ENSDARG000000056101 | kcnd3            | 0.48335133  | -1.048855882 | 2.10E-31    | 3.05E-30    |
| ENSDARG000000025875 | kctd2            | 0.483333392 | -1.048909425 | 3.14E-16    | 2.17E-15    |
| ENSDARG000000060415 | arhgef28         | 0.483151597 | -1.049452165 | 1.11E-48    | 3.13E-47    |
| ENSDARG000000055302 | grid2            | 0.483117915 | -1.049552742 | 1.97E-26    | 2.32E-25    |
| ENSDARG00000016531  | klhl4            | 0.483024728 | -1.049831046 | 1.09E-21    | 1.02E-20    |
| ENSDARG000000020795 | rac3b            | 0.482979333 | -1.049966638 | 4.10E-50    | 1.22E-48    |
| ENSDARG00000004964  | cyp4t8           | 0.482970624 | -1.049992654 | 5.23E-07    | 1.87E-06    |
| ENSDARG000000058252 | adamts15b        | 0.482862533 | -1.050315572 | 0.007877002 | 0.016998358 |
| ENSDARG000000077470 | FAM163A (1 of 2) | 0.482682132 | -1.050854672 | 4.41E-08    | 1.73E-07    |
| ENSDARG000000075817 | METTL24          | 0.482584066 | -1.051147815 | 6.85E-09    | 2.87E-08    |
| ENSDARG000000015931 |                  | 0.482194623 | -1.052312532 | 6.45E-52    | 2.02E-50    |
| ENSDARG000000063411 | LRRC73           | 0.482114379 | -1.052552636 | 1.72E-16    | 1.21E-15    |
| ENSDARG000000087491 | efr3a            | 0.481997309 | -1.052903004 | 0.001189693 | 0.002903768 |
| ENSDARG000000010042 | dnm1a            | 0.481883872 | -1.053242579 | 2.54E-47    | 6.86E-46    |
| ENSDARG000000077430 | CU695076.1       | 0.481783857 | -1.053542041 | 2.25E-07    | 8.34E-07    |
| ENSDARG000000063433 | atp2b2           | 0.481692076 | -1.053816904 | 1.98E-42    | 4.54E-41    |
| ENSDARG000000019304 | phactr3b         | 0.48166674  | -1.053892789 | 2.94E-38    | 5.61E-37    |
| ENSDARG000000070929 | sox14            | 0.481521653 | -1.05432742  | 3.09E-42    | 6.94E-41    |
| ENSDARG000000078123 | SLITRK3 (2 of 2) | 0.481454733 | -1.054527935 | 3.10E-22    | 3.00E-21    |
| ENSDARG000000092659 | ppp3r1a          | 0.481284341 | -1.055038611 | 1.61E-52    | 5.15E-51    |
| ENSDARG000000063695 | FARP1 (1 of 2)   | 0.481205979 | -1.055273528 | 1.98E-16    | 1.39E-15    |
| ENSDARG000000058585 | chst2b           | 0.481162398 | -1.055404193 | 2.89E-19    | 2.39E-18    |
| ENSDARG000000086300 | FAM107A          | 0.480883656 | -1.056240201 | 6.73E-29    | 8.77E-28    |
| ENSDARG000000079227 | plekhs1          | 0.480830689 | -1.056399116 | 0.017815226 | 0.036065836 |
| ENSDARG000000014675 | efna3a           | 0.480782087 | -1.05654495  | 1.34E-28    | 1.72E-27    |
| ENSDARG000000078940 | pcdh2g12         | 0.48076684  | -1.056590702 | 4.12E-07    | 1.49E-06    |
| ENSDARG000000079008 | si:dkey-7f3.9    | 0.480750735 | -1.056639031 | 1.08E-40    | 2.27E-39    |
| ENSDARG000000004158 | TMEM63C          | 0.480702837 | -1.056782776 | 1.18E-30    | 1.66E-29    |



|                    |                    |             |              |             |             |
|--------------------|--------------------|-------------|--------------|-------------|-------------|
| ENSDARG00000077115 | si:ch73-44m9.1     | 0.480614182 | -1.057048873 | 0.00269902  | 0.006266322 |
| ENSDARG00000016213 | BX088711.1         | 0.48057174  | -1.057176282 | 2.29E-05    | 6.91E-05    |
| ENSDARG00000089957 | lgi2a              | 0.480545405 | -1.057255343 | 2.65E-09    | 1.15E-08    |
| ENSDARG00000052713 | lrrtm1             | 0.48049102  | -1.057418626 | 1.76E-43    | 4.19E-42    |
| ENSDARG00000063144 | shisa7             | 0.480479642 | -1.057452791 | 3.94E-53    | 1.29E-51    |
| ENSDARG00000058649 | trim46b            | 0.480469479 | -1.057483306 | 5.66E-29    | 7.40E-28    |
| ENSDARG00000074519 | si:dkey-224j12.3   | 0.480325912 | -1.057914457 | 0.010574937 | 0.022329495 |
| ENSDARG00000008788 | camk1gb            | 0.480190104 | -1.058322423 | 2.87E-11    | 1.44E-10    |
| ENSDARG00000053205 | ppfia4             | 0.480031885 | -1.058797857 | 2.42E-23    | 2.49E-22    |
| ENSDARG00000026335 | susd4              | 0.480015238 | -1.058847891 | 4.65E-14    | 2.82E-13    |
| ENSDARG00000023933 | skila              | 0.479958737 | -1.059017714 | 4.58E-42    | 1.02E-40    |
| ENSDARG00000014792 | lrrc4bb            | 0.47993852  | -1.059078485 | 4.10E-52    | 1.30E-50    |
| ENSDARG00000056108 | ndufa4             | 0.479884666 | -1.059240381 | 1.04E-48    | 2.95E-47    |
| ENSDARG00000017213 | prss35             | 0.479864849 | -1.059299959 | 9.45E-51    | 2.86E-49    |
| ENSDARG00000087698 | PCDHGC5 (12 of 31) | 0.479758596 | -1.059619439 | 0.000392754 | 0.001024351 |
| ENSDARG00000078461 | pde6c              | 0.479723469 | -1.059725073 | 2.94E-15    | 1.93E-14    |
| ENSDARG00000019525 | tbcelb             | 0.479584373 | -1.060143446 | 1.62E-28    | 2.08E-27    |
| ENSDARG00000004577 | zgc:194665         | 0.479550885 | -1.060244188 | 6.46E-24    | 6.78E-23    |
| ENSDARG00000038693 | gng7               | 0.479514583 | -1.060353404 | 3.05E-37    | 5.58E-36    |
| ENSDARG00000038359 | enosf1             | 0.479492644 | -1.060419412 | 7.35E-48    | 2.02E-46    |
| ENSDARG00000058255 |                    | 0.479413742 | -1.06065683  | 3.83E-22    | 3.67E-21    |
| ENSDARG00000078740 | il1rapl1b          | 0.479408029 | -1.060674024 | 1.06E-09    | 4.76E-09    |
| ENSDARG00000027903 | ADAMTSL3           | 0.479403256 | -1.060688389 | 4.54E-15    | 2.94E-14    |
| ENSDARG00000091600 | CR352229.1         | 0.479360811 | -1.060816126 | 3.59E-47    | 9.66E-46    |
| ENSDARG00000051908 | opn4xb             | 0.479269815 | -1.061090016 | 3.35E-06    | 1.10E-05    |
| ENSDARG00000062889 | FAM78B (1 of 2)    | 0.479194479 | -1.061316808 | 0.001720589 | 0.004107469 |
| ENSDARG00000059425 | sntg2              | 0.479078463 | -1.061666137 | 8.65E-05    | 0.00024603  |
| ENSDARG00000086663 | UNC79 (1 of 2)     | 0.478757327 | -1.062633528 | 9.16E-13    | 5.08E-12    |
| ENSDARG00000012204 | CDK18              | 0.478631656 | -1.063012278 | 1.88E-13    | 1.09E-12    |
| ENSDARG00000020145 | zgc:73340          | 0.478630726 | -1.06301508  | 3.78E-11    | 1.89E-10    |

|                    |                   |             |              |             |             |
|--------------------|-------------------|-------------|--------------|-------------|-------------|
| ENSDARG00000055874 | cpe               | 0.478526935 | -1.063327962 | 1.60E-30    | 2.23E-29    |
| ENSDARG00000042859 | SLC5A6 (2 of 2)   | 0.478311482 | -1.063977669 | 4.91E-11    | 2.43E-10    |
| ENSDARG00000024890 |                   | 0.47822615  | -1.064235076 | 5.85E-09    | 2.47E-08    |
| ENSDARG00000086946 | TOX2 (2 of 2)     | 0.478180487 | -1.064372835 | 6.57E-06    | 2.10E-05    |
| ENSDARG00000061481 |                   | 0.477950315 | -1.065067445 | 7.39E-32    | 1.09E-30    |
| ENSDARG00000005670 | ttbk2             | 0.477870857 | -1.065307308 | 6.40E-26    | 7.37E-25    |
| ENSDARG00000097783 | si:ch211-278d18.5 | 0.477814765 | -1.06547666  | 8.12E-06    | 2.57E-05    |
| ENSDARG00000015880 | slc6a5            | 0.477804743 | -1.06550692  | 2.32E-27    | 2.83E-26    |
| ENSDARG00000086825 | CU861664.1        | 0.477779762 | -1.06558235  | 6.41E-05    | 0.00018482  |
| ENSDARG00000002510 | dmbx1b            | 0.477762027 | -1.065635902 | 2.33E-10    | 1.09E-09    |
| ENSDARG00000062208 | prrt1             | 0.477706285 | -1.065804238 | 1.23E-50    | 3.70E-49    |
| ENSDARG00000096611 | taok2b            | 0.47764949  | -1.065975769 | 0.002384049 | 0.005571016 |
| ENSDARG00000060053 | KCNH2 (2 of 2)    | 0.477632032 | -1.066028501 | 1.64E-06    | 5.57E-06    |
| ENSDARG00000091623 | TMEM74 (2 of 2)   | 0.477574142 | -1.066203371 | 1.44E-12    | 7.90E-12    |
| ENSDARG00000074528 | PRTFDC1 (2 of 2)  | 0.477486597 | -1.066467856 | 1.20E-12    | 6.60E-12    |
| ENSDARG00000042974 | sypa              | 0.477372175 | -1.066813617 | 4.68E-52    | 1.48E-50    |
| ENSDARG00000000503 | stx1b             | 0.477162466 | -1.06744753  | 4.39E-21    | 4.02E-20    |
| ENSDARG00000078581 | crebrf            | 0.477161583 | -1.067450202 | 1.01E-15    | 6.80E-15    |
| ENSDARG00000039335 | st6gal2a          | 0.477140621 | -1.06751358  | 3.30E-47    | 8.90E-46    |
| ENSDARG00000093112 | espnl             | 0.47708642  | -1.067677474 | 9.33E-06    | 2.94E-05    |
| ENSDARG00000096420 | si:dkey-13n23.4   | 0.476957644 | -1.068066942 | 8.57E-07    | 3.00E-06    |
| ENSDARG00000044015 | gfra2b            | 0.476952232 | -1.068083312 | 5.89E-11    | 2.89E-10    |
| ENSDARG00000044577 | chst8             | 0.476785857 | -1.068586652 | 0.013078613 | 0.027189772 |
| ENSDARG00000056957 | GABRG1            | 0.476637564 | -1.069035438 | 3.71E-09    | 1.59E-08    |
| ENSDARG00000017437 | adcyl3b           | 0.476590536 | -1.069177792 | 0.000100024 | 0.000282194 |
| ENSDARG00000034808 | kcnip1b           | 0.476540881 | -1.069328111 | 4.08E-33    | 6.33E-32    |
| ENSDARG00000013227 | glulc             | 0.476534852 | -1.069346362 | 0.003470227 | 0.007930471 |
| ENSDARG00000040703 | si:ch211-242n18.1 | 0.47651097  | -1.069418667 | 6.30E-05    | 0.000181916 |
| ENSDARG00000092281 | flnb              | 0.475969888 | -1.07105779  | 6.67E-21    | 6.04E-20    |
| ENSDARG00000051852 | kcnc1a            | 0.475777216 | -1.071641909 | 2.52E-29    | 3.33E-28    |

|                     |                    |             |              |             |             |
|---------------------|--------------------|-------------|--------------|-------------|-------------|
| ENSDARG00000002564  | syng1a             | 0.475650767 | -1.072025392 | 2.16E-46    | 5.66E-45    |
| ENSDARG000000071021 | papss2a            | 0.475604692 | -1.072165147 | 7.68E-38    | 1.44E-36    |
| ENSDARG000000077399 | UBASH3B (2 of 2)   | 0.475492305 | -1.072506102 | 1.20E-10    | 5.75E-10    |
| ENSDARG00000004322  | USH1G (1 of 2)     | 0.475460902 | -1.072601384 | 0.009587331 | 0.0204018   |
| ENSDARG000000095312 | si:ch211-74m13.1   | 0.475303502 | -1.073079064 | 9.03E-07    | 3.15E-06    |
| ENSDARG000000055158 | prox1a             | 0.474872388 | -1.074388223 | 2.37E-54    | 8.09E-53    |
| ENSDARG000000097930 | si:ch211-161c3.6   | 0.474812916 | -1.074568915 | 5.75E-22    | 5.46E-21    |
| ENSDARG000000090387 | ONECUT2            | 0.474688175 | -1.074947985 | 1.29E-11    | 6.65E-11    |
| ENSDARG000000014215 | cdh13              | 0.474593637 | -1.075235335 | 3.06E-42    | 6.89E-41    |
| ENSDARG000000087724 | PCDHGC5 (13 of 31) | 0.474274357 | -1.076206229 | 0.000509834 | 0.001309586 |
| ENSDARG000000052648 | hs3st4             | 0.474115617 | -1.076689181 | 0.000545035 | 0.001393636 |
| ENSDARG000000060854 | kctd3              | 0.473954374 | -1.077179911 | 1.48E-28    | 1.90E-27    |
| ENSDARG000000042418 | wbscr17            | 0.473891103 | -1.07737252  | 3.96E-17    | 2.91E-16    |
| ENSDARG000000092903 | C18H15orf48        | 0.473860039 | -1.077467093 | 0.002743352 | 0.006364048 |
| ENSDARG000000037607 | NOL4L (1 of 2)     | 0.47376097  | -1.077768746 | 8.79E-30    | 1.19E-28    |
| ENSDARG000000097358 | si:dkey-151m15.8   | 0.473681451 | -1.078010917 | 7.20E-07    | 2.54E-06    |
| ENSDARG000000062688 | gpnmb              | 0.473669289 | -1.078047958 | 1.63E-49    | 4.74E-48    |
| ENSDARG000000058005 | hgd                | 0.473265653 | -1.079277871 | 5.99E-41    | 1.27E-39    |
| ENSDARG000000087736 | si:dkey-118k5.3    | 0.473212823 | -1.079438926 | 2.41E-13    | 1.39E-12    |
| ENSDARG000000061265 | lmln               | 0.473088664 | -1.079817504 | 7.72E-42    | 1.71E-40    |
| ENSDARG000000091359 | CAMSAP3 (2 of 2)   | 0.473056311 | -1.079916168 | 6.23E-49    | 1.77E-47    |
| ENSDARG000000070078 | abcb11b            | 0.472923497 | -1.080321271 | 8.83E-05    | 0.000251042 |
| ENSDARG000000078548 | GLP2R              | 0.47271659  | -1.080952598 | 1.62E-05    | 4.97E-05    |
| ENSDARG000000094417 | si:dkey-13n15.2    | 0.472592863 | -1.081330253 | 0.002910155 | 0.006727927 |
| ENSDARG000000078302 | BRINP1             | 0.472538805 | -1.081495286 | 1.45E-28    | 1.87E-27    |
| ENSDARG000000086475 | SHISA6 (1 of 2)    | 0.472511108 | -1.081579848 | 0.001340282 | 0.003248993 |
| ENSDARG00000004305  | vangl1             | 0.472276836 | -1.082295318 | 3.39E-38    | 6.44E-37    |
| ENSDARG000000069048 | serpinf1           | 0.472072457 | -1.082919783 | 1.51E-54    | 5.20E-53    |
| ENSDARG000000037613 | LGALS8 (2 of 2)    | 0.472049291 | -1.082990582 | 1.06E-07    | 4.01E-07    |
| ENSDARG000000060637 | clstn2             | 0.472036264 | -1.083030398 | 5.30E-36    | 9.27E-35    |

|                    |                    |             |              |             |             |
|--------------------|--------------------|-------------|--------------|-------------|-------------|
| ENSDARG00000022437 | CD81 (1 of 2)      | 0.472028601 | -1.083053818 | 4.78E-35    | 8.02E-34    |
| ENSDARG00000018066 | ptchd1             | 0.471901574 | -1.08344211  | 1.72E-16    | 1.21E-15    |
| ENSDARG00000089877 | C7H4orf48          | 0.471869231 | -1.083540995 | 7.53E-55    | 2.61E-53    |
| ENSDARG00000014891 | robo2              | 0.471677437 | -1.084127505 | 2.45E-51    | 7.54E-50    |
| ENSDARG00000078588 | CABZ01081821.1     | 0.47159385  | -1.084383192 | 0.002129701 | 0.005017927 |
| ENSDARG00000067824 | CNTNAP3            | 0.471551896 | -1.084511542 | 3.11E-36    | 5.48E-35    |
| ENSDARG00000088669 | PCDHGC5 (22 of 31) | 0.471481627 | -1.084726544 | 4.02E-07    | 1.45E-06    |
| ENSDARG00000053383 | rprma              | 0.471464305 | -1.084779548 | 0.00049298  | 0.001268525 |
| ENSDARG00000039497 | ccdc85a            | 0.471456187 | -1.08480439  | 1.54E-12    | 8.40E-12    |
| ENSDARG00000026820 | gc3                | 0.471094845 | -1.085910551 | 6.29E-12    | 3.31E-11    |
| ENSDARG00000031540 | tmem200a           | 0.471065827 | -1.085999419 | 2.16E-10    | 1.02E-09    |
| ENSDARG00000075139 | hdac5              | 0.471041612 | -1.08607358  | 2.06E-33    | 3.24E-32    |
| ENSDARG00000074564 | fam57bb            | 0.47102788  | -1.086115639 | 3.31E-18    | 2.58E-17    |
| ENSDARG00000079396 | LRFN5 (2 of 2)     | 0.471001262 | -1.086197169 | 2.62E-41    | 5.66E-40    |
| ENSDARG00000087102 | si:ch1073-164k15.3 | 0.470984288 | -1.086249162 | 4.95E-08    | 1.93E-07    |
| ENSDARG00000037815 | b4galt5            | 0.470912028 | -1.086470522 | 0.000834259 | 0.00208074  |
| ENSDARG00000090179 | si:ch211-117c9.1   | 0.470893545 | -1.086527147 | 0.003139343 | 0.007231305 |
| ENSDARG00000077465 | SORCS2             | 0.470475974 | -1.087807045 | 6.21E-49    | 1.77E-47    |
| ENSDARG00000068247 | luzp2              | 0.4703252   | -1.088269462 | 8.70E-39    | 1.71E-37    |
| ENSDARG00000069297 | upf3a              | 0.470270509 | -1.088437232 | 2.84E-43    | 6.72E-42    |
| ENSDARG00000002197 | pygl               | 0.470179292 | -1.088717093 | 4.38E-51    | 1.33E-49    |
| ENSDARG00000060865 | scai               | 0.470041524 | -1.089139882 | 1.90E-18    | 1.50E-17    |
| ENSDARG00000071709 | CT971495.1         | 0.470030625 | -1.089173336 | 6.08E-07    | 2.16E-06    |
| ENSDARG00000088096 | CABZ01043829.1     | 0.469982251 | -1.089321822 | 0.010323965 | 0.021840132 |
| ENSDARG00000074723 | myo10l1            | 0.469975201 | -1.089343461 | 3.32E-39    | 6.63E-38    |
| ENSDARG00000070586 | ctgfb              | 0.469850321 | -1.089726859 | 9.23E-11    | 4.46E-10    |
| ENSDARG00000089394 | CABZ01081333.1     | 0.469785183 | -1.089926884 | 0.000181116 | 0.000492539 |
| ENSDARG00000009922 | dmbx1a             | 0.469477058 | -1.090873435 | 5.77E-45    | 1.45E-43    |
| ENSDARG00000035309 | entpd3             | 0.469420279 | -1.091047927 | 1.26E-51    | 3.91E-50    |
| ENSDARG00000042948 | dnajc5aa           | 0.469379945 | -1.091171894 | 1.24E-40    | 2.60E-39    |

|                    |                   |             |              |             |             |
|--------------------|-------------------|-------------|--------------|-------------|-------------|
| ENSDARG00000005332 | lipi              | 0.469315139 | -1.091371096 | 0.006276748 | 0.013800298 |
| ENSDARG00000097328 | si:ch73-305a18.1  | 0.469262535 | -1.091532811 | 0.000530468 | 0.001358712 |
| ENSDARG00000056478 | ACAP2 (1 of 2)    | 0.469192493 | -1.091748164 | 2.01E-45    | 5.13E-44    |
| ENSDARG00000075046 | RNF151            | 0.468949245 | -1.092496309 | 0.000175379 | 0.000478403 |
| ENSDARG00000091408 | MTCL1             | 0.468921262 | -1.0925824   | 2.53E-27    | 3.08E-26    |
| ENSDARG00000071055 | ZNF512B           | 0.468872079 | -1.092733725 | 5.03E-07    | 1.80E-06    |
| ENSDARG00000060609 | CD109             | 0.468866029 | -1.092752341 | 1.49E-14    | 9.33E-14    |
| ENSDARG00000056105 | syt11b            | 0.468714547 | -1.093218524 | 4.60E-46    | 1.19E-44    |
| ENSDARG00000014652 | ankrd13b          | 0.468591919 | -1.093596021 | 2.40E-32    | 3.61E-31    |
| ENSDARG00000089588 | BX324216.2        | 0.468574163 | -1.093650689 | 0.001472929 | 0.003549947 |
| ENSDARG00000097262 | si:ch211-255f14.2 | 0.468391392 | -1.094213531 | 1.15E-10    | 5.52E-10    |
| ENSDARG00000001154 | rimbp2            | 0.468299328 | -1.094497128 | 9.87E-17    | 7.10E-16    |
| ENSDARG00000088736 | si:ch211-250n8.1  | 0.468276379 | -1.094567829 | 0.000443469 | 0.001148089 |
| ENSDARG00000058492 | si:dkey-30c15.17  | 0.468164861 | -1.09491144  | 2.79E-08    | 1.11E-07    |
| ENSDARG00000062314 | rasl10a           | 0.467443726 | -1.0971354   | 0.000260206 | 0.000693324 |
| ENSDARG00000031855 | mst1              | 0.467324052 | -1.097504805 | 1.00E-42    | 2.32E-41    |
| ENSDARG00000086183 | vkorc1            | 0.467276407 | -1.097651899 | 1.73E-15    | 1.15E-14    |
| ENSDARG00000091916 | ugt5b4            | 0.466928349 | -1.098726912 | 1.15E-35    | 1.98E-34    |
| ENSDARG00000089817 | NPTN (2 of 2)     | 0.466891354 | -1.098841223 | 2.43E-21    | 2.25E-20    |
| ENSDARG00000045420 | epdr1             | 0.466837393 | -1.099007971 | 1.17E-25    | 1.33E-24    |
| ENSDARG00000056768 | rprml             | 0.466806951 | -1.099102053 | 7.87E-09    | 3.28E-08    |
| ENSDARG00000093730 | si:dkey-253d23.1  | 0.466755062 | -1.099262426 | 0.000155251 | 0.000427106 |
| ENSDARG00000097235 | si:dkeyp-34b8.3   | 0.466703014 | -1.09942331  | 4.84E-05    | 0.000141669 |
| ENSDARG00000091116 | pkhd1l1           | 0.466689582 | -1.099464832 | 2.72E-55    | 9.59E-54    |
| ENSDARG00000063307 | SGSM2             | 0.466472767 | -1.100135236 | 7.57E-22    | 7.15E-21    |
| ENSDARG00000087364 | si:ch73-140j24.4  | 0.46646942  | -1.100145589 | 4.51E-43    | 1.06E-41    |
| ENSDARG00000053358 | basp1             | 0.466427746 | -1.100274482 | 4.46E-38    | 8.43E-37    |
| ENSDARG00000014280 | dlgap1a           | 0.466398304 | -1.100365552 | 3.02E-07    | 1.10E-06    |
| ENSDARG00000061409 | bivm              | 0.466250577 | -1.100822585 | 1.08E-25    | 1.23E-24    |
| ENSDARG00000041323 | csdc2a            | 0.466122609 | -1.101218604 | 3.60E-36    | 6.34E-35    |

|                    |                   |             |              |             |             |
|--------------------|-------------------|-------------|--------------|-------------|-------------|
| ENSDARG00000087040 | rhbd1             | 0.465857582 | -1.102039121 | 1.33E-07    | 5.02E-07    |
| ENSDARG00000094172 | si:ch73-263f13.1  | 0.465803986 | -1.10220511  | 5.86E-05    | 0.000169784 |
| ENSDARG00000077656 | si:ch211-71k24.5  | 0.465433177 | -1.103354041 | 3.36E-21    | 3.09E-20    |
| ENSDARG00000077539 | BX119910.7        | 0.465212852 | -1.104037142 | 2.49E-07    | 9.17E-07    |
| ENSDARG00000095034 | C24H8orf34        | 0.465151141 | -1.104228529 | 6.49E-09    | 2.73E-08    |
| ENSDARG00000092455 | si:ch211-246e12.3 | 0.464979774 | -1.104760133 | 0.020927339 | 0.041765013 |
| ENSDARG00000044605 | stx12l            | 0.464977701 | -1.104766564 | 7.19E-42    | 1.59E-40    |
| ENSDARG00000075792 | iqsec3a           | 0.464837893 | -1.105200413 | 6.12E-19    | 4.98E-18    |
| ENSDARG00000011487 | gnaq              | 0.464705338 | -1.105611877 | 2.50E-22    | 2.43E-21    |
| ENSDARG00000035508 | barhl1a           | 0.464703031 | -1.105619039 | 2.53E-32    | 3.80E-31    |
| ENSDARG00000068274 | ANKRD65           | 0.464573744 | -1.106020475 | 4.80E-08    | 1.88E-07    |
| ENSDARG00000009930 | cadm2a            | 0.464125332 | -1.107413654 | 4.84E-18    | 3.72E-17    |
| ENSDARG00000061692 | yjefn3            | 0.464015833 | -1.107754063 | 5.96E-20    | 5.13E-19    |
| ENSDARG00000079583 | ppp2r2bb          | 0.463944577 | -1.107975624 | 1.38E-22    | 1.36E-21    |
| ENSDARG00000038855 | chmp5a            | 0.463724472 | -1.108660232 | 1.44E-22    | 1.42E-21    |
| ENSDARG00000060545 | TMC8              | 0.46361344  | -1.109005704 | 0.012636327 | 0.026359692 |
| ENSDARG00000026484 | rab15             | 0.463424519 | -1.109593717 | 4.10E-36    | 7.20E-35    |
| ENSDARG00000094677 |                   | 0.463362996 | -1.109785258 | 0.005615138 | 0.012432238 |
| ENSDARG00000077468 | si:ch73-206p6.1   | 0.463313236 | -1.109940196 | 9.57E-23    | 9.50E-22    |
| ENSDARG00000089847 |                   | 0.463272356 | -1.110067497 | 7.19E-05    | 0.000206363 |
| ENSDARG00000057159 | ankrd29           | 0.46297253  | -1.111001501 | 2.61E-12    | 1.40E-11    |
| ENSDARG00000097706 | si:dkey-11a7.3    | 0.462959229 | -1.111042949 | 1.99E-25    | 2.23E-24    |
| ENSDARG00000074652 | smtna             | 0.462839816 | -1.111415117 | 0.000909833 | 0.002256357 |
| ENSDARG00000035578 | hs3st1l2          | 0.462544915 | -1.112334632 | 3.26E-23    | 3.33E-22    |
| ENSDARG00000078416 | zeb2b             | 0.462507126 | -1.112452501 | 2.98E-53    | 9.80E-52    |
| ENSDARG00000076679 | RAI1              | 0.462337447 | -1.112981876 | 3.05E-54    | 1.03E-52    |
| ENSDARG00000059881 | fam69b            | 0.462241053 | -1.1132827   | 1.02E-34    | 1.68E-33    |
| ENSDARG00000038185 | gh1               | 0.462173431 | -1.113493771 | 1.32E-08    | 5.43E-08    |
| ENSDARG00000002816 | rasgrf2b          | 0.462017423 | -1.113980837 | 3.14E-06    | 1.04E-05    |
| ENSDARG00000096979 | NPC2 (2 of 2)     | 0.462001104 | -1.114031797 | 1.33E-32    | 2.02E-31    |

|                    |                  |             |              |             |             |
|--------------------|------------------|-------------|--------------|-------------|-------------|
| ENSDARG00000061446 | smap2            | 0.46187515  | -1.114425169 | 9.32E-09    | 3.87E-08    |
| ENSDARG00000062519 | abcc13           | 0.461485485 | -1.115642822 | 1.37E-24    | 1.48E-23    |
| ENSDARG00000067683 | PDE1C (2 of 2)   | 0.461419447 | -1.115849286 | 0.01125437  | 0.023672668 |
| ENSDARG00000089252 | CABZ01058048.1   | 0.461362916 | -1.11602605  | 1.67E-24    | 1.80E-23    |
| ENSDARG00000004291 | hecw1b           | 0.46133927  | -1.116099992 | 1.22E-40    | 2.57E-39    |
| ENSDARG00000095412 | si:dkey-183p4.9  | 0.461115865 | -1.116798791 | 0.018580916 | 0.037453147 |
| ENSDARG00000008720 | lmo3             | 0.461003823 | -1.11714938  | 5.27E-57    | 1.93E-55    |
| ENSDARG00000079014 | sema4f           | 0.460840888 | -1.117659369 | 8.36E-18    | 6.36E-17    |
| ENSDARG00000063412 | cers1            | 0.460815426 | -1.117739081 | 6.69E-32    | 9.87E-31    |
| ENSDARG00000088432 | si:dkey-162h11.3 | 0.460793344 | -1.117808217 | 4.34E-11    | 2.15E-10    |
| ENSDARG00000056262 | slc35g2a         | 0.460628332 | -1.118324945 | 1.24E-32    | 1.88E-31    |
| ENSDARG00000079348 | GRIN2B (2 of 2)  | 0.460596062 | -1.11842602  | 6.41E-29    | 8.35E-28    |
| ENSDARG00000038366 | cyp2k18          | 0.460563786 | -1.118527116 | 0.000426215 | 0.001106143 |
| ENSDARG00000053499 | isl2b            | 0.460491789 | -1.118752663 | 6.15E-37    | 1.11E-35    |
| ENSDARG00000094118 | si:dkey-21o22.2  | 0.460457061 | -1.118861469 | 0.004710299 | 0.010553045 |
| ENSDARG00000074739 | slitrk3b         | 0.460223378 | -1.119593826 | 2.34E-14    | 1.44E-13    |
| ENSDARG00000079343 | si:ch211-241b2.4 | 0.460212715 | -1.119627252 | 0.000858988 | 0.002139038 |
| ENSDARG00000053673 |                  | 0.460138872 | -1.119858757 | 1.52E-16    | 1.07E-15    |
| ENSDARG00000055791 | SLC3A2 (3 of 3)  | 0.460034697 | -1.120185419 | 6.46E-44    | 1.57E-42    |
| ENSDARG00000087096 | CR847847.1       | 0.459997245 | -1.120302874 | 0.007784939 | 0.016815682 |
| ENSDARG00000075592 | tnfaip8l2a       | 0.459924543 | -1.120530908 | 0.000140945 | 0.000389521 |
| ENSDARG00000059348 | rxfp3.3b         | 0.459842478 | -1.120788352 | 0.000521787 | 0.001338528 |
| ENSDARG00000061436 | col6a2           | 0.459766472 | -1.121026831 | 8.47E-36    | 1.47E-34    |
| ENSDARG00000006983 | celf3b           | 0.459723439 | -1.121161871 | 6.02E-52    | 1.89E-50    |
| ENSDARG00000075724 | pcdh2g1          | 0.459672511 | -1.1213217   | 0.012031834 | 0.025203516 |
| ENSDARG00000061051 | BRINP3 (1 of 3)  | 0.459596634 | -1.121559862 | 1.53E-11    | 7.85E-11    |
| ENSDARG00000059535 | LRRTM4 (1 of 4)  | 0.459193738 | -1.122825128 | 0.00026881  | 0.000715074 |
| ENSDARG00000077940 | VSTM2B           | 0.459002376 | -1.123426475 | 1.86E-33    | 2.94E-32    |
| ENSDARG00000056092 |                  | 0.458666499 | -1.12448256  | 1.60E-57    | 5.96E-56    |
| ENSDARG00000053454 | CABZ01012080.1   | 0.458530152 | -1.12491149  | 1.25E-09    | 5.59E-09    |

|                    |                   |             |              |             |             |
|--------------------|-------------------|-------------|--------------|-------------|-------------|
| ENSDARG00000074921 | FAM117B (2 of 2)  | 0.458523725 | -1.12493171  | 2.25E-55    | 7.93E-54    |
| ENSDARG00000069095 | gls2              | 0.458302576 | -1.1256277   | 3.32E-10    | 1.54E-09    |
| ENSDARG00000077514 | SLITRK1           | 0.458289635 | -1.125668437 | 2.96E-40    | 6.14E-39    |
| ENSDARG00000076757 | EPHB1             | 0.458178442 | -1.126018515 | 6.00E-15    | 3.85E-14    |
| ENSDARG00000079302 | and2              | 0.458164832 | -1.126061371 | 4.83E-13    | 2.73E-12    |
| ENSDARG00000067692 | CDH18 (2 of 2)    | 0.458040256 | -1.126453695 | 1.22E-12    | 6.70E-12    |
| ENSDARG00000056797 | ppp2r2c           | 0.458025745 | -1.126499404 | 1.05E-54    | 3.64E-53    |
| ENSDARG00000006832 | GALNT9            | 0.45792703  | -1.12681037  | 6.75E-37    | 1.22E-35    |
| ENSDARG00000052155 | LRRC8A (2 of 2)   | 0.457450246 | -1.128313257 | 8.04E-36    | 1.40E-34    |
| ENSDARG00000059775 | slc32a1           | 0.457343936 | -1.128648573 | 1.41E-59    | 5.53E-58    |
| ENSDARG00000069038 | si:ch211-242e8.1  | 0.457284815 | -1.128835083 | 0.00110974  | 0.002720305 |
| ENSDARG00000003403 | tenm1             | 0.457204143 | -1.129089618 | 3.32E-57    | 1.23E-55    |
| ENSDARG00000093349 | si:ch211-141e20.2 | 0.457173828 | -1.129185281 | 7.15E-07    | 2.52E-06    |
| ENSDARG00000042107 | CNGB1 (1 of 2)    | 0.456771916 | -1.130454143 | 3.21E-05    | 9.57E-05    |
| ENSDARG00000086902 | DIRAS2            | 0.45642356  | -1.131554833 | 0.001509065 | 0.00363211  |
| ENSDARG00000014953 | cnih3             | 0.456378579 | -1.131697017 | 6.13E-17    | 4.46E-16    |
| ENSDARG00000086207 | grin2da           | 0.456281098 | -1.132005207 | 8.59E-27    | 1.03E-25    |
| ENSDARG00000069101 | NAPB (2 of 2)     | 0.455784787 | -1.133575325 | 1.98E-31    | 2.88E-30    |
| ENSDARG00000092680 | si:dkey-58f10.12  | 0.455649551 | -1.13400345  | 1.11E-09    | 4.96E-09    |
| ENSDARG00000042477 | nr2c2             | 0.455582911 | -1.134214463 | 5.74E-45    | 1.44E-43    |
| ENSDARG00000036878 | sh3bgrl2          | 0.455299543 | -1.135112082 | 2.67E-27    | 3.25E-26    |
| ENSDARG00000008674 | chrnb2a           | 0.455117728 | -1.13568831  | 0.003920573 | 0.008887445 |
| ENSDARG00000025108 | magixa            | 0.454875922 | -1.136455023 | 5.47E-42    | 1.22E-40    |
| ENSDARG00000096920 | SRRM4             | 0.454871163 | -1.136470119 | 1.12E-14    | 7.09E-14    |
| ENSDARG00000077687 | rp1               | 0.454819022 | -1.1366355   | 0.000163587 | 0.00044813  |
| ENSDARG00000079559 | FAM196A (3 of 3)  | 0.454798929 | -1.136699239 | 0.003438264 | 0.00786312  |
| ENSDARG00000076076 | crtc1b            | 0.454780282 | -1.136758391 | 5.22E-08    | 2.03E-07    |
| ENSDARG00000026084 | KCNS1             | 0.454706718 | -1.136991776 | 0.001049738 | 0.002584817 |
| ENSDARG00000013647 | cntn3a.2          | 0.454649915 | -1.137172013 | 0.000274881 | 0.000730402 |
| ENSDARG00000073704 | si:dkeyp-72g9.4   | 0.454630578 | -1.137233374 | 3.71E-54    | 1.25E-52    |



|                    |                   |             |              |             |             |
|--------------------|-------------------|-------------|--------------|-------------|-------------|
| ENSDARG00000087955 | si:ch211-127b16.4 | 0.454535686 | -1.137534528 | 1.49E-07    | 5.60E-07    |
| ENSDARG00000038981 |                   | 0.454522452 | -1.137576533 | 2.31E-41    | 5.00E-40    |
| ENSDARG00000078645 | CAMKK2            | 0.454417655 | -1.137909207 | 8.87E-54    | 2.96E-52    |
| ENSDARG00000009477 | prkar2ab          | 0.454353778 | -1.138112018 | 5.89E-10    | 2.68E-09    |
| ENSDARG00000020292 |                   | 0.454328887 | -1.138191056 | 7.34E-16    | 4.97E-15    |
| ENSDARG00000030311 | TMC2 (1 of 2)     | 0.454275597 | -1.138360287 | 0.002510489 | 0.00585108  |
| ENSDARG00000092730 | si:dkey-22i16.3   | 0.4542311   | -1.138501608 | 1.88E-30    | 2.61E-29    |
| ENSDARG00000035532 | zgc:110329        | 0.454162661 | -1.138718994 | 2.17E-42    | 4.94E-41    |
| ENSDARG00000091498 | BX571715.2        | 0.454155409 | -1.138742032 | 3.65E-19    | 3.01E-18    |
| ENSDARG00000079204 | adam11            | 0.453986775 | -1.139277825 | 3.98E-37    | 7.25E-36    |
| ENSDARG00000079249 | OGDHL             | 0.453921115 | -1.139486495 | 1.98E-06    | 6.66E-06    |
| ENSDARG00000044551 | atg9a             | 0.453894097 | -1.139572369 | 4.31E-47    | 1.16E-45    |
| ENSDARG00000089271 | si:dkey-114c15.7  | 0.453644942 | -1.140364522 | 3.28E-59    | 1.28E-57    |
| ENSDARG00000043012 | napg              | 0.453598591 | -1.140511935 | 2.15E-44    | 5.32E-43    |
| ENSDARG00000018809 | abhd3             | 0.453487427 | -1.140865542 | 6.56E-31    | 9.32E-30    |
| ENSDARG00000087599 | TENM3 (2 of 2)    | 0.453395883 | -1.141156802 | 4.10E-31    | 5.88E-30    |
| ENSDARG00000089465 | CABZ01048956.1    | 0.453341564 | -1.141329657 | 2.84E-30    | 3.92E-29    |
| ENSDARG00000092813 | FNDC7 (8 of 8)    | 0.453233714 | -1.141672913 | 1.57E-14    | 9.79E-14    |
| ENSDARG00000057394 | rab33a            | 0.453101499 | -1.142093832 | 4.29E-15    | 2.78E-14    |
| ENSDARG00000089696 |                   | 0.453089101 | -1.142133308 | 1.08E-10    | 5.18E-10    |
| ENSDARG00000096327 | cd164l2           | 0.453003286 | -1.142406581 | 1.18E-07    | 4.45E-07    |
| ENSDARG00000007654 | nsfa              | 0.452843239 | -1.142916377 | 3.08E-58    | 1.16E-56    |
| ENSDARG00000036567 | aanat1            | 0.452817893 | -1.142997126 | 0.00415357  | 0.00937821  |
| ENSDARG00000011929 | plp1b             | 0.452762692 | -1.143173011 | 2.27E-07    | 8.38E-07    |
| ENSDARG00000062106 | klf5b             | 0.452414911 | -1.144281614 | 0.004190612 | 0.009452081 |
| ENSDARG00000079540 | CACNA2D2 (3 of 3) | 0.452370379 | -1.144423631 | 1.15E-11    | 5.93E-11    |
| ENSDARG00000087431 | zgc:173962        | 0.452297294 | -1.144656731 | 0.001126743 | 0.002759366 |
| ENSDARG00000005780 | npy8br            | 0.451986549 | -1.145648256 | 2.71E-05    | 8.14E-05    |
| ENSDARG00000089933 | rasal3            | 0.451874384 | -1.146006318 | 0.000154563 | 0.000425253 |
| ENSDARG00000020450 | cacng8a           | 0.451850819 | -1.146081556 | 1.18E-24    | 1.28E-23    |

|                    |                    |             |              |             |             |
|--------------------|--------------------|-------------|--------------|-------------|-------------|
| ENSDARG00000097474 | si:ch211-158e19.1  | 0.451801137 | -1.146240194 | 0.000731262 | 0.00183919  |
| ENSDARG00000007663 | amph               | 0.45178119  | -1.14630389  | 8.14E-61    | 3.28E-59    |
| ENSDARG00000059677 | mamdc2a            | 0.451772616 | -1.146331269 | 8.89E-15    | 5.64E-14    |
| ENSDARG00000023903 | atf2               | 0.451761517 | -1.146366715 | 8.93E-12    | 4.65E-11    |
| ENSDARG00000074308 | fam211ba           | 0.451624649 | -1.146803867 | 1.63E-34    | 2.67E-33    |
| ENSDARG00000063345 | creg1              | 0.451575064 | -1.146962273 | 7.61E-50    | 2.24E-48    |
| ENSDARG00000097406 | si:dkey-81e3.2     | 0.451397564 | -1.147529462 | 3.72E-15    | 2.42E-14    |
| ENSDARG00000041609 | adarb1a            | 0.451160767 | -1.14828648  | 1.29E-48    | 3.62E-47    |
| ENSDARG00000071091 | chrn3a             | 0.450985737 | -1.148846288 | 7.27E-09    | 3.04E-08    |
| ENSDARG00000040781 | zgc:113317         | 0.4508994   | -1.149122504 | 3.50E-26    | 4.08E-25    |
| ENSDARG00000068008 | arhgap44           | 0.450876492 | -1.149195804 | 4.27E-27    | 5.14E-26    |
| ENSDARG00000089449 | KAZN (3 of 3)      | 0.450851537 | -1.149275656 | 0.003302234 | 0.007571306 |
| ENSDARG00000057921 | ccdc136b           | 0.450647845 | -1.149927604 | 1.31E-55    | 4.67E-54    |
| ENSDARG00000097730 | si:ch1073-443n13.3 | 0.450620628 | -1.150014739 | 4.21E-12    | 2.23E-11    |
| ENSDARG00000011693 | ttc36              | 0.450604299 | -1.150067019 | 1.97E-10    | 9.30E-10    |
| ENSDARG00000061918 | cplx2              | 0.450507828 | -1.150375921 | 4.75E-57    | 1.74E-55    |
| ENSDARG00000017266 | scml4              | 0.450419289 | -1.150659485 | 2.05E-44    | 5.09E-43    |
| ENSDARG00000074089 | BX119910.2         | 0.450209438 | -1.151331794 | 1.42E-05    | 4.38E-05    |
| ENSDARG00000058601 | gdap1              | 0.450106112 | -1.151662939 | 4.81E-28    | 6.03E-27    |
| ENSDARG00000074310 | rbfox3l            | 0.44973662  | -1.152847735 | 1.71E-05    | 5.25E-05    |
| ENSDARG00000010158 | nbeab              | 0.449715693 | -1.152914867 | 7.27E-25    | 7.97E-24    |
| ENSDARG00000062812 | glsa               | 0.449548341 | -1.153451834 | 3.16E-43    | 7.47E-42    |
| ENSDARG00000076480 | mcf2lb             | 0.449407948 | -1.153902454 | 9.52E-31    | 1.34E-29    |
| ENSDARG00000060393 | fibcd1             | 0.449406156 | -1.153908209 | 2.13E-17    | 1.58E-16    |
| ENSDARG00000076972 | si:dkey-208k22.3   | 0.449404734 | -1.153912774 | 2.29E-07    | 8.47E-07    |
| ENSDARG00000058445 | PDILT              | 0.449328106 | -1.154158787 | 1.17E-08    | 4.83E-08    |
| ENSDARG00000055183 | etv1               | 0.449173217 | -1.154656188 | 2.90E-14    | 1.78E-13    |
| ENSDARG00000087295 | ZFYVE9 (3 of 3)    | 0.449080441 | -1.154954207 | 0.004778117 | 0.010689486 |
| ENSDARG00000070467 | lactbl1b           | 0.448986423 | -1.155256276 | 2.03E-07    | 7.53E-07    |
| ENSDARG00000057649 | satb1a             | 0.448978772 | -1.155280859 | 8.79E-45    | 2.20E-43    |

|                    |                   |             |              |             |             |
|--------------------|-------------------|-------------|--------------|-------------|-------------|
| ENSDARG00000061421 | BRSK2 (1 of 2)    | 0.448890995 | -1.155562939 | 4.66E-08    | 1.82E-07    |
| ENSDARG00000077986 | TMEM151A (1 of 2) | 0.448829996 | -1.155759    | 2.16E-08    | 8.69E-08    |
| ENSDARG00000025106 | ppp3cb            | 0.44881235  | -1.15581572  | 3.49E-47    | 9.39E-46    |
| ENSDARG00000093851 | si:ch73-332k15.1  | 0.448663639 | -1.156293828 | 1.09E-13    | 6.43E-13    |
| ENSDARG00000098024 | si:dkey-262k9.2   | 0.448656782 | -1.156315876 | 3.70E-35    | 6.24E-34    |
| ENSDARG00000075830 | syt3              | 0.448408858 | -1.157113318 | 2.06E-38    | 3.97E-37    |
| ENSDARG00000074521 | map6a             | 0.448214406 | -1.157739077 | 1.34E-15    | 8.93E-15    |
| ENSDARG00000007856 | rtn4rl1a          | 0.448181334 | -1.157845532 | 0.001137399 | 0.002784261 |
| ENSDARG00000026095 | FP102191.1        | 0.448066709 | -1.158214557 | 0.0017453   | 0.004162962 |
| ENSDARG00000060085 | kcnq3             | 0.447991659 | -1.158456222 | 9.59E-15    | 6.07E-14    |
| ENSDARG00000031647 | stat2             | 0.447974588 | -1.158511199 | 5.49E-35    | 9.20E-34    |
| ENSDARG00000056019 | TTBK1 (1 of 2)    | 0.447844252 | -1.158931005 | 1.75E-40    | 3.65E-39    |
| ENSDARG00000030761 | syt16             | 0.447557354 | -1.15985552  | 3.22E-25    | 3.58E-24    |
| ENSDARG00000058966 | zgc:112332        | 0.4472291   | -1.160914032 | 1.56E-19    | 1.31E-18    |
| ENSDARG00000062634 | kat2b             | 0.447001175 | -1.161649471 | 6.98E-24    | 7.32E-23    |
| ENSDARG00000056833 | svopa             | 0.446841866 | -1.162163733 | 5.42E-18    | 4.17E-17    |
| ENSDARG00000092456 | si:ch211-188i4.4  | 0.446780747 | -1.162361077 | 1.18E-08    | 4.87E-08    |
| ENSDARG00000058892 | cep170b           | 0.446496098 | -1.163280528 | 5.64E-23    | 5.68E-22    |
| ENSDARG00000096307 | si:ch73-379f7.5   | 0.446374075 | -1.163674855 | 3.22E-06    | 1.06E-05    |
| ENSDARG00000055839 | MARCH4 (1 of 2)   | 0.446346392 | -1.163764329 | 1.09E-10    | 5.23E-10    |
| ENSDARG00000096853 | si:dkey-103g5.7   | 0.446339394 | -1.163786952 | 0.015515778 | 0.031818824 |
| ENSDARG00000077847 | olfm2a            | 0.446320084 | -1.163849368 | 2.18E-53    | 7.20E-52    |
| ENSDARG00000078981 | faxcb             | 0.446141096 | -1.164428048 | 9.24E-20    | 7.86E-19    |
| ENSDARG00000095819 | AMER3             | 0.44580503  | -1.165515199 | 2.81E-09    | 1.21E-08    |
| ENSDARG00000076373 | vopp1             | 0.445733495 | -1.165746716 | 1.03E-50    | 3.12E-49    |
| ENSDARG00000020581 | OTOF (1 of 2)     | 0.445710686 | -1.165820544 | 1.17E-46    | 3.09E-45    |
| ENSDARG00000074543 | unc5a             | 0.445606974 | -1.166156282 | 7.12E-07    | 2.51E-06    |
| ENSDARG00000076028 | sez6l             | 0.445480374 | -1.166566221 | 6.55E-32    | 9.67E-31    |
| ENSDARG00000078542 | inpp5ja           | 0.445344052 | -1.167007771 | 1.03E-05    | 3.23E-05    |
| ENSDARG00000039502 | eef1a1a           | 0.445275145 | -1.16723101  | 7.22E-50    | 2.13E-48    |

|                    |                   |             |              |             |             |
|--------------------|-------------------|-------------|--------------|-------------|-------------|
| ENSDARG00000043406 | slc8a1b           | 0.445050643 | -1.167958582 | 2.28E-42    | 5.17E-41    |
| ENSDARG00000058392 | adcy2a            | 0.445013114 | -1.168080242 | 9.83E-14    | 5.83E-13    |
| ENSDARG00000008275 | klhl24b           | 0.445010485 | -1.168088768 | 1.40E-58    | 5.38E-57    |
| ENSDARG00000044591 | CT025910.1        | 0.444965955 | -1.168233137 | 2.41E-39    | 4.84E-38    |
| ENSDARG00000040261 | runx2a            | 0.444940881 | -1.168314435 | 0.006102186 | 0.013440853 |
| ENSDARG00000097526 | si:ch73-112l6.6   | 0.444819344 | -1.168708566 | 0.001124887 | 0.002755295 |
| ENSDARG00000059988 | gpr153            | 0.444743404 | -1.168954886 | 1.44E-05    | 4.45E-05    |
| ENSDARG00000043673 | BEGAIN (1 of 2)   | 0.444573807 | -1.169505142 | 5.98E-28    | 7.48E-27    |
| ENSDARG00000088925 | ATP9A             | 0.4445163   | -1.169691774 | 1.89E-23    | 1.95E-22    |
| ENSDARG00000078466 | cetn2             | 0.444499884 | -1.169745052 | 7.75E-22    | 7.32E-21    |
| ENSDARG00000059523 | RIMS4             | 0.444330162 | -1.170296017 | 1.80E-09    | 7.90E-09    |
| ENSDARG00000092722 | UNC5D (3 of 3)    | 0.444275192 | -1.17047451  | 6.39E-07    | 2.26E-06    |
| ENSDARG00000091411 | si:ch211-214p13.9 | 0.443945911 | -1.171544181 | 0.015566462 | 0.031911246 |
| ENSDARG00000079251 | nlgn2b            | 0.443717197 | -1.172287627 | 4.07E-28    | 5.12E-27    |
| ENSDARG00000030687 | PHKA2             | 0.443713582 | -1.17229938  | 4.78E-54    | 1.61E-52    |
| ENSDARG00000018619 | CERS4 (1 of 2)    | 0.443599023 | -1.172671908 | 9.63E-16    | 6.49E-15    |
| ENSDARG00000076401 | cacng3b           | 0.443469287 | -1.173093901 | 4.99E-40    | 1.03E-38    |
| ENSDARG00000079891 | dnajc6            | 0.44340679  | -1.173297234 | 1.60E-64    | 7.07E-63    |
| ENSDARG00000089195 | pcdh2g20          | 0.443385044 | -1.173367988 | 0.000698314 | 0.001760532 |
| ENSDARG00000053761 | si:dkey-187j14.4  | 0.443280192 | -1.173709199 | 2.36E-06    | 7.90E-06    |
| ENSDARG00000077771 | pcdh2g28          | 0.443265479 | -1.173757083 | 3.15E-05    | 9.41E-05    |
| ENSDARG00000059272 | KBTBD11           | 0.443263196 | -1.173764513 | 3.51E-28    | 4.42E-27    |
| ENSDARG00000004869 | penka             | 0.443222255 | -1.173897771 | 7.18E-08    | 2.75E-07    |
| ENSDARG00000075048 | lonrf1            | 0.443099474 | -1.174297481 | 1.50E-34    | 2.47E-33    |
| ENSDARG00000077755 | PCDHGC4 (7 of 9)  | 0.443047107 | -1.174467993 | 2.25E-18    | 1.77E-17    |
| ENSDARG00000093064 | si:dkey-92j12.6   | 0.443033632 | -1.174511873 | 2.20E-07    | 8.15E-07    |
| ENSDARG00000035544 | etnppl            | 0.442971049 | -1.174715682 | 2.08E-38    | 3.98E-37    |
| ENSDARG00000076639 | esamb             | 0.442930509 | -1.174847723 | 1.82E-07    | 6.77E-07    |
| ENSDARG00000063361 | si:ch211-1e14.1   | 0.442915783 | -1.174895687 | 6.70E-26    | 7.70E-25    |
| ENSDARG00000040048 | GALNTL6           | 0.442706117 | -1.175578788 | 2.16E-36    | 3.83E-35    |

|                    |                  |             |              |             |             |
|--------------------|------------------|-------------|--------------|-------------|-------------|
| ENSDARG00000040430 | nptxra           | 0.442647669 | -1.175769269 | 4.59E-30    | 6.28E-29    |
| ENSDARG00000076460 | bai1a            | 0.442421911 | -1.176505258 | 5.19E-57    | 1.90E-55    |
| ENSDARG00000088444 | CU929133.1       | 0.44235822  | -1.176712964 | 5.50E-22    | 5.23E-21    |
| ENSDARG00000039884 | CABZ01068274.1   | 0.44235245  | -1.176731783 | 1.38E-52    | 4.44E-51    |
| ENSDARG00000053448 | si:ch211-251f6.6 | 0.442119698 | -1.177491081 | 2.03E-22    | 1.98E-21    |
| ENSDARG00000008861 | tfap2e           | 0.441973464 | -1.177968342 | 1.63E-46    | 4.30E-45    |
| ENSDARG00000079231 | slc7a14b         | 0.441905466 | -1.17819032  | 0.001676463 | 0.004010555 |
| ENSDARG00000075713 | shox2            | 0.441746094 | -1.178710717 | 9.81E-48    | 2.69E-46    |
| ENSDARG00000018259 | atp1a3a          | 0.44165455  | -1.179009721 | 1.15E-25    | 1.30E-24    |
| ENSDARG00000041179 | crygm5           | 0.441652866 | -1.179015221 | 1.04E-11    | 5.37E-11    |
| ENSDARG00000039352 | paldb1b          | 0.441570598 | -1.179283981 | 8.99E-27    | 1.07E-25    |
| ENSDARG00000015002 | cdh4             | 0.441429048 | -1.179746527 | 7.68E-52    | 2.40E-50    |
| ENSDARG00000037933 | kcnc3b           | 0.441315537 | -1.180117556 | 2.17E-11    | 1.10E-10    |
| ENSDARG00000077994 | b4galt2          | 0.44127714  | -1.180243084 | 6.49E-19    | 5.27E-18    |
| ENSDARG00000019579 | ldb2a            | 0.441150506 | -1.180657155 | 2.21E-26    | 2.60E-25    |
| ENSDARG00000033845 | igsf9ba          | 0.44108904  | -1.18085818  | 3.75E-64    | 1.64E-62    |
| ENSDARG00000021820 | SLC45A4 (1 of 2) | 0.441034227 | -1.181037471 | 5.55E-09    | 2.35E-08    |
| ENSDARG00000034321 | palmdb           | 0.441011737 | -1.181111044 | 0.000140438 | 0.000388195 |
| ENSDARG00000007247 | ric8a            | 0.440966065 | -1.181260457 | 1.46E-37    | 2.71E-36    |
| ENSDARG00000077124 | BRSK1 (1 of 2)   | 0.440781914 | -1.181863065 | 1.99E-15    | 1.31E-14    |
| ENSDARG00000015964 | zgc:153311       | 0.44073977  | -1.182001013 | 5.69E-05    | 0.000164887 |
| ENSDARG00000056618 | xk               | 0.440682883 | -1.182187235 | 1.81E-20    | 1.61E-19    |
| ENSDARG00000006849 | asic2            | 0.44031187  | -1.183402357 | 3.08E-30    | 4.23E-29    |
| ENSDARG00000080015 | lrrtm4l1         | 0.44023759  | -1.18364576  | 0.000100743 | 0.000284027 |
| ENSDARG00000038731 | slc25a36a        | 0.440189993 | -1.183801746 | 2.94E-64    | 1.29E-62    |
| ENSDARG00000007195 | GRM2 (2 of 2)    | 0.440158332 | -1.183905518 | 1.02E-47    | 2.78E-46    |
| ENSDARG00000060322 | zgc:153654       | 0.440142801 | -1.183956425 | 0.005360391 | 0.011903461 |
| ENSDARG00000069291 | CU184872.1       | 0.440057273 | -1.184236794 | 1.10E-07    | 4.16E-07    |
| ENSDARG00000078998 | lhfp14a          | 0.440051235 | -1.184256589 | 6.81E-60    | 2.70E-58    |
| ENSDARG00000092970 | si:ch211-11c15.3 | 0.439963163 | -1.184545359 | 9.68E-53    | 3.13E-51    |

|                    |                   |             |              |             |             |
|--------------------|-------------------|-------------|--------------|-------------|-------------|
| ENSDARG00000062976 | iffo1a            | 0.439527703 | -1.185973994 | 6.28E-10    | 2.86E-09    |
| ENSDARG00000044748 | or115-12          | 0.439382619 | -1.186450293 | 0.012913424 | 0.026879788 |
| ENSDARG00000031387 | cers4a            | 0.439329896 | -1.186623419 | 7.69E-28    | 9.60E-27    |
| ENSDARG00000067841 | ccdc177           | 0.439304515 | -1.186706768 | 2.88E-35    | 4.89E-34    |
| ENSDARG00000037145 | slc8a4b           | 0.43925285  | -1.186876447 | 1.47E-10    | 7.01E-10    |
| ENSDARG00000017490 | cel.1             | 0.439230242 | -1.186950705 | 2.01E-05    | 6.12E-05    |
| ENSDARG00000094522 | si:ch211-14c7.2   | 0.439214601 | -1.18700208  | 1.39E-38    | 2.70E-37    |
| ENSDARG00000069600 | zgc:109889        | 0.439087027 | -1.187421184 | 7.28E-66    | 3.35E-64    |
| ENSDARG00000042613 | crp3              | 0.438816758 | -1.188309473 | 0.010583434 | 0.022345023 |
| ENSDARG00000081299 | si:ch211-152f6.6  | 0.438630052 | -1.188923436 | 4.10E-66    | 1.91E-64    |
| ENSDARG00000078125 | rusc1             | 0.438575811 | -1.18910185  | 2.32E-61    | 9.52E-60    |
| ENSDARG00000005095 | glcea             | 0.438570155 | -1.189120457 | 2.22E-26    | 2.61E-25    |
| ENSDARG00000096639 | si:ch211-101l18.8 | 0.438367148 | -1.189788409 | 1.07E-06    | 3.70E-06    |
| ENSDARG00000054003 | rargb             | 0.43829648  | -1.190021001 | 7.69E-17    | 5.57E-16    |
| ENSDARG00000079468 | RHOBTB1           | 0.438187636 | -1.190379316 | 9.49E-09    | 3.93E-08    |
| ENSDARG00000023822 | zgc:73349         | 0.438164546 | -1.190455343 | 2.62E-05    | 7.88E-05    |
| ENSDARG00000041569 | ces2              | 0.438115577 | -1.190616586 | 7.60E-25    | 8.32E-24    |
| ENSDARG00000077608 | GPR137B (1 of 2)  | 0.438115077 | -1.190618232 | 5.00E-08    | 1.95E-07    |
| ENSDARG00000027082 | hmbox1a           | 0.437891387 | -1.191355021 | 2.36E-10    | 1.11E-09    |
| ENSDARG00000006607 | gpr27             | 0.43785078  | -1.191488815 | 7.58E-35    | 1.26E-33    |
| ENSDARG00000076103 | grid2ipa          | 0.437838763 | -1.191528408 | 1.14E-05    | 3.55E-05    |
| ENSDARG00000075271 | rapgef5a          | 0.437816134 | -1.191602974 | 6.41E-58    | 2.40E-56    |
| ENSDARG00000053323 | zgc:112285        | 0.437777563 | -1.191730081 | 4.20E-53    | 1.37E-51    |
| ENSDARG00000005775 | scn8aa            | 0.437733763 | -1.191874431 | 1.28E-61    | 5.24E-60    |
| ENSDARG00000059067 | jupb              | 0.437552698 | -1.192471312 | 2.78E-13    | 1.60E-12    |
| ENSDARG00000071192 | cx40.8            | 0.437545272 | -1.192495796 | 4.55E-06    | 1.48E-05    |
| ENSDARG00000091792 | akap12a           | 0.437447778 | -1.192817295 | 5.83E-38    | 1.10E-36    |
| ENSDARG00000032623 | rcan3             | 0.437282288 | -1.193363182 | 8.31E-54    | 2.78E-52    |
| ENSDARG00000061647 | nrxn1a            | 0.437101709 | -1.193959075 | 2.46E-60    | 9.82E-59    |
| ENSDARG00000025648 | fibpb             | 0.437036749 | -1.194173497 | 0.017541168 | 0.035575286 |

|                    |                  |             |              |             |             |
|--------------------|------------------|-------------|--------------|-------------|-------------|
| ENSDARG00000063158 | SLC24A2 (2 of 2) | 0.437007332 | -1.194270609 | 6.10E-13    | 3.43E-12    |
| ENSDARG00000011042 | pgbd5            | 0.436665256 | -1.19540035  | 1.98E-16    | 1.39E-15    |
| ENSDARG00000025974 | MAGI3 (1 of 2)   | 0.43656651  | -1.195726634 | 4.99E-10    | 2.29E-09    |
| ENSDARG00000088900 | si:dkey-21o19.2  | 0.436564801 | -1.195732281 | 2.39E-36    | 4.23E-35    |
| ENSDARG00000016771 | tfa              | 0.436369743 | -1.196377023 | 2.32E-07    | 8.57E-07    |
| ENSDARG00000036584 | st8sia5          | 0.436276254 | -1.196686144 | 1.58E-64    | 7.00E-63    |
| ENSDARG00000075161 | defbl1           | 0.436021071 | -1.19753024  | 7.35E-62    | 3.04E-60    |
| ENSDARG00000060711 | SV2B (2 of 3)    | 0.435802418 | -1.198253892 | 6.12E-52    | 1.92E-50    |
| ENSDARG00000004282 | zgc:77375        | 0.435801054 | -1.198258411 | 2.08E-53    | 6.88E-52    |
| ENSDARG00000077112 | sc:d0413         | 0.435763127 | -1.19838397  | 9.98E-27    | 1.19E-25    |
| ENSDARG00000078151 | GRIK5 (2 of 2)   | 0.43575077  | -1.19842488  | 7.91E-26    | 9.05E-25    |
| ENSDARG00000091715 | si:dkey-162h11.2 | 0.435536077 | -1.199135867 | 6.15E-35    | 1.03E-33    |
| ENSDARG00000045904 | nr2e3            | 0.435518839 | -1.199192969 | 3.88E-48    | 1.07E-46    |
| ENSDARG00000071011 | cdk5r2a          | 0.43536781  | -1.199693354 | 1.26E-64    | 5.62E-63    |
| ENSDARG00000034229 | kcnip3a          | 0.435355158 | -1.199735279 | 0.00905004  | 0.019322122 |
| ENSDARG00000058876 | mmp16b           | 0.435223434 | -1.200171856 | 1.62E-25    | 1.82E-24    |
| ENSDARG00000028354 | stxbp6l          | 0.435220437 | -1.200181791 | 1.13E-09    | 5.04E-09    |
| ENSDARG00000069438 | neur1aa          | 0.435114825 | -1.200531921 | 4.65E-31    | 6.63E-30    |
| ENSDARG00000059885 | frmd3            | 0.435058648 | -1.200718197 | 8.54E-13    | 4.75E-12    |
| ENSDARG00000076878 | fam196ab         | 0.435044856 | -1.200763934 | 4.42E-05    | 0.000129841 |
| ENSDARG00000043858 | cdk19            | 0.435006564 | -1.200890925 | 1.12E-13    | 6.60E-13    |
| ENSDARG00000086084 | CU571170.2       | 0.434908513 | -1.201216147 | 0.016607206 | 0.033842111 |
| ENSDARG00000054378 | pcbp3            | 0.43484298  | -1.201433551 | 1.28E-31    | 1.87E-30    |
| ENSDARG00000045945 | syn2a            | 0.434536427 | -1.202450971 | 3.01E-67    | 1.45E-65    |
| ENSDARG00000093232 | si:dkey-202p8.1  | 0.434477013 | -1.202648246 | 1.60E-10    | 7.60E-10    |
| ENSDARG00000075803 |                  | 0.434454163 | -1.202724121 | 1.56E-22    | 1.53E-21    |
| ENSDARG00000097322 | si:dkey-81l17.6  | 0.434108193 | -1.203873444 | 3.18E-19    | 2.63E-18    |
| ENSDARG00000008127 | pcdh15b          | 0.433966932 | -1.20434298  | 1.19E-17    | 8.97E-17    |
| ENSDARG00000063354 | ABTB1            | 0.433894908 | -1.204582441 | 1.09E-27    | 1.35E-26    |
| ENSDARG00000061110 | zbtb44           | 0.433620864 | -1.20549392  | 1.21E-15    | 8.09E-15    |

|                    |                   |             |              |             |             |
|--------------------|-------------------|-------------|--------------|-------------|-------------|
| ENSDARG00000086739 | CU929219.1        | 0.433466601 | -1.206007258 | 7.83E-23    | 7.81E-22    |
| ENSDARG00000090615 | BX957297.2        | 0.433434991 | -1.206112468 | 2.00E-08    | 8.09E-08    |
| ENSDARG00000036577 | atp6v0cb          | 0.433358296 | -1.206367773 | 8.32E-43    | 1.94E-41    |
| ENSDARG00000091641 | CABZ01007222.1    | 0.433060455 | -1.207359656 | 8.03E-35    | 1.33E-33    |
| ENSDARG00000089334 | ednrb1a           | 0.43303105  | -1.207457618 | 4.22E-50    | 1.25E-48    |
| ENSDARG00000037122 | TENM2 (2 of 2)    | 0.432808135 | -1.208200478 | 7.81E-65    | 3.49E-63    |
| ENSDARG00000077596 | si:ch211-269m17.1 | 0.432796343 | -1.208239787 | 3.38E-35    | 5.72E-34    |
| ENSDARG00000036428 | EMP3 (1 of 2)     | 0.432713253 | -1.208516786 | 9.30E-56    | 3.33E-54    |
| ENSDARG00000092671 | si:ch1073-345a8.1 | 0.432437794 | -1.209435478 | 0.001451403 | 0.003501038 |
| ENSDARG00000079618 | sik2a             | 0.432350677 | -1.209726147 | 8.46E-07    | 2.96E-06    |
| ENSDARG00000016584 | rgs7              | 0.432180216 | -1.210295065 | 2.11E-36    | 3.74E-35    |
| ENSDARG00000060656 | si:ch211-10a23.2  | 0.431747667 | -1.211739714 | 2.58E-48    | 7.19E-47    |
| ENSDARG00000027497 | mast1a            | 0.431712244 | -1.211858085 | 2.08E-21    | 1.93E-20    |
| ENSDARG00000039256 | speg              | 0.431697745 | -1.211906539 | 2.72E-62    | 1.14E-60    |
| ENSDARG00000086991 | pbx1a             | 0.43162636  | -1.21214512  | 1.51E-32    | 2.29E-31    |
| ENSDARG00000088934 | BX322612.1        | 0.431532415 | -1.212459162 | 0.013011146 | 0.027063374 |
| ENSDARG00000074902 | NOL4L (2 of 2)    | 0.431308256 | -1.213208762 | 1.45E-29    | 1.94E-28    |
| ENSDARG00000026979 | krt1-c5           | 0.431225976 | -1.213484011 | 3.09E-41    | 6.65E-40    |
| ENSDARG00000087586 | pcdh2ab2          | 0.4312245   | -1.213488949 | 0.000123877 | 0.000345036 |
| ENSDARG00000097170 | pcdh1a3           | 0.431071058 | -1.21400239  | 1.37E-54    | 4.73E-53    |
| ENSDARG00000037805 | lgals3bpa         | 0.431069905 | -1.214006251 | 0.022759241 | 0.045085291 |
| ENSDARG00000088913 | CABZ01006980.1    | 0.430888793 | -1.214612521 | 0.02274777  | 0.04506885  |
| ENSDARG00000055754 | smc1a             | 0.430600557 | -1.215577909 | 2.86E-32    | 4.29E-31    |
| ENSDARG00000037373 | ephb2a            | 0.430581856 | -1.215640566 | 8.31E-34    | 1.33E-32    |
| ENSDARG00000087974 | pcdh2ab12         | 0.43035425  | -1.216403377 | 2.71E-07    | 9.95E-07    |
| ENSDARG00000087681 | DRAXIN (2 of 2)   | 0.430304391 | -1.216570532 | 7.63E-09    | 3.19E-08    |
| ENSDARG00000076601 | arhgef9b          | 0.430291799 | -1.216612751 | 9.98E-10    | 4.48E-09    |
| ENSDARG00000059616 | hs3st2            | 0.430097401 | -1.217264681 | 5.53E-10    | 2.52E-09    |
| ENSDARG00000012460 | rassf4            | 0.430032081 | -1.217483802 | 1.86E-24    | 1.99E-23    |
| ENSDARG00000035555 | gbgt1l3           | 0.429949202 | -1.217761878 | 2.40E-13    | 1.39E-12    |



|                    |                   |             |              |             |             |
|--------------------|-------------------|-------------|--------------|-------------|-------------|
| ENSDARG00000062400 | LRRN2             | 0.429284303 | -1.219994675 | 3.53E-06    | 1.16E-05    |
| ENSDARG00000087131 | ifnlr1            | 0.429273442 | -1.220031174 | 0.002300588 | 0.005390177 |
| ENSDARG00000077572 | si:ch211-193k19.2 | 0.429235165 | -1.22015982  | 0.000114516 | 0.000320315 |
| ENSDARG00000052657 | si:dkey-90l8.3    | 0.42918626  | -1.220324204 | 2.01E-09    | 8.79E-09    |
| ENSDARG00000062325 | shank2            | 0.428964416 | -1.221070119 | 1.71E-31    | 2.49E-30    |
| ENSDARG00000045143 | hbbe2             | 0.428830796 | -1.221519581 | 5.17E-69    | 2.57E-67    |
| ENSDARG00000043806 | postna            | 0.428604836 | -1.222279968 | 4.60E-66    | 2.13E-64    |
| ENSDARG00000019861 | fgl2              | 0.428493075 | -1.222656205 | 4.94E-10    | 2.26E-09    |
| ENSDARG00000058243 | phactr3a          | 0.428445042 | -1.222817939 | 1.27E-43    | 3.05E-42    |
| ENSDARG00000055479 |                   | 0.42843554  | -1.222849933 | 0.007883377 | 0.017006332 |
| ENSDARG00000068214 | ccni              | 0.428367816 | -1.223078002 | 3.27E-31    | 4.70E-30    |
| ENSDARG00000053547 | jakmip2           | 0.428329338 | -1.223207599 | 1.64E-58    | 6.25E-57    |
| ENSDARG00000090808 |                   | 0.428310132 | -1.22327229  | 1.03E-05    | 3.23E-05    |
| ENSDARG00000067798 | ppapdc1a          | 0.428295412 | -1.223321872 | 0.007879135 | 0.016998472 |
| ENSDARG00000019686 |                   | 0.428172756 | -1.223735092 | 0.015312383 | 0.031431205 |
| ENSDARG00000061835 | zpld1a            | 0.427943779 | -1.224506819 | 6.24E-08    | 2.40E-07    |
| ENSDARG00000076804 | ttyh1             | 0.427818339 | -1.224929766 | 6.52E-68    | 3.17E-66    |
| ENSDARG00000069748 | capn5b            | 0.427759827 | -1.225127097 | 8.55E-07    | 2.99E-06    |
| ENSDARG00000061644 | ensab             | 0.427722468 | -1.225253102 | 2.31E-29    | 3.06E-28    |
| ENSDARG00000076218 | b3galt4           | 0.427425229 | -1.226256027 | 9.17E-08    | 3.49E-07    |
| ENSDARG00000077606 | ARSI (2 of 2)     | 0.427412701 | -1.226298316 | 1.44E-13    | 8.43E-13    |
| ENSDARG00000079153 | CABZ01066573.1    | 0.427354173 | -1.226495885 | 1.20E-06    | 4.11E-06    |
| ENSDARG00000043609 | epor              | 0.427327918 | -1.22658452  | 4.46E-07    | 1.60E-06    |
| ENSDARG00000055589 | s100t             | 0.427104121 | -1.227340277 | 8.36E-48    | 2.30E-46    |
| ENSDARG00000033426 |                   | 0.427079159 | -1.227424598 | 5.14E-08    | 2.00E-07    |
| ENSDARG00000063475 | abcg1             | 0.427065505 | -1.227470723 | 3.29E-10    | 1.53E-09    |
| ENSDARG00000044278 | synpr             | 0.427009164 | -1.227661062 | 3.02E-08    | 1.20E-07    |
| ENSDARG00000025595 | agmo              | 0.426970393 | -1.22779206  | 1.91E-13    | 1.11E-12    |
| ENSDARG00000017780 | rorcb             | 0.426953321 | -1.227849746 | 4.12E-31    | 5.90E-30    |
| ENSDARG00000077162 | AL935029.1        | 0.42689303  | -1.228053488 | 8.42E-64    | 3.65E-62    |

|                    |                     |             |              |             |             |
|--------------------|---------------------|-------------|--------------|-------------|-------------|
| ENSDARG00000045685 | cntn1b              | 0.426876611 | -1.228108976 | 4.58E-49    | 1.31E-47    |
| ENSDARG00000070960 | si:ch211-288g17.4   | 0.426798526 | -1.2283729   | 0.024130523 | 0.047500384 |
| ENSDARG00000007869 | ehd3                | 0.426719601 | -1.228639715 | 1.98E-44    | 4.91E-43    |
| ENSDARG00000074419 | hcn4l               | 0.42668889  | -1.228743548 | 2.28E-08    | 9.18E-08    |
| ENSDARG00000033411 | cabp1b              | 0.426611587 | -1.229004945 | 0.024118214 | 0.047479443 |
| ENSDARG00000078339 | CT573264.3          | 0.426420861 | -1.229650077 | 0.005829485 | 0.012876564 |
| ENSDARG00000088810 | prox1b              | 0.426392197 | -1.229747058 | 1.15E-34    | 1.90E-33    |
| ENSDARG00000060350 | APOD (3 of 3)       | 0.426151801 | -1.230560667 | 2.29E-20    | 2.02E-19    |
| ENSDARG00000032098 | c8g                 | 0.426004491 | -1.231059455 | 1.07E-32    | 1.63E-31    |
| ENSDARG00000090275 | CDHR5 (2 of 2)      | 0.425883204 | -1.23147026  | 5.76E-05    | 0.000166821 |
| ENSDARG00000015404 | arl3l2              | 0.425780474 | -1.231818304 | 3.20E-10    | 1.49E-09    |
| ENSDARG00000091659 | LPL (2 of 2)        | 0.425776986 | -1.231830122 | 7.36E-30    | 9.99E-29    |
| ENSDARG00000096834 | si:ch211-155k24.9   | 0.425735623 | -1.231970285 | 6.55E-22    | 6.21E-21    |
| ENSDARG00000020866 | APOA4 (1 of 4)      | 0.425650291 | -1.23225948  | 8.90E-53    | 2.88E-51    |
| ENSDARG00000084796 | 5S_rRNA             | 0.425549995 | -1.232599459 | 0.003723119 | 0.008465508 |
| ENSDARG00000028118 | dscamb              | 0.425503861 | -1.232755873 | 3.99E-70    | 2.04E-68    |
| ENSDARG00000027070 | acbd4               | 0.425491647 | -1.232797286 | 6.12E-05    | 0.000176762 |
| ENSDARG00000059026 | zgc:123217          | 0.425478808 | -1.232840818 | 1.10E-07    | 4.17E-07    |
| ENSDARG00000091264 | FRMPD1 (4 of 5)     | 0.425457872 | -1.232911807 | 3.75E-05    | 0.000110954 |
| ENSDARG00000087426 | C1H20orf27 (2 of 2) | 0.425356952 | -1.233254062 | 8.15E-24    | 8.51E-23    |
| ENSDARG00000024017 | mamdc1              | 0.425237434 | -1.233659491 | 7.91E-33    | 1.22E-31    |
| ENSDARG00000079102 | PRRG3               | 0.425181028 | -1.233850871 | 1.11E-06    | 3.84E-06    |
| ENSDARG00000094124 | si:dkey-259n11.3    | 0.425176289 | -1.233866951 | 0.0064534   | 0.014152092 |
| ENSDARG00000089367 | PRRT2               | 0.42497659  | -1.234544722 | 1.53E-70    | 7.95E-69    |
| ENSDARG00000091444 | tubb4b              | 0.424897589 | -1.234812937 | 1.33E-09    | 5.92E-09    |
| ENSDARG00000079617 | zgc:101560          | 0.424877902 | -1.234879784 | 6.32E-06    | 2.03E-05    |
| ENSDARG00000020178 | nova1               | 0.424866127 | -1.234919768 | 4.74E-70    | 2.42E-68    |
| ENSDARG00000031465 | dgat1a              | 0.424864644 | -1.234924802 | 5.25E-23    | 5.29E-22    |
| ENSDARG00000031712 | grm3                | 0.424841291 | -1.235004103 | 2.41E-17    | 1.79E-16    |
| ENSDARG00000036944 | ensaa               | 0.424476284 | -1.236244146 | 1.47E-16    | 1.04E-15    |

|                    |                   |             |              |             |             |
|--------------------|-------------------|-------------|--------------|-------------|-------------|
| ENSDARG00000097492 | si:dkey-89b17.7   | 0.424449888 | -1.236333859 | 5.76E-25    | 6.34E-24    |
| ENSDARG00000077134 | gpr158a           | 0.424429395 | -1.236403519 | 2.92E-35    | 4.96E-34    |
| ENSDARG00000075712 | CTBP2             | 0.424281747 | -1.236905481 | 3.17E-15    | 2.07E-14    |
| ENSDARG00000079858 | tmem163a          | 0.424026826 | -1.237772556 | 7.67E-16    | 5.19E-15    |
| ENSDARG00000079945 | dfnb59            | 0.423815328 | -1.238492328 | 0.013931495 | 0.02881109  |
| ENSDARG00000013687 | cilp2             | 0.423766289 | -1.238659269 | 1.50E-49    | 4.38E-48    |
| ENSDARG00000019990 | cabp1a            | 0.423746013 | -1.2387283   | 1.02E-05    | 3.19E-05    |
| ENSDARG00000076431 | PPP1R9B (1 of 2)  | 0.423723909 | -1.238803557 | 4.26E-67    | 2.04E-65    |
| ENSDARG00000059832 | bai3              | 0.423681421 | -1.23894823  | 9.40E-66    | 4.31E-64    |
| ENSDARG00000086775 | top1              | 0.423629255 | -1.239125871 | 2.68E-08    | 1.07E-07    |
| ENSDARG00000008249 | ptchd4            | 0.423621775 | -1.239151348 | 5.98E-13    | 3.37E-12    |
| ENSDARG00000054036 | rnf34b            | 0.423603671 | -1.239213003 | 6.00E-06    | 1.93E-05    |
| ENSDARG00000053709 | CU694453.2        | 0.423158656 | -1.240729418 | 4.95E-17    | 3.62E-16    |
| ENSDARG00000043396 | fn dc4a           | 0.422933369 | -1.241497704 | 0.002740488 | 0.006358441 |
| ENSDARG00000020982 | PRICKLE2 (1 of 2) | 0.422666799 | -1.242407304 | 7.00E-25    | 7.68E-24    |
| ENSDARG00000001127 | slc17a6a          | 0.422567581 | -1.242746005 | 4.52E-57    | 1.66E-55    |
| ENSDARG00000060345 | apod              | 0.422378426 | -1.243391948 | 1.82E-52    | 5.80E-51    |
| ENSDARG00000077228 | ntrk3a            | 0.422267712 | -1.243770159 | 3.07E-11    | 1.54E-10    |
| ENSDARG00000074211 | si:dkeyp-72e1.7   | 0.422255064 | -1.243813369 | 3.92E-10    | 1.81E-09    |
| ENSDARG00000062165 | TUB               | 0.422184353 | -1.244054984 | 8.49E-47    | 2.26E-45    |
| ENSDARG00000090145 | TMEM240 (2 of 2)  | 0.422048079 | -1.244520737 | 1.87E-19    | 1.56E-18    |
| ENSDARG00000070694 | NXPH3             | 0.422029165 | -1.244585393 | 0.000135681 | 0.000375887 |
| ENSDARG00000041433 | si:dkey-7c18.24   | 0.421950035 | -1.244855923 | 6.22E-37    | 1.12E-35    |
| ENSDARG00000092801 | si:dkey-71b5.6    | 0.421879825 | -1.245095999 | 0.019920447 | 0.039935064 |
| ENSDARG00000062346 | cacna1r           | 0.421783773 | -1.245424501 | 2.18E-35    | 3.72E-34    |
| ENSDARG00000074443 | gas7a             | 0.421344486 | -1.246927849 | 8.07E-28    | 1.01E-26    |
| ENSDARG00000075978 | pcdh1gc5          | 0.421329374 | -1.246979595 | 1.49E-36    | 2.65E-35    |
| ENSDARG00000087745 | LRRC38 (2 of 2)   | 0.421321023 | -1.247008188 | 1.43E-06    | 4.89E-06    |
| ENSDARG00000079878 | si:ch73-387g8.1   | 0.421318908 | -1.247015433 | 1.53E-09    | 6.77E-09    |
| ENSDARG00000043746 | nrxn3a            | 0.420880688 | -1.24851678  | 1.23E-69    | 6.24E-68    |

|                    |                   |             |              |             |             |
|--------------------|-------------------|-------------|--------------|-------------|-------------|
| ENSDARG00000070045 | celf4             | 0.420880201 | -1.248518452 | 1.60E-64    | 7.06E-63    |
| ENSDARG00000079698 | asb13a.1          | 0.420838574 | -1.248661146 | 8.39E-12    | 4.37E-11    |
| ENSDARG00000045765 | asb13a.2          | 0.42078146  | -1.248856954 | 0.002245723 | 0.005270752 |
| ENSDARG00000097763 | si:dkey-286f11.2  | 0.420760816 | -1.248927738 | 4.04E-15    | 2.63E-14    |
| ENSDARG00000076691 | dlg2              | 0.420606419 | -1.249457228 | 2.89E-18    | 2.26E-17    |
| ENSDARG00000086762 | DFNA5 (2 of 2)    | 0.420595066 | -1.249496168 | 6.10E-16    | 4.15E-15    |
| ENSDARG00000016835 | tcirg1            | 0.420571177 | -1.249578115 | 1.35E-43    | 3.25E-42    |
| ENSDARG00000086990 | LRRC16B           | 0.420393075 | -1.250189189 | 5.96E-44    | 1.45E-42    |
| ENSDARG00000089269 | FP102887.1        | 0.420384497 | -1.25021863  | 0.002037857 | 0.004819111 |
| ENSDARG00000076959 | si:ch211-38m6.6   | 0.420174934 | -1.250937995 | 5.84E-07    | 2.07E-06    |
| ENSDARG00000033498 | rorb              | 0.42016741  | -1.250963829 | 3.95E-57    | 1.45E-55    |
| ENSDARG00000054002 | hn1a              | 0.419953    | -1.251700221 | 1.95E-16    | 1.37E-15    |
| ENSDARG00000063186 | BEND7             | 0.419912276 | -1.251840128 | 1.16E-05    | 3.61E-05    |
| ENSDARG00000089123 | si:dkey-79d12.2   | 0.419814423 | -1.252176362 | 8.11E-10    | 3.66E-09    |
| ENSDARG00000079873 | si:ch211-160d14.6 | 0.419690118 | -1.252603602 | 3.32E-16    | 2.29E-15    |
| ENSDARG00000097477 | si:dkey-4c2.11    | 0.419660405 | -1.252705742 | 0.014578846 | 0.0300427   |
| ENSDARG00000060459 | LRFN2 (1 of 2)    | 0.419551456 | -1.253080333 | 5.25E-12    | 2.77E-11    |
| ENSDARG00000012340 | ptpn11b           | 0.41942759  | -1.253506329 | 4.48E-32    | 6.65E-31    |
| ENSDARG00000062347 | mtus2             | 0.419350351 | -1.25377203  | 6.93E-69    | 3.43E-67    |
| ENSDARG00000086541 | CABZ01100278.1    | 0.419232392 | -1.254177902 | 1.29E-07    | 4.84E-07    |
| ENSDARG00000031463 | SYT6 (1 of 2)     | 0.419197741 | -1.254297154 | 2.00E-12    | 1.09E-11    |
| ENSDARG00000070625 | enpp5             | 0.419081855 | -1.254696037 | 9.47E-42    | 2.09E-40    |
| ENSDARG00000056450 | MANEAL            | 0.419075628 | -1.254717472 | 2.57E-55    | 9.05E-54    |
| ENSDARG00000077867 | CT573264.3        | 0.418932914 | -1.255208857 | 2.38E-05    | 7.18E-05    |
| ENSDARG00000023914 | mark4a            | 0.41884755  | -1.255502862 | 2.14E-39    | 4.31E-38    |
| ENSDARG00000045789 | srgap2b           | 0.418558173 | -1.256499948 | 3.21E-61    | 1.30E-59    |
| ENSDARG00000053480 | aqp9b             | 0.418296998 | -1.257400452 | 2.33E-08    | 9.38E-08    |
| ENSDARG00000070126 | si:dkey-22l11.6   | 0.418093289 | -1.258103207 | 0.000780682 | 0.001955352 |
| ENSDARG00000088952 | CU694197.1        | 0.417950127 | -1.258597296 | 1.35E-18    | 1.07E-17    |
| ENSDARG00000079491 | KCNA3             | 0.417916762 | -1.258712472 | 1.33E-33    | 2.11E-32    |

|                    |                  |             |              |             |             |
|--------------------|------------------|-------------|--------------|-------------|-------------|
| ENSDARG00000093604 | si:dkey-242k1.6  | 0.417893222 | -1.258793737 | 4.11E-16    | 2.82E-15    |
| ENSDARG00000014105 | apba1a           | 0.417854177 | -1.258928536 | 8.94E-28    | 1.11E-26    |
| ENSDARG00000058771 | NAV1 (1 of 3)    | 0.417497812 | -1.26015946  | 1.19E-35    | 2.05E-34    |
| ENSDARG00000070100 | BX511131.1       | 0.417432333 | -1.260385742 | 0.009330241 | 0.019890466 |
| ENSDARG00000018743 | scamp5a          | 0.417349561 | -1.260671841 | 4.28E-59    | 1.66E-57    |
| ENSDARG00000054026 | mustn1a          | 0.417180931 | -1.261254881 | 0.005356978 | 0.011896812 |
| ENSDARG00000089412 |                  | 0.417041143 | -1.261738375 | 1.09E-24    | 1.18E-23    |
| ENSDARG00000055132 | lrfn4a           | 0.416851458 | -1.262394713 | 9.36E-35    | 1.55E-33    |
| ENSDARG00000069867 |                  | 0.416756043 | -1.262724975 | 0.00889665  | 0.019024649 |
| ENSDARG00000067889 | gltpd2           | 0.416694984 | -1.262936363 | 5.46E-10    | 2.50E-09    |
| ENSDARG00000079455 | nlgm4a           | 0.416643257 | -1.263115462 | 4.29E-50    | 1.27E-48    |
| ENSDARG00000089298 |                  | 0.416609223 | -1.263233316 | 0.000255676 | 0.000681858 |
| ENSDARG00000023940 | si:ch73-362m14.4 | 0.416575907 | -1.263348693 | 4.41E-39    | 8.77E-38    |
| ENSDARG00000054253 | sobpa            | 0.416397847 | -1.263965487 | 2.23E-39    | 4.49E-38    |
| ENSDARG00000087669 | UNC13C (2 of 3)  | 0.416304374 | -1.264289378 | 5.11E-13    | 2.89E-12    |
| ENSDARG00000088342 | tmem145          | 0.416075784 | -1.26508177  | 2.58E-19    | 2.15E-18    |
| ENSDARG00000058015 | ano3             | 0.415920126 | -1.265621599 | 2.08E-12    | 1.12E-11    |
| ENSDARG00000075376 | SGSM1 (2 of 2)   | 0.415584231 | -1.266787183 | 1.16E-48    | 3.25E-47    |
| ENSDARG00000020212 | slc1a1           | 0.415522441 | -1.267001702 | 1.64E-45    | 4.18E-44    |
| ENSDARG00000074738 | pcdh2g9          | 0.415348162 | -1.267606923 | 8.43E-05    | 0.000239976 |
| ENSDARG00000090629 | tmtops3b         | 0.415138049 | -1.26833693  | 0.022077726 | 0.043845282 |
| ENSDARG00000055317 | C1QL4 (2 of 2)   | 0.414908151 | -1.269136095 | 6.29E-19    | 5.11E-18    |
| ENSDARG00000073755 | pcdh1g22         | 0.414773037 | -1.269605981 | 8.94E-20    | 7.62E-19    |
| ENSDARG00000062720 | pcdh1a           | 0.4147405   | -1.269719158 | 1.84E-72    | 9.99E-71    |
| ENSDARG00000061203 | trpc1            | 0.414519063 | -1.270489646 | 1.24E-34    | 2.04E-33    |
| ENSDARG00000074866 | ptpn5            | 0.414402319 | -1.270896019 | 3.99E-71    | 2.10E-69    |
| ENSDARG00000068624 | CLMN (2 of 3)    | 0.414400872 | -1.270901056 | 8.40E-50    | 2.46E-48    |
| ENSDARG00000057519 | CT737184.1       | 0.414360512 | -1.271041573 | 0.000474278 | 0.001222948 |
| ENSDARG00000074690 | ppm1j            | 0.414300031 | -1.271252168 | 1.27E-16    | 9.06E-16    |
| ENSDARG00000061832 | SNTG1            | 0.414239672 | -1.271462368 | 0.002283381 | 0.005353389 |

|                    |                  |             |              |             |             |
|--------------------|------------------|-------------|--------------|-------------|-------------|
| ENSDARG00000068745 | MAP4 (1 of 3)    | 0.414147271 | -1.271784211 | 5.79E-74    | 3.27E-72    |
| ENSDARG00000042677 | cadm1b           | 0.414126033 | -1.271858197 | 2.59E-13    | 1.49E-12    |
| ENSDARG00000077367 | ntng2a           | 0.414076136 | -1.272032035 | 3.42E-35    | 5.79E-34    |
| ENSDARG00000088064 | CABZ01064069.1   | 0.414044659 | -1.27214171  | 0.012113444 | 0.025355776 |
| ENSDARG00000046014 | kcna6            | 0.413958528 | -1.272441854 | 6.09E-08    | 2.35E-07    |
| ENSDARG00000033382 | grifin           | 0.413921215 | -1.272571901 | 8.17E-12    | 4.26E-11    |
| ENSDARG00000079791 | si:ch211-176g6.2 | 0.413864475 | -1.272769677 | 0.003981143 | 0.009011809 |
| ENSDARG00000095592 | si:dkey-11o15.5  | 0.413742322 | -1.273195555 | 0.000160765 | 0.000441036 |
| ENSDARG00000022132 | drp2             | 0.413638883 | -1.273556287 | 0.003244214 | 0.007452328 |
| ENSDARG00000054931 | PPP2R5B          | 0.413474858 | -1.274128488 | 2.65E-57    | 9.81E-56    |
| ENSDARG00000083588 | CABZ01039424.1   | 0.413379134 | -1.274462526 | 3.59E-05    | 0.000106455 |
| ENSDARG00000079847 | ENTHD1           | 0.413152724 | -1.275252916 | 5.97E-73    | 3.30E-71    |
| ENSDARG00000097804 | si:ch73-156o22.2 | 0.413100306 | -1.275435966 | 5.20E-31    | 7.41E-30    |
| ENSDARG00000074153 | slitrk5b         | 0.412978496 | -1.275861433 | 0.001506738 | 0.003627123 |
| ENSDARG00000079500 | kif3cb           | 0.412963564 | -1.275913598 | 6.32E-62    | 2.62E-60    |
| ENSDARG00000054137 | gpr126           | 0.412776342 | -1.276567807 | 7.33E-63    | 3.12E-61    |
| ENSDARG00000044447 | CDHR1 (2 of 2)   | 0.412763707 | -1.27661197  | 1.53E-17    | 1.15E-16    |
| ENSDARG00000088584 | si:ch73-352p18.4 | 0.412753751 | -1.276646768 | 0.001021227 | 0.002517887 |
| ENSDARG00000018773 |                  | 0.412631369 | -1.277074595 | 1.70E-22    | 1.67E-21    |
| ENSDARG00000088323 |                  | 0.412577868 | -1.277261661 | 3.36E-22    | 3.24E-21    |
| ENSDARG00000090880 | CABZ01074423.1   | 0.412444446 | -1.277728286 | 1.04E-06    | 3.61E-06    |
| ENSDARG00000053869 | ankrd55          | 0.41232615  | -1.278142135 | 9.53E-28    | 1.18E-26    |
| ENSDARG00000043122 | gpr88            | 0.412261822 | -1.278367229 | 3.42E-05    | 0.000101824 |
| ENSDARG00000045014 | tuba2            | 0.412209873 | -1.278549033 | 1.26E-42    | 2.89E-41    |
| ENSDARG00000025325 | CCSAP (1 of 2)   | 0.412168659 | -1.278693288 | 3.06E-53    | 1.01E-51    |
| ENSDARG00000075141 | gprc5bb          | 0.412139807 | -1.27879428  | 5.23E-07    | 1.87E-06    |
| ENSDARG00000070951 | hmga1b           | 0.412125782 | -1.278843376 | 1.52E-75    | 8.97E-74    |
| ENSDARG00000075159 | mfi2             | 0.412054219 | -1.279093913 | 2.16E-18    | 1.70E-17    |
| ENSDARG00000078241 | MAP7 (2 of 2)    | 0.412019354 | -1.279215988 | 9.84E-05    | 0.000277811 |
| ENSDARG00000091683 | cnrip1a          | 0.411933354 | -1.27951715  | 1.24E-71    | 6.61E-70    |

|                    |                    |             |              |             |             |
|--------------------|--------------------|-------------|--------------|-------------|-------------|
| ENSDARG00000091043 | pcdh2ab6           | 0.411927339 | -1.279538217 | 7.26E-08    | 2.78E-07    |
| ENSDARG00000024299 | c1qtnf4            | 0.411840192 | -1.279843463 | 4.07E-65    | 1.83E-63    |
| ENSDARG00000079264 | baiap3             | 0.411726054 | -1.280243349 | 6.95E-24    | 7.28E-23    |
| ENSDARG00000008398 | cacna1c            | 0.411528848 | -1.280934528 | 1.15E-46    | 3.05E-45    |
| ENSDARG00000062725 | unc5da             | 0.411522442 | -1.280956987 | 1.14E-12    | 6.28E-12    |
| ENSDARG00000077190 | HCN1               | 0.411078231 | -1.282515122 | 1.24E-10    | 5.96E-10    |
| ENSDARG00000078671 | cdk5r2b            | 0.410992336 | -1.282816605 | 5.16E-12    | 2.72E-11    |
| ENSDARG00000067964 | slc6a5             | 0.410922799 | -1.283060717 | 2.14E-32    | 3.24E-31    |
| ENSDARG00000095512 | rca2.2             | 0.410753008 | -1.283656954 | 0.005660245 | 0.012527227 |
| ENSDARG00000062840 | DTX1               | 0.41072245  | -1.283764287 | 0.000404444 | 0.001053103 |
| ENSDARG00000078366 | robo2              | 0.410659905 | -1.283983999 | 9.72E-35    | 1.61E-33    |
| ENSDARG00000016667 | gabbr1b            | 0.410223261 | -1.285518794 | 4.42E-48    | 1.22E-46    |
| ENSDARG00000027602 | mb21d2b            | 0.410193913 | -1.285622013 | 7.69E-35    | 1.28E-33    |
| ENSDARG00000070430 | chtopb             | 0.410134365 | -1.285831464 | 6.79E-06    | 2.17E-05    |
| ENSDARG00000094297 | NLRP6 (122 of 145) | 0.410114477 | -1.285901422 | 0.001236638 | 0.003011105 |
| ENSDARG00000079742 | MCF2L2             | 0.410107264 | -1.285926798 | 1.16E-30    | 1.62E-29    |
| ENSDARG00000091332 |                    | 0.410078622 | -1.286027559 | 0.016435726 | 0.033531147 |
| ENSDARG00000090696 | CABZ01068272.1     | 0.41000357  | -1.286291623 | 0.013349946 | 0.02769914  |
| ENSDARG00000007889 | csf1ra             | 0.409990298 | -1.286338326 | 1.03E-58    | 3.96E-57    |
| ENSDARG00000059134 | CABZ01087549.1     | 0.409868295 | -1.286767698 | 7.17E-20    | 6.15E-19    |
| ENSDARG00000044161 | grid1b             | 0.409798903 | -1.287011971 | 7.82E-13    | 4.36E-12    |
| ENSDARG00000015174 | atp6v0a1b          | 0.409716431 | -1.287302344 | 5.80E-75    | 3.38E-73    |
| ENSDARG00000087214 |                    | 0.409453164 | -1.288229659 | 0.000275088 | 0.000730815 |
| ENSDARG00000089742 | FAM161A            | 0.409300093 | -1.288769099 | 4.49E-12    | 2.38E-11    |
| ENSDARG00000089438 | FP236162.1         | 0.409248463 | -1.288951096 | 9.58E-25    | 1.04E-23    |
| ENSDARG00000019341 | gpc1a              | 0.409226316 | -1.289029173 | 2.09E-54    | 7.15E-53    |
| ENSDARG00000090170 | rab11fip4a         | 0.40917896  | -1.289196132 | 0.007313362 | 0.01587066  |
| ENSDARG00000061454 | nrxn2a             | 0.409098962 | -1.289478217 | 5.40E-76    | 3.26E-74    |
| ENSDARG00000034757 | zdhhc2             | 0.409089123 | -1.289512916 | 6.04E-13    | 3.39E-12    |
| ENSDARG00000089314 | mapta              | 0.409070489 | -1.289578633 | 3.33E-40    | 6.89E-39    |

|                    |                   |             |              |             |             |
|--------------------|-------------------|-------------|--------------|-------------|-------------|
| ENSDARG00000070495 | FRMD7 (2 of 2)    | 0.409032194 | -1.289713696 | 2.81E-05    | 8.41E-05    |
| ENSDARG00000058875 | pcdh2ac           | 0.40892266  | -1.290100085 | 2.22E-76    | 1.35E-74    |
| ENSDARG00000045760 | prmt8b            | 0.408880094 | -1.290250268 | 3.36E-17    | 2.48E-16    |
| ENSDARG00000056745 | necab2            | 0.408811056 | -1.29049388  | 2.57E-71    | 1.36E-69    |
| ENSDARG00000074821 | NLRP6 (12 of 145) | 0.408592642 | -1.291264869 | 0.017990458 | 0.036373934 |
| ENSDARG00000034215 | rab42a            | 0.40858114  | -1.291305484 | 1.06E-41    | 2.33E-40    |
| ENSDARG00000052905 | zgc:165423        | 0.408558449 | -1.291385609 | 1.15E-16    | 8.24E-16    |
| ENSDARG00000076376 | tmem175           | 0.408549155 | -1.291418428 | 9.64E-17    | 6.94E-16    |
| ENSDARG00000054836 | slc1a9            | 0.408052236 | -1.293174248 | 0.0002352   | 0.000630091 |
| ENSDARG00000079700 | si:dkey-276l13.6  | 0.408012707 | -1.293314011 | 3.37E-13    | 1.93E-12    |
| ENSDARG00000060330 | si:ch211-284e13.4 | 0.407952789 | -1.293525892 | 2.18E-37    | 4.01E-36    |
| ENSDARG00000062687 | KCNH7 (1 of 2)    | 0.407794785 | -1.294084767 | 2.79E-39    | 5.59E-38    |
| ENSDARG00000030265 | scdb              | 0.407727376 | -1.294323267 | 1.90E-58    | 7.23E-57    |
| ENSDARG00000015530 | si:dkey-169l5.3   | 0.407605477 | -1.294754659 | 7.94E-24    | 8.30E-23    |
| ENSDARG00000078141 | ELFN1 (2 of 2)    | 0.407567741 | -1.294888228 | 1.01E-24    | 1.10E-23    |
| ENSDARG00000060237 | kcnma1b           | 0.407517174 | -1.295067234 | 0.000329679 | 0.000867973 |
| ENSDARG00000033140 | desi1a            | 0.407484706 | -1.295182182 | 5.38E-64    | 2.34E-62    |
| ENSDARG00000094577 | CDC42SE2          | 0.407474393 | -1.295218697 | 4.76E-36    | 8.33E-35    |
| ENSDARG00000043864 | nptnb             | 0.4074301   | -1.295375528 | 4.98E-59    | 1.93E-57    |
| ENSDARG00000003998 | phyhipla          | 0.407342548 | -1.295685581 | 1.93E-22    | 1.89E-21    |
| ENSDARG00000045156 | rgs9b             | 0.407130192 | -1.29643788  | 5.68E-26    | 6.56E-25    |
| ENSDARG00000041033 | or119-2           | 0.406792083 | -1.297636493 | 0.002689226 | 0.006245115 |
| ENSDARG00000059751 | BX511065.1        | 0.406767446 | -1.29772387  | 1.83E-24    | 1.97E-23    |
| ENSDARG00000060269 | WSCD1 (1 of 3)    | 0.406748175 | -1.297792222 | 5.88E-06    | 1.89E-05    |
| ENSDARG00000079412 | frt02             | 0.406674083 | -1.298055041 | 3.57E-10    | 1.65E-09    |
| ENSDARG00000079986 | si:ch211-250k18.8 | 0.406279708 | -1.299454787 | 0.008082986 | 0.017409177 |
| ENSDARG00000055644 | zgc:101788        | 0.406198423 | -1.299743455 | 6.13E-11    | 3.00E-10    |
| ENSDARG00000068716 | cuedc1a           | 0.406094651 | -1.30011207  | 1.26E-46    | 3.32E-45    |
| ENSDARG00000075858 | fam155a           | 0.406018029 | -1.300384302 | 1.41E-08    | 5.79E-08    |
| ENSDARG00000091130 | KCNQ2 (2 of 2)    | 0.405723279 | -1.301432015 | 7.05E-36    | 1.23E-34    |



|                    |                   |             |              |             |             |
|--------------------|-------------------|-------------|--------------|-------------|-------------|
| ENSDARG00000044387 | cldn2             | 0.405710815 | -1.301476336 | 2.44E-08    | 9.77E-08    |
| ENSDARG00000034522 | rab6ba            | 0.405524701 | -1.302138303 | 1.57E-64    | 6.95E-63    |
| ENSDARG00000017429 | sphkap            | 0.40532867  | -1.30283587  | 3.94E-50    | 1.17E-48    |
| ENSDARG00000043448 | itm2ca            | 0.405309482 | -1.302904169 | 1.38E-77    | 8.60E-76    |
| ENSDARG00000051712 | si:ch211-147g22.2 | 0.405267749 | -1.303052725 | 0.000192086 | 0.000520777 |
| ENSDARG00000003991 | fhl2b             | 0.405056033 | -1.3038066   | 1.20E-29    | 1.62E-28    |
| ENSDARG00000032039 | mxd1              | 0.405038172 | -1.303870218 | 2.40E-37    | 4.41E-36    |
| ENSDARG00000085981 | 5S_rRNA           | 0.404726378 | -1.304981216 | 5.90E-05    | 0.000170776 |
| ENSDARG00000079119 | si:ch211-229d2.5  | 0.40442735  | -1.306047529 | 9.88E-43    | 2.29E-41    |
| ENSDARG00000007151 | kcnk2b            | 0.404399433 | -1.306147122 | 1.06E-12    | 5.88E-12    |
| ENSDARG00000078744 | tmem63bb          | 0.404273384 | -1.306596869 | 1.82E-12    | 9.88E-12    |
| ENSDARG00000060400 | si:ch73-362m14.3  | 0.404052989 | -1.307383588 | 3.53E-05    | 0.000104868 |
| ENSDARG00000068323 | astn1             | 0.403988284 | -1.30761464  | 1.04E-75    | 6.21E-74    |
| ENSDARG00000045275 | klhl14            | 0.40392551  | -1.307838831 | 4.15E-40    | 8.56E-39    |
| ENSDARG00000033544 | adamts15b         | 0.403818211 | -1.308222122 | 4.52E-33    | 6.99E-32    |
| ENSDARG00000088023 | si:dkey-26c10.5   | 0.403735772 | -1.308516675 | 1.44E-08    | 5.89E-08    |
| ENSDARG00000038367 | cyp2k19           | 0.403674328 | -1.308736256 | 4.85E-10    | 2.23E-09    |
| ENSDARG00000091912 | NLRP6 (97 of 145) | 0.403636082 | -1.308872948 | 0.013403232 | 0.02780361  |
| ENSDARG00000014746 | rbfox1            | 0.403605316 | -1.308982916 | 7.11E-67    | 3.38E-65    |
| ENSDARG00000076351 | brinp3a           | 0.403569414 | -1.309111258 | 5.31E-44    | 1.30E-42    |
| ENSDARG00000031600 | rd3               | 0.403541043 | -1.309212682 | 3.75E-44    | 9.21E-43    |
| ENSDARG00000086231 | PCDHGC5 (7 of 31) | 0.403523022 | -1.30927711  | 0.000277559 | 0.000736762 |
| ENSDARG00000069171 | gramd4            | 0.403418505 | -1.309650831 | 5.02E-08    | 1.95E-07    |
| ENSDARG00000015240 | cdkl5             | 0.403363013 | -1.309849296 | 1.89E-45    | 4.83E-44    |
| ENSDARG00000068138 | ch25hl1.2         | 0.403104513 | -1.310774161 | 0.002831406 | 0.006556539 |
| ENSDARG00000078247 | vip               | 0.40309166  | -1.31082016  | 2.36E-09    | 1.02E-08    |
| ENSDARG00000029989 | adcyp1r1a         | 0.402945841 | -1.311342154 | 2.53E-78    | 1.61E-76    |
| ENSDARG00000012482 | pclob             | 0.402913455 | -1.31145811  | 1.10E-66    | 5.21E-65    |
| ENSDARG00000079665 | GPR158 (2 of 2)   | 0.402912812 | -1.311460413 | 1.03E-20    | 9.24E-20    |
| ENSDARG00000056244 |                   | 0.402881368 | -1.311573007 | 1.14E-29    | 1.54E-28    |

|                    |                  |             |              |             |             |
|--------------------|------------------|-------------|--------------|-------------|-------------|
| ENSDARG00000053220 |                  | 0.402865047 | -1.311631453 | 4.11E-55    | 1.44E-53    |
| ENSDARG00000030078 | gliplr1b         | 0.402559406 | -1.312726395 | 5.24E-21    | 4.77E-20    |
| ENSDARG00000089130 | CABZ01084618.1   | 0.402236416 | -1.313884396 | 6.16E-11    | 3.02E-10    |
| ENSDARG00000088593 | chst1            | 0.402046869 | -1.314564402 | 8.97E-50    | 2.62E-48    |
| ENSDARG00000088735 | RAP1GAP (3 of 3) | 0.401928626 | -1.314988765 | 0.002934251 | 0.006779773 |
| ENSDARG00000090642 | si:dkey-54n8.4   | 0.401790972 | -1.315482948 | 9.92E-29    | 1.28E-27    |
| ENSDARG00000061718 | znf704           | 0.40177558  | -1.315538216 | 2.16E-21    | 2.00E-20    |
| ENSDARG00000090064 | CABZ01084273.1   | 0.401715246 | -1.31575488  | 4.00E-22    | 3.83E-21    |
| ENSDARG00000062293 | qpctlb           | 0.40120815  | -1.317577181 | 0.007795291 | 0.016835482 |
| ENSDARG00000068245 | asic1c           | 0.400868702 | -1.318798313 | 3.29E-07    | 1.20E-06    |
| ENSDARG00000045145 | shisa9a          | 0.400755042 | -1.319207423 | 4.22E-16    | 2.90E-15    |
| ENSDARG00000074320 | KCNAB3           | 0.400601336 | -1.319760861 | 4.21E-07    | 1.52E-06    |
| ENSDARG00000071048 | wisp3            | 0.400560523 | -1.319907851 | 1.14E-26    | 1.36E-25    |
| ENSDARG00000033508 | CR396586.1       | 0.400475789 | -1.32021307  | 0.002199105 | 0.005169025 |
| ENSDARG00000004861 | esrrga           | 0.400296921 | -1.320857576 | 5.18E-79    | 3.35E-77    |
| ENSDARG00000028628 | gdap1l1          | 0.399986892 | -1.321975374 | 1.69E-18    | 1.34E-17    |
| ENSDARG00000074563 | GPR37 (2 of 2)   | 0.399892121 | -1.32231724  | 7.88E-26    | 9.02E-25    |
| ENSDARG00000042940 | nab1a            | 0.399830433 | -1.322539809 | 2.67E-17    | 1.98E-16    |
| ENSDARG00000095915 | col6a3           | 0.399681365 | -1.323077785 | 3.89E-73    | 2.17E-71    |
| ENSDARG00000025847 | sox12            | 0.399628951 | -1.323266992 | 2.59E-79    | 1.70E-77    |
| ENSDARG00000040982 | fgf14            | 0.399624926 | -1.323281524 | 2.82E-25    | 3.14E-24    |
| ENSDARG00000091094 | CABZ01111604.1   | 0.399605488 | -1.3233517   | 6.33E-11    | 3.10E-10    |
| ENSDARG00000052242 | aff2             | 0.399469979 | -1.323841008 | 2.60E-62    | 1.09E-60    |
| ENSDARG00000053771 | APBB3            | 0.399404449 | -1.324077693 | 1.73E-26    | 2.04E-25    |
| ENSDARG00000062024 | kif1ab           | 0.399397931 | -1.324101236 | 3.13E-79    | 2.05E-77    |
| ENSDARG00000006923 | cacna1ab         | 0.399397749 | -1.324101891 | 4.35E-41    | 9.32E-40    |
| ENSDARG00000087981 | CABZ01088330.1   | 0.398811168 | -1.326222285 | 4.12E-71    | 2.17E-69    |
| ENSDARG00000063056 | tulp4b           | 0.398644448 | -1.326825518 | 8.62E-57    | 3.13E-55    |
| ENSDARG00000062236 | ndrg4            | 0.398318484 | -1.328005666 | 2.83E-49    | 8.17E-48    |
| ENSDARG00000042794 | CABZ01079045.1   | 0.398202793 | -1.328424753 | 6.41E-08    | 2.47E-07    |

|                    |                   |             |              |             |             |
|--------------------|-------------------|-------------|--------------|-------------|-------------|
| ENSDARG00000035899 | lingo1b           | 0.398161971 | -1.328572661 | 1.21E-45    | 3.10E-44    |
| ENSDARG00000079161 | BSN (1 of 3)      | 0.398099381 | -1.328799467 | 1.60E-79    | 1.06E-77    |
| ENSDARG00000055792 | FOXO4             | 0.398063931 | -1.328927943 | 5.76E-73    | 3.20E-71    |
| ENSDARG00000036383 | si:ch73-335m24.5  | 0.397637497 | -1.330474287 | 3.31E-32    | 4.95E-31    |
| ENSDARG00000020718 | SLC25A22 (1 of 2) | 0.397599607 | -1.330611764 | 4.42E-39    | 8.78E-38    |
| ENSDARG00000075924 | RAPGEF4           | 0.39739174  | -1.331366209 | 2.35E-34    | 3.84E-33    |
| ENSDARG00000074073 | MAP6 (1 of 2)     | 0.397090041 | -1.332461918 | 1.01E-44    | 2.53E-43    |
| ENSDARG00000097648 | C15H11orf87       | 0.396987949 | -1.332832881 | 3.99E-66    | 1.86E-64    |
| ENSDARG00000009081 | sh2d3cb           | 0.39677978  | -1.333589586 | 6.14E-08    | 2.37E-07    |
| ENSDARG00000055672 | map3k10           | 0.396740771 | -1.333731432 | 3.22E-30    | 4.43E-29    |
| ENSDARG00000004141 | zgc:92630         | 0.396633202 | -1.334122646 | 1.08E-15    | 7.28E-15    |
| ENSDARG00000023600 | sh3gl2            | 0.396255535 | -1.335497008 | 1.57E-73    | 8.80E-72    |
| ENSDARG00000078536 | MEGF9 (2 of 2)    | 0.396111754 | -1.336020583 | 5.72E-30    | 7.81E-29    |
| ENSDARG00000032959 | kcnc1b            | 0.395980749 | -1.336497802 | 2.01E-35    | 3.45E-34    |
| ENSDARG00000033556 | PCDH11Y           | 0.395855915 | -1.336952687 | 7.82E-76    | 4.69E-74    |
| ENSDARG00000056163 | zgc:73228         | 0.395791375 | -1.337187923 | 1.85E-16    | 1.30E-15    |
| ENSDARG00000089771 | KCTD5             | 0.39567596  | -1.337608681 | 2.89E-26    | 3.38E-25    |
| ENSDARG00000052558 | porcn             | 0.395615449 | -1.33782933  | 8.33E-50    | 2.44E-48    |
| ENSDARG00000036446 | PRKAR2B           | 0.395365129 | -1.338742462 | 1.26E-43    | 3.02E-42    |
| ENSDARG00000059960 | plch2a            | 0.395347733 | -1.338805945 | 4.92E-77    | 3.02E-75    |
| ENSDARG00000068083 | RAB37             | 0.395229868 | -1.339236117 | 1.73E-05    | 5.29E-05    |
| ENSDARG00000002898 | DGKA (1 of 2)     | 0.395178867 | -1.339422296 | 9.67E-08    | 3.67E-07    |
| ENSDARG00000088739 | si:ch211-235m3.9  | 0.39509813  | -1.339717076 | 0.008154632 | 0.017550186 |
| ENSDARG00000086790 | gucy1b3           | 0.395062799 | -1.339846093 | 1.52E-38    | 2.95E-37    |
| ENSDARG00000076697 | SIPA1             | 0.394973999 | -1.340170411 | 2.00E-57    | 7.41E-56    |
| ENSDARG00000089193 | si:ch211-287i21.1 | 0.394929591 | -1.340332626 | 1.62E-32    | 2.45E-31    |
| ENSDARG00000090760 | FAM160A1 (2 of 2) | 0.394913319 | -1.340392071 | 1.33E-25    | 1.50E-24    |
| ENSDARG00000073883 | clstn3            | 0.394897015 | -1.340451634 | 1.76E-76    | 1.07E-74    |
| ENSDARG00000077428 | camta1a           | 0.394804769 | -1.340788679 | 4.49E-78    | 2.84E-76    |
| ENSDARG00000006383 | stxbp5l           | 0.394704016 | -1.341156897 | 9.74E-45    | 2.44E-43    |

|                    |                   |             |              |             |             |
|--------------------|-------------------|-------------|--------------|-------------|-------------|
| ENSDARG00000076790 | crygm2d16         | 0.394646949 | -1.3413655   | 3.04E-81    | 2.08E-79    |
| ENSDARG00000036952 | XKR7 (2 of 2)     | 0.394642078 | -1.341383305 | 8.84E-23    | 8.79E-22    |
| ENSDARG00000037390 | gsg1l             | 0.394573165 | -1.341635253 | 0.00010142  | 0.000285838 |
| ENSDARG00000037498 | gria3b            | 0.394477539 | -1.341984938 | 4.05E-46    | 1.05E-44    |
| ENSDARG00000032199 | gpc3              | 0.394462096 | -1.342041418 | 2.07E-07    | 7.69E-07    |
| ENSDARG00000045639 | elavl4            | 0.394442728 | -1.342112255 | 1.91E-57    | 7.08E-56    |
| ENSDARG00000043553 | ches1             | 0.394435714 | -1.342137907 | 3.36E-17    | 2.47E-16    |
| ENSDARG00000073920 | cntnap5a          | 0.394002782 | -1.34372228  | 1.27E-32    | 1.93E-31    |
| ENSDARG00000010433 | ARHGAP44 (1 of 2) | 0.39399702  | -1.343743377 | 1.54E-18    | 1.22E-17    |
| ENSDARG00000084627 | 5S_rRNA           | 0.393734661 | -1.344704375 | 0.008568405 | 0.018373893 |
| ENSDARG00000052910 | wnt8a             | 0.393302645 | -1.346288205 | 0.019031046 | 0.038284417 |
| ENSDARG00000073699 | COL9A1 (2 of 2)   | 0.393249944 | -1.346481535 | 8.42E-41    | 1.78E-39    |
| ENSDARG00000006747 | tmem178b          | 0.392962624 | -1.347535995 | 7.82E-17    | 5.66E-16    |
| ENSDARG00000079671 | lppr4a            | 0.392939529 | -1.347620788 | 1.13E-33    | 1.80E-32    |
| ENSDARG00000075154 | B3GALT1           | 0.39281062  | -1.348094161 | 1.15E-08    | 4.74E-08    |
| ENSDARG00000093411 | gad1a             | 0.392709249 | -1.348466519 | 4.19E-16    | 2.88E-15    |
| ENSDARG00000057155 | XRG5              | 0.392676913 | -1.348585316 | 4.68E-09    | 1.99E-08    |
| ENSDARG00000086716 | NXPH4             | 0.392652926 | -1.348673447 | 0.000360973 | 0.000946417 |
| ENSDARG00000076640 | NFATC2 (1 of 2)   | 0.392547127 | -1.349062229 | 2.27E-09    | 9.85E-09    |
| ENSDARG00000041627 | sncb              | 0.392512632 | -1.34918901  | 1.76E-51    | 5.45E-50    |
| ENSDARG00000058222 | mpp4a             | 0.392289531 | -1.350009259 | 1.01E-09    | 4.52E-09    |
| ENSDARG00000075133 | BAI1 (1 of 3)     | 0.392196033 | -1.350353154 | 7.09E-30    | 9.63E-29    |
| ENSDARG00000031537 | wu:fl09a04        | 0.391988745 | -1.351115864 | 8.50E-10    | 3.84E-09    |
| ENSDARG00000090930 | si:ch211-120g10.1 | 0.391899877 | -1.351442975 | 1.14E-11    | 5.91E-11    |
| ENSDARG00000093359 | inpp5jb           | 0.391736583 | -1.352044232 | 3.19E-12    | 1.71E-11    |
| ENSDARG00000089883 | si:dkey-210j14.3  | 0.391611347 | -1.352505528 | 7.58E-17    | 5.49E-16    |
| ENSDARG00000060939 | KIRREL3 (1 of 3)  | 0.391595946 | -1.352562267 | 4.44E-20    | 3.84E-19    |
| ENSDARG00000012388 | CU855779.1        | 0.391519948 | -1.35284228  | 1.34E-26    | 1.59E-25    |
| ENSDARG00000093089 | tac3a             | 0.391102077 | -1.354382896 | 0.000177325 | 0.0004832   |
| ENSDARG00000087010 | ATG2A             | 0.390955743 | -1.354922794 | 5.15E-08    | 2.00E-07    |

|                    |                   |             |              |             |             |
|--------------------|-------------------|-------------|--------------|-------------|-------------|
| ENSDARG00000089486 | cplx3b            | 0.390955513 | -1.354923644 | 3.57E-11    | 1.78E-10    |
| ENSDARG00000009941 | erc1a             | 0.39075687  | -1.355656859 | 4.88E-53    | 1.59E-51    |
| ENSDARG00000074724 |                   | 0.390607303 | -1.356209173 | 7.56E-05    | 0.000216533 |
| ENSDARG00000030791 | maf3b             | 0.390574031 | -1.356332067 | 2.01E-32    | 3.04E-31    |
| ENSDARG00000027360 | si:ch211-106h11.3 | 0.390516567 | -1.35654434  | 1.62E-52    | 5.19E-51    |
| ENSDARG00000008186 | syk               | 0.390450002 | -1.356790277 | 3.55E-23    | 3.61E-22    |
| ENSDARG00000069994 | elna              | 0.390289529 | -1.357383337 | 5.23E-30    | 7.15E-29    |
| ENSDARG00000077888 | slain1b           | 0.390252162 | -1.357521469 | 6.33E-10    | 2.88E-09    |
| ENSDARG00000077652 | LRAT              | 0.390235593 | -1.357582723 | 5.20E-06    | 1.68E-05    |
| ENSDARG00000075694 | adora1            | 0.390222222 | -1.357632159 | 3.75E-15    | 2.44E-14    |
| ENSDARG00000089082 | CU041398.1        | 0.389881716 | -1.358891596 | 2.02E-39    | 4.08E-38    |
| ENSDARG00000056047 | noxa1             | 0.389822666 | -1.359110118 | 0.0002015   | 0.000544695 |
| ENSDARG00000096261 | CELF6             | 0.389817684 | -1.359128557 | 0.006993715 | 0.015240161 |
| ENSDARG00000076309 | mxra5b            | 0.389692109 | -1.359593375 | 1.99E-55    | 7.05E-54    |
| ENSDARG00000075043 | GPRIN3            | 0.389103045 | -1.361775824 | 1.41E-54    | 4.86E-53    |
| ENSDARG00000014053 | olfm1b            | 0.389027596 | -1.362055598 | 4.86E-84    | 3.52E-82    |
| ENSDARG00000093091 | iqsec3b           | 0.388986763 | -1.362207033 | 1.79E-08    | 7.24E-08    |
| ENSDARG00000090963 | ATP6AP1L (1 of 2) | 0.388774992 | -1.362992675 | 7.55E-44    | 1.84E-42    |
| ENSDARG00000013491 | map3k9            | 0.388750655 | -1.363082989 | 3.40E-29    | 4.49E-28    |
| ENSDARG00000097374 | si:dkey-108k21.7  | 0.388672191 | -1.363374208 | 6.61E-07    | 2.34E-06    |
| ENSDARG00000096508 | si:ch211-265g21.1 | 0.388411562 | -1.364341949 | 1.01E-42    | 2.34E-41    |
| ENSDARG00000057408 | CABZ01067232.1    | 0.388376965 | -1.364470457 | 3.42E-29    | 4.51E-28    |
| ENSDARG00000026137 | sfxn5b            | 0.388171007 | -1.365235731 | 1.27E-65    | 5.77E-64    |
| ENSDARG00000075281 | tbc1d30           | 0.388157768 | -1.365284935 | 6.94E-62    | 2.88E-60    |
| ENSDARG00000071892 | CU915772.1        | 0.388157588 | -1.365285603 | 4.05E-05    | 0.00011931  |
| ENSDARG00000058357 | ankrd33ba         | 0.388095695 | -1.365515664 | 6.21E-13    | 3.49E-12    |
| ENSDARG00000061497 | THSD7B (1 of 2)   | 0.388017341 | -1.365806965 | 1.25E-09    | 5.56E-09    |
| ENSDARG00000062420 | nfia              | 0.387715183 | -1.366930863 | 7.16E-85    | 5.26E-83    |
| ENSDARG00000005453 | foxp2             | 0.387618358 | -1.367291197 | 7.39E-83    | 5.24E-81    |
| ENSDARG00000097226 | pde4ba            | 0.3875886   | -1.367401955 | 0.001475557 | 0.003555677 |

|                    |                     |             |              |             |             |
|--------------------|---------------------|-------------|--------------|-------------|-------------|
| ENSDARG00000086049 | FAM196B             | 0.387563618 | -1.367494947 | 0.005231777 | 0.011635135 |
| ENSDARG00000068421 | ttc9b               | 0.387530499 | -1.367618239 | 6.18E-31    | 8.79E-30    |
| ENSDARG00000091509 | ATP6AP1L (2 of 2)   | 0.387368949 | -1.368219779 | 4.21E-20    | 3.65E-19    |
| ENSDARG00000022971 | epha6               | 0.386971894 | -1.36969931  | 5.28E-36    | 9.24E-35    |
| ENSDARG00000062849 | kcnk10a             | 0.386623693 | -1.370998042 | 1.01E-09    | 4.52E-09    |
| ENSDARG00000071889 | pcdh2g8             | 0.386556251 | -1.371249726 | 2.67E-05    | 8.03E-05    |
| ENSDARG00000057056 | si:dkey-202l22.3    | 0.386410719 | -1.371792981 | 0.00092513  | 0.002292293 |
| ENSDARG00000013615 | pbx3b               | 0.386360829 | -1.371979259 | 8.77E-82    | 6.08E-80    |
| ENSDARG00000069139 | grik1a              | 0.386324424 | -1.372115207 | 2.75E-14    | 1.70E-13    |
| ENSDARG00000055852 | MTNR1A (2 of 2)     | 0.386125954 | -1.372856566 | 0.00527226  | 0.011717828 |
| ENSDARG00000032799 | kcnd2               | 0.386108118 | -1.372923208 | 2.63E-33    | 4.11E-32    |
| ENSDARG00000062122 | klhl5               | 0.386046387 | -1.373153883 | 1.08E-15    | 7.24E-15    |
| ENSDARG00000035655 | rad21b              | 0.385965287 | -1.373456996 | 7.44E-62    | 3.07E-60    |
| ENSDARG00000037682 | BX005294.1          | 0.385946142 | -1.373528557 | 2.69E-10    | 1.26E-09    |
| ENSDARG00000021241 | zgc:165604          | 0.385893084 | -1.373726906 | 3.14E-07    | 1.14E-06    |
| ENSDARG00000077189 | INTS5 (1 of 2)      | 0.385600025 | -1.374822949 | 9.93E-07    | 3.45E-06    |
| ENSDARG00000040535 | CSGALNACT1 (1 of 2) | 0.385578281 | -1.374904305 | 1.11E-55    | 3.95E-54    |
| ENSDARG00000054288 | zgc:63972           | 0.385391975 | -1.375601565 | 9.15E-13    | 5.08E-12    |
| ENSDARG00000069767 | pvr1a               | 0.385219917 | -1.376245797 | 8.47E-12    | 4.41E-11    |
| ENSDARG00000031640 | si:dkey-109j17.5    | 0.385160829 | -1.376467108 | 1.98E-08    | 8.00E-08    |
| ENSDARG00000052775 | opn3                | 0.385081221 | -1.376765326 | 1.06E-05    | 3.33E-05    |
| ENSDARG00000037660 | TRPC7 (2 of 3)      | 0.385010248 | -1.377031246 | 8.34E-05    | 0.000237551 |
| ENSDARG00000012367 | TRIM46 (1 of 2)     | 0.3849089   | -1.377411064 | 5.89E-43    | 1.38E-41    |
| ENSDARG00000094512 |                     | 0.38483374  | -1.377692803 | 3.64E-07    | 1.32E-06    |
| ENSDARG00000092174 | si:ch211-59d15.4    | 0.384771532 | -1.377926033 | 0.002463036 | 0.005748501 |
| ENSDARG00000022518 | pex5la              | 0.384607104 | -1.378542686 | 4.13E-11    | 2.05E-10    |
| ENSDARG00000012667 | tfap2b              | 0.384593618 | -1.378593271 | 2.02E-84    | 1.47E-82    |
| ENSDARG00000070810 | cck                 | 0.384183773 | -1.380131512 | 4.33E-07    | 1.56E-06    |
| ENSDARG00000079899 | FAM135B             | 0.384050597 | -1.380631703 | 4.41E-13    | 2.50E-12    |
| ENSDARG00000055463 | Irit3a              | 0.383953722 | -1.38099566  | 7.33E-05    | 0.000210066 |

|                    |                   |             |              |             |             |
|--------------------|-------------------|-------------|--------------|-------------|-------------|
| ENSDARG00000022817 | pvalb3            | 0.383889258 | -1.381237902 | 1.82E-53    | 6.02E-52    |
| ENSDARG00000094256 | si:dkey-46m10.2   | 0.383818863 | -1.381502478 | 0.001608307 | 0.003857248 |
| ENSDARG00000040246 | rap2ab            | 0.383271094 | -1.383562899 | 1.60E-10    | 7.60E-10    |
| ENSDARG00000062477 | kiaa1549la        | 0.383159916 | -1.383981452 | 1.02E-78    | 6.53E-77    |
| ENSDARG00000045353 |                   | 0.382993349 | -1.384608757 | 6.64E-06    | 2.12E-05    |
| ENSDARG00000089297 | CR847851.8        | 0.382975875 | -1.384674578 | 1.70E-06    | 5.77E-06    |
| ENSDARG00000086485 | PCDHGC5 (9 of 31) | 0.382416066 | -1.38678496  | 0.000255362 | 0.000681084 |
| ENSDARG00000086451 | CR318624.1        | 0.382302109 | -1.387214935 | 7.63E-05    | 0.000218241 |
| ENSDARG00000040625 | slc8a2b           | 0.382266338 | -1.387349933 | 3.21E-23    | 3.28E-22    |
| ENSDARG00000039951 | si:ch211-87j1.4   | 0.381832262 | -1.388989089 | 2.47E-10    | 1.16E-09    |
| ENSDARG00000076809 | si:ch211-141h20.6 | 0.381488454 | -1.3902887   | 0.001610964 | 0.003863294 |
| ENSDARG00000086731 | FSTL4 (2 of 2)    | 0.381267043 | -1.391126266 | 0.000589079 | 0.001499238 |
| ENSDARG00000033655 | stmn1b            | 0.381024874 | -1.392042914 | 3.44E-39    | 6.86E-38    |
| ENSDARG00000088020 | cdkn1d            | 0.380970522 | -1.392248721 | 6.55E-65    | 2.93E-63    |
| ENSDARG00000029114 | LMTK3             | 0.380849443 | -1.392707308 | 8.85E-78    | 5.56E-76    |
| ENSDARG00000059781 | atcayb            | 0.380693574 | -1.393297876 | 1.69E-05    | 5.19E-05    |
| ENSDARG00000078088 | CR339051.1        | 0.380356165 | -1.394577106 | 8.19E-33    | 1.26E-31    |
| ENSDARG00000070005 | GABRA2 (2 of 2)   | 0.38022896  | -1.395059677 | 0.000710169 | 0.001788487 |
| ENSDARG00000079656 | FAM171A2 (2 of 2) | 0.380074503 | -1.395645849 | 4.32E-88    | 3.37E-86    |
| ENSDARG00000075539 | snphb             | 0.379919842 | -1.396233034 | 2.60E-15    | 1.70E-14    |
| ENSDARG00000087088 | si:ch211-274p24.4 | 0.379835429 | -1.396553617 | 9.02E-15    | 5.72E-14    |
| ENSDARG00000079741 | CSRN3             | 0.379801724 | -1.396681643 | 4.26E-33    | 6.61E-32    |
| ENSDARG00000076820 | xkr8.2            | 0.379766801 | -1.396814303 | 1.62E-11    | 8.29E-11    |
| ENSDARG00000009965 | mag               | 0.379397598 | -1.398217551 | 2.60E-25    | 2.90E-24    |
| ENSDARG00000059682 | slc43a3a          | 0.379092544 | -1.399378014 | 1.02E-20    | 9.19E-20    |
| ENSDARG00000074781 | ptprt             | 0.379020091 | -1.399653771 | 1.08E-65    | 4.95E-64    |
| ENSDARG00000068787 | slc6a17           | 0.378788858 | -1.4005342   | 8.43E-38    | 1.58E-36    |
| ENSDARG00000036058 | gnao1b            | 0.378709294 | -1.400837267 | 3.22E-88    | 2.52E-86    |
| ENSDARG00000077343 | CT573264.2        | 0.378604133 | -1.401237934 | 0.000288124 | 0.000763164 |
| ENSDARG00000061082 | CR936337.1        | 0.378457954 | -1.401795068 | 2.05E-21    | 1.91E-20    |

|                    |                   |             |              |             |             |
|--------------------|-------------------|-------------|--------------|-------------|-------------|
| ENSDARG00000034493 | grin2aa           | 0.378339639 | -1.402246158 | 1.19E-54    | 4.13E-53    |
| ENSDARG00000010031 | ssh1b             | 0.378246094 | -1.402602909 | 1.04E-43    | 2.52E-42    |
| ENSDARG00000078258 | GGT5 (2 of 2)     | 0.37811735  | -1.403094045 | 9.85E-08    | 3.74E-07    |
| ENSDARG00000003250 | pik3cd            | 0.378065562 | -1.403291655 | 9.48E-15    | 6.01E-14    |
| ENSDARG00000003290 | dab1b             | 0.377856989 | -1.404087786 | 4.07E-13    | 2.32E-12    |
| ENSDARG00000074524 | CNTNAP1           | 0.37782267  | -1.404218826 | 1.09E-21    | 1.03E-20    |
| ENSDARG00000042608 | CABZ01078431.1    | 0.377821397 | -1.404223689 | 9.61E-19    | 7.72E-18    |
| ENSDARG00000033473 |                   | 0.377726283 | -1.404586921 | 0.011768562 | 0.024692081 |
| ENSDARG00000061885 | satb2             | 0.377719093 | -1.404614382 | 2.40E-39    | 4.82E-38    |
| ENSDARG00000076701 | B4GALNT4 (2 of 2) | 0.377717933 | -1.404618815 | 6.79E-19    | 5.51E-18    |
| ENSDARG00000056690 | mtmr1a            | 0.377595588 | -1.405086187 | 3.36E-67    | 1.61E-65    |
| ENSDARG00000088522 | CR847851.5        | 0.377564137 | -1.40520636  | 0.000129451 | 0.000359681 |
| ENSDARG00000092082 | si:ch1073-44m10.1 | 0.377250638 | -1.406404756 | 9.45E-09    | 3.92E-08    |
| ENSDARG00000087127 | TCERG1L           | 0.377194572 | -1.40661918  | 2.11E-09    | 9.20E-09    |
| ENSDARG00000060877 | edil3b            | 0.377166698 | -1.406725796 | 4.02E-08    | 1.58E-07    |
| ENSDARG00000043662 | cnih2             | 0.377139397 | -1.406830228 | 2.68E-54    | 9.13E-53    |
| ENSDARG00000031049 | igsf21a           | 0.37689499  | -1.407765476 | 2.46E-37    | 4.51E-36    |
| ENSDARG00000091605 | U6                | 0.376724055 | -1.40841994  | 0.020078353 | 0.040219198 |
| ENSDARG00000029374 | dennd1b           | 0.37640231  | -1.409652614 | 8.07E-13    | 4.49E-12    |
| ENSDARG00000068232 | cbln12            | 0.376398539 | -1.409667065 | 0.000774578 | 0.001940748 |
| ENSDARG00000044319 | fstl4             | 0.376353374 | -1.409840191 | 1.21E-11    | 6.22E-11    |
| ENSDARG00000022487 | DYNC111 (1 of 2)  | 0.37629652  | -1.410058146 | 1.73E-19    | 1.45E-18    |
| ENSDARG00000022109 | kcnip1a           | 0.376257097 | -1.410209301 | 8.95E-45    | 2.24E-43    |
| ENSDARG00000021595 | lhfp13            | 0.37624538  | -1.410254228 | 3.42E-76    | 2.07E-74    |
| ENSDARG00000079308 | tor3a             | 0.37559375  | -1.412755038 | 9.46E-44    | 2.29E-42    |
| ENSDARG00000060354 | samd7             | 0.375383114 | -1.413564339 | 1.09E-37    | 2.03E-36    |
| ENSDARG00000086973 | GPRIN1            | 0.375355608 | -1.413670059 | 1.99E-08    | 8.02E-08    |
| ENSDARG00000054575 | waif2             | 0.375337444 | -1.413739875 | 1.47E-05    | 4.53E-05    |
| ENSDARG00000043904 | pncr1             | 0.375228712 | -1.41415787  | 1.66E-12    | 9.04E-12    |
| ENSDARG00000059773 | SRCIN1 (2 of 2)   | 0.375046177 | -1.41485986  | 1.89E-72    | 1.03E-70    |



|                    |                    |             |              |             |             |
|--------------------|--------------------|-------------|--------------|-------------|-------------|
| ENSDARG00000096449 | NLRP6 (140 of 145) | 0.374837168 | -1.415664082 | 0.007595362 | 0.016432424 |
| ENSDARG00000078528 |                    | 0.374743009 | -1.416026532 | 2.76E-86    | 2.09E-84    |
| ENSDARG00000088117 | FUT8 (2 of 2)      | 0.374739129 | -1.416041468 | 8.84E-13    | 4.91E-12    |
| ENSDARG00000076712 | RPH3A (2 of 2)     | 0.374351051 | -1.417536289 | 1.83E-34    | 2.99E-33    |
| ENSDARG00000062887 | steap2             | 0.374013406 | -1.418838114 | 7.33E-29    | 9.53E-28    |
| ENSDARG00000033832 | ampd1              | 0.37391631  | -1.419212694 | 1.23E-46    | 3.25E-45    |
| ENSDARG00000074601 | cbln2a             | 0.373802449 | -1.419652074 | 0.000136784 | 0.000378831 |
| ENSDARG00000068477 | csdc2b             | 0.373748969 | -1.419858494 | 9.37E-09    | 3.89E-08    |
| ENSDARG00000052437 | MIA                | 0.373454983 | -1.420993745 | 2.75E-35    | 4.69E-34    |
| ENSDARG00000057575 | pnp4a              | 0.373330271 | -1.421475601 | 1.03E-90    | 8.53E-89    |
| ENSDARG00000095192 | si:dkey-150k17.2   | 0.3732613   | -1.421742159 | 8.93E-30    | 1.21E-28    |
| ENSDARG00000005853 | slc25a6            | 0.372861421 | -1.423288564 | 4.41E-33    | 6.83E-32    |
| ENSDARG00000045230 | cox6b1             | 0.372823094 | -1.423436867 | 2.70E-90    | 2.21E-88    |
| ENSDARG00000097781 | si:ch73-374e19.2   | 0.372773731 | -1.423627896 | 1.18E-11    | 6.11E-11    |
| ENSDARG00000062621 | SATB1              | 0.372542357 | -1.424523629 | 1.43E-68    | 7.04E-67    |
| ENSDARG00000080021 | BX548160.2         | 0.372466579 | -1.424817114 | 1.54E-06    | 5.24E-06    |
| ENSDARG00000043852 | CABZ01092941.1     | 0.372321539 | -1.425379017 | 1.23E-10    | 5.91E-10    |
| ENSDARG00000033447 | nxph1              | 0.372264471 | -1.425600165 | 1.50E-71    | 8.02E-70    |
| ENSDARG00000030547 | rnd1               | 0.372006496 | -1.426600282 | 3.12E-74    | 1.77E-72    |
| ENSDARG00000034373 | col27a1a           | 0.371981142 | -1.42669861  | 2.92E-91    | 2.50E-89    |
| ENSDARG00000086255 | si:rp71-1c10.10    | 0.371338961 | -1.429191402 | 0.007848659 | 0.016943013 |
| ENSDARG00000078327 | CEP170B (2 of 3)   | 0.371197377 | -1.429741579 | 1.30E-65    | 5.91E-64    |
| ENSDARG00000075209 | P4HTM              | 0.371189698 | -1.429771424 | 9.14E-26    | 1.04E-24    |
| ENSDARG00000013005 | opcml              | 0.371119603 | -1.430043888 | 4.33E-16    | 2.97E-15    |
| ENSDARG00000078832 | si:dkey-73p2.4     | 0.370944906 | -1.430723166 | 1.33E-05    | 4.12E-05    |
| ENSDARG00000068701 | gpr85              | 0.370890393 | -1.430935196 | 1.33E-82    | 9.40E-81    |
| ENSDARG00000017162 | CABZ01076801.1     | 0.370766192 | -1.431418397 | 1.18E-58    | 4.53E-57    |
| ENSDARG00000018436 | CABZ01096573.1     | 0.370682057 | -1.431745813 | 1.39E-27    | 1.72E-26    |
| ENSDARG00000079347 | zgc:194659         | 0.370638485 | -1.431915406 | 1.13E-14    | 7.13E-14    |
| ENSDARG00000089986 | TP53INP2           | 0.370561944 | -1.432213368 | 1.78E-78    | 1.13E-76    |

|                    |                    |             |              |             |             |
|--------------------|--------------------|-------------|--------------|-------------|-------------|
| ENSDARG00000061990 | kcnh4              | 0.370555562 | -1.432238217 | 3.83E-08    | 1.51E-07    |
| ENSDARG00000070173 | gria2a             | 0.37025483  | -1.433409538 | 3.07E-91    | 2.62E-89    |
| ENSDARG00000092466 | thbs2a             | 0.370130442 | -1.433894297 | 2.04E-15    | 1.35E-14    |
| ENSDARG00000020544 | rem1               | 0.370078839 | -1.43409545  | 7.80E-30    | 1.06E-28    |
| ENSDARG00000044091 | pitpnab            | 0.370049301 | -1.434210604 | 9.73E-67    | 4.61E-65    |
| ENSDARG00000063007 | apc2               | 0.36946223  | -1.43650121  | 1.00E-77    | 6.28E-76    |
| ENSDARG00000014273 | camk2d2            | 0.369429723 | -1.436628151 | 2.94E-93    | 2.63E-91    |
| ENSDARG00000092151 | si:dkey-40i22.5    | 0.36927752  | -1.437222654 | 0.001104973 | 0.002709553 |
| ENSDARG00000089593 | pcdh2ab11          | 0.369248959 | -1.43733424  | 6.50E-11    | 3.18E-10    |
| ENSDARG00000097012 | si:dkey-225f23.5   | 0.36915941  | -1.437684161 | 6.76E-25    | 7.42E-24    |
| ENSDARG00000056087 | C9H2orf40 (1 of 2) | 0.368979512 | -1.438387382 | 9.58E-25    | 1.04E-23    |
| ENSDARG00000059939 | dab1a              | 0.368910428 | -1.438657526 | 2.57E-44    | 6.33E-43    |
| ENSDARG00000079933 | SLC46A3 (2 of 2)   | 0.368749602 | -1.439286602 | 3.09E-48    | 8.60E-47    |
| ENSDARG00000009738 | cacnb4a            | 0.368645129 | -1.4396954   | 3.54E-14    | 2.16E-13    |
| ENSDARG00000090744 | CABZ01089777.1     | 0.368592654 | -1.439900778 | 0.001062899 | 0.002614278 |
| ENSDARG00000078650 | KCNA4              | 0.368541712 | -1.440100182 | 1.81E-07    | 6.74E-07    |
| ENSDARG00000096238 | si:dkey-156n14.10  | 0.368527135 | -1.440157243 | 0.00011129  | 0.000311935 |
| ENSDARG00000059173 | gdf2               | 0.368451623 | -1.440452887 | 0.00787685  | 0.016998358 |
| ENSDARG00000087438 | si:dkey-257i7.5    | 0.368307278 | -1.441018188 | 0.012598188 | 0.026289096 |
| ENSDARG00000076777 | BX119910.5         | 0.36815175  | -1.441627536 | 2.00E-14    | 1.24E-13    |
| ENSDARG00000007398 | LRRK2 (1 of 2)     | 0.368079797 | -1.441909529 | 2.10E-16    | 1.47E-15    |
| ENSDARG00000061042 | gabbr2             | 0.367911006 | -1.442571258 | 4.12E-25    | 4.57E-24    |
| ENSDARG00000070473 | parp6b             | 0.367865677 | -1.442749019 | 2.81E-39    | 5.63E-38    |
| ENSDARG00000039434 | oprml              | 0.367662425 | -1.443546352 | 1.04E-06    | 3.60E-06    |
| ENSDARG00000059311 | dpysl5b            | 0.367535779 | -1.444043393 | 4.28E-91    | 3.61E-89    |
| ENSDARG00000061117 | agap2              | 0.367516313 | -1.444119807 | 2.05E-65    | 9.28E-64    |
| ENSDARG00000023373 | lppr5b             | 0.367409812 | -1.444537939 | 3.08E-06    | 1.02E-05    |
| ENSDARG00000020489 | CASKIN1 (1 of 2)   | 0.367183035 | -1.445428691 | 1.17E-62    | 4.95E-61    |
| ENSDARG00000086307 | PCDHGC5 (8 of 31)  | 0.367080772 | -1.44583055  | 6.68E-05    | 0.000192154 |
| ENSDARG00000022509 | cox4i2             | 0.367041013 | -1.445986817 | 6.04E-55    | 2.11E-53    |

|                    |                  |             |              |             |             |
|--------------------|------------------|-------------|--------------|-------------|-------------|
| ENSDARG00000017466 | ncam2            | 0.367038959 | -1.445994892 | 1.64E-73    | 9.16E-72    |
| ENSDARG00000068407 | six9             | 0.366602899 | -1.4477099   | 0.000863727 | 0.002149897 |
| ENSDARG00000061829 | UNC13A (1 of 2)  | 0.366044524 | -1.449908954 | 1.06E-77    | 6.62E-76    |
| ENSDARG00000030097 | sdcbp            | 0.366016302 | -1.45002019  | 8.37E-69    | 4.14E-67    |
| ENSDARG00000039979 | tecl2            | 0.36593101  | -1.450356415 | 1.10E-09    | 4.91E-09    |
| ENSDARG00000055172 | si:ch211-256m1.8 | 0.365870341 | -1.450595627 | 2.22E-94    | 2.09E-92    |
| ENSDARG00000060259 | zgc:162160       | 0.365724582 | -1.451170494 | 1.84E-09    | 8.07E-09    |
| ENSDARG00000076044 | TRHDE (2 of 2)   | 0.36556965  | -1.451781793 | 8.87E-63    | 3.77E-61    |
| ENSDARG00000075697 | si:ch73-380l3.1  | 0.365504144 | -1.452040332 | 2.26E-20    | 1.99E-19    |
| ENSDARG00000019945 | ptprdb           | 0.365497701 | -1.452065765 | 2.77E-74    | 1.58E-72    |
| ENSDARG00000070831 | rftn1a           | 0.365261522 | -1.452998313 | 1.08E-06    | 3.74E-06    |
| ENSDARG00000079962 | doc2d            | 0.365011282 | -1.453987039 | 2.98E-17    | 2.20E-16    |
| ENSDARG00000078190 | zgc:193751       | 0.364948011 | -1.454237136 | 4.93E-10    | 2.26E-09    |
| ENSDARG00000087946 | UNC13C (3 of 3)  | 0.364870953 | -1.454541789 | 4.64E-07    | 1.66E-06    |
| ENSDARG00000075676 | FNDC7 (2 of 8)   | 0.364821322 | -1.454738046 | 1.87E-38    | 3.62E-37    |
| ENSDARG00000062013 | TRHDE (1 of 2)   | 0.364499057 | -1.456013012 | 1.27E-15    | 8.47E-15    |
| ENSDARG00000090391 | ugt2b3           | 0.364397788 | -1.456413893 | 2.05E-15    | 1.35E-14    |
| ENSDARG00000069254 | chrn4a           | 0.364378613 | -1.456489813 | 5.66E-18    | 4.34E-17    |
| ENSDARG00000059818 | kif5ab           | 0.364027348 | -1.457881256 | 2.68E-18    | 2.10E-17    |
| ENSDARG00000051823 | hyal4            | 0.36400482  | -1.457970543 | 2.91E-37    | 5.34E-36    |
| ENSDARG00000057481 | RNF157           | 0.363963735 | -1.458133388 | 2.80E-86    | 2.11E-84    |
| ENSDARG00000074372 | elfn1b           | 0.363797401 | -1.45879286  | 1.03E-18    | 8.28E-18    |
| ENSDARG00000088307 | mk12a            | 0.36358479  | -1.459636248 | 4.07E-06    | 1.33E-05    |
| ENSDARG00000076443 | CR388231.1       | 0.363572019 | -1.459686921 | 2.54E-34    | 4.12E-33    |
| ENSDARG00000074794 | NECAB3           | 0.363411806 | -1.460322807 | 1.14E-45    | 2.93E-44    |
| ENSDARG00000061753 | CABZ01083827.1   | 0.363391083 | -1.460405078 | 0.000253726 | 0.000677039 |
| ENSDARG00000036344 | calb2b           | 0.363331148 | -1.460643042 | 1.45E-93    | 1.33E-91    |
| ENSDARG00000071375 | celf5a           | 0.363261286 | -1.460920475 | 8.38E-39    | 1.64E-37    |
| ENSDARG00000028066 | diras1a          | 0.363031823 | -1.461832075 | 1.92E-88    | 1.51E-86    |
| ENSDARG00000052099 | agxta            | 0.36296017  | -1.462116853 | 3.65E-43    | 8.62E-42    |

|                    |                   |             |              |             |             |
|--------------------|-------------------|-------------|--------------|-------------|-------------|
| ENSDARG00000076248 | ppp1r3db          | 0.362709133 | -1.463115022 | 8.71E-15    | 5.53E-14    |
| ENSDARG00000063215 | lrrc3b            | 0.362640275 | -1.463388934 | 3.82E-07    | 1.38E-06    |
| ENSDARG00000079414 | sez6b             | 0.362612649 | -1.463498842 | 6.43E-74    | 3.63E-72    |
| ENSDARG00000028857 | SGSM1 (1 of 2)    | 0.362521627 | -1.46386103  | 3.22E-29    | 4.25E-28    |
| ENSDARG00000077715 | GRIK3             | 0.362437415 | -1.464196202 | 5.27E-28    | 6.60E-27    |
| ENSDARG00000071205 | tmem170b          | 0.36243599  | -1.464201871 | 0.01041357  | 0.022016575 |
| ENSDARG00000039145 | plaub             | 0.362296245 | -1.464758243 | 4.63E-05    | 0.000135588 |
| ENSDARG00000044053 | vsnl1b            | 0.362102558 | -1.465529727 | 1.35E-93    | 1.24E-91    |
| ENSDARG00000060539 | SHANK1 (1 of 2)   | 0.362043487 | -1.465765096 | 2.27E-79    | 1.49E-77    |
| ENSDARG00000062538 | TMEM132B          | 0.362016905 | -1.465871028 | 6.78E-24    | 7.11E-23    |
| ENSDARG00000052766 | EVI5L             | 0.361898034 | -1.466344824 | 9.36E-33    | 1.43E-31    |
| ENSDARG00000057728 | slc17a8           | 0.361745593 | -1.466952655 | 6.16E-08    | 2.38E-07    |
| ENSDARG00000039385 | dlg4b             | 0.361497435 | -1.467942686 | 5.91E-47    | 1.58E-45    |
| ENSDARG00000088315 | si:ch211-103f14.3 | 0.361234293 | -1.468993236 | 1.67E-22    | 1.64E-21    |
| ENSDARG00000045979 |                   | 0.361080847 | -1.469606197 | 4.48E-35    | 7.53E-34    |
| ENSDARG00000036031 | sept5b            | 0.361027162 | -1.469820714 | 3.36E-94    | 3.15E-92    |
| ENSDARG00000016739 | LRRC4C            | 0.360983488 | -1.469995246 | 1.63E-23    | 1.68E-22    |
| ENSDARG00000043410 | xkr6              | 0.360712856 | -1.471077252 | 3.75E-20    | 3.26E-19    |
| ENSDARG00000091573 | CU693477.1        | 0.360687541 | -1.471178504 | 0.001477937 | 0.003561112 |
| ENSDARG00000057751 | zbtb47a           | 0.360657993 | -1.471296697 | 8.20E-12    | 4.28E-11    |
| ENSDARG00000061819 | wscd2             | 0.36063913  | -1.471372154 | 4.94E-13    | 2.79E-12    |
| ENSDARG00000061517 | lrp1bb            | 0.360595734 | -1.471545766 | 9.24E-80    | 6.13E-78    |
| ENSDARG00000020979 | FAM65C            | 0.36038895  | -1.472373317 | 8.00E-44    | 1.95E-42    |
| ENSDARG00000013020 | dtnbb             | 0.360163768 | -1.473275039 | 1.95E-38    | 3.76E-37    |
| ENSDARG00000059763 | gabrd             | 0.360133818 | -1.473395014 | 1.91E-46    | 5.02E-45    |
| ENSDARG00000033635 | NPFFR2.1          | 0.359529553 | -1.475817731 | 3.63E-05    | 0.000107574 |
| ENSDARG00000098051 | si:busm1-234g15.3 | 0.359284335 | -1.47680206  | 1.88E-08    | 7.63E-08    |
| ENSDARG00000079670 | lrrc7             | 0.358958972 | -1.478109139 | 3.11E-52    | 9.88E-51    |
| ENSDARG00000056876 | si:dkey-43b14.9   | 0.35875355  | -1.478934988 | 0.00310564  | 0.007159477 |
| ENSDARG00000090084 | PLCB1             | 0.358706751 | -1.479123199 | 1.17E-12    | 6.46E-12    |

|                    |                    |             |              |             |             |
|--------------------|--------------------|-------------|--------------|-------------|-------------|
| ENSDARG00000088741 | si:dkey-19n13.5    | 0.358490207 | -1.479994387 | 3.80E-58    | 1.43E-56    |
| ENSDARG00000039626 | nrgna              | 0.358472581 | -1.480065323 | 2.15E-26    | 2.53E-25    |
| ENSDARG00000075170 | ZDHC2              | 0.358449583 | -1.480157883 | 1.04E-32    | 1.59E-31    |
| ENSDARG00000057678 | sfrp1b             | 0.358304637 | -1.480741382 | 1.97E-25    | 2.21E-24    |
| ENSDARG00000070575 | fam131bb           | 0.358290512 | -1.480798254 | 6.21E-23    | 6.23E-22    |
| ENSDARG00000036560 | si:dkey-24g18.3    | 0.358215416 | -1.481100671 | 2.13E-09    | 9.28E-09    |
| ENSDARG00000091977 | si:dkey-195m1.4    | 0.358193925 | -1.481187224 | 0.000903167 | 0.002240805 |
| ENSDARG00000028552 | lppr3b             | 0.35818257  | -1.48123296  | 5.67E-45    | 1.43E-43    |
| ENSDARG00000097472 | si:dkey-45l12.1    | 0.35810743  | -1.481535643 | 5.91E-05    | 0.00017103  |
| ENSDARG00000063157 | mapk8ip2           | 0.357973092 | -1.482076947 | 2.10E-91    | 1.81E-89    |
| ENSDARG00000006341 | tas1r3             | 0.357929472 | -1.482252755 | 0.010647372 | 0.022474094 |
| ENSDARG00000089562 | BX957322.2         | 0.357876073 | -1.482468003 | 6.65E-53    | 2.16E-51    |
| ENSDARG00000052667 | snn                | 0.357816137 | -1.482709644 | 2.61E-20    | 2.30E-19    |
| ENSDARG00000079977 | NHS (2 of 2)       | 0.357783707 | -1.482840404 | 6.21E-60    | 2.46E-58    |
| ENSDARG00000056037 | itih6              | 0.357688682 | -1.483223625 | 2.66E-28    | 3.37E-27    |
| ENSDARG00000094197 | si:ch211-196c10.11 | 0.357539726 | -1.483824546 | 1.36E-17    | 1.02E-16    |
| ENSDARG00000058117 | snap25b            | 0.357351815 | -1.48458298  | 2.82E-99    | 2.92E-97    |
| ENSDARG00000093123 |                    | 0.357327819 | -1.484679857 | 5.49E-11    | 2.70E-10    |
| ENSDARG00000018270 | olfm1a             | 0.357242946 | -1.485022569 | 1.99E-81    | 1.36E-79    |
| ENSDARG00000042531 | RYR3 (1 of 3)      | 0.35703103  | -1.48587863  | 0.000342865 | 0.000901187 |
| ENSDARG00000061162 | ephx4              | 0.357010421 | -1.48596191  | 6.69E-15    | 4.28E-14    |
| ENSDARG00000063282 |                    | 0.35692862  | -1.486292506 | 8.38E-08    | 3.20E-07    |
| ENSDARG00000014287 | eno2               | 0.356766228 | -1.486949041 | 5.93E-98    | 6.02E-96    |
| ENSDARG00000074376 | MDGA1              | 0.356730026 | -1.487095444 | 1.63E-15    | 1.08E-14    |
| ENSDARG00000002394 | ugt5d1             | 0.356601097 | -1.487616953 | 2.56E-06    | 8.54E-06    |
| ENSDARG00000056753 | dctn1b             | 0.356546881 | -1.487836312 | 9.75E-85    | 7.12E-83    |
| ENSDARG00000011941 | bmpr2a             | 0.356441864 | -1.488261305 | 2.70E-93    | 2.43E-91    |
| ENSDARG00000087877 |                    | 0.356309912 | -1.488795477 | 0.001411744 | 0.003411165 |
| ENSDARG00000034862 | f7                 | 0.356202887 | -1.489228886 | 8.26E-46    | 2.13E-44    |
| ENSDARG00000023609 | epha8              | 0.356166096 | -1.489377903 | 4.46E-39    | 8.87E-38    |

|                    |                  |             |              |             |             |
|--------------------|------------------|-------------|--------------|-------------|-------------|
| ENSDARG00000069026 |                  | 0.356105945 | -1.489621574 | 0.006427484 | 0.014102248 |
| ENSDARG00000086272 | si:dkey-4p15.5   | 0.356085641 | -1.489703832 | 9.85E-36    | 1.71E-34    |
| ENSDARG00000095963 | si:ch73-361h17.1 | 0.355956925 | -1.490225425 | 1.23E-06    | 4.23E-06    |
| ENSDARG00000086462 | PTPRR            | 0.355740439 | -1.491103114 | 5.53E-23    | 5.57E-22    |
| ENSDARG00000008100 | slc7a10a         | 0.355673041 | -1.491376468 | 8.93E-94    | 8.30E-92    |
| ENSDARG00000037359 | CDR2 (2 of 2)    | 0.355242382 | -1.493124383 | 0.000128531 | 0.000357333 |
| ENSDARG00000039500 | LRFN3            | 0.355209236 | -1.493259001 | 8.81E-18    | 6.71E-17    |
| ENSDARG00000055622 | zgc:153345       | 0.355017629 | -1.49403743  | 0.000440663 | 0.001141451 |
| ENSDARG00000097576 | VAMP1 (2 of 2)   | 0.354677122 | -1.495421823 | 4.49E-14    | 2.72E-13    |
| ENSDARG00000036913 | st6galnac6       | 0.354662133 | -1.495482793 | 3.93E-10    | 1.81E-09    |
| ENSDARG00000088852 | CABZ01051991.1   | 0.35457164  | -1.495850947 | 7.05E-27    | 8.45E-26    |
| ENSDARG00000063713 | SYNGAP1 (1 of 2) | 0.354524912 | -1.496041086 | 3.92E-65    | 1.76E-63    |
| ENSDARG00000029590 | jph3             | 0.354457887 | -1.496313863 | 3.77E-62    | 1.57E-60    |
| ENSDARG00000052764 | chrnb3a          | 0.354152132 | -1.497558869 | 3.36E-51    | 1.03E-49    |
| ENSDARG00000078908 | fbxo41           | 0.353922034 | -1.498496513 | 3.68E-25    | 4.08E-24    |
| ENSDARG00000076213 | DOCK4 (2 of 2)   | 0.35366585  | -1.499541175 | 5.77E-44    | 1.41E-42    |
| ENSDARG00000079971 | CABZ01080134.1   | 0.353657881 | -1.499573686 | 1.40E-05    | 4.34E-05    |
| ENSDARG00000091823 |                  | 0.353376179 | -1.500723305 | 1.05E-13    | 6.19E-13    |
| ENSDARG00000059057 | atpv0e2          | 0.352983266 | -1.502328306 | 2.09E-62    | 8.82E-61    |
| ENSDARG00000004187 |                  | 0.352681617 | -1.503561716 | 3.49E-29    | 4.59E-28    |
| ENSDARG00000044850 | AL627305.1       | 0.352659306 | -1.503652984 | 8.24E-05    | 0.000234996 |
| ENSDARG00000088405 | svilb            | 0.352481026 | -1.504382497 | 1.59E-17    | 1.19E-16    |
| ENSDARG00000078078 | lrfn4b           | 0.352265009 | -1.505266917 | 2.88E-56    | 1.04E-54    |
| ENSDARG00000063169 | UBN1             | 0.352239512 | -1.505371343 | 7.63E-08    | 2.92E-07    |
| ENSDARG00000062462 | SHISA7 (1 of 2)  | 0.352088775 | -1.505988864 | 3.87E-44    | 9.51E-43    |
| ENSDARG00000090883 | gabra3           | 0.352028312 | -1.50623663  | 1.21E-08    | 4.98E-08    |
| ENSDARG00000074317 | FAM20C (1 of 2)  | 0.351991835 | -1.50638613  | 1.19E-08    | 4.88E-08    |
| ENSDARG00000089874 | pcdh2ab8         | 0.35193281  | -1.506628076 | 1.07E-09    | 4.81E-09    |
| ENSDARG00000069296 | moxd1l           | 0.351729944 | -1.507459935 | 4.86E-11    | 2.40E-10    |
| ENSDARG00000070038 | rbp2a            | 0.351626469 | -1.507884419 | 2.01E-101   | 2.17E-99    |

|                    |                 |             |              |             |             |
|--------------------|-----------------|-------------|--------------|-------------|-------------|
| ENSDARG00000060875 | pde1a           | 0.351545859 | -1.508215194 | 3.93E-23    | 3.99E-22    |
| ENSDARG00000041431 | slc24a1         | 0.351290364 | -1.509264089 | 6.08E-07    | 2.16E-06    |
| ENSDARG00000032714 | gria1b          | 0.351108176 | -1.510012504 | 5.61E-26    | 6.49E-25    |
| ENSDARG00000062618 |                 | 0.3509881   | -1.510505976 | 2.18E-42    | 4.95E-41    |
| ENSDARG00000045799 | acarb           | 0.350837909 | -1.511123452 | 1.57E-80    | 1.06E-78    |
| ENSDARG00000042922 | gpr173          | 0.350733858 | -1.511551387 | 1.93E-48    | 5.41E-47    |
| ENSDARG00000079620 | amigo1          | 0.350503839 | -1.512497849 | 1.53E-39    | 3.11E-38    |
| ENSDARG00000040490 | dusp19a         | 0.350389543 | -1.512968375 | 0.000172503 | 0.000471011 |
| ENSDARG00000079182 | NPAS3           | 0.350375139 | -1.513027683 | 2.69E-102   | 2.95E-100   |
| ENSDARG00000017391 | unc13ba         | 0.350263858 | -1.513485963 | 1.64E-12    | 8.95E-12    |
| ENSDARG00000037553 | il1rapl2        | 0.350151277 | -1.513949744 | 8.98E-06    | 2.83E-05    |
| ENSDARG00000018065 | ntm             | 0.35011546  | -1.514097328 | 1.77E-11    | 9.05E-11    |
| ENSDARG00000089380 | RASAL1 (2 of 2) | 0.350045796 | -1.514384414 | 0.003208374 | 0.007375963 |
| ENSDARG00000062723 | ZFYVE9 (2 of 3) | 0.349892823 | -1.515015023 | 6.17E-05    | 0.000178243 |
| ENSDARG00000041791 | mgat4c          | 0.349414538 | -1.516988458 | 4.07E-22    | 3.90E-21    |
| ENSDARG00000090923 | CABZ01053592.1  | 0.349304111 | -1.517444471 | 3.36E-19    | 2.78E-18    |
| ENSDARG00000055722 | bco2a           | 0.349187304 | -1.517926989 | 3.29E-14    | 2.01E-13    |
| ENSDARG00000090721 | prdm2a          | 0.34911738  | -1.518215917 | 1.42E-64    | 6.29E-63    |
| ENSDARG00000043483 | otx5            | 0.349020827 | -1.518614966 | 1.69E-93    | 1.53E-91    |
| ENSDARG00000062744 | scn1lab         | 0.348907148 | -1.519084941 | 7.64E-92    | 6.70E-90    |
| ENSDARG00000095603 | grid2ipb        | 0.348745185 | -1.519754797 | 5.24E-41    | 1.12E-39    |
| ENSDARG00000056877 | vamp2           | 0.348663879 | -1.520091185 | 1.37E-93    | 1.25E-91    |
| ENSDARG00000060482 | mid1            | 0.348451926 | -1.520968468 | 3.21E-22    | 3.10E-21    |
| ENSDARG00000037738 | FBXL21          | 0.348266704 | -1.521735543 | 8.01E-07    | 2.81E-06    |
| ENSDARG00000068026 | PRKACA          | 0.348191014 | -1.522049125 | 0.000169893 | 0.000464284 |
| ENSDARG00000059719 | fam169aa        | 0.348090634 | -1.522465098 | 2.55E-20    | 2.24E-19    |
| ENSDARG00000062926 | prkar1b         | 0.347728267 | -1.523967746 | 2.43E-72    | 1.32E-70    |
| ENSDARG00000017446 | camk1db         | 0.347515023 | -1.524852748 | 2.02E-22    | 1.97E-21    |
| ENSDARG00000059601 | map1aa          | 0.347470731 | -1.525036635 | 2.44E-64    | 1.07E-62    |
| ENSDARG00000070037 | rgs8            | 0.347040597 | -1.526823654 | 8.07E-37    | 1.45E-35    |

|                    |                  |             |              |             |             |
|--------------------|------------------|-------------|--------------|-------------|-------------|
| ENSDARG00000052615 | tnmd             | 0.346830476 | -1.527697422 | 6.39E-88    | 4.96E-86    |
| ENSDARG00000061541 | unc5db           | 0.346818851 | -1.527745778 | 7.48E-24    | 7.83E-23    |
| ENSDARG00000038859 | rgs20            | 0.346399161 | -1.529492659 | 3.11E-66    | 1.46E-64    |
| ENSDARG00000009311 | pvalb6           | 0.346050774 | -1.530944363 | 1.23E-40    | 2.59E-39    |
| ENSDARG00000043835 | rab3ab           | 0.345976764 | -1.531252945 | 1.60E-52    | 5.15E-51    |
| ENSDARG00000044034 | tmem86a          | 0.345822688 | -1.531895573 | 2.96E-37    | 5.42E-36    |
| ENSDARG00000059368 | gria4b           | 0.34559701  | -1.532837361 | 1.34E-91    | 1.17E-89    |
| ENSDARG00000086919 | CABZ01073963.1   | 0.345328662 | -1.533958012 | 1.07E-06    | 3.72E-06    |
| ENSDARG00000038918 | drd1b            | 0.344864742 | -1.535897457 | 6.88E-11    | 3.36E-10    |
| ENSDARG00000037954 | tnnt1            | 0.344549683 | -1.537216064 | 2.90E-22    | 2.81E-21    |
| ENSDARG00000013669 | napba            | 0.34449382  | -1.537449994 | 1.03E-72    | 5.66E-71    |
| ENSDARG00000063011 | antxr2b          | 0.344327162 | -1.538148104 | 1.07E-12    | 5.89E-12    |
| ENSDARG00000093027 | BX119910.12      | 0.344229492 | -1.538557391 | 6.03E-10    | 2.74E-09    |
| ENSDARG00000042846 | disp2            | 0.34420695  | -1.538651867 | 8.83E-81    | 5.99E-79    |
| ENSDARG00000063008 | si:dkeyp-27e10.3 | 0.344127894 | -1.538983257 | 3.18E-88    | 2.49E-86    |
| ENSDARG00000041086 | CABZ01071177.1   | 0.344116038 | -1.539032962 | 0.001994339 | 0.004725247 |
| ENSDARG00000061749 | htr3b            | 0.343719954 | -1.540694486 | 1.78E-09    | 7.80E-09    |
| ENSDARG00000079295 | cacna1bb         | 0.343415543 | -1.541972758 | 4.03E-51    | 1.23E-49    |
| ENSDARG00000077489 | LRFN2 (2 of 2)   | 0.34332768  | -1.542341918 | 8.92E-29    | 1.16E-27    |
| ENSDARG00000052642 | shisa9b          | 0.343326028 | -1.542348861 | 0.000108626 | 0.000304919 |
| ENSDARG00000061019 | SHANK2 (1 of 2)  | 0.343223627 | -1.542779225 | 9.53E-12    | 4.95E-11    |
| ENSDARG00000086787 | CABZ01084877.1   | 0.342968248 | -1.543853079 | 1.01E-08    | 4.20E-08    |
| ENSDARG00000087644 | PCMTD2 (2 of 2)  | 0.342885382 | -1.544201697 | 2.54E-46    | 6.63E-45    |
| ENSDARG00000077022 | fam131a          | 0.34242014  | -1.546160538 | 5.82E-47    | 1.56E-45    |
| ENSDARG00000045301 | st8sia3          | 0.342381192 | -1.546324641 | 7.54E-11    | 3.67E-10    |
| ENSDARG00000056603 | mcf2b            | 0.342356339 | -1.546429368 | 1.22E-05    | 3.80E-05    |
| ENSDARG00000057498 | habp2            | 0.341948574 | -1.548148721 | 9.33E-29    | 1.21E-27    |
| ENSDARG00000015623 | cecr1b           | 0.341672776 | -1.549312793 | 1.76E-10    | 8.34E-10    |
| ENSDARG00000062077 | acsbg1           | 0.341599155 | -1.549623688 | 4.61E-06    | 1.50E-05    |
| ENSDARG00000076371 | SHROOM2 (1 of 2) | 0.341516395 | -1.549973255 | 1.17E-52    | 3.79E-51    |



|                    |                    |             |              |             |             |
|--------------------|--------------------|-------------|--------------|-------------|-------------|
| ENSDARG00000037904 | cacna1db           | 0.341424571 | -1.550361209 | 1.28E-09    | 5.69E-09    |
| ENSDARG00000045383 | GPR22 (2 of 2)     | 0.341289301 | -1.550932908 | 2.66E-12    | 1.43E-11    |
| ENSDARG00000093460 | GPR52              | 0.341226641 | -1.551197806 | 7.62E-11    | 3.71E-10    |
| ENSDARG00000043589 | ca4a               | 0.341167562 | -1.551447614 | 3.47E-26    | 4.05E-25    |
| ENSDARG00000052765 | gria2b             | 0.340820174 | -1.552917362 | 3.68E-105   | 4.24E-103   |
| ENSDARG00000038398 | PMM1               | 0.34060233  | -1.55383979  | 4.70E-11    | 2.32E-10    |
| ENSDARG00000062471 | fam19a4b           | 0.340504845 | -1.554252767 | 4.83E-11    | 2.39E-10    |
| ENSDARG00000076824 | CCKBR (2 of 2)     | 0.34049639  | -1.55428859  | 0.00205455  | 0.004855322 |
| ENSDARG00000009281 | dnm1b              | 0.340143912 | -1.555782827 | 1.34E-107   | 1.65E-105   |
| ENSDARG00000088075 | GRAMD3             | 0.33998502  | -1.556456912 | 1.50E-08    | 6.10E-08    |
| ENSDARG00000021573 | slc16a7            | 0.339594428 | -1.558115308 | 0.000141905 | 0.000392021 |
| ENSDARG00000087762 | RAB27B             | 0.339478772 | -1.558606731 | 4.98E-27    | 6.00E-26    |
| ENSDARG00000086314 | CU633991.1         | 0.339450279 | -1.558727826 | 0.005349041 | 0.011880115 |
| ENSDARG00000025189 | cpne8              | 0.339025954 | -1.560532372 | 1.41E-06    | 4.83E-06    |
| ENSDARG00000071592 | aqp8a.2            | 0.339013241 | -1.560586472 | 0.001619201 | 0.003881084 |
| ENSDARG00000076013 | mab21i3            | 0.33890221  | -1.561059051 | 7.42E-06    | 2.36E-05    |
| ENSDARG00000076264 | zgc:195170         | 0.338682285 | -1.561995568 | 0.003324935 | 0.007621118 |
| ENSDARG00000035606 | aldh3b2            | 0.338664268 | -1.562072315 | 0.001615514 | 0.003873226 |
| ENSDARG00000077609 | elfn2              | 0.338604142 | -1.562328472 | 2.64E-24    | 2.82E-23    |
| ENSDARG00000060837 | trpc5b             | 0.33840368  | -1.563182837 | 8.33E-11    | 4.05E-10    |
| ENSDARG00000093745 | htr1aa             | 0.338250209 | -1.56383727  | 0.001284907 | 0.003120614 |
| ENSDARG00000011088 | si:ch211-288d18.1  | 0.337981166 | -1.564985242 | 3.14E-45    | 7.96E-44    |
| ENSDARG00000040528 | lgals3bpb          | 0.337929833 | -1.565204377 | 4.08E-33    | 6.33E-32    |
| ENSDARG00000016460 | fut9a              | 0.337905719 | -1.565307328 | 1.13E-60    | 4.54E-59    |
| ENSDARG00000055192 | zgc:136930         | 0.337900326 | -1.565330351 | 7.15E-30    | 9.71E-29    |
| ENSDARG00000090748 | pcdh2ab9           | 0.337781396 | -1.565838222 | 0.001275982 | 0.003100529 |
| ENSDARG00000019930 | tal1               | 0.337778314 | -1.565851387 | 1.17E-82    | 8.29E-81    |
| ENSDARG00000093323 | NLRP6 (110 of 145) | 0.337697105 | -1.566198283 | 1.34E-15    | 8.98E-15    |
| ENSDARG00000021065 | camk2b2            | 0.337544075 | -1.566852199 | 5.43E-08    | 2.11E-07    |
| ENSDARG00000086133 | SERINC3            | 0.337535487 | -1.566888906 | 1.98E-06    | 6.68E-06    |

|                    |                   |             |              |             |             |
|--------------------|-------------------|-------------|--------------|-------------|-------------|
| ENSDARG00000055559 | chrna6            | 0.337190526 | -1.568364095 | 8.83E-19    | 7.10E-18    |
| ENSDARG00000015537 | gad2              | 0.336854998 | -1.569800392 | 6.62E-103   | 7.32E-101   |
| ENSDARG00000053487 | osbp2             | 0.336600805 | -1.570889466 | 2.05E-39    | 4.15E-38    |
| ENSDARG00000030376 | grin2bb           | 0.336262475 | -1.572340304 | 1.87E-85    | 1.38E-83    |
| ENSDARG00000063207 | erbb4a            | 0.336205803 | -1.57258347  | 8.40E-19    | 6.77E-18    |
| ENSDARG00000086992 | BX005106.1        | 0.335846098 | -1.574127826 | 1.93E-06    | 6.51E-06    |
| ENSDARG00000074066 | tas2r200.2        | 0.335745673 | -1.574559287 | 0.000619979 | 0.001573511 |
| ENSDARG00000043918 | TACR3 (2 of 3)    | 0.335369682 | -1.576175823 | 0.00128541  | 0.003121569 |
| ENSDARG00000053746 | OSBPL1A (2 of 2)  | 0.335027865 | -1.577647002 | 6.67E-12    | 3.50E-11    |
| ENSDARG00000043907 | fgf11b            | 0.334862229 | -1.578360441 | 1.55E-34    | 2.54E-33    |
| ENSDARG00000096687 | RGS7 (2 of 2)     | 0.334830679 | -1.578496375 | 1.19E-08    | 4.90E-08    |
| ENSDARG00000074640 |                   | 0.334604548 | -1.579471042 | 7.11E-05    | 0.000204197 |
| ENSDARG00000036156 | fnbp1             | 0.334458873 | -1.580099277 | 1.14E-47    | 3.13E-46    |
| ENSDARG00000029112 | gem               | 0.33435444  | -1.580549821 | 2.25E-16    | 1.58E-15    |
| ENSDARG00000071637 | ASIC1 (2 of 2)    | 0.334189905 | -1.58125994  | 3.40E-07    | 1.24E-06    |
| ENSDARG00000009442 | pip5k1cb          | 0.334033994 | -1.581933165 | 7.94E-17    | 5.75E-16    |
| ENSDARG00000035765 | CU694757.1        | 0.333895991 | -1.582529322 | 2.68E-07    | 9.83E-07    |
| ENSDARG00000089156 | egr3              | 0.333576091 | -1.583912209 | 4.49E-32    | 6.66E-31    |
| ENSDARG00000058695 | ddr2b             | 0.333553909 | -1.584008145 | 4.45E-49    | 1.28E-47    |
| ENSDARG00000018263 | pdia2             | 0.333541968 | -1.584059793 | 3.79E-23    | 3.85E-22    |
| ENSDARG00000077905 | CSMD3             | 0.333507914 | -1.584207099 | 6.51E-16    | 4.42E-15    |
| ENSDARG00000042703 | parp6a            | 0.333338453 | -1.584940342 | 7.24E-46    | 1.87E-44    |
| ENSDARG00000096922 | si:ch211-147k10.6 | 0.333233896 | -1.585392936 | 8.28E-13    | 4.61E-12    |
| ENSDARG00000062156 | ABI3BP (1 of 2)   | 0.333176274 | -1.585642426 | 0.001027682 | 0.002533362 |
| ENSDARG00000062510 | bcl11ba           | 0.333017468 | -1.58633024  | 2.26E-110   | 2.96E-108   |
| ENSDARG00000044212 | CR385063.1        | 0.332377383 | -1.589105879 | 3.42E-51    | 1.05E-49    |
| ENSDARG00000025891 | shox              | 0.332187393 | -1.589930774 | 1.59E-109   | 2.04E-107   |
| ENSDARG00000093768 | prr18             | 0.331874238 | -1.591291452 | 1.90E-107   | 2.33E-105   |
| ENSDARG00000036999 | PTCHD2            | 0.331724887 | -1.591940843 | 1.32E-30    | 1.85E-29    |
| ENSDARG00000075189 | cntnap5b          | 0.331647039 | -1.592279449 | 1.77E-58    | 6.76E-57    |

|                    |                     |             |              |             |             |
|--------------------|---------------------|-------------|--------------|-------------|-------------|
| ENSDARG00000076652 | zgc:193807          | 0.331376621 | -1.593456274 | 0.000116477 | 0.000325574 |
| ENSDARG00000088837 | CR631124.1          | 0.331202404 | -1.594214952 | 0.001300513 | 0.003156627 |
| ENSDARG00000036767 |                     | 0.331051366 | -1.594873011 | 5.46E-33    | 8.45E-32    |
| ENSDARG00000020191 | ppef1               | 0.331021127 | -1.595004797 | 7.54E-09    | 3.15E-08    |
| ENSDARG00000037084 | CPNE7               | 0.330919631 | -1.595447215 | 1.93E-25    | 2.17E-24    |
| ENSDARG00000090496 | THSD7A (2 of 2)     | 0.330790975 | -1.596008219 | 2.97E-13    | 1.71E-12    |
| ENSDARG00000034165 | lingo1a             | 0.330515962 | -1.597208149 | 2.77E-44    | 6.82E-43    |
| ENSDARG00000035652 | sat1a.1             | 0.330290082 | -1.598194445 | 1.31E-87    | 1.01E-85    |
| ENSDARG00000056080 | si:dkey-191g9.5     | 0.33026649  | -1.598297498 | 1.25E-19    | 1.06E-18    |
| ENSDARG00000092552 | FNDC7 (7 of 8)      | 0.330194675 | -1.59861124  | 0.000634102 | 0.001607489 |
| ENSDARG00000086169 | sgk494b             | 0.329990889 | -1.599501903 | 6.74E-13    | 3.77E-12    |
| ENSDARG00000053624 | csf1rb              | 0.32944345  | -1.601897249 | 1.67E-07    | 6.22E-07    |
| ENSDARG00000074761 | ccdc64              | 0.32933372  | -1.602377859 | 5.11E-13    | 2.89E-12    |
| ENSDARG00000004015 | adcyap1a            | 0.329245438 | -1.602764644 | 4.86E-06    | 1.57E-05    |
| ENSDARG00000029916 | KCNQ2 (1 of 2)      | 0.329133024 | -1.603257307 | 9.73E-07    | 3.38E-06    |
| ENSDARG00000086960 | GPC6 (2 of 3)       | 0.328999107 | -1.603844426 | 9.18E-05    | 0.000260445 |
| ENSDARG00000083909 | 5S_rRNA             | 0.328548929 | -1.605819857 | 0.008835296 | 0.018907321 |
| ENSDARG00000043951 | pcdh1g9             | 0.328530946 | -1.605898823 | 0.000313153 | 0.000827069 |
| ENSDARG00000078647 | samsn1b             | 0.328384447 | -1.606542297 | 0.006894388 | 0.015038404 |
| ENSDARG00000060018 | C14H5orf24 (1 of 2) | 0.328091926 | -1.607828004 | 9.69E-76    | 5.80E-74    |
| ENSDARG00000091395 | CABZ01067945.1      | 0.328061404 | -1.607962222 | 2.82E-114   | 3.98E-112   |
| ENSDARG00000092945 | si:ch211-250g4.3    | 0.328023511 | -1.60812887  | 0.000191703 | 0.000519839 |
| ENSDARG00000095253 | CU571315.2          | 0.328018818 | -1.608149512 | 1.03E-05    | 3.21E-05    |
| ENSDARG00000037905 | cacna1aa            | 0.327922407 | -1.60857361  | 6.54E-108   | 8.11E-106   |
| ENSDARG00000088061 | si:dkeyp-72e1.9     | 0.327602136 | -1.60998333  | 3.44E-26    | 4.02E-25    |
| ENSDARG00000077389 | PCDHGC4 (6 of 9)    | 0.32748943  | -1.610479753 | 3.63E-66    | 1.69E-64    |
| ENSDARG00000038814 | myrip               | 0.32738038  | -1.61096023  | 3.79E-91    | 3.21E-89    |
| ENSDARG00000039218 | GPR101              | 0.32737345  | -1.610990772 | 7.00E-13    | 3.91E-12    |
| ENSDARG00000086802 |                     | 0.327238946 | -1.611583637 | 7.84E-09    | 3.27E-08    |
| ENSDARG00000015531 | SLC4A8              | 0.326978414 | -1.612732698 | 6.14E-39    | 1.22E-37    |

|                    |                    |             |              |             |             |
|--------------------|--------------------|-------------|--------------|-------------|-------------|
| ENSDARG00000088418 | PCDHGC5 (19 of 31) | 0.326848334 | -1.613306751 | 7.29E-05    | 0.000209029 |
| ENSDARG00000054184 | btr06              | 0.326750726 | -1.613737653 | 0.000811047 | 0.002025337 |
| ENSDARG00000071894 | pcdh2g3            | 0.326727157 | -1.613841721 | 2.25E-08    | 9.05E-08    |
| ENSDARG00000045164 | nptx2b             | 0.32672014  | -1.613872707 | 0.006972264 | 0.015197771 |
| ENSDARG00000071076 | ldhbb              | 0.326510958 | -1.614796686 | 4.37E-25    | 4.83E-24    |
| ENSDARG00000058803 | grk1a              | 0.326492451 | -1.614878461 | 9.48E-17    | 6.83E-16    |
| ENSDARG00000025667 | bai2               | 0.326390816 | -1.615327629 | 1.21E-23    | 1.26E-22    |
| ENSDARG00000021660 | bsk146             | 0.326190226 | -1.616214543 | 6.38E-111   | 8.44E-109   |
| ENSDARG00000090424 | camk2n2            | 0.326109268 | -1.61657265  | 6.85E-31    | 9.71E-30    |
| ENSDARG00000054690 | si:dkey-166k12.1   | 0.325826661 | -1.617823435 | 1.01E-29    | 1.37E-28    |
| ENSDARG00000063299 | pcloa              | 0.325825312 | -1.617829412 | 5.21E-115   | 7.55E-113   |
| ENSDARG00000078034 | zgc:112001         | 0.325807641 | -1.617907658 | 2.68E-34    | 4.34E-33    |
| ENSDARG00000076459 | pcdhb              | 0.325786626 | -1.618000716 | 7.89E-08    | 3.02E-07    |
| ENSDARG00000005966 | slc4a5             | 0.325242283 | -1.620413268 | 1.15E-13    | 6.79E-13    |
| ENSDARG00000078504 | CU459081.1         | 0.325241483 | -1.620416818 | 6.49E-38    | 1.22E-36    |
| ENSDARG00000087342 | CABZ01117094.1     | 0.32519018  | -1.620644405 | 3.85E-15    | 2.50E-14    |
| ENSDARG00000062086 | kiaa1549lb         | 0.325184046 | -1.620671618 | 1.22E-12    | 6.73E-12    |
| ENSDARG00000037916 | cdk5r1a            | 0.325138152 | -1.620875241 | 9.51E-33    | 1.46E-31    |
| ENSDARG00000032838 | si:dkey-206f10.1   | 0.324925813 | -1.621817737 | 1.11E-18    | 8.90E-18    |
| ENSDARG00000074018 | btbd17a            | 0.324725327 | -1.622708183 | 2.60E-17    | 1.93E-16    |
| ENSDARG00000087061 | si:ch211-71k14.1   | 0.324634641 | -1.623111142 | 0.005429634 | 0.012049691 |
| ENSDARG00000060597 |                    | 0.324633078 | -1.623118087 | 4.54E-67    | 2.17E-65    |
| ENSDARG00000058701 | nos1apb            | 0.324099761 | -1.625490137 | 1.64E-29    | 2.18E-28    |
| ENSDARG00000093937 | cnn1b              | 0.324072918 | -1.625609634 | 1.05E-07    | 3.96E-07    |
| ENSDARG00000037747 | si:ch211-160d14.1  | 0.323798538 | -1.626831622 | 1.16E-35    | 2.00E-34    |
| ENSDARG00000087517 | btbd3b             | 0.32353359  | -1.62801259  | 4.78E-48    | 1.32E-46    |
| ENSDARG00000027419 | gad1b              | 0.323343942 | -1.628858514 | 1.45E-116   | 2.16E-114   |
| ENSDARG00000042041 | tal2               | 0.323221314 | -1.629405761 | 1.36E-53    | 4.54E-52    |
| ENSDARG00000076987 | SLITRK5 (2 of 2)   | 0.323167371 | -1.629646554 | 3.24E-54    | 1.10E-52    |
| ENSDARG00000063180 | dock3              | 0.323156858 | -1.629693485 | 2.18E-75    | 1.28E-73    |

|                    |                   |             |              |             |             |
|--------------------|-------------------|-------------|--------------|-------------|-------------|
| ENSDARG00000089257 | EYS               | 0.323108702 | -1.62990849  | 5.80E-05    | 0.00016794  |
| ENSDARG00000091799 | FAM217B (2 of 2)  | 0.322967363 | -1.630539712 | 4.96E-27    | 5.98E-26    |
| ENSDARG00000061362 | FAM69A (1 of 2)   | 0.322913454 | -1.630780542 | 1.36E-09    | 6.03E-09    |
| ENSDARG00000070148 | cygb2             | 0.322896764 | -1.63085511  | 5.29E-19    | 4.32E-18    |
| ENSDARG00000038363 | drd4a             | 0.322886188 | -1.630902368 | 5.10E-06    | 1.65E-05    |
| ENSDARG00000023771 | gabrb3            | 0.322644249 | -1.631983786 | 4.53E-55    | 1.58E-53    |
| ENSDARG00000055400 | ELMO1 (2 of 2)    | 0.322601944 | -1.632172963 | 3.13E-76    | 1.90E-74    |
| ENSDARG00000077552 | CABZ01081650.1    | 0.322342924 | -1.633331779 | 4.76E-26    | 5.52E-25    |
| ENSDARG00000097160 | si:ch211-121j5.4  | 0.32227672  | -1.633628119 | 1.46E-14    | 9.13E-14    |
| ENSDARG00000036433 | ERP27             | 0.322129119 | -1.634289014 | 1.51E-06    | 5.15E-06    |
| ENSDARG00000070504 | trpc5a            | 0.322119987 | -1.634329915 | 9.36E-05    | 0.000265233 |
| ENSDARG00000055377 | gnb5b             | 0.321409143 | -1.637517128 | 4.72E-49    | 1.35E-47    |
| ENSDARG00000056294 | SBK1              | 0.321311136 | -1.637957113 | 1.39E-41    | 3.03E-40    |
| ENSDARG00000090164 | NHSL2 (2 of 2)    | 0.321296283 | -1.638023803 | 8.58E-31    | 1.21E-29    |
| ENSDARG00000060116 | CAMK1 (2 of 2)    | 0.321265091 | -1.638163869 | 2.19E-44    | 5.42E-43    |
| ENSDARG00000040435 | SLC6A11           | 0.321138944 | -1.638730468 | 6.95E-91    | 5.79E-89    |
| ENSDARG00000086319 | BSN (3 of 3)      | 0.321120025 | -1.638815461 | 1.68E-12    | 9.15E-12    |
| ENSDARG00000079586 | gabrb2            | 0.320787478 | -1.640310268 | 2.72E-38    | 5.19E-37    |
| ENSDARG00000097610 | si:ch211-136a14.2 | 0.320679258 | -1.640797055 | 0.004276295 | 0.009634635 |
| ENSDARG00000014871 | syng3a            | 0.320592741 | -1.641186337 | 4.56E-119   | 7.19E-117   |
| ENSDARG00000063264 | PCDH9             | 0.320470707 | -1.641735602 | 4.32E-90    | 3.50E-88    |
| ENSDARG00000042826 | egr2b             | 0.320434482 | -1.641898691 | 3.81E-16    | 2.63E-15    |
| ENSDARG00000096641 | si:ch73-115f13.1  | 0.320326847 | -1.642383377 | 2.27E-11    | 1.15E-10    |
| ENSDARG00000079245 | si:dkey-73p2.2    | 0.31973068  | -1.64507091  | 1.10E-15    | 7.37E-15    |
| ENSDARG00000074056 | kctd1             | 0.319214958 | -1.647399839 | 2.55E-28    | 3.24E-27    |
| ENSDARG00000005586 | zbtb20            | 0.319016313 | -1.648297895 | 6.44E-08    | 2.48E-07    |
| ENSDARG00000070781 | cx35b             | 0.318977168 | -1.648474935 | 7.57E-18    | 5.78E-17    |
| ENSDARG00000056774 | gpr37l1b          | 0.318864904 | -1.648982781 | 2.86E-56    | 1.03E-54    |
| ENSDARG00000018383 | frzb              | 0.318746226 | -1.649519836 | 5.78E-52    | 1.82E-50    |
| ENSDARG00000079822 | BSN (2 of 3)      | 0.318479109 | -1.650729353 | 1.20E-112   | 1.65E-110   |

|                     |                    |             |              |             |             |
|---------------------|--------------------|-------------|--------------|-------------|-------------|
| ENSDARG00000060638  | CLSTN2 (2 of 2)    | 0.317774535 | -1.653924578 | 2.65E-14    | 1.64E-13    |
| ENSDARG00000002635  | FAM184A (1 of 2)   | 0.317556121 | -1.654916515 | 6.14E-82    | 4.26E-80    |
| ENSDARG000000025478 | GIPR               | 0.317550175 | -1.654943528 | 4.08E-06    | 1.33E-05    |
| ENSDARG000000027618 | grip2b             | 0.317286151 | -1.656143542 | 1.80E-07    | 6.71E-07    |
| ENSDARG000000042090 | PLA2G4C (3 of 5)   | 0.317078348 | -1.657088731 | 0.002739672 | 0.006357067 |
| ENSDARG000000022739 | rxfp3.2a           | 0.317071665 | -1.657119135 | 5.93E-05    | 0.000171681 |
| ENSDARG000000037478 | CDH8               | 0.316250234 | -1.660861546 | 4.50E-86    | 3.37E-84    |
| ENSDARG000000010244 | rpl22l1            | 0.31623922  | -1.660911792 | 8.18E-94    | 7.62E-92    |
| ENSDARG000000041176 | scn2b              | 0.315529143 | -1.664154834 | 2.03E-58    | 7.73E-57    |
| ENSDARG000000088587 | PCDHGC5 (21 of 31) | 0.315059679 | -1.666302964 | 4.69E-05    | 0.000137364 |
| ENSDARG000000086877 | mhc1zaa            | 0.314974657 | -1.666692341 | 3.86E-29    | 5.08E-28    |
| ENSDARG000000063524 | ano2               | 0.314846246 | -1.667280629 | 2.11E-34    | 3.44E-33    |
| ENSDARG000000076702 | PSD (1 of 3)       | 0.31466848  | -1.668095421 | 8.50E-17    | 6.14E-16    |
| ENSDARG000000068683 | chmp2ba            | 0.314603104 | -1.66839519  | 2.35E-12    | 1.27E-11    |
| ENSDARG000000074033 | adamtsl2           | 0.314589022 | -1.668459768 | 1.55E-15    | 1.03E-14    |
| ENSDARG000000061909 | PCDH10 (2 of 2)    | 0.31458249  | -1.668489723 | 3.16E-66    | 1.48E-64    |
| ENSDARG000000030614 | syt1a              | 0.31455901  | -1.668597408 | 9.42E-109   | 1.19E-106   |
| ENSDARG000000027963 | camkva             | 0.314522663 | -1.668764121 | 7.92E-39    | 1.56E-37    |
| ENSDARG000000093342 | si:ch211-13f8.1    | 0.314152928 | -1.670461069 | 1.49E-09    | 6.57E-09    |
| ENSDARG000000076730 | syt6a              | 0.313944791 | -1.671417219 | 2.30E-32    | 3.47E-31    |
| ENSDARG000000027564 |                    | 0.31387302  | -1.671747072 | 3.23E-16    | 2.23E-15    |
| ENSDARG000000093317 | si:ch211-209j10.6  | 0.313813389 | -1.672021186 | 6.48E-18    | 4.96E-17    |
| ENSDARG000000091614 | CR848032.2         | 0.3134633   | -1.673631549 | 2.02E-06    | 6.79E-06    |
| ENSDARG000000041787 | cx32.3             | 0.3132003   | -1.6748425   | 1.99E-15    | 1.32E-14    |
| ENSDARG000000086375 | DGKQ               | 0.313184    | -1.674917583 | 0.000250893 | 0.00066971  |
| ENSDARG000000096324 | si:ch211-155d24.7  | 0.313064831 | -1.675466647 | 1.91E-08    | 7.74E-08    |
| ENSDARG000000086799 | MDGA2 (2 of 2)     | 0.312574097 | -1.677729868 | 0.00065022  | 0.001645706 |
| ENSDARG000000089429 | si:dkey-205h13.2   | 0.311749334 | -1.681541617 | 2.37E-110   | 3.09E-108   |
| ENSDARG000000069590 | tmem150c           | 0.311728514 | -1.681637972 | 1.24E-29    | 1.66E-28    |
| ENSDARG000000087343 | hs3st1l1           | 0.311594865 | -1.682256638 | 7.46E-20    | 6.40E-19    |

|                    |                   |             |              |             |             |
|--------------------|-------------------|-------------|--------------|-------------|-------------|
| ENSDARG00000063014 | dbpa              | 0.311378645 | -1.683258088 | 1.78E-41    | 3.87E-40    |
| ENSDARG00000094003 | serp2             | 0.311071889 | -1.684680068 | 3.10E-24    | 3.30E-23    |
| ENSDARG00000055578 | rtn4rl1b          | 0.311066337 | -1.684705816 | 5.03E-13    | 2.84E-12    |
| ENSDARG00000062934 | gpr12             | 0.311019835 | -1.684921504 | 4.09E-26    | 4.75E-25    |
| ENSDARG00000088143 | SEMA4G (2 of 2)   | 0.31075382  | -1.68615597  | 1.25E-06    | 4.29E-06    |
| ENSDARG00000036998 | arf3b             | 0.310677786 | -1.686509003 | 8.76E-63    | 3.73E-61    |
| ENSDARG00000041926 | DLG4 (2 of 2)     | 0.310419717 | -1.687707898 | 5.23E-24    | 5.51E-23    |
| ENSDARG00000011635 | SCX (1 of 2)      | 0.310177954 | -1.688831944 | 7.65E-07    | 2.69E-06    |
| ENSDARG00000057468 | kcnc2             | 0.31016024  | -1.688914338 | 4.55E-20    | 3.94E-19    |
| ENSDARG00000088268 | OTOS              | 0.309964155 | -1.689826706 | 1.70E-34    | 2.77E-33    |
| ENSDARG00000038655 | ajap1             | 0.309548854 | -1.691760979 | 1.29E-54    | 4.46E-53    |
| ENSDARG00000010690 | CU138503.2        | 0.309411406 | -1.692401716 | 0.000416474 | 0.001082544 |
| ENSDARG00000079805 | tagln3a           | 0.309175805 | -1.693500669 | 9.47E-16    | 6.39E-15    |
| ENSDARG00000017254 | kcnk1b            | 0.308997232 | -1.694334182 | 6.68E-13    | 3.74E-12    |
| ENSDARG00000040633 | CABZ01016567.1    | 0.30892137  | -1.694688422 | 2.05E-38    | 3.94E-37    |
| ENSDARG00000077708 | snx8b             | 0.30884677  | -1.695036854 | 0.000258248 | 0.00068859  |
| ENSDARG00000077349 | SORCS3 (2 of 2)   | 0.308320717 | -1.697496265 | 7.44E-21    | 6.72E-20    |
| ENSDARG00000021607 | negr1             | 0.307734397 | -1.700242386 | 1.22E-114   | 1.74E-112   |
| ENSDARG00000090727 | celf5b            | 0.307649593 | -1.700640013 | 3.30E-09    | 1.41E-08    |
| ENSDARG00000079285 | pcdh1g32          | 0.307623593 | -1.700761943 | 1.70E-72    | 9.27E-71    |
| ENSDARG00000044638 | map1lc3c          | 0.307589766 | -1.700920593 | 0.000158665 | 0.000435823 |
| ENSDARG00000077920 | CR352286.1        | 0.30698096  | -1.703778915 | 6.99E-12    | 3.66E-11    |
| ENSDARG00000055525 | lgalslb           | 0.306728672 | -1.704965063 | 1.58E-34    | 2.59E-33    |
| ENSDARG00000087583 | si:ch211-226h8.13 | 0.306581677 | -1.705656616 | 0.002115775 | 0.004985942 |
| ENSDARG00000025672 | antxr1a           | 0.30618261  | -1.707535748 | 4.29E-10    | 1.98E-09    |
| ENSDARG00000015349 | mfg8a             | 0.30615391  | -1.707670989 | 4.35E-88    | 3.38E-86    |
| ENSDARG00000088380 | pcdh2ab12         | 0.30593656  | -1.708695571 | 0.005594425 | 0.012389274 |
| ENSDARG00000011519 | myl4              | 0.305711718 | -1.709756243 | 1.72E-77    | 1.07E-75    |
| ENSDARG00000011671 | pde6b             | 0.305668576 | -1.709959852 | 4.57E-16    | 3.13E-15    |
| ENSDARG00000061031 | dner              | 0.305655506 | -1.710021541 | 2.76E-52    | 8.78E-51    |

|                    |                      |             |              |             |             |
|--------------------|----------------------|-------------|--------------|-------------|-------------|
| ENSDARG00000053201 | zgc:172323           | 0.305457073 | -1.710958446 | 5.41E-08    | 2.10E-07    |
| ENSDARG00000058799 | mybpha               | 0.305243837 | -1.711965929 | 3.62E-42    | 8.12E-41    |
| ENSDARG00000083622 | dre-mir-124-6        | 0.305070455 | -1.712785629 | 8.87E-06    | 2.80E-05    |
| ENSDARG00000094660 | si:ch211-218d20.15   | 0.304988397 | -1.713173738 | 2.98E-23    | 3.05E-22    |
| ENSDARG00000087624 | LRRC2                | 0.304664493 | -1.714706722 | 1.77E-14    | 1.10E-13    |
| ENSDARG00000031161 | nr1d4a               | 0.304563373 | -1.71518564  | 6.93E-06    | 2.21E-05    |
| ENSDARG00000062693 | nrxn3b               | 0.30453934  | -1.715299489 | 4.55E-98    | 4.65E-96    |
| ENSDARG00000097196 | si:ch211-145n14.3    | 0.304529567 | -1.715345789 | 2.29E-71    | 1.21E-69    |
| ENSDARG00000055843 | cdh10                | 0.304522326 | -1.715380093 | 3.85E-57    | 1.42E-55    |
| ENSDARG00000076707 | pcdh2g29             | 0.304319683 | -1.716340448 | 1.97E-12    | 1.07E-11    |
| ENSDARG00000056572 |                      | 0.304164317 | -1.717077181 | 1.14E-25    | 1.29E-24    |
| ENSDARG00000086155 |                      | 0.303868331 | -1.718481771 | 4.20E-06    | 1.37E-05    |
| ENSDARG00000096721 | si:rp71-1c10.11      | 0.303631289 | -1.719607627 | 2.52E-23    | 2.58E-22    |
| ENSDARG00000071462 | lama3                | 0.303069903 | -1.722277507 | 1.29E-30    | 1.81E-29    |
| ENSDARG00000045568 | bcat1                | 0.302843764 | -1.723354391 | 6.11E-70    | 3.10E-68    |
| ENSDARG00000052787 | zdhhc12b             | 0.302650137 | -1.724277092 | 5.12E-25    | 5.65E-24    |
| ENSDARG00000070907 | lcor                 | 0.302546837 | -1.724769593 | 3.86E-55    | 1.36E-53    |
| ENSDARG00000055669 | NCAM2 (2 of 2)       | 0.30252144  | -1.724890703 | 7.50E-21    | 6.77E-20    |
| ENSDARG00000002732 | spon2b               | 0.302367153 | -1.72562667  | 2.97E-54    | 1.01E-52    |
| ENSDARG00000086479 | khdrbs3              | 0.302358327 | -1.725668783 | 8.22E-119   | 1.29E-116   |
| ENSDARG00000087260 | MTSS1L (2 of 2)      | 0.302271326 | -1.726083968 | 1.20E-24    | 1.29E-23    |
| ENSDARG00000093608 | si:dkey-25o1.6       | 0.301997129 | -1.727393263 | 3.44E-11    | 1.72E-10    |
| ENSDARG00000088300 | VSTM2A (2 of 2)      | 0.301994687 | -1.727404924 | 0.002746072 | 0.006369317 |
| ENSDARG00000054055 | ostn                 | 0.301984211 | -1.727454974 | 9.91E-05    | 0.000279836 |
| ENSDARG00000090106 | SLC17A7 (2 of 2)     | 0.301953386 | -1.727602245 | 2.46E-29    | 3.26E-28    |
| ENSDARG00000070229 | C11H1orf116 (1 of 2) | 0.301904359 | -1.727836508 | 0.001710954 | 0.004086094 |
| ENSDARG00000077996 |                      | 0.301696528 | -1.728830003 | 9.19E-39    | 1.80E-37    |
| ENSDARG00000028048 | rdh8a                | 0.301634171 | -1.729128218 | 1.02E-81    | 7.05E-80    |
| ENSDARG00000002644 | rgs5a                | 0.301603322 | -1.729275774 | 9.25E-82    | 6.39E-80    |
| ENSDARG00000002230 | sypb                 | 0.301181165 | -1.731296544 | 7.00E-131   | 1.33E-128   |



|                    |                   |             |              |             |             |
|--------------------|-------------------|-------------|--------------|-------------|-------------|
| ENSDARG00000017444 | hal               | 0.301004289 | -1.732144052 | 4.79E-53    | 1.56E-51    |
| ENSDARG00000087406 | CABZ01060681.1    | 0.300920199 | -1.732547146 | 1.65E-06    | 5.59E-06    |
| ENSDARG00000052896 | Irit1b            | 0.300751392 | -1.733356681 | 6.76E-24    | 7.09E-23    |
| ENSDARG00000089538 | RNF166 (2 of 2)   | 0.300501083 | -1.734557904 | 2.09E-10    | 9.86E-10    |
| ENSDARG00000057439 | PHF1              | 0.300458346 | -1.734763098 | 1.28E-06    | 4.39E-06    |
| ENSDARG00000091607 | ARHGEF28 (2 of 2) | 0.300417223 | -1.734960571 | 8.66E-06    | 2.73E-05    |
| ENSDARG00000089101 | plrdgb            | 0.299865081 | -1.737614563 | 1.54E-07    | 5.76E-07    |
| ENSDARG00000058045 | tlr21             | 0.299858922 | -1.737644194 | 0.000528909 | 0.001355207 |
| ENSDARG00000090348 | pcdh2ab5          | 0.299738639 | -1.738223022 | 7.76E-05    | 0.00022176  |
| ENSDARG00000053665 | gabrg2            | 0.299708829 | -1.738366511 | 2.98E-94    | 2.80E-92    |
| ENSDARG00000042390 | syndig1l          | 0.29946433  | -1.739543923 | 4.45E-32    | 6.62E-31    |
| ENSDARG00000056347 | rab3aa            | 0.299462732 | -1.739551623 | 1.91E-92    | 1.69E-90    |
| ENSDARG00000071230 | LRFN5 (1 of 2)    | 0.299457051 | -1.739578995 | 3.59E-38    | 6.81E-37    |
| ENSDARG00000069495 | tmem179b          | 0.299446409 | -1.739630263 | 1.21E-17    | 9.14E-17    |
| ENSDARG00000020231 | mapre3a           | 0.299315843 | -1.740259451 | 2.29E-64    | 1.01E-62    |
| ENSDARG00000011257 | enpp2             | 0.298943881 | -1.742053415 | 2.55E-08    | 1.02E-07    |
| ENSDARG00000062659 | CABZ01053721.1    | 0.298628323 | -1.743577093 | 0.00215434  | 0.005071756 |
| ENSDARG00000092469 | FNDC7 (6 of 8)    | 0.298519042 | -1.744105133 | 4.39E-09    | 1.87E-08    |
| ENSDARG00000002760 | gdf5              | 0.298307389 | -1.74512838  | 5.67E-45    | 1.43E-43    |
| ENSDARG00000091919 | radil             | 0.297847264 | -1.747355389 | 1.22E-10    | 5.85E-10    |
| ENSDARG00000087190 | MUC4              | 0.297666009 | -1.748233608 | 4.40E-09    | 1.87E-08    |
| ENSDARG00000057527 | MEF2A (2 of 2)    | 0.297061029 | -1.751168743 | 3.34E-12    | 1.78E-11    |
| ENSDARG00000040177 | rgs16             | 0.29667312  | -1.753053875 | 5.85E-17    | 4.26E-16    |
| ENSDARG00000038862 | kcnb2             | 0.296506567 | -1.753864039 | 6.92E-38    | 1.30E-36    |
| ENSDARG00000045087 | cdk5r1b           | 0.296064334 | -1.756017393 | 1.01E-133   | 2.07E-131   |
| ENSDARG00000062633 | cadm2b            | 0.295913189 | -1.756754095 | 1.13E-25    | 1.28E-24    |
| ENSDARG00000054667 | adra2db           | 0.295376128 | -1.759374863 | 9.84E-05    | 0.000277828 |
| ENSDARG00000046021 | PI16              | 0.295269862 | -1.759893987 | 0.002157071 | 0.005076102 |
| ENSDARG00000079719 | abhd8a            | 0.295112274 | -1.760664171 | 2.23E-16    | 1.56E-15    |
| ENSDARG00000062610 | pcdh1g32          | 0.294700914 | -1.762676562 | 2.10E-12    | 1.13E-11    |

|                    |                  |             |              |             |             |
|--------------------|------------------|-------------|--------------|-------------|-------------|
| ENSDARG00000089734 | CABZ01065246.2   | 0.294411917 | -1.764092026 | 1.56E-09    | 6.89E-09    |
| ENSDARG00000025206 | syt2a            | 0.2941358   | -1.765445705 | 4.75E-67    | 2.26E-65    |
| ENSDARG00000063483 | RNF122           | 0.293948073 | -1.766366775 | 1.13E-50    | 3.40E-49    |
| ENSDARG00000044514 | st6gal1          | 0.293742666 | -1.767375265 | 3.64E-82    | 2.55E-80    |
| ENSDARG00000089358 | CABZ01035189.1   | 0.293552843 | -1.768307865 | 9.55E-37    | 1.71E-35    |
| ENSDARG00000034424 | atp1b2b          | 0.293418646 | -1.768967542 | 3.29E-79    | 2.15E-77    |
| ENSDARG00000088181 | MPPED1           | 0.293166232 | -1.770209156 | 2.02E-13    | 1.17E-12    |
| ENSDARG00000001559 | csmd2            | 0.29293249  | -1.771359879 | 8.33E-84    | 6.00E-82    |
| ENSDARG00000070680 | cdh4             | 0.292701287 | -1.772499004 | 1.10E-14    | 6.93E-14    |
| ENSDARG00000076997 | stxbp4           | 0.292589529 | -1.773049953 | 3.01E-15    | 1.97E-14    |
| ENSDARG00000018351 | hpda             | 0.292545514 | -1.773267001 | 1.03E-44    | 2.57E-43    |
| ENSDARG00000086531 | CABZ01071530.2   | 0.29250326  | -1.773475393 | 1.55E-07    | 5.79E-07    |
| ENSDARG00000015752 | zap70            | 0.292067624 | -1.77562565  | 0.000155788 | 0.000428499 |
| ENSDARG00000097187 | si:ch211-153 6.6 | 0.292049445 | -1.775715452 | 1.18E-23    | 1.22E-22    |
| ENSDARG00000096242 | si:ch211-76 23.4 | 0.292036502 | -1.77577939  | 5.89E-86    | 4.39E-84    |
| ENSDARG00000042383 | zbtb25           | 0.292025925 | -1.775831643 | 3.79E-59    | 1.48E-57    |
| ENSDARG00000069973 | samd12           | 0.291504761 | -1.778408648 | 0.00019541  | 0.000529288 |
| ENSDARG00000059891 |                  | 0.291478962 | -1.778536335 | 2.90E-07    | 1.06E-06    |
| ENSDARG00000077710 | nlgn1            | 0.291445514 | -1.778701899 | 2.38E-20    | 2.10E-19    |
| ENSDARG00000003259 | lox              | 0.291415034 | -1.778852787 | 4.80E-26    | 5.56E-25    |
| ENSDARG00000077187 | impg1a           | 0.291291908 | -1.779462468 | 3.56E-11    | 1.78E-10    |
| ENSDARG00000069196 | ebf1b            | 0.291222477 | -1.779806385 | 2.36E-27    | 2.89E-26    |
| ENSDARG00000087652 | tcf4             | 0.291164846 | -1.780091912 | 3.00E-32    | 4.49E-31    |
| ENSDARG00000042397 | zgc:158340       | 0.291080632 | -1.780509249 | 7.59E-72    | 4.07E-70    |
| ENSDARG00000095509 | si:dkeyp-91h9.1  | 0.2909404   | -1.781204454 | 2.97E-05    | 8.87E-05    |
| ENSDARG00000038372 | cldn15 b         | 0.290651849 | -1.782636006 | 5.32E-19    | 4.34E-18    |
| ENSDARG00000069804 | RBBP6 (6 of 71)  | 0.290569974 | -1.783042466 | 0.003380512 | 0.007736648 |
| ENSDARG00000094766 | CCBL2 (4 of 4)   | 0.290075347 | -1.785500404 | 7.80E-05    | 0.000223045 |
| ENSDARG00000087086 | MGAT5B           | 0.28886566  | -1.791529385 | 4.40E-06    | 1.43E-05    |
| ENSDARG00000060458 | HRH4 (2 of 2)    | 0.288838066 | -1.791667205 | 0.000158734 | 0.000435927 |

|                    |                   |             |              |             |             |
|--------------------|-------------------|-------------|--------------|-------------|-------------|
| ENSDARG00000044129 | si:ch211-214p16.1 | 0.28876117  | -1.79205134  | 7.57E-07    | 2.66E-06    |
| ENSDARG00000068019 | sox8a             | 0.288457514 | -1.793569251 | 1.22E-21    | 1.14E-20    |
| ENSDARG00000040198 | fstl5             | 0.287909486 | -1.79631277  | 9.69E-127   | 1.68E-124   |
| ENSDARG00000038116 | gnrhr4            | 0.287844425 | -1.796638826 | 0.004378043 | 0.009851377 |
| ENSDARG00000002585 |                   | 0.287790283 | -1.796910215 | 1.66E-11    | 8.47E-11    |
| ENSDARG00000053559 | tspan3b           | 0.287113134 | -1.800308765 | 1.31E-59    | 5.16E-58    |
| ENSDARG00000093753 | si:ch211-133l5.5  | 0.287056396 | -1.800593894 | 1.18E-13    | 6.97E-13    |
| ENSDARG00000062343 | NETO2 (1 of 2)    | 0.286729413 | -1.80223819  | 3.88E-41    | 8.31E-40    |
| ENSDARG00000055014 | CR558302.2        | 0.286674864 | -1.80251268  | 4.34E-12    | 2.30E-11    |
| ENSDARG00000053424 | myl2b             | 0.286619099 | -1.802793349 | 2.49E-14    | 1.53E-13    |
| ENSDARG00000022820 | pde6g             | 0.286524368 | -1.803270255 | 1.69E-62    | 7.14E-61    |
| ENSDARG00000076981 | zgc:198329        | 0.286429898 | -1.803746002 | 2.25E-05    | 6.80E-05    |
| ENSDARG00000071493 | olfm3a            | 0.285402649 | -1.80892937  | 3.46E-42    | 7.77E-41    |
| ENSDARG00000059645 | ntrk2b            | 0.285334226 | -1.809275285 | 1.76E-38    | 3.41E-37    |
| ENSDARG00000042114 | BIN1 (1 of 2)     | 0.284637313 | -1.812803296 | 8.37E-58    | 3.13E-56    |
| ENSDARG00000045242 | smyhc3            | 0.28435532  | -1.814233298 | 3.28E-11    | 1.64E-10    |
| ENSDARG00000062305 | rims3             | 0.284315552 | -1.814435079 | 1.86E-14    | 1.15E-13    |
| ENSDARG00000077128 | galnt13           | 0.284274129 | -1.814645284 | 1.56E-42    | 3.56E-41    |
| ENSDARG00000090115 | HCN2 (2 of 2)     | 0.284267779 | -1.814677513 | 2.50E-12    | 1.35E-11    |
| ENSDARG00000077151 | cbln2b            | 0.284022988 | -1.815920392 | 2.77E-75    | 1.62E-73    |
| ENSDARG00000011171 | TENM2 (1 of 2)    | 0.283928849 | -1.81639865  | 1.55E-127   | 2.74E-125   |
| ENSDARG00000058462 | zgc:158846        | 0.28372278  | -1.817446106 | 2.83E-61    | 1.16E-59    |
| ENSDARG00000070624 | cacng7b           | 0.283645368 | -1.817839788 | 1.77E-05    | 5.42E-05    |
| ENSDARG00000045306 | slc51a            | 0.283478059 | -1.818691021 | 1.04E-15    | 6.99E-15    |
| ENSDARG00000094881 | si:ch211-197h24.8 | 0.283309941 | -1.81954687  | 1.12E-05    | 3.51E-05    |
| ENSDARG00000090676 |                   | 0.282229747 | -1.82505804  | 0.003268171 | 0.007500689 |
| ENSDARG00000023151 | ucp1              | 0.28209566  | -1.825743623 | 2.62E-143   | 5.92E-141   |
| ENSDARG00000009637 |                   | 0.281697018 | -1.827783801 | 4.07E-59    | 1.58E-57    |
| ENSDARG00000039647 | slc6a1b           | 0.281694577 | -1.827796303 | 5.33E-115   | 7.69E-113   |
| ENSDARG00000078665 |                   | 0.28162174  | -1.828169384 | 5.90E-11    | 2.90E-10    |

|                    |                  |             |              |             |             |
|--------------------|------------------|-------------|--------------|-------------|-------------|
| ENSDARG00000003970 | trim35-13        | 0.281548289 | -1.828545712 | 2.52E-21    | 2.33E-20    |
| ENSDARG00000020771 | tnr              | 0.281190789 | -1.830378759 | 5.88E-106   | 6.88E-104   |
| ENSDARG00000088161 | BAI2 (2 of 2)    | 0.28107972  | -1.830948726 | 7.53E-17    | 5.46E-16    |
| ENSDARG00000057000 | camkvl           | 0.280734507 | -1.832721691 | 1.22E-39    | 2.47E-38    |
| ENSDARG00000042970 | gng8             | 0.28055612  | -1.833638714 | 4.93E-16    | 3.37E-15    |
| ENSDARG00000094533 | si:dkey-246e1.3  | 0.279941518 | -1.836802629 | 6.05E-05    | 0.000174752 |
| ENSDARG00000077249 | gmip             | 0.279853293 | -1.837257369 | 1.08E-24    | 1.18E-23    |
| ENSDARG00000090196 | SYN3             | 0.279383237 | -1.839682634 | 5.68E-18    | 4.35E-17    |
| ENSDARG00000097209 | cox8b            | 0.279238051 | -1.84043255  | 8.07E-39    | 1.59E-37    |
| ENSDARG00000029230 | pnp4b            | 0.27922459  | -1.840502098 | 5.69E-42    | 1.26E-40    |
| ENSDARG00000091185 | si:ch73-313h21.1 | 0.279064306 | -1.841330488 | 0.000406078 | 0.001057165 |
| ENSDARG00000055730 | trim35-29        | 0.278987037 | -1.841730005 | 0.002694253 | 0.006256277 |
| ENSDARG00000021909 | VSTM2A (1 of 2)  | 0.27859832  | -1.843741539 | 6.80E-06    | 2.17E-05    |
| ENSDARG00000018266 | mthfd1a          | 0.278569664 | -1.843889939 | 8.55E-146   | 2.06E-143   |
| ENSDARG00000043460 | wu:fj39g12       | 0.277442951 | -1.849736947 | 7.78E-11    | 3.79E-10    |
| ENSDARG00000096712 | si:dkey-193p11.2 | 0.277401422 | -1.849952913 | 6.99E-29    | 9.09E-28    |
| ENSDARG00000044326 | BX950188.1       | 0.277311469 | -1.850420808 | 1.17E-08    | 4.83E-08    |
| ENSDARG00000019566 | neurod           | 0.277115615 | -1.851440089 | 3.08E-104   | 3.50E-102   |
| ENSDARG00000089326 | arhgap20         | 0.27701394  | -1.851969516 | 2.87E-38    | 5.48E-37    |
| ENSDARG00000079298 | CABZ01081359.1   | 0.276085898 | -1.856810896 | 1.58E-18    | 1.25E-17    |
| ENSDARG00000077563 | GJC1             | 0.276066309 | -1.856913264 | 2.71E-12    | 1.46E-11    |
| ENSDARG00000004721 | mpp5b            | 0.275693268 | -1.858864055 | 1.60E-06    | 5.46E-06    |
| ENSDARG00000062056 | elmod1           | 0.275660643 | -1.85903479  | 1.90E-109   | 2.43E-107   |
| ENSDARG00000074515 | GRIK2            | 0.275658984 | -1.859043474 | 3.76E-33    | 5.85E-32    |
| ENSDARG00000053678 | SLC4A3           | 0.275644426 | -1.859119665 | 8.84E-18    | 6.72E-17    |
| ENSDARG00000079779 | radil            | 0.275242087 | -1.861227008 | 2.28E-30    | 3.16E-29    |
| ENSDARG00000069518 | aqp3b            | 0.274680835 | -1.86417184  | 2.59E-08    | 1.04E-07    |
| ENSDARG00000052289 | CYGB (2 of 3)    | 0.274555338 | -1.864831133 | 2.66E-07    | 9.77E-07    |
| ENSDARG00000059945 | SV2A             | 0.274301502 | -1.866165574 | 6.37E-147   | 1.55E-144   |
| ENSDARG00000002300 | p2rx2            | 0.274269019 | -1.866336428 | 4.20E-09    | 1.79E-08    |

|                    |                   |             |              |             |             |
|--------------------|-------------------|-------------|--------------|-------------|-------------|
| ENSDARG00000068242 | cngb1a            | 0.274238296 | -1.866498047 | 0.000427761 | 0.00110975  |
| ENSDARG00000028469 | RPS6KA2           | 0.273767832 | -1.868975159 | 5.43E-10    | 2.48E-09    |
| ENSDARG00000093269 | si:ch73-62b13.1   | 0.27364841  | -1.869604619 | 8.07E-08    | 3.08E-07    |
| ENSDARG00000074285 | si:ch73-335m24.2  | 0.273546803 | -1.870140402 | 5.99E-07    | 2.13E-06    |
| ENSDARG00000094132 | igf1              | 0.273489641 | -1.870441908 | 2.22E-16    | 1.55E-15    |
| ENSDARG00000071905 | pcdh2ab3          | 0.273199609 | -1.871972675 | 7.02E-06    | 2.24E-05    |
| ENSDARG00000075928 | hivep3a           | 0.273135348 | -1.872312061 | 1.67E-86    | 1.27E-84    |
| ENSDARG00000018896 | mmp24             | 0.273093732 | -1.872531891 | 5.30E-121   | 8.46E-119   |
| ENSDARG00000034907 | paqr7b            | 0.273053617 | -1.872743826 | 5.54E-52    | 1.75E-50    |
| ENSDARG00000087224 | si:ch73-380n15.2  | 0.272556877 | -1.875370774 | 0.003326791 | 0.007624756 |
| ENSDARG00000023203 | si:ch211-147g22.1 | 0.271898059 | -1.878862241 | 0.004292765 | 0.009670207 |
| ENSDARG00000074707 | FUT9 (12 of 16)   | 0.271322425 | -1.8819198   | 4.58E-05    | 0.000134375 |
| ENSDARG00000068428 |                   | 0.271055353 | -1.883340596 | 1.98E-17    | 1.47E-16    |
| ENSDARG00000068551 | zgc:153394        | 0.271017951 | -1.883539682 | 3.34E-11    | 1.67E-10    |
| ENSDARG00000068240 | trim110           | 0.270378716 | -1.886946505 | 4.90E-06    | 1.58E-05    |
| ENSDARG00000074075 | antxr1b           | 0.269803573 | -1.890018641 | 1.29E-06    | 4.42E-06    |
| ENSDARG00000034011 | CABZ01072856.1    | 0.269794934 | -1.890064837 | 2.76E-52    | 8.78E-51    |
| ENSDARG00000019660 | rxfp2a            | 0.269602583 | -1.891093774 | 8.54E-06    | 2.70E-05    |
| ENSDARG00000092920 | si:ch211-106h4.12 | 0.268763999 | -1.895588195 | 2.06E-10    | 9.71E-10    |
| ENSDARG00000056742 | crmp1             | 0.268474395 | -1.897143593 | 6.56E-135   | 1.37E-132   |
| ENSDARG00000094217 | si:dkey-17e16.15  | 0.268337353 | -1.897880201 | 1.13E-12    | 6.21E-12    |
| ENSDARG00000038439 | fabp10a           | 0.26809696  | -1.899173232 | 2.07E-11    | 1.05E-10    |
| ENSDARG00000001910 | rorab             | 0.267815496 | -1.900688657 | 8.05E-154   | 2.18E-151   |
| ENSDARG00000075948 | slco4a1           | 0.267646386 | -1.901599923 | 8.76E-12    | 4.56E-11    |
| ENSDARG00000033954 | CABZ01020188.1    | 0.267642033 | -1.901623389 | 1.52E-09    | 6.73E-09    |
| ENSDARG00000095614 | CACNA1E (2 of 2)  | 0.267140033 | -1.904331904 | 5.88E-20    | 5.07E-19    |
| ENSDARG00000012948 | asb18             | 0.266879544 | -1.905739368 | 0.000405569 | 0.001055935 |
| ENSDARG00000031768 | roraa             | 0.266861982 | -1.905834306 | 9.64E-155   | 2.63E-152   |
| ENSDARG00000070511 | CR933820.2        | 0.266551402 | -1.907514323 | 1.71E-27    | 2.10E-26    |
| ENSDARG00000095002 | TNNC2 (2 of 2)    | 0.266441986 | -1.908106656 | 5.28E-23    | 5.31E-22    |

|                    |                  |             |              |            |             |
|--------------------|------------------|-------------|--------------|------------|-------------|
| ENSDARG00000075546 | CABZ01109624.1   | 0.266214422 | -1.909339367 | 9.21E-27   | 1.10E-25    |
| ENSDARG00000055175 | c1qtnf6a         | 0.266153457 | -1.909669792 | 1.12E-33   | 1.79E-32    |
| ENSDARG00000037448 | SLC2A13 (1 of 3) | 0.265661625 | -1.91233825  | 7.48E-05   | 0.00021435  |
| ENSDARG00000059466 | WASF3 (1 of 2)   | 0.265617836 | -1.912576069 | 7.07E-21   | 6.39E-20    |
| ENSDARG00000032865 | pacsin1a         | 0.265410989 | -1.913699988 | 1.04E-112  | 1.44E-110   |
| ENSDARG00000076932 | CT025934.1       | 0.26516428  | -1.915041648 | 2.89E-24   | 3.08E-23    |
| ENSDARG00000058353 | CSMD1            | 0.265102941 | -1.915375417 | 3.10E-12   | 1.66E-11    |
| ENSDARG00000060025 | nsmfa            | 0.26505224  | -1.91565136  | 4.86E-16   | 3.33E-15    |
| ENSDARG00000063133 | SLC4A10 (2 of 2) | 0.26500211  | -1.915924246 | 7.87E-153  | 2.07E-150   |
| ENSDARG00000074064 | rem2             | 0.264621695 | -1.917996748 | 2.21E-28   | 2.81E-27    |
| ENSDARG00000019179 | lrit1a           | 0.263700225 | -1.923029291 | 6.15E-08   | 2.37E-07    |
| ENSDARG00000092452 | si:dkey-95p16.1  | 0.263599151 | -1.923582373 | 8.63E-15   | 5.48E-14    |
| ENSDARG00000093021 | FAM163A (2 of 2) | 0.263297852 | -1.92523234  | 0.00049463 | 0.001272424 |
| ENSDARG00000070863 | cspg5b           | 0.262831237 | -1.927791349 | 6.97E-145  | 1.65E-142   |
| ENSDARG00000038974 | si:ch73-112n4.1  | 0.261730173 | -1.933847843 | 1.65E-133  | 3.33E-131   |
| ENSDARG00000069117 | kcnh5b           | 0.261510872 | -1.935057168 | 1.88E-10   | 8.87E-10    |
| ENSDARG00000087413 | BEAN1            | 0.260806131 | -1.938950308 | 3.50E-07   | 1.27E-06    |
| ENSDARG00000021352 | gria1a           | 0.260565822 | -1.940280235 | 2.76E-92   | 2.44E-90    |
| ENSDARG00000062821 | slc6a15          | 0.26055999  | -1.940312528 | 7.84E-115  | 1.12E-112   |
| ENSDARG00000024004 | cacna1da         | 0.259985026 | -1.94349956  | 4.25E-78   | 2.70E-76    |
| ENSDARG00000056651 | gfra4            | 0.259973187 | -1.943565262 | 5.88E-24   | 6.17E-23    |
| ENSDARG00000019492 | shbg             | 0.259266065 | -1.947494707 | 4.57E-05   | 0.000133933 |
| ENSDARG00000021150 | valopa           | 0.258578456 | -1.951326017 | 3.70E-08   | 1.46E-07    |
| ENSDARG00000068858 | il2rga           | 0.258356259 | -1.952566258 | 2.79E-05   | 8.36E-05    |
| ENSDARG00000031438 | kcnj11l          | 0.257714332 | -1.956155324 | 3.79E-107  | 4.62E-105   |
| ENSDARG00000045944 | slc6a1a          | 0.257345343 | -1.95822242  | 9.78E-163  | 2.93E-160   |
| ENSDARG00000075513 | ccdc136b         | 0.256911375 | -1.960657324 | 2.09E-18   | 1.64E-17    |
| ENSDARG00000063568 | SYT7 (1 of 2)    | 0.256876048 | -1.960855717 | 1.07E-16   | 7.66E-16    |
| ENSDARG00000087133 | BX005472.1       | 0.2566313   | -1.962230955 | 2.78E-07   | 1.02E-06    |
| ENSDARG00000026796 | grm1a            | 0.256116725 | -1.965126628 | 9.77E-68   | 4.74E-66    |

|                    |                   |             |              |             |             |
|--------------------|-------------------|-------------|--------------|-------------|-------------|
| ENSDARG00000017108 | KCNA1A            | 0.256079446 | -1.965336632 | 5.55E-05    | 0.000161239 |
| ENSDARG00000086391 | cald1             | 0.255938076 | -1.966133299 | 1.08E-48    | 3.04E-47    |
| ENSDARG00000028478 | si:ch211-173n18.3 | 0.255803574 | -1.966891676 | 5.67E-08    | 2.20E-07    |
| ENSDARG00000095214 | si:ch211-183d21.2 | 0.255618985 | -1.967933107 | 1.44E-10    | 6.89E-10    |
| ENSDARG00000089276 | TMEM235 (1 of 2)  | 0.255502709 | -1.968589505 | 0.000116706 | 0.000326117 |
| ENSDARG00000054817 | ppp1r14c          | 0.255427712 | -1.969013042 | 8.50E-138   | 1.79E-135   |
| ENSDARG00000006212 | MYT1L (1 of 2)    | 0.255267441 | -1.969918558 | 7.17E-61    | 2.90E-59    |
| ENSDARG00000057209 | lppr5a            | 0.255096049 | -1.970887543 | 4.58E-14    | 2.78E-13    |
| ENSDARG00000062712 | si:dkey-236e20.7  | 0.25499501  | -1.971459079 | 4.74E-09    | 2.01E-08    |
| ENSDARG00000097285 | ANPEP (7 of 7)    | 0.254894991 | -1.97202507  | 5.23E-23    | 5.27E-22    |
| ENSDARG00000037691 | pcdh2ab2          | 0.254747866 | -1.972858032 | 0.000141792 | 0.000391748 |
| ENSDARG00000091173 |                   | 0.254619007 | -1.973587978 | 1.71E-22    | 1.68E-21    |
| ENSDARG00000045205 | LRTM1             | 0.254365197 | -1.975026807 | 3.94E-05    | 0.000116443 |
| ENSDARG00000062640 | kcnh8             | 0.254333893 | -1.975204362 | 6.24E-16    | 4.24E-15    |
| ENSDARG00000008209 | myt1la            | 0.253976282 | -1.97723432  | 4.52E-165   | 1.41E-162   |
| ENSDARG00000063224 | nxph2a            | 0.253471234 | -1.980106068 | 5.53E-46    | 1.43E-44    |
| ENSDARG00000087188 | nfil3-6           | 0.253206242 | -1.981615127 | 4.75E-54    | 1.60E-52    |
| ENSDARG00000005739 | gpm6ba            | 0.253200519 | -1.981647731 | 1.24E-159   | 3.63E-157   |
| ENSDARG00000089972 | CR735107.1        | 0.253141872 | -1.981981935 | 2.76E-12    | 1.48E-11    |
| ENSDARG00000092987 | zmat4a            | 0.253022568 | -1.982662025 | 1.38E-23    | 1.43E-22    |
| ENSDARG00000097613 | IGFN1 (4 of 4)    | 0.252749399 | -1.984220431 | 2.05E-155   | 5.66E-153   |
| ENSDARG00000010619 | themis            | 0.252486191 | -1.985723608 | 1.19E-06    | 4.10E-06    |
| ENSDARG00000095094 | fxyd6             | 0.252372074 | -1.986375815 | 2.31E-38    | 4.43E-37    |
| ENSDARG00000042803 | rab3b             | 0.252318046 | -1.9866847   | 3.37E-38    | 6.40E-37    |
| ENSDARG00000054683 | prdm8b            | 0.25226724  | -1.986975228 | 2.10E-132   | 4.15E-130   |
| ENSDARG00000020102 | kctd16b           | 0.25189343  | -1.989114601 | 4.91E-07    | 1.76E-06    |
| ENSDARG00000045204 | CACNA2D3 (1 of 2) | 0.251879313 | -1.989195456 | 3.18E-12    | 1.70E-11    |
| ENSDARG00000093062 | si:ch73-370c12.1  | 0.251779024 | -1.98977     | 1.36E-06    | 4.66E-06    |
| ENSDARG00000076220 | sez6a             | 0.251718607 | -1.990116233 | 1.88E-51    | 5.79E-50    |
| ENSDARG00000086640 |                   | 0.251545903 | -1.9911064   | 4.67E-05    | 0.000136819 |

|                    |                  |             |              |             |             |
|--------------------|------------------|-------------|--------------|-------------|-------------|
| ENSDARG00000057338 | gstp2            | 0.251256035 | -1.992769844 | 3.87E-21    | 3.55E-20    |
| ENSDARG00000021405 | chd3             | 0.250830013 | -1.995218111 | 1.06E-143   | 2.44E-141   |
| ENSDARG00000053022 | purp             | 0.250471501 | -1.997281636 | 6.52E-35    | 1.09E-33    |
| ENSDARG00000070919 | cpne5            | 0.250313829 | -1.9981901   | 7.69E-20    | 6.59E-19    |
| ENSDARG00000060680 | si:ch73-127m5.1  | 0.249800016 | -2.001154526 | 1.17E-133   | 2.36E-131   |
| ENSDARG00000059391 | gyg1b            | 0.2497935   | -2.001192159 | 4.07E-121   | 6.53E-119   |
| ENSDARG00000042293 | ca4b             | 0.249233618 | -2.004429417 | 5.95E-08    | 2.30E-07    |
| ENSDARG00000057661 | aldoca           | 0.248958764 | -2.006021295 | 1.38E-06    | 4.72E-06    |
| ENSDARG00000006560 | irf4a            | 0.248449151 | -2.008977482 | 0.000365304 | 0.000956889 |
| ENSDARG00000001971 | cthrc1b          | 0.247918885 | -2.012059922 | 7.94E-07    | 2.79E-06    |
| ENSDARG00000097652 | si:dkey-234i14.2 | 0.247336836 | -2.015450975 | 3.18E-28    | 4.01E-27    |
| ENSDARG00000075321 | CABZ01071964.1   | 0.247145418 | -2.016567933 | 2.20E-11    | 1.11E-10    |
| ENSDARG00000089090 | mmd2b            | 0.246643133 | -2.019502975 | 3.80E-16    | 2.62E-15    |
| ENSDARG00000091404 | BX323836.1       | 0.245661769 | -2.025254739 | 0.000917533 | 0.002274461 |
| ENSDARG00000074415 |                  | 0.245241056 | -2.027727571 | 7.14E-17    | 5.18E-16    |
| ENSDARG00000039901 | SH3GL2 (2 of 2)  | 0.245239393 | -2.027737356 | 1.40E-27    | 1.73E-26    |
| ENSDARG00000067727 | BCL11B (2 of 2)  | 0.24476055  | -2.030557047 | 8.26E-119   | 1.29E-116   |
| ENSDARG00000034420 | irx6a            | 0.244684616 | -2.031004695 | 6.29E-56    | 2.26E-54    |
| ENSDARG00000090121 | CABZ01083267.1   | 0.244160793 | -2.03409654  | 0.00076748  | 0.001923643 |
| ENSDARG00000056004 | sprn             | 0.244104244 | -2.034430715 | 2.18E-60    | 8.71E-59    |
| ENSDARG00000018109 | mafga            | 0.244031937 | -2.034858127 | 1.47E-20    | 1.31E-19    |
| ENSDARG00000011184 | grk1b            | 0.24392033  | -2.035518089 | 4.04E-09    | 1.72E-08    |
| ENSDARG00000044632 | myo7ab           | 0.242359377 | -2.044780192 | 4.51E-48    | 1.25E-46    |
| ENSDARG00000077854 | BX119910.8       | 0.242068365 | -2.046513543 | 3.35E-13    | 1.92E-12    |
| ENSDARG00000097855 | si:ch211-3o3.9   | 0.241237892 | -2.051471564 | 1.51E-65    | 6.86E-64    |
| ENSDARG00000060095 | kcnb1            | 0.241095321 | -2.05232444  | 4.43E-18    | 3.42E-17    |
| ENSDARG00000056652 | SLC22A7 (3 of 5) | 0.240597453 | -2.055306726 | 0.000531215 | 0.00136038  |
| ENSDARG00000077096 | fndc7            | 0.240583524 | -2.055390247 | 1.51E-29    | 2.02E-28    |
| ENSDARG00000060578 |                  | 0.240472732 | -2.056054781 | 5.54E-16    | 3.77E-15    |
| ENSDARG00000056084 | igsf21b          | 0.240403416 | -2.056470701 | 1.41E-47    | 3.85E-46    |



|                    |                     |             |              |             |             |
|--------------------|---------------------|-------------|--------------|-------------|-------------|
| ENSDARG00000035891 | acana               | 0.240313541 | -2.05701015  | 1.35E-176   | 4.55E-174   |
| ENSDARG00000045560 | mybpc1              | 0.239299094 | -2.06311316  | 1.85E-93    | 1.67E-91    |
| ENSDARG00000089233 | CSGALNACT1 (2 of 2) | 0.238804513 | -2.066097991 | 7.12E-06    | 2.27E-05    |
| ENSDARG00000022668 | grapb               | 0.238776716 | -2.066265935 | 9.49E-06    | 2.98E-05    |
| ENSDARG00000053939 | tgfa                | 0.238700743 | -2.066725038 | 1.23E-22    | 1.22E-21    |
| ENSDARG00000075115 | PCDHGC4 (5 of 9)    | 0.238684685 | -2.066822097 | 4.61E-128   | 8.24E-126   |
| ENSDARG00000025089 | lox14               | 0.238366755 | -2.068745059 | 2.73E-51    | 8.37E-50    |
| ENSDARG00000086394 | RNF166 (1 of 2)     | 0.238320581 | -2.069024549 | 0.000537668 | 0.001375666 |
| ENSDARG00000089255 | si:ch211-286c4.6    | 0.237995356 | -2.070994671 | 1.39E-18    | 1.10E-17    |
| ENSDARG00000095347 | si:dkeyp-72h1.1     | 0.237582989 | -2.073496554 | 9.13E-25    | 9.97E-24    |
| ENSDARG00000078187 | slc12a5b            | 0.23736003  | -2.07485108  | 4.55E-77    | 2.80E-75    |
| ENSDARG00000038056 | fgfbp2b             | 0.237262099 | -2.075446437 | 2.06E-179   | 7.43E-177   |
| ENSDARG00000092039 | si:dkey-70p6.1      | 0.236621639 | -2.079346083 | 2.28E-91    | 1.96E-89    |
| ENSDARG00000074197 | ADAM23 (2 of 2)     | 0.236445152 | -2.080422533 | 6.51E-07    | 2.30E-06    |
| ENSDARG00000042586 | PCDH8 (2 of 2)      | 0.235974306 | -2.083298316 | 5.62E-79    | 3.63E-77    |
| ENSDARG00000004789 | lrp1ba              | 0.235807324 | -2.084319569 | 2.54E-38    | 4.85E-37    |
| ENSDARG00000096207 | SRR (2 of 2)        | 0.235486051 | -2.086286492 | 5.62E-10    | 2.56E-09    |
| ENSDARG00000077945 | HEPACAM (2 of 2)    | 0.234906027 | -2.089844365 | 0.001115509 | 0.002733974 |
| ENSDARG00000004753 | mylkb               | 0.234866813 | -2.09008522  | 8.62E-43    | 2.00E-41    |
| ENSDARG00000074348 | PCDHGC4 (4 of 9)    | 0.23440427  | -2.092929242 | 5.22E-96    | 5.12E-94    |
| ENSDARG00000056805 | PLCH2 (1 of 2)      | 0.234328215 | -2.093397416 | 1.03E-20    | 9.24E-20    |
| ENSDARG00000070011 | ASTL (9 of 9)       | 0.234313657 | -2.09348705  | 6.84E-08    | 2.63E-07    |
| ENSDARG00000096599 | si:ch211-160d14.9   | 0.234091015 | -2.094858536 | 8.11E-05    | 0.000231337 |
| ENSDARG00000089458 | rp11l               | 0.233775362 | -2.096805205 | 6.26E-46    | 1.62E-44    |
| ENSDARG00000097355 | si:dkey-86k10.2     | 0.233584032 | -2.097986439 | 3.80E-24    | 4.02E-23    |
| ENSDARG00000092534 | si:ch211-62a1.3     | 0.233529984 | -2.098320296 | 1.03E-08    | 4.26E-08    |
| ENSDARG00000070107 | six7                | 0.233383342 | -2.099226504 | 1.46E-152   | 3.79E-150   |
| ENSDARG00000053724 | ADCYAP1R1 (2 of 2)  | 0.233169225 | -2.100550707 | 6.05E-102   | 6.56E-100   |
| ENSDARG00000053987 | htr1b               | 0.233065678 | -2.101191528 | 5.61E-15    | 3.61E-14    |
| ENSDARG00000063544 | pip4k2ab            | 0.232196804 | -2.106579977 | 1.05E-66    | 4.95E-65    |

|                    |                   |             |              |             |             |
|--------------------|-------------------|-------------|--------------|-------------|-------------|
| ENSDARG00000010096 | slc1a6            | 0.23214575  | -2.106897226 | 1.12E-47    | 3.07E-46    |
| ENSDARG00000067509 | slc24a4b          | 0.231877843 | -2.108563126 | 1.38E-08    | 5.64E-08    |
| ENSDARG00000037646 | rgs11             | 0.231629003 | -2.110112188 | 3.20E-35    | 5.43E-34    |
| ENSDARG00000077275 | crispld1a         | 0.230913386 | -2.114576288 | 1.03E-38    | 2.01E-37    |
| ENSDARG00000027638 | adra1ab           | 0.230025274 | -2.120135711 | 3.94E-16    | 2.71E-15    |
| ENSDARG00000037487 | 1-Mar             | 0.229271156 | -2.12487323  | 8.28E-11    | 4.02E-10    |
| ENSDARG00000067507 | kctd8             | 0.228884137 | -2.127310616 | 2.18E-19    | 1.82E-18    |
| ENSDARG00000076310 | FBXO41 (1 of 2)   | 0.228529208 | -2.129549527 | 2.98E-45    | 7.56E-44    |
| ENSDARG00000005221 | desmb             | 0.228336805 | -2.130764671 | 3.06E-24    | 3.25E-23    |
| ENSDARG00000077504 | si:ch211-103n10.5 | 0.228036036 | -2.132666264 | 2.97E-13    | 1.71E-12    |
| ENSDARG00000011989 | crx               | 0.227692109 | -2.134843802 | 5.33E-188   | 2.16E-185   |
| ENSDARG00000087558 |                   | 0.227683316 | -2.134899517 | 2.98E-14    | 1.83E-13    |
| ENSDARG00000001881 | cacnb3a           | 0.227247982 | -2.137660614 | 2.71E-15    | 1.78E-14    |
| ENSDARG00000058248 | si:dkeyp-77h1.4   | 0.227141317 | -2.138337937 | 1.14E-42    | 2.62E-41    |
| ENSDARG00000062754 | cpne4             | 0.226866629 | -2.140083681 | 2.14E-11    | 1.09E-10    |
| ENSDARG00000088541 | tpbgl             | 0.226059325 | -2.145226664 | 2.67E-10    | 1.25E-09    |
| ENSDARG00000060846 | cabp7b            | 0.225916645 | -2.146137527 | 3.04E-16    | 2.11E-15    |
| ENSDARG00000029066 | rhcgb             | 0.225829825 | -2.146692065 | 2.09E-09    | 9.13E-09    |
| ENSDARG00000021369 | mc3r              | 0.225163668 | -2.15095404  | 0.000488402 | 0.001257769 |
| ENSDARG00000093357 | NYAP2 (2 of 2)    | 0.225047213 | -2.151700398 | 9.17E-127   | 1.60E-124   |
| ENSDARG00000009782 | myh11a            | 0.224423283 | -2.155705741 | 3.76E-147   | 9.22E-145   |
| ENSDARG00000088491 | CABZ01103847.1    | 0.224304515 | -2.156469432 | 3.15E-07    | 1.15E-06    |
| ENSDARG00000069737 | pou4f2            | 0.22361886  | -2.160886226 | 1.42E-187   | 5.70E-185   |
| ENSDARG00000042529 | gnat2             | 0.223614353 | -2.160915305 | 1.48E-93    | 1.35E-91    |
| ENSDARG00000087114 |                   | 0.222964562 | -2.165113671 | 2.47E-08    | 9.91E-08    |
| ENSDARG00000035997 | zfpm2b            | 0.222465353 | -2.16834743  | 6.83E-138   | 1.45E-135   |
| ENSDARG00000007382 | ubtd1a            | 0.222150667 | -2.17038962  | 1.04E-29    | 1.41E-28    |
| ENSDARG00000075815 | slc12a5a          | 0.222040947 | -2.171102344 | 9.47E-56    | 3.38E-54    |
| ENSDARG00000019063 | FAT1 (2 of 2)     | 0.222013543 | -2.171280409 | 4.96E-103   | 5.53E-101   |
| ENSDARG00000001976 | si:ch211-13k12.1  | 0.219858562 | -2.185352376 | 7.33E-36    | 1.28E-34    |

|                    |                   |             |              |             |             |
|--------------------|-------------------|-------------|--------------|-------------|-------------|
| ENSDARG00000087568 | CABZ01092745.1    | 0.219632641 | -2.186835619 | 0.000181133 | 0.000492539 |
| ENSDARG00000018935 | GABRB2 (1 of 2)   | 0.219267099 | -2.189238746 | 5.71E-09    | 2.41E-08    |
| ENSDARG00000077761 | nlgn4b            | 0.219123174 | -2.190186025 | 1.91E-31    | 2.77E-30    |
| ENSDARG00000074181 | LRRC24 (1 of 2)   | 0.218945327 | -2.191357438 | 4.09E-27    | 4.93E-26    |
| ENSDARG00000068989 | gabra1            | 0.218449377 | -2.194629102 | 1.07E-95    | 1.03E-93    |
| ENSDARG00000030749 | PHKA1 (2 of 2)    | 0.218374126 | -2.195126168 | 1.82E-50    | 5.45E-49    |
| ENSDARG00000009372 | diras1b           | 0.218024469 | -2.197438035 | 1.43E-10    | 6.81E-10    |
| ENSDARG00000097311 | si:dkey-201i2.1   | 0.21801966  | -2.197469856 | 5.73E-05    | 0.000166127 |
| ENSDARG00000088680 | HHLA2 (4 of 4)    | 0.218000863 | -2.197594246 | 2.76E-11    | 1.39E-10    |
| ENSDARG00000078527 | lingo4b           | 0.217878759 | -2.198402541 | 4.35E-79    | 2.82E-77    |
| ENSDARG00000070710 | si:dkeyp-41g9.6   | 0.217826521 | -2.198748481 | 2.05E-05    | 6.24E-05    |
| ENSDARG00000051892 | KCNG4 (1 of 2)    | 0.217704694 | -2.199555578 | 1.70E-06    | 5.77E-06    |
| ENSDARG00000037159 | opr1b             | 0.217631152 | -2.200043017 | 3.49E-10    | 1.62E-09    |
| ENSDARG00000055154 | slc8a4a           | 0.217551254 | -2.200572761 | 1.18E-74    | 6.84E-73    |
| ENSDARG00000074990 | BEND4             | 0.216964204 | -2.204471055 | 7.38E-08    | 2.83E-07    |
| ENSDARG00000089310 | gc                | 0.216963804 | -2.204473719 | 9.44E-10    | 4.25E-09    |
| ENSDARG00000053364 | pax6l             | 0.216819346 | -2.205434604 | 1.32E-66    | 6.21E-65    |
| ENSDARG00000003533 | col8a1b           | 0.216629502 | -2.206698361 | 2.12E-16    | 1.49E-15    |
| ENSDARG00000097875 | si:ch211-170a17.1 | 0.216430405 | -2.208024905 | 2.01E-16    | 1.41E-15    |
| ENSDARG00000071394 | foxq2             | 0.216356495 | -2.208517665 | 1.15E-14    | 7.25E-14    |
| ENSDARG00000024032 | coch              | 0.216259867 | -2.209162136 | 5.87E-17    | 4.28E-16    |
| ENSDARG00000074570 | FP016199.1        | 0.215975956 | -2.211057385 | 1.28E-12    | 7.04E-12    |
| ENSDARG00000054543 | samsn1a           | 0.215614065 | -2.213476801 | 5.42E-95    | 5.18E-93    |
| ENSDARG00000094702 | si:dkey-61n16.5   | 0.21522185  | -2.21610354  | 1.06E-13    | 6.27E-13    |
| ENSDARG00000091459 |                   | 0.21490893  | -2.218202662 | 6.63E-08    | 2.55E-07    |
| ENSDARG00000044475 | ompa              | 0.214549728 | -2.220616021 | 2.50E-19    | 2.08E-18    |
| ENSDARG00000015134 | CAMKK1 (1 of 2)   | 0.214228355 | -2.222778652 | 3.93E-07    | 1.42E-06    |
| ENSDARG00000056248 | wu:fb15e04        | 0.2138251   | -2.225496882 | 2.67E-42    | 6.05E-41    |
| ENSDARG00000003210 | ANO2 (1 of 2)     | 0.213035325 | -2.23083542  | 2.38E-100   | 2.51E-98    |
| ENSDARG00000068370 | ralgps1           | 0.212412492 | -2.235059479 | 2.01E-37    | 3.70E-36    |

|                    |                    |             |              |             |             |
|--------------------|--------------------|-------------|--------------|-------------|-------------|
| ENSDARG00000076660 | FOXO6 (2 of 2)     | 0.212326611 | -2.235642901 | 2.59E-12    | 1.40E-11    |
| ENSDARG00000088218 | CABZ01035080.1     | 0.212160987 | -2.236768701 | 0.000185888 | 0.000504984 |
| ENSDARG00000086931 | CABZ01029822.1     | 0.211877584 | -2.23869713  | 3.06E-26    | 3.57E-25    |
| ENSDARG00000057052 | dscaml1            | 0.211875171 | -2.238713562 | 6.37E-205   | 2.97E-202   |
| ENSDARG00000078134 | crygm2f            | 0.211513644 | -2.241177364 | 0.000121262 | 0.000338117 |
| ENSDARG00000075026 | mkxb               | 0.211431801 | -2.241735706 | 7.58E-10    | 3.43E-09    |
| ENSDARG00000076706 | CABZ01038708.1     | 0.211275896 | -2.242799912 | 0.000509993 | 0.00130981  |
| ENSDARG00000088634 | adcy1b             | 0.210852801 | -2.245691907 | 2.81E-17    | 2.08E-16    |
| ENSDARG00000017532 | KIF25              | 0.210601487 | -2.247412469 | 6.76E-21    | 6.12E-20    |
| ENSDARG00000002696 | gnb3b              | 0.210290546 | -2.249544105 | 1.40E-75    | 8.31E-74    |
| ENSDARG00000043349 | MYL2 (1 of 2)      | 0.209707773 | -2.253547756 | 2.73E-56    | 9.87E-55    |
| ENSDARG00000031013 | C1QL1 (2 of 2)     | 0.209688031 | -2.253683582 | 0.000581007 | 0.001479623 |
| ENSDARG00000076583 | pcdh2aa1           | 0.209488902 | -2.255054277 | 2.62E-13    | 1.51E-12    |
| ENSDARG00000097986 | si:zfos-411a11.3   | 0.208939659 | -2.258841739 | 2.56E-32    | 3.84E-31    |
| ENSDARG00000016491 | aglb               | 0.208189675 | -2.264029576 | 2.39E-179   | 8.49E-177   |
| ENSDARG00000015592 | c1ql2              | 0.207823237 | -2.266571124 | 6.74E-06    | 2.15E-05    |
| ENSDARG00000010555 | pdha1b             | 0.207799597 | -2.266735238 | 5.56E-07    | 1.98E-06    |
| ENSDARG00000086969 | CR774179.1         | 0.206801088 | -2.273684321 | 2.73E-10    | 1.27E-09    |
| ENSDARG00000095011 | si:ch211-67n3.9    | 0.206234558 | -2.277641992 | 4.47E-08    | 1.75E-07    |
| ENSDARG00000056292 | vsx1               | 0.206127869 | -2.278388519 | 3.20E-209   | 1.52E-206   |
| ENSDARG00000078868 | tmem74b            | 0.205746531 | -2.28105999  | 3.64E-23    | 3.70E-22    |
| ENSDARG00000077023 | pcdhb              | 0.205323884 | -2.284026641 | 8.62E-11    | 4.18E-10    |
| ENSDARG00000037286 |                    | 0.20449641  | -2.289852577 | 3.32E-32    | 4.96E-31    |
| ENSDARG00000078132 | si:dkey-7e14.7     | 0.203549227 | -2.296550355 | 8.94E-24    | 9.33E-23    |
| ENSDARG00000078514 | CCDC50 (1 of 2)    | 0.203313734 | -2.298220418 | 2.44E-06    | 8.17E-06    |
| ENSDARG00000067815 | LINGO3 (2 of 2)    | 0.203295904 | -2.298346948 | 3.79E-10    | 1.75E-09    |
| ENSDARG00000070543 | grin2ab            | 0.20316531  | -2.299274006 | 6.92E-89    | 5.51E-87    |
| ENSDARG00000092985 | si:ch1073-309n14.1 | 0.201634796 | -2.310183471 | 2.31E-21    | 2.14E-20    |
| ENSDARG00000020794 | neurod6b           | 0.201159634 | -2.313587259 | 3.33E-185   | 1.28E-182   |
| ENSDARG00000093893 | CCBL2 (3 of 4)     | 0.200758822 | -2.316464706 | 0.000333132 | 0.000876577 |

|                    |                  |             |              |             |             |
|--------------------|------------------|-------------|--------------|-------------|-------------|
| ENSDARG00000077893 | ELFN2 (2 of 2)   | 0.200590237 | -2.317676705 | 4.50E-18    | 3.47E-17    |
| ENSDARG00000045180 | acta2            | 0.200266931 | -2.320003877 | 7.50E-139   | 1.63E-136   |
| ENSDARG00000090815 | KCNJ10A          | 0.199819243 | -2.323232568 | 1.49E-27    | 1.84E-26    |
| ENSDARG00000035137 | EHD2 (1 of 2)    | 0.199140651 | -2.32814034  | 0.000164719 | 0.0004511   |
| ENSDARG00000062357 | fam19a1          | 0.199137633 | -2.328162205 | 2.41E-21    | 2.23E-20    |
| ENSDARG00000037507 | kctd12b          | 0.199088459 | -2.328518505 | 2.63E-17    | 1.95E-16    |
| ENSDARG00000012504 | rlbp1a           | 0.198670749 | -2.331548619 | 2.16E-145   | 5.16E-143   |
| ENSDARG00000056411 | adipoqb          | 0.198337364 | -2.333971605 | 8.18E-05    | 0.000233152 |
| ENSDARG00000036186 | mbpa             | 0.198315165 | -2.334133091 | 2.99E-47    | 8.06E-46    |
| ENSDARG00000094908 | lingo4a          | 0.198178877 | -2.335124894 | 3.87E-06    | 1.27E-05    |
| ENSDARG00000004643 | cdhr1a           | 0.197681597 | -2.338749522 | 7.60E-39    | 1.49E-37    |
| ENSDARG00000022951 | pth2             | 0.197297063 | -2.341558614 | 6.14E-05    | 0.000177251 |
| ENSDARG00000041115 | cnfn             | 0.196544172 | -2.347074507 | 0.000166207 | 0.000454824 |
| ENSDARG00000055577 | chrn2a           | 0.196511311 | -2.347315738 | 3.06E-27    | 3.71E-26    |
| ENSDARG00000021004 | c5               | 0.196229776 | -2.349384122 | 1.48E-221   | 7.62E-219   |
| ENSDARG00000093888 | si:dkeyp-87e3.1  | 0.195989606 | -2.351150946 | 1.34E-18    | 1.06E-17    |
| ENSDARG00000086619 | CR847851.2       | 0.195086028 | -2.357817639 | 4.64E-10    | 2.13E-09    |
| ENSDARG00000075058 | gabra6a          | 0.19444169  | -2.362590516 | 6.04E-06    | 1.94E-05    |
| ENSDARG00000095553 | lenep            | 0.194175534 | -2.36456666  | 1.40E-08    | 5.73E-08    |
| ENSDARG00000004445 | GRM5 (1 of 2)    | 0.193435576 | -2.370074941 | 4.31E-21    | 3.94E-20    |
| ENSDARG00000043961 | PCDH10           | 0.193149438 | -2.372210617 | 8.07E-90    | 6.54E-88    |
| ENSDARG00000090659 | SGCZ             | 0.192627156 | -2.376116993 | 5.22E-07    | 1.86E-06    |
| ENSDARG00000061466 | CPNE5 (1 of 2)   | 0.192353713 | -2.378166417 | 4.07E-29    | 5.34E-28    |
| ENSDARG00000021055 | isl1l            | 0.192335032 | -2.378306536 | 0.000682147 | 0.001722371 |
| ENSDARG00000097422 | si:ch73-145l22.4 | 0.191885175 | -2.381684838 | 0.000187676 | 0.000509549 |
| ENSDARG00000010420 | ndrg1b           | 0.19179804  | -2.382340115 | 4.16E-180   | 1.51E-177   |
| ENSDARG00000035798 | gngt1            | 0.191717884 | -2.382943174 | 8.02E-46    | 2.07E-44    |
| ENSDARG00000076852 | CABZ01113374.2   | 0.191367721 | -2.385580592 | 1.20E-25    | 1.36E-24    |
| ENSDARG00000088839 | BX248120.1       | 0.191000106 | -2.388354652 | 1.26E-08    | 5.19E-08    |
| ENSDARG00000094639 | si:ch211-223g7.1 | 0.190701806 | -2.390609591 | 0.000255283 | 0.000680961 |

|                    |                   |             |              |             |             |
|--------------------|-------------------|-------------|--------------|-------------|-------------|
| ENSDARG00000017634 | pdcb              | 0.190266451 | -2.393906894 | 2.42E-49    | 7.02E-48    |
| ENSDARG00000011983 | zgc:136908        | 0.189546369 | -2.399377277 | 1.33E-157   | 3.78E-155   |
| ENSDARG00000041735 | tmem237a          | 0.189021211 | -2.403379957 | 2.20E-20    | 1.94E-19    |
| ENSDARG00000037921 | gng13b            | 0.188098485 | -2.410439869 | 5.90E-231   | 3.28E-228   |
| ENSDARG00000078350 | lrrc24            | 0.187242545 | -2.417019819 | 5.26E-05    | 0.000153128 |
| ENSDARG00000056909 |                   | 0.187106639 | -2.418067347 | 1.08E-08    | 4.47E-08    |
| ENSDARG00000073695 | mamdc2b           | 0.185259272 | -2.432382343 | 8.71E-15    | 5.53E-14    |
| ENSDARG00000089059 | CABZ01063077.1    | 0.184549727 | -2.437918491 | 1.06E-05    | 3.32E-05    |
| ENSDARG00000044600 | CABZ01025393.1    | 0.184364563 | -2.439366719 | 5.40E-13    | 3.05E-12    |
| ENSDARG00000043953 | BX119910.1        | 0.182657571 | -2.452786543 | 1.26E-14    | 7.94E-14    |
| ENSDARG00000027495 | elovl4b           | 0.180117208 | -2.472992072 | 3.96E-187   | 1.56E-184   |
| ENSDARG00000077341 | ppp1r14c          | 0.179338183 | -2.479245413 | 4.13E-178   | 1.45E-175   |
| ENSDARG00000043847 | tmem244           | 0.178789284 | -2.483667827 | 1.42E-18    | 1.13E-17    |
| ENSDARG00000061576 | colm              | 0.178730109 | -2.484145406 | 4.92E-16    | 3.37E-15    |
| ENSDARG00000059381 | KCTD20            | 0.177431877 | -2.494662872 | 1.29E-43    | 3.09E-42    |
| ENSDARG00000098044 | si:ch211-136a13.3 | 0.176938674 | -2.498678678 | 1.79E-18    | 1.42E-17    |
| ENSDARG00000014745 | epd               | 0.176382555 | -2.503220212 | 1.75E-62    | 7.39E-61    |
| ENSDARG00000025728 | grin1b            | 0.176240942 | -2.504378986 | 3.27E-237   | 1.90E-234   |
| ENSDARG00000079773 | NOX5              | 0.176129776 | -2.505289271 | 4.33E-07    | 1.56E-06    |
| ENSDARG00000040928 | CABZ01059391.1    | 0.175539251 | -2.510134441 | 0.000217571 | 0.000585625 |
| ENSDARG00000020602 | grk7a             | 0.175346471 | -2.511719703 | 8.16E-46    | 2.10E-44    |
| ENSDARG00000013134 | CABZ01071407.1    | 0.175164833 | -2.513214934 | 5.35E-20    | 4.62E-19    |
| ENSDARG00000052138 | slc1a2a           | 0.174700122 | -2.517047483 | 6.02E-06    | 1.93E-05    |
| ENSDARG00000017398 | slc44a5a          | 0.174648555 | -2.517473388 | 1.85E-09    | 8.12E-09    |
| ENSDARG00000027153 | gabrr3a           | 0.174433389 | -2.51925188  | 3.88E-20    | 3.38E-19    |
| ENSDARG00000079078 | hbaa1             | 0.174335286 | -2.52006349  | 0.000160253 | 0.000439717 |
| ENSDARG00000023886 | cacna2d4b         | 0.173320682 | -2.528484278 | 1.07E-35    | 1.85E-34    |
| ENSDARG00000044935 | hpdb              | 0.173223194 | -2.529295982 | 3.69E-123   | 6.12E-121   |
| ENSDARG00000091428 |                   | 0.172759082 | -2.533166542 | 1.65E-15    | 1.09E-14    |
| ENSDARG00000087857 | si:ch211-180a12.2 | 0.172547743 | -2.534932491 | 1.59E-38    | 3.08E-37    |

|                    |                   |             |              |           |             |
|--------------------|-------------------|-------------|--------------|-----------|-------------|
| ENSDARG00000029482 | ush2a             | 0.171778218 | -2.541380981 | 7.86E-108 | 9.71E-106   |
| ENSDARG00000071488 | CABZ01041804.1    | 0.171722244 | -2.541851167 | 3.80E-100 | 3.99E-98    |
| ENSDARG00000092574 | si:ch211-198d23.1 | 0.171280655 | -2.545565875 | 8.07E-07  | 2.83E-06    |
| ENSDARG00000058410 | acbd5b            | 0.171081471 | -2.547244575 | 4.18E-08  | 1.64E-07    |
| ENSDARG00000094708 | sftpba            | 0.170845848 | -2.54923291  | 1.26E-10  | 6.03E-10    |
| ENSDARG00000074839 | impq1b            | 0.169032801 | -2.564624863 | 6.59E-35  | 1.10E-33    |
| ENSDARG00000052016 | cabp2a            | 0.168277966 | -2.571081806 | 4.38E-12  | 2.32E-11    |
| ENSDARG00000029898 | CNGA1 (2 of 2)    | 0.168120099 | -2.572435884 | 5.39E-10  | 2.46E-09    |
| ENSDARG00000007080 | rhcg1             | 0.167987552 | -2.573573761 | 8.46E-149 | 2.11E-146   |
| ENSDARG00000074887 | CT583723.1        | 0.167709748 | -2.575961548 | 1.53E-09  | 6.76E-09    |
| ENSDARG00000006503 | CABZ01067175.1    | 0.167361111 | -2.578963761 | 8.89E-07  | 3.10E-06    |
| ENSDARG00000074119 |                   | 0.166488697 | -2.586503863 | 4.68E-08  | 1.83E-07    |
| ENSDARG00000026248 | slc1a7b           | 0.166361088 | -2.58761007  | 1.54E-09  | 6.79E-09    |
| ENSDARG00000077858 | asip              | 0.166155745 | -2.589391917 | 9.07E-06  | 2.86E-05    |
| ENSDARG00000029321 |                   | 0.166150571 | -2.589436848 | 3.23E-07  | 1.18E-06    |
| ENSDARG00000006206 | pou4f3            | 0.165776483 | -2.592688733 | 3.23E-27  | 3.91E-26    |
| ENSDARG00000002771 | SLC4A5 (1 of 2)   | 0.165544929 | -2.594705275 | 2.84E-22  | 2.75E-21    |
| ENSDARG00000089523 | LRRC30 (2 of 2)   | 0.165363965 | -2.596283209 | 7.89E-14  | 4.71E-13    |
| ENSDARG00000088475 | pcdh1gb9          | 0.164632796 | -2.602676338 | 8.27E-10  | 3.73E-09    |
| ENSDARG00000096701 | si:dkey-21e13.3   | 0.164428094 | -2.604471281 | 4.75E-35  | 7.98E-34    |
| ENSDARG00000095865 | si:zfos-44h1.1    | 0.163888673 | -2.609211951 | 1.32E-05  | 4.09E-05    |
| ENSDARG00000014233 | sept8b            | 0.163716638 | -2.61072715  | 3.96E-40  | 8.18E-39    |
| ENSDARG00000021336 | pax4              | 0.163631534 | -2.61147729  | 1.69E-09  | 7.45E-09    |
| ENSDARG00000014697 | KCNJ10B           | 0.161518452 | -2.630229107 | 3.26E-09  | 1.40E-08    |
| ENSDARG00000078226 | CDH12 (2 of 2)    | 0.161435968 | -2.630966049 | 1.60E-34  | 2.62E-33    |
| ENSDARG00000038293 | zgc:103559        | 0.160540581 | -2.638990071 | 6.62E-05  | 0.000190522 |
| ENSDARG00000067585 | TPPP              | 0.159825008 | -2.64543493  | 1.32E-20  | 1.17E-19    |
| ENSDARG00000078736 | DOC2A             | 0.159759871 | -2.646023025 | 3.07E-18  | 2.40E-17    |
| ENSDARG00000071419 | asb10             | 0.15932007  | -2.65000008  | 4.85E-40  | 9.98E-39    |
| ENSDARG00000078411 | hspb15            | 0.158314299 | -2.659136529 | 3.55E-27  | 4.29E-26    |

|                    |                   |             |              |           |           |
|--------------------|-------------------|-------------|--------------|-----------|-----------|
| ENSDARG00000010680 | gngt2a            | 0.157745195 | -2.664332033 | 5.41E-58  | 2.03E-56  |
| ENSDARG00000035437 | MYH13 (3 of 11)   | 0.15759899  | -2.665669802 | 7.54E-79  | 4.86E-77  |
| ENSDARG00000011886 | pdca              | 0.157588864 | -2.6657625   | 1.76E-27  | 2.16E-26  |
| ENSDARG00000018478 | agxtb             | 0.156883361 | -2.672235747 | 4.15E-100 | 4.33E-98  |
| ENSDARG00000037587 | SYNPR (1 of 2)    | 0.156635618 | -2.674515785 | 1.46E-75  | 8.61E-74  |
| ENSDARG00000091627 | si:dkey-271j15.3  | 0.155904275 | -2.681267605 | 4.54E-11  | 2.25E-10  |
| ENSDARG00000094310 | si:ch211-255g12.6 | 0.155554135 | -2.684511349 | 2.54E-199 | 1.13E-196 |
| ENSDARG00000062319 | si:dkey-103g5.3   | 0.154798378 | -2.691537743 | 3.98E-176 | 1.33E-173 |
| ENSDARG00000043226 | nfixa             | 0.154772715 | -2.691776933 | 6.98E-111 | 9.18E-109 |
| ENSDARG00000075865 | CABZ01076351.1    | 0.154307333 | -2.696121475 | 6.53E-15  | 4.18E-14  |
| ENSDARG00000052664 | MSLN (1 of 2)     | 0.152528694 | -2.712847423 | 1.80E-20  | 1.60E-19  |
| ENSDARG00000078755 | lppr4b            | 0.152403246 | -2.714034462 | 3.43E-24  | 3.64E-23  |
| ENSDARG00000069469 | khdrbs2           | 0.152182724 | -2.716123503 | 1.66E-186 | 6.45E-184 |
| ENSDARG00000051981 | STX3 (2 of 2)     | 0.151837937 | -2.7193958   | 3.00E-101 | 3.22E-99  |
| ENSDARG00000014840 | prph2b            | 0.151080464 | -2.726610976 | 9.22E-29  | 1.20E-27  |
| ENSDARG00000075929 |                   | 0.15089233  | -2.728408621 | 1.95E-05  | 5.95E-05  |
| ENSDARG00000094605 |                   | 0.150772773 | -2.729552167 | 1.95E-05  | 5.93E-05  |
| ENSDARG00000010124 | sp5l              | 0.150445381 | -2.732688282 | 9.48E-44  | 2.30E-42  |
| ENSDARG00000075054 | RASGRF2 (2 of 2)  | 0.148588114 | -2.750609381 | 1.68E-47  | 4.58E-46  |
| ENSDARG00000075384 | enpp2             | 0.148256133 | -2.753836308 | 1.57E-65  | 7.13E-64  |
| ENSDARG00000090126 |                   | 0.147754607 | -2.75872498  | 3.77E-11  | 1.88E-10  |
| ENSDARG00000039964 | fgfbp2a           | 0.147552869 | -2.76069612  | 2.40E-45  | 6.10E-44  |
| ENSDARG00000026855 | cacna2d4a         | 0.147112484 | -2.765008417 | 1.07E-38  | 2.09E-37  |
| ENSDARG00000096398 | si:ch211-276a17.5 | 0.146997869 | -2.766132851 | 3.13E-20  | 2.73E-19  |
| ENSDARG00000003326 | cacng5a           | 0.146515161 | -2.770878133 | 2.06E-10  | 9.73E-10  |
| ENSDARG00000060893 | col8a2            | 0.144956194 | -2.786311118 | 1.95E-288 | 1.63E-285 |
| ENSDARG00000079519 | si:ch211-69e5.1   | 0.144531927 | -2.790539877 | 4.22E-08  | 1.66E-07  |
| ENSDARG00000045139 | ca7               | 0.143969612 | -2.796163767 | 2.54E-25  | 2.84E-24  |
| ENSDARG00000016412 | agt               | 0.142686507 | -2.80907918  | 2.36E-196 | 1.03E-193 |
| ENSDARG00000045677 | opn1sw1           | 0.140939929 | -2.826847701 | 2.08E-253 | 1.37E-250 |



|                    |                  |             |              |           |           |
|--------------------|------------------|-------------|--------------|-----------|-----------|
| ENSDARG00000023683 | cacna1f          | 0.140521278 | -2.831139491 | 1.60E-62  | 6.77E-61  |
| ENSDARG00000076644 | kcnv2a           | 0.139293132 | -2.843803964 | 3.88E-12  | 2.06E-11  |
| ENSDARG00000059342 | avil             | 0.139092745 | -2.845880922 | 5.92E-07  | 2.10E-06  |
| ENSDARG00000061000 | KLHDC8A          | 0.138925086 | -2.847620964 | 9.80E-35  | 1.62E-33  |
| ENSDARG00000086756 | RGS9BP           | 0.138792971 | -2.848993591 | 1.41E-44  | 3.51E-43  |
| ENSDARG00000052982 | gabrr2a          | 0.137746216 | -2.859915409 | 4.25E-11  | 2.11E-10  |
| ENSDARG00000069830 | CX55.5           | 0.137504719 | -2.862446969 | 2.14E-06  | 7.20E-06  |
| ENSDARG00000035163 | tmem136b         | 0.137199462 | -2.865653266 | 1.15E-06  | 3.97E-06  |
| ENSDARG00000070597 | prelp            | 0.136602444 | -2.871944796 | 8.01E-163 | 2.42E-160 |
| ENSDARG00000078965 | chd5             | 0.135499622 | -2.883639267 | 3.22E-25  | 3.58E-24  |
| ENSDARG00000041595 | ces3             | 0.135472469 | -2.883928406 | 2.66E-301 | 2.36E-298 |
| ENSDARG00000061149 | nrn1lb           | 0.134866694 | -2.890393986 | 2.13E-20  | 1.88E-19  |
| ENSDARG00000079569 | CR385022.1       | 0.134529645 | -2.894003973 | 2.91E-16  | 2.03E-15  |
| ENSDARG00000052700 | si:dkey-162b23.4 | 0.134086686 | -2.898762106 | 9.02E-248 | 5.82E-245 |
| ENSDARG00000091745 | CABZ01055591.1   | 0.133229013 | -2.908019802 | 3.19E-07  | 1.16E-06  |
| ENSDARG00000040123 | zfpm2a           | 0.133150619 | -2.908868964 | 1.66E-182 | 6.30E-180 |
| ENSDARG00000037925 | rgs9a            | 0.132877221 | -2.911834286 | 1.78E-21  | 1.66E-20  |
| ENSDARG00000092731 | mhc1uca          | 0.131926344 | -2.922195416 | 1.01E-13  | 6.00E-13  |
| ENSDARG00000041382 | si:dkey-283b15.2 | 0.13127457  | -2.929340628 | 3.50E-118 | 5.38E-116 |
| ENSDARG00000090089 | CABZ01015106.1   | 0.131261041 | -2.929489312 | 2.44E-34  | 3.97E-33  |
| ENSDARG00000093600 | omd              | 0.130555054 | -2.937269784 | 4.31E-16  | 2.96E-15  |
| ENSDARG00000075067 | AIPL1            | 0.130224257 | -2.94092989  | 1.89E-19  | 1.58E-18  |
| ENSDARG00000026840 | arhgap23b        | 0.128164984 | -2.963925934 | 7.53E-43  | 1.75E-41  |
| ENSDARG00000042387 |                  | 0.127758537 | -2.9685084   | 8.58E-11  | 4.16E-10  |
| ENSDARG00000017274 | opn1sw2          | 0.126941316 | -2.977766388 | 7.10E-157 | 2.00E-154 |
| ENSDARG00000057792 | cx52.7           | 0.126904441 | -2.978185541 | 2.75E-05  | 8.24E-05  |
| ENSDARG00000076448 | serpinf2a        | 0.125451618 | -2.994797014 | 1.57E-16  | 1.11E-15  |
| ENSDARG00000042845 | oxt              | 0.125406293 | -2.995318349 | 1.60E-12  | 8.75E-12  |
| ENSDARG00000089439 | TMEM132A         | 0.124608788 | -3.004522272 | 1.70E-22  | 1.67E-21  |
| ENSDARG00000061836 | nfixb            | 0.12326595  | -3.020153761 | 2.52E-121 | 4.06E-119 |

|                    |                     |             |              |           |           |
|--------------------|---------------------|-------------|--------------|-----------|-----------|
| ENSDARG00000010933 | CACNA1F (1 of 2)    | 0.1221924   | -3.03277354  | 4.46E-104 | 5.05E-102 |
| ENSDARG00000005841 | tnni2a.2            | 0.121732566 | -3.038212929 | 1.01E-168 | 3.25E-166 |
| ENSDARG00000075227 | GRM5 (2 of 2)       | 0.120977667 | -3.047187356 | 1.05E-21  | 9.87E-21  |
| ENSDARG00000087873 | si:ch211-170n20.3   | 0.120785064 | -3.049486026 | 3.95E-153 | 1.05E-150 |
| ENSDARG00000068483 | neto1               | 0.120567401 | -3.052088205 | 2.23E-07  | 8.24E-07  |
| ENSDARG00000053845 | cbln14              | 0.120121475 | -3.057433994 | 4.50E-08  | 1.76E-07  |
| ENSDARG00000027424 | slc25a3a            | 0.119299062 | -3.067345395 | 1.96E-47  | 5.33E-46  |
| ENSDARG00000001760 | TNXB                | 0.116994437 | -3.095488164 | 0         | 0         |
| ENSDARG00000068474 | si:dkey-94e7.2      | 0.113996622 | -3.132937016 | 2.65E-30  | 3.67E-29  |
| ENSDARG00000013051 | C5H11orf53 (1 of 2) | 0.113894099 | -3.134235096 | 2.55E-05  | 7.65E-05  |
| ENSDARG00000078438 | DPP10               | 0.11356877  | -3.138361932 | 2.40E-08  | 9.63E-08  |
| ENSDARG00000009386 | MPP4 (1 of 3)       | 0.113358255 | -3.141038635 | 2.90E-23  | 2.96E-22  |
| ENSDARG00000076978 | pmchl               | 0.112870704 | -3.147257011 | 8.78E-09  | 3.65E-08  |
| ENSDARG00000076043 | si:dkeyp-73d8.9     | 0.1122591   | -3.155095694 | 7.41E-14  | 4.43E-13  |
| ENSDARG00000076015 | PLBD1 (2 of 2)      | 0.111480266 | -3.165139748 | 5.47E-06  | 1.76E-05  |
| ENSDARG00000079413 | PPEF2               | 0.111388594 | -3.166326589 | 5.95E-11  | 2.92E-10  |
| ENSDARG00000059416 | EGFLAM              | 0.111197384 | -3.168805244 | 1.31E-40  | 2.76E-39  |
| ENSDARG00000070666 | rho1                | 0.111114024 | -3.169887185 | 8.86E-09  | 3.68E-08  |
| ENSDARG00000045811 |                     | 0.11016516  | -3.182260053 | 3.93E-19  | 3.23E-18  |
| ENSDARG00000070931 | si:ch211-232m10.6   | 0.109994417 | -3.184497798 | 2.20E-10  | 1.03E-09  |
| ENSDARG00000038018 | prph2a              | 0.108727144 | -3.201215941 | 3.89E-45  | 9.83E-44  |
| ENSDARG00000096558 | si:ch211-80j13.1    | 0.108457415 | -3.204799403 | 9.85E-14  | 5.84E-13  |
| ENSDARG00000093318 | si:dkey-57a22.15    | 0.107737177 | -3.214411933 | 5.54E-111 | 7.35E-109 |
| ENSDARG00000060792 | si:dkey-97i18.6     | 0.107625218 | -3.215911939 | 2.88E-06  | 9.54E-06  |
| ENSDARG00000018530 | mapkapk2b           | 0.107308871 | -3.22015875  | 1.22E-23  | 1.27E-22  |
| ENSDARG00000089411 | TMEM136 (3 of 3)    | 0.106441923 | -3.231861616 | 4.51E-09  | 1.91E-08  |
| ENSDARG00000087663 | PRR35               | 0.105939032 | -3.238693869 | 8.61E-87  | 6.61E-85  |
| ENSDARG00000092792 | zgc:92658           | 0.105771029 | -3.240983565 | 3.23E-22  | 3.12E-21  |
| ENSDARG00000086030 | PCBP3 (2 of 2)      | 0.105248939 | -3.248122404 | 3.48E-292 | 2.99E-289 |
| ENSDARG00000012126 | zgc:109965          | 0.105090156 | -3.250300562 | 2.97E-131 | 5.70E-129 |

|                    |                   |             |              |           |           |
|--------------------|-------------------|-------------|--------------|-----------|-----------|
| ENSDARG00000039602 | atoh1c            | 0.10442765  | -3.259424337 | 1.11E-07  | 4.19E-07  |
| ENSDARG00000068088 | tcnl              | 0.1039776   | -3.26565534  | 8.53E-47  | 2.27E-45  |
| ENSDARG00000007788 | atp2b1b           | 0.102712534 | -3.28331585  | 4.81E-267 | 3.69E-264 |
| ENSDARG00000063293 | neto2b            | 0.102437481 | -3.287184416 | 2.01E-11  | 1.02E-10  |
| ENSDARG00000057790 | ankrd6a           | 0.102423108 | -3.287386845 | 8.40E-26  | 9.58E-25  |
| ENSDARG00000044199 | gnat1             | 0.100328644 | -3.317194538 | 1.48E-121 | 2.40E-119 |
| ENSDARG00000014805 | fhl5              | 0.098833908 | -3.338850108 | 5.01E-16  | 3.42E-15  |
| ENSDARG00000059978 | cplx4a            | 0.098557277 | -3.34289379  | 3.83E-65  | 1.73E-63  |
| ENSDARG00000016480 | slc17a7           | 0.098355017 | -3.34585755  | 5.69E-45  | 1.43E-43  |
| ENSDARG00000023181 | pcp4l1            | 0.09794762  | -3.351845753 | 6.08E-98  | 6.15E-96  |
| ENSDARG00000044861 | opn1lw2           | 0.097657501 | -3.356125332 | 0         | 0         |
| ENSDARG00000078210 | tulp1b            | 0.097273306 | -3.361812232 | 1.80E-76  | 1.10E-74  |
| ENSDARG00000075986 | RIC3 (1 of 2)     | 0.096843079 | -3.368207248 | 1.40E-18  | 1.11E-17  |
| ENSDARG00000093467 | MYH13 (9 of 11)   | 0.09678735  | -3.369037686 | 5.20E-230 | 2.84E-227 |
| ENSDARG00000040274 | SCAMP5 (2 of 2)   | 0.096111664 | -3.37914467  | 3.35E-70  | 1.72E-68  |
| ENSDARG00000040008 | neurod6a          | 0.093684032 | -3.416053028 | 2.49E-164 | 7.69E-162 |
| ENSDARG00000043466 | kcnk3             | 0.093424573 | -3.42005412  | 5.00E-06  | 1.62E-05  |
| ENSDARG00000062906 | kcnv2b            | 0.093400008 | -3.42043351  | 2.23E-24  | 2.39E-23  |
| ENSDARG00000070652 | si:ch211-134a4.1  | 0.092153623 | -3.4398153   | 1.45E-16  | 1.03E-15  |
| ENSDARG00000036140 |                   | 0.091955396 | -3.442921962 | 3.83E-102 | 4.17E-100 |
| ENSDARG00000052223 | rcvrna            | 0.091950209 | -3.443003341 | 1.82E-149 | 4.57E-147 |
| ENSDARG00000028846 | arl3l1            | 0.091893533 | -3.44389286  | 2.37E-86  | 1.80E-84  |
| ENSDARG00000034940 | slc1a7a           | 0.090336509 | -3.468547029 | 1.31E-29  | 1.76E-28  |
| ENSDARG00000089997 | gngt2b            | 0.089066943 | -3.488966115 | 2.70E-262 | 2.02E-259 |
| ENSDARG00000078272 | CABP7 (2 of 2)    | 0.087957933 | -3.507042486 | 1.05E-13  | 6.19E-13  |
| ENSDARG00000087082 | CNGB3 (2 of 2)    | 0.087838153 | -3.509008464 | 3.17E-36  | 5.59E-35  |
| ENSDARG00000053207 | MYH13 (5 of 11)   | 0.087500711 | -3.514561446 | 3.27E-237 | 1.90E-234 |
| ENSDARG00000070726 | cnga3a            | 0.087466964 | -3.515117963 | 9.69E-67  | 4.60E-65  |
| ENSDARG00000070092 | KCNV1             | 0.086601343 | -3.529466791 | 7.33E-13  | 4.09E-12  |
| ENSDARG00000092142 | si:ch211-136a13.2 | 0.085689031 | -3.544745653 | 1.08E-16  | 7.74E-16  |

|                    |                     |             |              |           |           |
|--------------------|---------------------|-------------|--------------|-----------|-----------|
| ENSDARG00000039444 | FAIM2               | 0.084706088 | -3.561390524 | 5.48E-76  | 3.30E-74  |
| ENSDARG00000088751 | IMPG2               | 0.084299543 | -3.568331378 | 1.12E-05  | 3.50E-05  |
| ENSDARG00000095831 | si:ch211-175f12.2   | 0.084170677 | -3.570538473 | 8.95E-23  | 8.89E-22  |
| ENSDARG00000034007 | prom1b              | 0.083698018 | -3.578662732 | 2.15E-306 | 1.97E-303 |
| ENSDARG00000095217 | MYH13 (10 of 11)    | 0.083638261 | -3.579693128 | 9.64E-105 | 1.10E-102 |
| ENSDARG00000059824 | soat2               | 0.083411434 | -3.583611031 | 1.06E-132 | 2.13E-130 |
| ENSDARG00000006467 | pcdh8               | 0.081241797 | -3.621634041 | 2.24E-237 | 1.36E-234 |
| ENSDARG00000010958 | glnnb               | 0.080551877 | -3.63393799  | 5.15E-77  | 3.16E-75  |
| ENSDARG00000012125 | cnga1               | 0.080289273 | -3.63864894  | 3.01E-16  | 2.09E-15  |
| ENSDARG00000075295 | tulp1a              | 0.079460405 | -3.653620041 | 1.37E-134 | 2.84E-132 |
| ENSDARG00000056511 | arr3a               | 0.078973158 | -3.662493805 | 0         | 0         |
| ENSDARG00000030980 | csrp1b              | 0.078454218 | -3.672005167 | 1.35E-15  | 9.03E-15  |
| ENSDARG00000054797 | RDH13 (3 of 3)      | 0.078216731 | -3.676378943 | 1.01E-96  | 1.00E-94  |
| ENSDARG00000095751 | C20H6orf58 (2 of 2) | 0.076686449 | -3.704884521 | 1.58E-07  | 5.90E-07  |
| ENSDARG00000012610 | saga                | 0.07577605  | -3.722114256 | 1.86E-150 | 4.76E-148 |
| ENSDARG00000040627 | GRIK1 (1 of 2)      | 0.075105421 | -3.734939146 | 8.44E-96  | 8.21E-94  |
| ENSDARG00000044280 | opn1mw2             | 0.074668703 | -3.743352523 | 2.00E-26  | 2.36E-25  |
| ENSDARG00000037337 | cnrip1b             | 0.07211794  | -3.793498003 | 2.59E-97  | 2.61E-95  |
| ENSDARG00000034930 | cx52.6              | 0.072070372 | -3.794449902 | 1.95E-12  | 1.06E-11  |
| ENSDARG00000038742 | RBP1                | 0.069718441 | -3.842315875 | 3.99E-08  | 1.57E-07  |
| ENSDARG00000038378 | sagb                | 0.069259635 | -3.851841405 | 9.72E-181 | 3.59E-178 |
| ENSDARG00000095802 | C20H2orf71          | 0.069147346 | -3.854182309 | 2.57E-57  | 9.49E-56  |
| ENSDARG00000075837 | si:dkey-1d7.3       | 0.069113936 | -3.854879556 | 4.78E-63  | 2.04E-61  |
| ENSDARG00000038770 | zgc:103625          | 0.068940093 | -3.858512935 | 2.35E-68  | 1.16E-66  |
| ENSDARG00000045592 | tnni2a.1            | 0.066213235 | -3.916736581 | 9.75E-90  | 7.87E-88  |
| ENSDARG00000076055 | RPGRIP1             | 0.065822981 | -3.925264819 | 9.35E-128 | 1.66E-125 |
| ENSDARG00000011640 | syt5b               | 0.064462284 | -3.955400887 | 0         | 0         |
| ENSDARG00000076872 | MPP4 (3 of 3)       | 0.064051879 | -3.964615307 | 3.80E-43  | 8.96E-42  |
| ENSDARG00000020814 | faimb               | 0.064010398 | -3.965549917 | 4.92E-32  | 7.29E-31  |
| ENSDARG00000002576 | cabp5a              | 0.063982129 | -3.966187202 | 2.43E-07  | 8.96E-07  |

|                    |                     |             |              |           |           |
|--------------------|---------------------|-------------|--------------|-----------|-----------|
| ENSDARG00000042526 | sebox               | 0.063568538 | -3.975543285 | 4.29E-12  | 2.27E-11  |
| ENSDARG00000026926 | rom1b               | 0.062913373 | -3.990489488 | 1.37E-57  | 5.13E-56  |
| ENSDARG00000019902 | rcv1                | 0.062089824 | -4.009499344 | 0         | 0         |
| ENSDARG00000010602 | zgc:112294          | 0.060787892 | -4.040072206 | 3.20E-42  | 7.20E-41  |
| ENSDARG00000079995 | OVOL3               | 0.060206435 | -4.053938496 | 1.72E-07  | 6.40E-07  |
| ENSDARG00000078052 | emilin3a            | 0.059436239 | -4.072513367 | 0         | 0         |
| ENSDARG00000069827 | crygm2d11           | 0.058741483 | -4.089476503 | 0         | 0         |
| ENSDARG00000078440 | ccdc88aa            | 0.058561523 | -4.093903128 | 6.10E-258 | 4.33E-255 |
| ENSDARG00000069017 | elnb                | 0.05755146  | -4.119003666 | 4.25E-196 | 1.83E-193 |
| ENSDARG00000016854 | neurod2             | 0.057375294 | -4.123426553 | 2.15E-77  | 1.33E-75  |
| ENSDARG00000052575 | arl13a              | 0.055444184 | -4.172820068 | 4.73E-107 | 5.74E-105 |
| ENSDARG00000013393 | guca1b              | 0.054999698 | -4.184432485 | 2.79E-06  | 9.26E-06  |
| ENSDARG00000077875 | slc2a5              | 0.05320888  | -4.23218916  | 2.88E-40  | 5.98E-39  |
| ENSDARG00000040948 | olig1               | 0.052974288 | -4.238563892 | 1.24E-37  | 2.30E-36  |
| ENSDARG00000088638 | si:dkey-188p4.1     | 0.052791029 | -4.243563415 | 4.49E-09  | 1.91E-08  |
| ENSDARG00000089270 | FP102168.1          | 0.052749804 | -4.244690444 | 1.39E-06  | 4.75E-06  |
| ENSDARG00000030626 | lrit2               | 0.052600142 | -4.248789508 | 1.04E-14  | 6.57E-14  |
| ENSDARG00000062661 | abca4b              | 0.052596824 | -4.248880492 | 1.13E-192 | 4.72E-190 |
| ENSDARG00000095328 | si:ch211-191i18.4   | 0.051293568 | -4.285078267 | 9.48E-07  | 3.30E-06  |
| ENSDARG00000037656 | si:ch1073-417l11.1  | 0.050803353 | -4.298932462 | 3.82E-50  | 1.14E-48  |
| ENSDARG00000062902 | TULP2               | 0.048090688 | -4.37809861  | 2.20E-94  | 2.09E-92  |
| ENSDARG00000052057 | PCOLCE (1 of 2)     | 0.048056917 | -4.379112094 | 6.69E-117 | 1.01E-114 |
| ENSDARG00000043820 | nme2a               | 0.047465733 | -4.396969842 | 5.67E-57  | 2.07E-55  |
| ENSDARG00000041205 | slc6a1l             | 0.047431866 | -4.397999554 | 1.07E-10  | 5.17E-10  |
| ENSDARG00000007024 | uox                 | 0.046511042 | -4.426282925 | 3.73E-83  | 2.67E-81  |
| ENSDARG00000090722 | C20H6orf58 (1 of 2) | 0.046200605 | -4.435944459 | 3.26E-181 | 1.22E-178 |
| ENSDARG00000001993 | myhb                | 0.045147367 | -4.469214325 | 0         | 0         |
| ENSDARG00000037588 | bhlhe23             | 0.044872086 | -4.478037948 | 1.74E-256 | 1.20E-253 |
| ENSDARG00000057427 | sv2ba               | 0.044429698 | -4.49233185  | 1.04E-261 | 7.61E-259 |
| ENSDARG00000019782 |                     | 0.044135119 | -4.501929112 | 4.17E-32  | 6.21E-31  |

|                    |                    |             |              |           |           |
|--------------------|--------------------|-------------|--------------|-----------|-----------|
| ENSDARG00000021345 | prph2l             | 0.044118472 | -4.502473367 | 5.39E-60  | 2.14E-58  |
| ENSDARG00000055053 | CR558302.3         | 0.043330703 | -4.528466559 | 6.33E-54  | 2.12E-52  |
| ENSDARG00000069615 | ckmt2a             | 0.043081841 | -4.536776297 | 0         | 0         |
| ENSDARG00000005776 | guk1b              | 0.041556533 | -4.588780889 | 2.30E-124 | 3.86E-122 |
| ENSDARG00000092269 | si:dkeyp-41f9.4    | 0.040578338 | -4.623146398 | 6.43E-66  | 2.96E-64  |
| ENSDARG00000058103 | glra4b             | 0.040415118 | -4.628961146 | 8.42E-30  | 1.14E-28  |
| ENSDARG00000030750 | gabrr3b            | 0.039847975 | -4.649349765 | 8.00E-28  | 9.98E-27  |
| ENSDARG00000030215 | matn1              | 0.039710841 | -4.654323257 | 0         | 0         |
| ENSDARG00000076565 | GPR151             | 0.039496456 | -4.66213299  | 2.78E-16  | 1.93E-15  |
| ENSDARG00000002193 | rho                | 0.039299013 | -4.669363097 | 0         | 0         |
| ENSDARG00000086360 | RP1 (2 of 2)       | 0.038618808 | -4.694552553 | 2.38E-86  | 1.80E-84  |
| ENSDARG00000034628 | slc1a8a            | 0.038166951 | -4.71153224  | 1.47E-91  | 1.28E-89  |
| ENSDARG00000003317 | si:dkeyp-35f12.3   | 0.035818155 | -4.803165162 | 1.67E-47  | 4.56E-46  |
| ENSDARG00000089063 | lactbl1a           | 0.03444861  | -4.859410408 | 1.97E-64  | 8.68E-63  |
| ENSDARG00000038894 | tmx3               | 0.031037389 | -5.00984901  | 3.01E-141 | 6.62E-139 |
| ENSDARG00000061101 | snx19a             | 0.026527528 | -5.236365964 | 1.10E-75  | 6.55E-74  |
| ENSDARG00000004358 | gnb3a              | 0.026011434 | -5.264710274 | 0         | 0         |
| ENSDARG00000041162 | GRM1 (2 of 2)      | 0.025408959 | -5.298518893 | 3.24E-14  | 1.98E-13  |
| ENSDARG00000094594 | si:dkeyp-8k3.1     | 0.025374822 | -5.300458501 | 5.01E-08  | 1.95E-07  |
| ENSDARG00000011113 | chrna10a           | 0.024272441 | -5.364536973 | 6.43E-15  | 4.12E-14  |
| ENSDARG00000088025 |                    | 0.023448109 | -5.414384615 | 1.09E-08  | 4.52E-08  |
| ENSDARG00000019752 | rom1a              | 0.02178777  | -5.520337629 | 4.76E-69  | 2.37E-67  |
| ENSDARG00000060017 | CLEC3A             | 0.021443757 | -5.543298474 | 4.60E-45  | 1.16E-43  |
| ENSDARG00000063519 | PLEKHB1 (1 of 2)   | 0.021329005 | -5.55103955  | 1.57E-09  | 6.92E-09  |
| ENSDARG00000076643 | GPR179 (1 of 2)    | 0.019723315 | -5.663954157 | 3.55E-09  | 1.52E-08  |
| ENSDARG00000027236 | rs1a               | 0.016653928 | -5.907993669 | 0         | 0         |
| ENSDARG00000096756 | si:ch211-196c10.13 | 0.010659574 | -6.55170642  | 1.94E-52  | 6.18E-51  |
| ENSDARG00000079443 |                    | 0.006914078 | -7.176247449 | 7.06E-31  | 1.00E-29  |
