# Supplementary material for: Whole organism transcriptome analysis of zebrafish models of Bardet-Biedl Syndrome and Alström Syndrome provides mechanistic insight into shared and divergent phenotypes
Source: PubMed Central journal article supplement (PMC4855444; doi:10.1186/s12864-016-2679-1), 2016-05-03

Supplementary Figure 3.

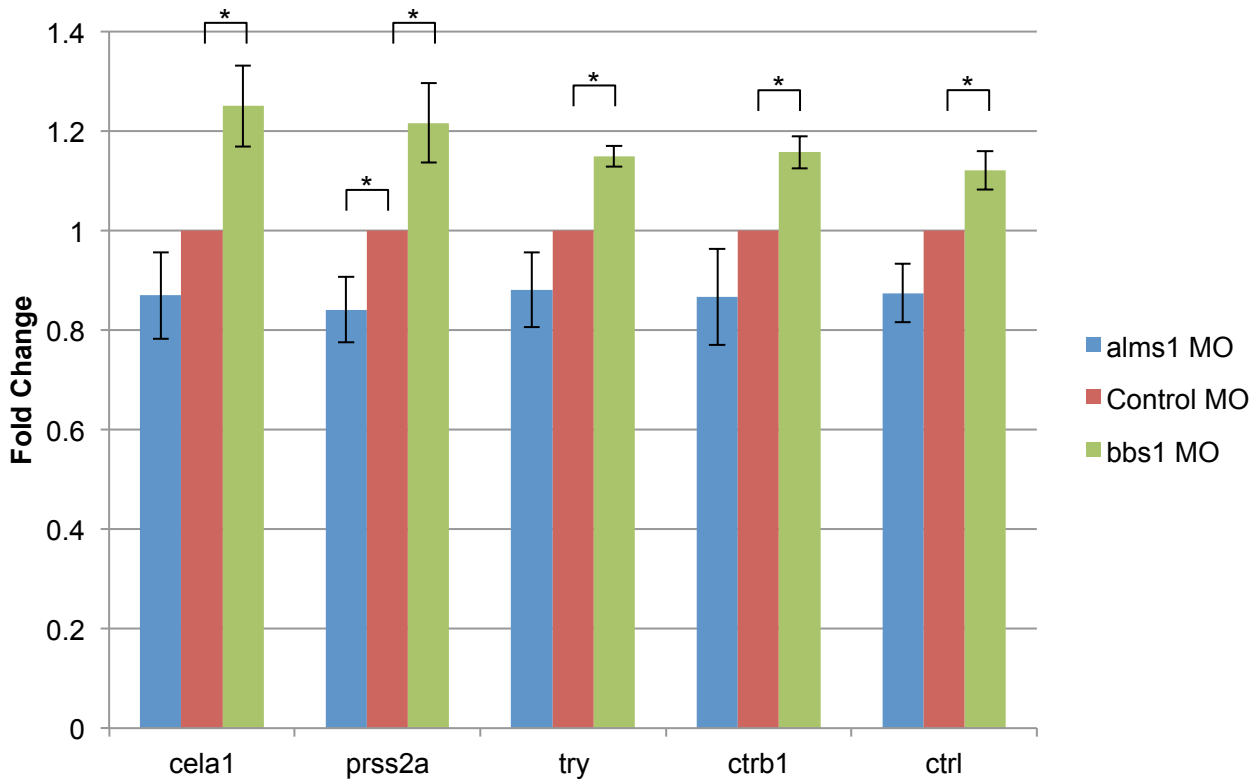

Supplement: 12864_2016_2679_MOESM5_ESM.pdf [file 12864_2016_2679_MOESM5_ESM.pdf]
